# Supplementary material for: miR-9 regulates basal ganglia-dependent developmental vocal learning and adult vocal performance in songbirds
Source: eLife journal article supplement (doi:10.7554/elife.29087), 2018-01-18
Supplement: supp [file elife-29087-supp-v1.zip]

Archive with 18 entries (18 files):
- elife_poa_e29087_Supplementary_file_2.xlsx
- elife_poa_e29087_Figure_4_source_data_1.xlsx
- elife_poa_e29087_Transparent_Reporting_File.pdf
- elife_poa_e29087_Figure_6_figure_supplement_1.pdf
- elife_poa_e29087_Audio_File_2.unk
- elife_poa_e29087_Audio_file_1.unk
- elife_poa_e29087_Figure_2_source_data_1.xlsx
- elife_poa_e29087_Figure_1_figure_supplement1.pdf
- elife_poa_e29087_Figure_1_figure_supplement2.pdf
- elife_poa_e29087_Audio_File_4.unk
- elife_poa_e29087_Audio_File_3.unk
- elife_poa_e29087_Figure_8_figure_supplement_1.pdf
- elife_poa_e29087_Figure_3_source_data_1.xlsx
- elife_poa_e29087_Audio_File_5.unk
- elife_poa_e29087_Figure_7_figure_supplement_1.pdf
- elife_poa_e29087_Supplementary_file_1.xlsx
- elife_poa_e29087_Figure_5_source_data_1.xlsx
- elife_poa_e29087_Figure_3_figure_supplement_1.pdf
