# Supplementary material for: miR-9 regulates basal ganglia-dependent developmental vocal learning and adult vocal performance in songbirds
Source: eLife journal article supplement (doi:10.7554/elife.29087), 2018-01-18
Supplement: supp [file elife-29087-supp-v1.zip › elife_poa_e29087_Figure_2_source_data_1.xlsx]

## Sheet: SUMMARY
control					tutor					miR-9					tutor
			copied, %										copied, %
grey 140	Total motif #	42			blue 68	Total motif #	20			grey 139	Total motif #	28			Blue 63-1st	Total motif #	28
	Total copied syllable #	292				Total copied syllable #	139				Total copied syllable #	140				Total copied syllable #	186
	Syllable/Motif	6.95238	1.00034			Syllable/Motif	6.95				Syllable/Motif	5	0.752688			Syllable/Motif	6.64286
	Copied syllable type	7				syllable type	7				Copied syllable type	5				Syllable type	7
	# of motif with repeat	0				# of motif with repeat	0				# of motif with repeat	0				# of motif with repeat	0
	# of motif with syntax change	0				# of motif with syntax change	0				# of motif with syntax change	0				# of motif with syntax change	0
grey 147	Total motif #	93			green 13	Total motif #	50			Grey 146	Total motif #	47			black 33-2nd-recount	Total motif #	32
	Total copied syllable #	436				Total copied syllable #	240				Total copied syllable #	287				Total copied syllable #	285
	Syllable/Motif	4.68817	0.976703			Syllable/Motif	4.8				Syllable/Motif	6.10638	0.685629			Syllable/Motif	8.90625
	Copied syllable type	6				Copied syllable type	6				Copied syllable type	9				Copied syllable type	9
	# of motif with repeat	0				# of motif with repeat	0				# of motif with repeat	0				# of motif with repeat	0
	# of motif with syntax change	0				# of motif with syntax change	0				# of motif with syntax change	40				# of motif with syntax change	0
											% motif with syntax change	85.1064
grey 180	Total motif #	67			Blue 63-1st	Total motif #	28			yellow 14	Total motif #	47			black 45-2nd	Total motif #	26
	Total copied syllable #	444				Total copied syllable #	186				Total copied syllable #	288				Total copied syllable #	145
	Syllable/Motif	6.62687	0.997593			Syllable/Motif	6.64286				Syllable/Motif	6.13	1.09917			Syllable/Motif	5.57692
	Copied syllable type	7				Syllable type	7				Copied syllable type	7 (lost G)				syllable type	8
	# of motif with repeat	0				# of motif with repeat	0				# of motif with repeat	0				# of motif with repeat	0
	# of motif with syntax change	0				# of motif with syntax change	0				# of motif with syntax change	0				# of motif with syntax change	0
yellow 16	Total motif #	53			black 33-2nd-recount	Total motif #	32			yellow 23	Total motif #	37			blue 63-2nd	Total motif #	20
	Total copied syllable #	463				Total copied syllable #	285				Total copied syllable #	171				Total copied syllable #	121
	Syllable/Motif	8.73585	0.980867			Syllable/Motif	8.90625				Syllable/Motif	4.62162	0.763904			Syllable/Motif	6.05
	Copied syllable type	9				syllable type	9				Copied syllable type	5				Syllable type	7
	# of motif with repeat	0				# of motif with repeat	0				# of motif with repeat	0				# of motif with repeat	0
	# of motif with syntax change	0				# of motif with syntax change	0				# of motif with syntax change	13				# of motif with syntax change	0
											% motif with syntax change	35.1351
yellow 29	Total motif #	54			black 33-2nd-recount	Total motif #	32			yellow 30	Total motif #	90			black 45-2nd	Total motif #	26
	Total copied syllable #	468				Total copied syllable #	285				Total copied syllable #	315				Total copied syllable #	145
	Syllable/Motif	8.66667	0.973099			Syllable/Motif	8.90625				Syllable/Motif	3.5	0.627586			Syllable/Motif	5.57692
	Copied syllable type	9				syllable type	9				Copied syllable type	5(lost D,F,G)				syllable type	8
	# of motif with repeat	0				# of motif with repeat	0				# of motif with repeat	0				# of motif with repeat	0
	# of motif with syntax change	0				# of motif with syntax change	0				# of motif with syntax change	21				# of motif with syntax change	0
											% motif with syntax change	23.3333
yellow 37	Total motif #	40			blue 59	Total motif #	16			yellow 33	Total motif #	96			green 68	Total motif #	44
	Total copied syllable #	312				Total copied syllable #	128				Total copied syllable #	277				Total copied syllable #	163
	Syllable/Motif	7.8	0.975			Syllable/Motif	8				Syllable/Motif	2.88542	0.778885			Syllable/Motif	3.70455
	Copied syllable type	9				syllable type	9				Copied syllable type	4				syllable type	6
	# of motif with repeat	0				# of motif with repeat	0				# of motif with repeat	0				# of motif with repeat	0
	# of motif with syntax change	0				# of motif with syntax change	0				# of motif with syntax change	34				# of motif with syntax change	0
											% motif with syntax change	35.4167

## Sheet: blue 63-1st
Song File	Duration	Motif	Syllable #	Syllable							# total syllable type
1_June_29_2012_30198093	858-1549	1	6	A	B	C	E	F	G		7
	1609-2343	2	6	A	B	C	E	F	G
	2387-3245	3	7	A	B	C	D	E	F	G
	3290-4146	4	7	A	B	C	D	E	F	G
1_June_29_2012_30493296	2799-3500	1	6	A	B	C	E	F	G
	3554-4412	2	7	A	B	C	D	E	F	G
1_June_29_2012_32519515	261-1146	1	7	A	B	C	D	E	F	G
	1192-2079	2	7	A	B	C	D	E	F	G
1_June_29_2012_32846843	304-1173	1	7	A	B	C	D	E	F	G
	1230-2127	2	7	A	B	C	D	E	F	G
1_June_29_2012_33464640	248-954	1	6	A	B	C	E	F	G
	1011-1866	2	7	A	B	C	D	E	F	G
	1916-2787	3	7	A	B	C	D	E	F	G
	2835-3716	4	7	A	B	C	D	E	F	G
1_June_29_2012_34453812	2922-3617	1	6	A	B	C	E	F	G
	3670-4516	2	7	A	B	C	D	E	F	G
1_June_29_2012_39787500	1281-1972	1	6	A	B	C	E	F	G
	2012-2708	2	6	A	B	C	E	F	G
	2771-3594	3	7	A	B	C	D	E	F	G
	3642-4490	4	7	A	B	C	D	E	F	G
1_June_29_2012_39889718	960-1653	1	6	A	B	C	E	F	G
	1710-2552	2	7	A	B	C	D	E	F	G
	2598-3474	3	7	A	B	C	D	E	F	G
1_June_29_2012_40247484	2557-3257	1	6	A	B	C	E	F	G
	3307-4135	2	7	A	B	C	D	E	F	G
1_June_29_2012_42635281	1864-2577	1	6	A	B	C	E	F	G
	2626-3471	2	7	A	B	C	D	E	F	G
	3521-4412	3	7	A	B	C	D	E	F	G
	Total	28	186
		Total motif #	28
		Total copied syllable #	186
		Syllable/Motif	6.64286
		Syllable type	7
		# of motif with repeat	0
		# of motif with syntax change	0
		# of motif with addition	0

## Sheet: grey 180
Song File	Duration	Motif	Syllable #	Syllable							# total syllable type
4_February_25_2014_31163140	286-960	1	6	A	B	C	E	F	G		7
	1004-1684	2	6	A	B	C	E	F	G
	1727-2413	3	6	A	B	C	E	F	G
	2443-3267	4	7	A	B	C	D	E	F	G
	3303-4135	5	7	A	B	C	D	E	F	G
4_February_25_2014_32555062	127-823	1	6	A	B	C	E	F	G
	861-1563	2	6	A	B	C	E	F	G
	1601-2423	3	7	A	B	C	D	E	F	G
	2462-3291	4	7	A	B	C	D	E	F	G
4_February_25_2014_32637312	6-693	1	6	A	B	C	E	F	G
	742-1544	2	7	A	B	C	D	E	F	G
	1584-2405	3	7	A	B	C	D	E	F	G
	2451-3274	4	7	A	B	C	D	E	F	G
4_February_25_2014_34187781	453-1126	1	6	A	B	C	E	F	G
	1171-1974	2	7	A	B	C	D	E	F	G
4_February_25_2014_35801078	220-1024	1	7	A	B	C	D	E	F	G
	1071-1870	2	7	A	B	C	D	E	F	G
	1914-2722	3	7	A	B	C	D	E	F	G
	2763-3455	4	7	A	B	C	D	E	F	G
	3502-4318	5	7	A	B	C	D	E	F	G
4_February_25_2014_35806187	1739-2579	1	7	A	B	C	D	E	F	G
4_February_25_2014_35889625	3204-3885	1	6	A	B	C	E	F	G
	3931-4742	2	7	A	B	C	D	E	F	G
4_February_25_2014_35961265	2384-3076	1	6	A	B	C	E	F	G
	3122-3819	2	7	A	B	C	D	E	F	G
	3868-4674	3	7	A	B	C	D	E	F	G
4_February_25_2014_36015109	2975-3660	1	6	A	B	C	E	F	G
	3703-4518	2	7	A	B	C	D	E	F	G
4_February_25_2014_36020187	232-1056	1	7	A	B	C	D	E	F	G
	1101-1807	2	6	A	B	C	E	F	G
	1855-2701	3	7	A	B	C	D	E	F	G
4_February_25_2014_36320234	570-1383	1	7	A	B	C	D	E	F	G
	1424-2252	2	7	A	B	C	D	E	F	G
	2299-2999	3	6	A	B	C	E	F	G
4_February_25_2014_36819593	513-1330	1	7	A	B	C	D	E	F	G
	1372-2188	2	7	A	B	C	D	E	F	G
	2230-3054	3	7	A	B	C	D	E	F	G
	3096-3945	4	7	A	B	C	D	E	F	G
	3988-4825	5	7	A	B	C	D	E	F	G
4_February_25_2014_36854203	231-1054	1	7	A	B	C	D	E	F	G
	1097-1933	2	7	A	B	C	D	E	F	G
	1980-2817	3	7	A	B	C	D	E	F	G
4_February_25_2014_38315750	364-1042	1	6	A	B	C	E	F	G
	1086-1879	2	7	A	B	C	D	E	F	G
	1923-2722	3	7	A	B	C	D	E	F	G
4_February_25_2014_38735406	1106-1771	1	6	A	B	C	E	F	G
	2778-3449	2	6	A	B	C	E	F	G
	3500-4299	3	7	A	B	C	D	E	F	G
	4344-5029	4	6	A	B	C	E	F	G
4_February_25_2014_38772359	449-1129	1	6	A	B	C	E	F	G
	1174-1988	2	7	A	B	C	D	E	F	G
	2038-2850	3	7	A	B	C	D	E	F	G
	2898-3832	4	7	A	B	C	D	E	F	G
4_February_25_2014_38919687	1310-1982	1	6	A	B	C	E	F	G
	2029-2723	2	6	A	B	C	E	F	G
	2772-3582	3	7	A	B	C	D	E	F	G
	3624-4320	4	6	A	B	C	E	F	G
4_February_25_2014_39042281	723-1411	1	6	A	B	C	E	F	G
	1462-2156	2	6	A	B	C	E	F	G
	2207-3021	3	7	A	B	C	D	E	F	G
	3066-3893	4	7	A	B	C	D	E	F	G
	3944-4647	5	6	A	B	C	E	F	G
4_February_25_2014_39085781	760-1467	1	6	A	B	C	E	F	G
	1510-2231	2	6	A	B	C	E	F	G
	2276-3104	3	7	A	B	C	D	E	F	G
	3156-3988	4	7	A	B	C	D	E	F	G
	4037-4880	5	7	A	B	C	D	E	F	G
	Ttoal	67	444
	Total motif #	67
	Total copied syllable #	444
	Syllable/Motif	6.62687
	Copied syllable type	7
	# of motif with repeat	0
	# of motif with syntax change	0
	# of motif with addition	0

## Sheet: grey 139
Song File	Duration	Motif	Syllable #	Syllable					# total syllable type
4_December_06_2013_29448828	2451-3130	1	5	A	B	D	F	G	5
4_December_06_2013_30733031	2234-2912	1	5	A	B	D	F	G
4_December_06_2013_30893453	2029-2701	1	5	A	B	D	F	G
	2753-3416	1	5	A	B	D	F	G
4_December_06_2013_30970546	2270-2934	1	5	A	B	D	F	G
	2980-3654	2	5	A	B	D	F	G
4_December_06_2013_31215421	1064-1736	1	5	A	B	D	F	G
	3077-3764	2	5	A	B	D	F	G
4_December_06_2013_31394937	1001-1668	1	5	A	B	D	F	G
	1708-2398	2	5	A	B	D	F	G
4_December_06_2013_31488984	1304-1971	1	5	A	B	D	F	G
	2015-2707	2	5	A	B	D	F	G
4_December_06_2013_32388953	4209-4882	1	5	A	B	D	F	G
4_December_06_2013_32966906	1108-1782	1	5	A	B	D	F	G
	1832-2508	2	5	A	B	D	F	G
4_December_06_2013_33060703	2175-2856	1	5	A	B	D	F	G
4_December_06_2013_33191109	2440-3117	1	5	A	B	D	F	G
4_December_06_2013_33244968	1333-2013	1	5	A	B	D	F	G
	2060-2750	2	5	A	B	D	F	G
4_December_06_2013_33432953	1036-1715	1	5	A	B	D	F	G
4_December_06_2013_33492156	884-1560	1	5	A	B	D	F	G
4_December_06_2013_33548218	750-1433	1	5	A	B	D	F	G
4_December_06_2013_33693968	3348-4019	1	5	A	B	D	F	G
4_December_06_2013_37935328	1283-1945	1	5	A	B	D	F	G
	1987-2674	2	5	A	B	D	F	G
4_December_06_2013_38043015	1555-2225	1	5	A	B	D	F	G
4_December_06_2013_39322359	1555-2216	1	5	A	B	D	F	G
4_December_06_2013_39457000	899-1571	1	5	A	B	D	F	G
	TOTAL	28	140
	mean	5
	Total motif #	28
	Total copied syllable #	140
	Syllable/Motif	5
	Copied syllable type	5
	# of motif with repeat	0
	# of motif with syntax change	0
	# of motif with addition	0

## Sheet: blue 63-2nd
song file	Motif	Duration	Syllable #	Syllables							Syllable type
3_February_06_2015_29222531	1	1885-2607	6	A	B	C	E	F	G		7
3_February_06_2015_30533640	1	1984-2695	6	A	B	C	E	F	G
3_February_06_2015_31165375	1	424-1142	6	A	B	C	E	F	G
	2	1199-2102	7	A	B	C	D	E	F	G
	3	2160-2894	6	A	B	C	E	F	G
3_February_06_2015_34206109	1	2387-3071	6	A	B	C	E	F	G
	2	3116-3874	6	A	B	C	E	F	G
3_February_06_2015_34373765	1	630-1333	6	A	B	C	E	F	G
	2	2499-3211	6	A	B	C	E	F	G
3_February_06_2015_34815687	1	786-1511	6	A	B	C	E	F	G
3_February_06_2015_35640093	1	1140-1846	6	A	B	C	E	F	G
	2	1897-2599	6	A	B	C	E	F	G
3_February_06_2015_40157656	1	1013-1845	6	A	B	C	E	F	G
	2	1890-2588	6	A	B	C	E	F	G
	3	2639-3353	6	A	B	C	E	F	G
	4	3398-4123	6	A	B	C	E	F	G
3_February_06_2015_40980078	1	2309-3014	6	A	B	C	E	F	G
	2	3066-3787	6	A	B	C	E	F	G
	3	3837-4549	6	A	B	C	E	F	G
3_February_06_2015_43053515	1	3858-4572	6	A	B	C	E	F	G
total	20		121
Total motif #	20
Total copied syllable #	121
Syllable/Motif	6.05
Syllable type	7
# of motif with repeat	0
# of motif with syntax change	0
# of motif with addition	0

## Sheet: yellow 23
Song File	Duration	Motif	Syllable #	Syllable										repeat	Copied syllable from tutor		Syllable switch	addition	# total syllable type
2_May_12_2015_28925406	3537-4643	1	8	B	H	D	D	F	G	A'	I			1-D	5		1-A'		7
2_May_12_2015_29070984	235-1120	1	6	H	D	F	G	A'	I						4		1-A'
2_May_12_2015_30013453	157-1013	1	6	H	D	F	G	A'	I						4		1-A'
	1071-2070	2	7	B	H	D	F	G	A'	I					5		1-A'
2_May_12_2015_30829906	561-1683	1	8	A	B	H	D	F	G	A'	I				5
	2096-3271	2	9	A	H	D	D	D	F	G	A'	I		2-D	5
2_May_12_2015_34839890	1544-2275	1	5	B	H	D	F	G							4
	3752-4792	2	7	H	D	D	F	G	A'	I				1-D	4		1-A'
2_May_12_2015_35472187	684-1692	1	7	A	B	H	D	D	F	G				1-D	5
	2259-2861	2	4	H	D	F	G								3
2_May_12_2015_35792203	1081-2196	1	8	B	H	D	D	F	G	A'	I			1-D	5		1-A'
	2575-3754	2	8	A	H	D	D	F	G	A'	I			1-D	5
	3989-4884	3	6	A	H	D	D	F	G					1-D	4
2_May_12_2015_36232796	632-1450	1		B	H	D	D	F	G					1-D	4
	1492-2735	2		A	B	H	D	D	D	D	F	G		3-D	5
2_May_12_2015_36527609	3475-4710	1		B	H	D	D	D	F	G	A'	I		2-D	5		1-A'
2_May_12_2015_36932343	127-1276	1		B	H	D	D	F	G	A'	I			1-D	5		1-A'
	1321-2594	2		B	H	D	D	D	F	G	A'	I		2-D	5		1-A'
	2883-3996	3		A	B	H	D	D	D	F	G			2-D	5
	4045-4909	4		A	B	H	D	F	G						5
2_May_12_2015_37739890	1028-2503	1		B	H	H	D	D	D	F	G	A'	I	2-D	5		1-A'
	2548-4018	2		B	H	D	D	D	D	F	G	A'	I	3-D	5		1-A'
2_May_12_2015_39556281	655-1804	1		A	B	H	D	F	G	A'	I				5
	2022-3158	2		A	B	H	D	F	G	A'	I				5
	3568-4474	3		H	D	D	D	F	G					2-D	4
2_May_12_2015_39865828	792-1967	1		A	H	D	D	F	G	A'	I			2-D	5
	2036-3057	2		B	H	D	F	G	A'	I					5
	3562-4609	3		B	H	D	D	F	G	A'	I			1-D	5		1-A'
2_May_12_2015_40261406	10-972	1		A	H	D	D	F	G					1-D	5
	1373-2570	2		A	B	H	D	F	G	A'	I				5
2_May_12_2015_40556453	1669-2679	1		A	H	D	D	F	G					1-D	4
2_May_12_2015_41116390	1804-2961	1		H	D	D	D	F	G	A'	I			2-D	4		1-A'
2_May_12_2015_41560656	795-1773	1		B	H	D	D	D	F	G				2-D	4
2_May_12_2015_42524687	137-1412	1		A	B	H	D	D	F	G	A'	I		2-D	5
2_May_12_2015_42880609	2643-3644	1		B	H	D	F	G	A'	I					5
	3733-4893	2		B	H	D	D	D	D	F	G			3-D	4
2_May_12_2015_43068781	2218-3322	1		A	H	D	F	G	A'	I					4
	TOTAL	37												23	171
	MEAN	4.62162
Total motif #	37
Total copied syllable #	171
Syllable/Motif	4.62162
Copied syllable type	5
# of motif with repeat	0
# of motif with syntax change	13		0.351351
# of motif with addition	33		0.891892

## Sheet: blue 68
SonF EilD	Curation	Motif	Syllable #	Syllable							Repeat	Unique syllabel	# total syllable
1_July_22_2014_36094515	633-1647	1	7	A	B	A'	C	D	E	F	1	6	7
	1743-2553	2	6	A	B	A'	C	D	E		1	5
1_July_22_2014_36105125	1943-2953	1	7	A	B	A'	C	D	E	F	1	6
1_July_22_2014_36672375	853-1849	1	7	A	B	A'	C	D	E	F	1	6
1_July_22_2014_38187703	1900-2885	1	7	A	B	A'	C	D	E	F	1	6
1_July_22_2014_38187703	2961-3945	2	7	A	B	A'	C	D	E	F	1	6
1_July_22_2014_39612953	3102-4114	1	7	A	B	A'	C	D	E	F	1	6
1_July_22_2014_39742296	1976-2095	1	7	A	B	A'	C	D	E	F	1	6
1_July_22_2014_39742296	2225-3241	2	7	A	B	A'	C	D	E	F	1	6
1_July_22_2014_39742296	3355-4369	3	7	A	B	A'	C	D	E	F	1	6
1_July_22_2014_39774218	1000-2007	1	7	A	B	A'	C	D	E	F	1	6
1_July_22_2014_39774218	2112-3128	2	7	A	B	A'	C	D	E	F	1	6
1_July_22_2014_40267031	1535-2551	1	7	A	B	A'	C	D	E	F	1	6
1_July_22_2014_40267031	2698-3708	2	7	A	B	A'	C	D	E	F	1	6
1_July_22_2014_41761375	533-1527	1	7	A	B	A'	C	D	E	F	1	6
1_July_22_2014_41761375	1609-2609	2	7	A	B	A'	C	D	E	F	1	6
1_July_22_2014_41761375	2731-3732	3	7	A	B	A'	C	D	E	F	1	6
1_July_22_2014_41761375	3852-4830	4	7	A	B	A'	C	D	E	F	1	6
1_July_22_2014_42555671	255-1249	1	7	A	B	A'	C	D	E	F	1	6
1_July_22_2014_42555671	1347-2349	2	7	A	B	A'	C	D	E	F	1	6
	Total	20	139									119
Total motif #	20
Total copied syllable #	139
Syllable/Motif	6.95
syllable type	7
# of motif with repeat	0
# of motif with syntax change	0
# of motif with addition	0

## Sheet: grey 140
Song File	Duration	Motif	Syllable #	Syllable							repeat	# total syllable type
2_December_06_2013_28805500	1533-2554	1	7	A	B	A'	C	D	E	F		7
2_December_06_2013_28805500	2631-3656	2	7	A	B	A'	C	D	E	F
2_December_06_2013_28805500	3734-4768	3	7	A	B	A'	C	D	E	F
2_December_06_2013_29346593	1282-2306	1	7	A	B	A'	C	D	E	F
2_December_06_2013_29346593	2392-3426	2	7	A	B	A'	C	D	E	F
2_December_06_2013_29378859	827-1847	1	7	A	B	A'	C	D	E	F
2_December_06_2013_29378859	1923-2950	2	7	A	B	A'	C	D	E	F
2_December_06_2013_29728046	892-1878	1	7	A	B	A'	C	D	E	F
2_December_06_2013_29768968	894-1886	1	7	A	B	A'	C	D	E	F
2_December_06_2013_29768968	1971-2974	2	7	A	B	A'	C	D	E	F
2_December_06_2013_30534171	1963-2955	1	7	A	B	A'	C	D	E	F
2_December_06_2013_30534171	3010-4005	2	7	A	B	A'	C	D	E	F
2_December_06_2013_30534171	4086-5036	3	7	A	B	A'	C	D	E	F
2_December_06_2013_30683093	816-1832	1	7	A	B	A'	C	D	E	F
2_December_06_2013_31745625	123-1095	1	7	A	B	A'	C	D	E	F
2_December_06_2013_31846515	1427-2418	1	7	A	B	A'	C	D	E	F
2_December_06_2013_31846515	2503-3488	2	7	A	B	A'	C	D	E	F
2_December_06_2013_31846515	3575-4567	3	7	A	B	A'	C	D	E	F
2_December_06_2013_32024437	791-1764	1	7	A	B	A'	C	D	E	F
2_December_06_2013_32024437	1842-2824	2	7	A	B	A'	C	D	E	F
2_December_06_2013_32024437	2912-3906	3	7	A	B	A'	C	D	E	F
2_December_06_2013_32024437	3983-4983	4	7	A	B	A'	C	D	E	F
2_December_06_2013_32323875	118-1121	1	7	A	B	A'	C	D	E	F
2_December_06_2013_32556625	467-1456	1	7	A	B	A'	C	D	E	F
2_December_06_2013_32556625	1525-2511	2	7	A	B	A'	C	D	E	F
2_December_06_2013_32556625	2601-3593	3	7	A	B	A'	C	D	E	F
2_December_06_2013_32556625	3645-4647	4	7	A	B	A'	C	D	E	F
2_December_06_2013_33310078	197-975	1	6	A	B	A'	C	D	E
2_December_06_2013_33387781	1711-2688	1	7	A	B	A'	C	D	E	F
2_December_06_2013_33387781	3069-4055	2	7	A	B	A'	C	D	E	F
2_December_06_2013_33387781	4119-5036	3	7	A	B	A'	C	D	E	F
2_December_06_2013_33939187	909-1879	1	7	A	B	A'	C	D	E	F
2_December_06_2013_33939187	1960-2938	2	7	A	B	A'	C	D	E	F
2_December_06_2013_33939187	2921-3990	3	7	A	B	A'	C	D	E	F
2_December_06_2013_33939187	4065-5033	4	7	A	B	A'	C	D	E	F
2_December_06_2013_34920078	2017-2997	1	7	A	B	A'	C	D	E	F
2_December_06_2013_35213406	225-1184	1	7	A	B	A'	C	D	E	F
2_December_06_2013_38011562	1963-2996	1	7	A	B	A'	C	D	E	F
2_December_06_2013_38011562	3060-4101	2	7	A	B	A'	C	D	E	F
2_December_06_2013_38011562	4169-5008	3	6	A	B	A'	C	D	E
2_December_06_2013_38063546	1232-2265	1	7	A	B	A'	C	D	E	F
2_December_06_2013_38191046	214-1232	1	7	A	B	A'	C	D	E	F
	total	42	292
	Total motif #	42
	Total copied syllable #	292
	Syllable/Motif	6.95238
	Copied syllable type	7
	# of motif with repeat	0
	# of motif with syntax change	0
	# of motif with addition	0

## Sheet: yellow 16
Song File	Duration	otif	Syllable #	Syllable									Addition	repeat	# total syllable type
1_Deceber_10_2014_29923015	918-1824	1	8	J	C	D	E	F	G	H	I		1-J		9
	1865-2898	2	9	A	B	C	D	E	F	G	H	I
	3205-4116	3	8	J	C	D	E	F	G	H	I		1-J
1_Deceber_10_2014_29929546	2-1015	1	9	A	B	C	D	E	F	G	H	I
	1042-2073	2	9	A	B	C	D	E	F	G	H	I
	2908-3808	3	8	J	C	D	E	F	G	H	I		1-J
1_Deceber_10_2014_30169328	274-1286	1	9	A	B	C	D	E	F	G	H	I
	1313-2320	2	9	A	B	C	D	E	F	G	H	I
	2350-3367	3	9	A	B	C	D	E	F	G	H	I
	3405-4420	4	9	A	B	C	D	E	F	G	H	I
1_Deceber_10_2014_30282109	208-1199	1	9	A	B	C	D	E	F	G	H	I
	1232-2222	2	9	A	B	C	D	E	F	G	H	I
1_Deceber_10_2014_30390656	255-1287	1	9	A	B	C	D	E	F	G	H	I
	1317-2346	2	9	A	B	C	D	E	F	G	H	I
	2374-3787	3	8	J	C	D	E	F	G	H	I		1-J
	3818-4847	4	9	A	B	C	D	E	F	G	H	I
1_Deceber_10_2014_32200406	797-1857	1	9	A	B	C	D	E	F	G	H	I
	2256-3215	2	8	B	C	D	E	F	G	H	I
1_Deceber_10_2014_32205515	1200-2280	1	9	A	B	C	D	E	F	G	H	I
1_Deceber_10_2014_32352765	3157-4245	1	9	A	B	C	D	E	F	G	H	I
1_Deceber_10_2014_32362937	186-1140	1	8	B	C	D	E	F	G	H	I
	1165-2194	2	8	A	B	C	D	E	F	G	H	I
1_Deceber_10_2014_33231625	641-1671	1	9	A	B	C	D	E	F	G	H	I
	1702-2732	2	9	A	B	C	D	E	F	G	H	I
	2757-3809	3	9	A	B	C	D	E	F	G	H	I
	4003-4933	4	9	A	B	C	D	E	F	G	H	I
1_Deceber_10_2014_33242062	548-1633	1	9	A	B	C	D	E	F	G	H	I
	1661-2699	2	9	A	B	C	D	E	F	G	H	I
1_Deceber_10_2014_33265937	635-1549	1	8	J	C	D	E	F	G	H	I		1-J
	1583-2619	2	9	A	B	C	D	E	F	G	H	I
1_Deceber_10_2014_33323687	1657-2657	1	9	A	B	C	D	E	F	G	H	I
	2690-3691	2	9	A	B	C	D	E	F	G	H	I
	3728-4743	3	9	A	B	C	D	E	F	G	H	I
1_Deceber_10_2014_33417046	993-2002	1	9	A	B	C	D	E	F	G	H	I
	2031-3051	2	9	A	B	C	D	E	F	G	H	I
	3076-4106	3	9	A	B	C	D	E	F	G	H	I
	4131-5036	4	9	A	B	C	D	E	F	G	H	I
1_Deceber_10_2014_33422125	116-1138	1	9	A	B	C	D	E	F	G	H	I
	2782-3685	2	8	J	C	D	E	F	G	H	I		1-J
	3713-4728	3	9	A	B	C	D	E	F	G	H	I
1_Deceber_10_2014_33805000	1288-2205	1	8	J	C	D	E	F	G	H	I		1-J
	2237-3254	2	9	A	B	C	D	E	F	G	H	I
	3498-4396	3	8	J	C	D	E	F	G	H	I		1-J
1_Deceber_10_2014_33810093	416-1434	1	9	A	B	C	D	E	F	G	H	I
1_Deceber_10_2014_38365578	1251-2449	1	9	A	B	C	D	E	F	G	H	I
	2474-3504	2	9	A	B	C	D	E	F	G	H	I
1_Deceber_10_2014_38444296	754-1676	1	8	B	C	D	E	F	G	H	I
	3009-4005	2	9	A	B	C	D	E	F	G	H	I
	4102-5033	3	8	B	C	D	E	F	G	H	I
1_Deceber_10_2014_38496671	1147-2043	1	8	J	C	D	E	F	G	H	I		1-J
	2070-3063	2	9	A	B	C	D	E	F	G	H	I
	3084-4084	3	9	A	B	C	D	E	F	G	H	I
	4119-5034	4	9	A	B	C	D	E	F	G	H	I
													9
	Total	53	463
Total motif #	53
Total copied syllable #	463
Syllable/Motif	8.73585
Copied syllable type	9
# of motif with repeat	0
# of motif with syntax change	0
# of motif with addition	9

## Sheet: yellow 29
Song File		Duration	Motif	Syllable #	Syllable									Addition	repeat	# total syllable type
3_May_09_2015_32721406	M1	1558-2468	1	8	B	C	D	E	F	G	H	I				9
	M2	2498-3519	2	9	A	B	C	D	E	F	G	H	I
	M3	3554-4582	3	9	A	B	C	D	E	F	G	H	I
3_May_09_2015_33128437	M1	1446-2348	1	8	J	C	D	E	F	G	H	I		1-J
	M2	2387-3390	2	9	A	B	C	D	E	F	G	H	I
3_May_09_2015_33193078	M1	2045-2943	1	8	J	C	D	E	F	G	H	I		1-J
	M2	2971-3976	2	9	A	B	C	D	E	F	G	H	I
	M3	4121-4966	3	7	C	D	E	F	G	H	I
3_May_09_2015_33397750	M1	1172-2065	1	8	J	C	D	E	F	G	H	I		1-J
	M2	2101-3111	2	9	A	B	C	D	E	F	G	H	I
	M3	3142-4156	3	9	A	B	C	D	E	F	G	H	I
3_May_09_2015_33583937	M1	1871-2888	1	9	A	B	C	D	E	F	G	H	I
	M2	2916-3927	2	9	A	B	C	D	E	F	G	H	I
	M3	3963-4977	3	9	A	B	C	D	E	F	G	H	I
3_May_09_2015_33778640	M1	523-1408	1	8	J	C	D	E	F	G	H	I		1-J
	M2	1436-2447	2	9	A	B	C	D	E	F	G	H	I
3_May_09_2015_34001312	M1	763-1795	1	9	A	B	C	D	E	F	G	H	I
	M2	2070-2981	2	8	J	C	D	E	F	G	H	I		1-J
	M3	3006-4045	3	9	A	B	C	D	E	F	G	H	I
3_May_09_2015_37022703	M1	95-1135	1	9	A	B	C	D	E	F	G	H	I
	M2	1461-2372	2	8	J	C	D	E	F	G	H	I		1-J
	M3	2397-3439	3	9	A	B	C	D	E	F	G	H	I
	M4	3881-4795	4	8	J	C	D	E	F	G	H	I		1-J
3_May_09_2015_37607546	M1	868-1912	1	9	A	B	C	D	E	F	G	H	I
	M2	2763-3679	2	8	J	C	D	E	F	G	H	I		1-J
	M3	3710-4767	3	9	A	B	C	D	E	F	G	H	I
3_May_09_2015_37877953	M1	538-1441	1	8	J	C	D	E	F	G	H	I		1-J
	M2	1475-2512	2	9	A	B	C	D	E	F	G	H	I
	M3	3101-4005	3	8	J	C	D	E	F	G	H	I		1-J
3_May_09_2015_37986156	M1	719-1644	1	8	J	C	D	E	F	G	H	I		1-J
	M2	1677-2704	2	9	A	B	C	D	E	F	G	H	I
	M3	2734-3778	3	9	A	B	C	D	E	F	G	H	I
3_May_09_2015_38458890	M1	728-1615	1	8	J	C	D	E	F	G	H	I		1-J
	M2	1958-2868	2	8	J	C	D	E	F	G	H	I		1-J
	M3	2898-3926	3	9	A	B	C	D	E	F	G	H	I
3_May_09_2015_39812203	M1	1989-2910	1	8	J	C	D	E	F	G	H	I		1-J
	M2	2943-4004	2	9	A	B	C	D	E	F	G	H	I
3_May_09_2015_39941578	M1	6-932	1	8	B	C	D	E	F	G	H	I
	M2	960-1980	2	9	A	B	C	D	E	F	G	H	I
3_May_09_2015_40381531	M1	680-1586	1	8	J	C	D	E	F	G	H	I		1-J
	M2	1631-2635	2	9	A	B	C	D	E	F	G	H	I
	M3	3274-4076	3	7	C	D	E	F	G	H	I
3_May_09_2015_40520531	M1	2136-3056	1	8	B	C	D	E	F	G	H	I
	M2	3088-4109	2	9	A	B	C	D	E	F	G	H	I
3_May_09_2015_42715562	M1	256-1140	1	8	J	C	D	E	F	G	H	I		1-J
	M2	1173-2197	2	9	A	B	C	D	E	F	G	H	I
3_May_09_2015_42753421	M1	490-1427	1	8	B	C	D	E	F	G	H	I
	M2	1463-2493	2	9	A	B	C	D	E	F	G	H	I
	M3	3744-4645	3	8	J	C	D	E	F	G	H	I		1-J
3_May_09_2015_42806234	M1	1046-1937	1	8	J	C	D	E	F	G	H	I		1-J
	M2	1973-2982	2	9	A	B	C	D	E	F	G	H	I
	M3	3007-4015	3	9	A	B	C	D	E	F	G	H	I
	M4	4051-5038	4	9	A	B	C	D	E	F	G	H	I
3_May_09_2015_42811781	M1	1564-2551	1	9	A	B	C	D	E	F	G	H	I
	M2	3758-4654	2	8	J	C	D	E	F	G	H	I		1-J
		total	54	468										19
		Total motif #	54
		Total copied syllable #	468
		Syllable/Motif	8.66667
		Copied syllable type	9
		# of motif with repeat	0
		# of motif with syntax change	0
		# of motif with addition	19

[truncated: 11 more sheets: blue 59, yellow 37, black 45-2nd, yellow 14, yellow 30, green 68, green 13, grey 147, black-33-2nd, grey 146, yellow 33]
