# Supplementary material for: miR-9 regulates basal ganglia-dependent developmental vocal learning and adult vocal performance in songbirds
Source: eLife journal article supplement (doi:10.7554/elife.29087), 2018-01-18
Supplement: supp [file elife-29087-supp-v1.zip › elife_poa_e29087_Figure_3_source_data_1.xlsx]

## Sheet: summary
non injection	similarity score (%)		control	similarity score (%)		miR-9	similarity score (%)
yellow 2	86.6542		grey 140	86.645		grey 139	51.27
yellow 3	84.8299		grey 147	85.04		grey 146	49.48
yellow 9	85.54		grey 180	83.805		yellow 14	64.64
yellow 39	88.3918		yellow 16	87.64		yellow 23	68.405
			yellow 29	82.54		yellow 30	63.07
			yellow 37	82.36		yellow 33	56.965
mean	86.354			85.7825			58.4487
S.E.	0.78			0.88			3.12

## Sheet: grey 139 vs blue 63
blue 63	blue 63-duration	song file-grey 139	duration-grey 139	% similarity	accuarcy	% sequential	Pitch diff	FM diff	Entropy diff	Goodness diff	AM diff
1_June_29_2012_30198093	2391-3239	30733031	2237-2913	58	65.68	49.41	1.443	1.588	4.068	5.867	1.185
1_June_29_2012_30198093	2391-3239	30903968	1991-2634	47	69.5	63.05	1.519	1.716	3.265	5.944	1.091
1_June_29_2012_30198093	2391-3239	30970546	2271-2909	47	66.39	57.89	3.198	1.276	0.156	1.05	3.143
1_June_29_2012_30198093	2391-3239	31215421	1060-1718	56	66.04	52.94	2.658	1.03	0.131	1.315	3.8
1_June_29_2012_30198093	2391-3239	31394937	1000-1641	63	67.1	42.82	3.139	1.379	0.165	1.096	3.182
1_June_29_2012_30198093	2391-3239	31488984	1303-1951	48	66.6	58.82	2.911	1.314	0.167	1.114	3.177
1_June_29_2012_30198093	2391-3239	32388953	4207-4858	55	68.68	45.17	2.872	1.187	0.143	1.22	3.345
1_June_29_2012_30198093	2391-3239	32966906	1107-1763	53	67.17	64.81	2.886	1.222	0.153	1.061	3.21
1_June_29_2012_30198093	2391-3239	33060703	2180-2841	59	68.13	45.88	2.76	1.086	0.129	1.298	3.847
1_June_29_2012_30198093	2391-3239	33191109	2438-3093	50	63.86	54.37	2.76	1.448	0.182	1.108	3.075
1_June_29_2012_30198093	2391-3239	33244968	1336-1988	59	65.64	55.93	2.895	1.1	0.126	1.108	3.142
1_June_29_2012_30198093	2391-3239	33432953	1037-1687	50	70.53	62.34	2.831	1.161	0.141	1.205	3.323
1_June_29_2012_30198093	2391-3239	33492156	884-1532	50	65.65	51.05	2.507	1.02	0.135	1.113	2.875
1_June_29_2012_30198093	2391-3239	33548218	752-1408	57	68.38	56	2.803	1.224	0.14	1.145	3.35
1_June_29_2012_30198093	2391-3239	33693968	3349-4000	43	65.96	57.67	2.913	1.243	0.157	1.216	2.823
1_June_29_2012_30198093	2391-3239	38043015	1285-1933	58	67.94	59.29	2.779	1.1	0.132	1.179	3.301
1_June_29_2012_30198093	2391-3239	39322359	1556-2210	47	65.32	66.58	2.78	1.467	0.26	1.255	3.315
1_June_29_2012_30198093	2391-3239	39457000	904-1574	46	70	59.17	2.672	1.202	0.134	1.226	3.411
1_June_29_2012_30198093	2391-3239	39501968	1119-1768	58	65.94	48.41	2.586	1.215	0.175	1.229	3.01
1_June_29_2012_30198093	2391-3239	39613656	2573-3212	57	66.56	63.91	2.726	1.144	0.161	1.148	3.063
1_June_29_2012_30493296	3559-4423	30733031	2237-2907	34	68.34	68.22	3.104	1.392	0.223	1.186	3.241
1_June_29_2012_30493296	3559-4423	30903968	1990-2634	43	64.92	62.14	3.22	1.34	0.207	1.167	3.553
1_June_29_2012_30493296	3559-4423	30970546	2271-2919	43	66.68	60.28	3.111	1.432	0.224	1.091	3.256
1_June_29_2012_30493296	3559-4423	31215421	1060-1720	43	66.27	73.13	2.76	1.212	0.206	1.262	3.905
1_June_29_2012_30493296	3559-4423	31394937	999-1648	41	66.82	64.95	3.147	1.541	0.23	1.149	3.273
1_June_29_2012_30493296	3559-4423	31488984	1303-1963	38	65.4	76.16	2.928	1.467	0.231	1.152	3.297
1_June_29_2012_30493296	3559-4423	32388953	4212-4854	40	64.64	78.24	2.907	1.36	0.211	1.205	3.437
1_June_29_2012_30493296	3559-4423	32966906	1109-1757	49	63.48	54.43	2.927	1.38	0.217	1.1	3.27
1_June_29_2012_30493296	3559-4423	33060703	2183-2848	42	66.12	60.2	2.907	1.273	0.204	1.239	3.924
1_June_29_2012_30493296	3559-4423	33191109	2439-3098	36	66.65	67.75	2.764	1.595	0.248	1.265	3.17
1_June_29_2012_30493296	3559-4423	33244968	1336-1988	47	67.7	66.35	2.896	1.27	0.199	1.17	3.253
1_June_29_2012_30493296	3559-4423	33432953	1037-1687	51	66.38	52.33	2.874	1.325	0.209	1.212	3.435
1_June_29_2012_30493296	3559-4423	33492156	884-1532	31	66.33	73.36	2.677	1.211	0.205	1.245	2.982
1_June_29_2012_30493296	3559-4423	33548218	752-1408	45	69.12	56.07	2.824	1.392	0.212	1.151	3.451
1_June_29_2012_30493296	3559-4423	33693968	3349-4000	35	64.27	66.91	2.98	1.404	0.227	1.294	2.914
1_June_29_2012_30493296	3559-4423	38043015	1285-1933	47	67.57	67.28	2.798	1.273	0.205	1.216	3.393
1_June_29_2012_30493296	3559-4423	39322359	1556-2210	31	65.03	79.43	2.899	1.633	0.322	1.244	3.398
1_June_29_2012_30493296	3559-4423	39457000	904-1574	43	66.57	76.63	2.758	1.38	0.207	1.22	3.523
1_June_29_2012_30493296	3559-4423	39501968	1119-1768	48	66.11	53.5	2.723	1.381	0.244	1.272	3.109
1_June_29_2012_30493296	3559-4423	39613656	2573-3212	34	66.09	67.99	2.806	1.321	0.231	1.183	3.137
1_June_29_2012_32519515	1194-2079	30733031	2237-2907	70	69.1	39.24	2.978	1.263	0.145	0.925	2.836
1_June_29_2012_32519515	1194-2079	30903968	1990-2634	56	66.82	59.99	3.096	1.21	0.128	1.055	3.141
1_June_29_2012_32519515	1194-2079	30970546	2271-2919	53	69	56.89	2.996	1.277	0.146	0.858	2.841
1_June_29_2012_32519515	1194-2079	31215421	1060-1720	63	66.88	48	2.624	1.143	0.127	1.174	3.5
1_June_29_2012_32519515	1194-2079	31394937	999-1648	53	66.56	58.72	3.02	1.363	0.153	0.903	2.885
1_June_29_2012_32519515	1194-2079	31488984	1303-1963	65	68.81	46.18	2.802	1.324	0.153	0.922	2.874
1_June_29_2012_32519515	1194-2079	32388953	4212-4854	54	65.9	49.95	2.786	1.241	0.133	1.041	3.018
1_June_29_2012_32519515	1194-2079	32966906	1109-1757	62	66.42	51.19	2.796	1.221	0.139	0.865	2.859
1_June_29_2012_32519515	1194-2079	33060703	2183-2848	58	67.54	75.82	2.752	1.208	0.125	1.158	3.547
1_June_29_2012_32519515	1194-2079	33191109	2439-3098	54	67.31	56.67	2.652	1.404	0.171	0.853	2.734
1_June_29_2012_32519515	1194-2079	33244968	1336-1988	75	66.75	59.17	2.77	1.143	0.121	0.903	2.833
1_June_29_2012_32519515	1194-2079	33432953	1037-1687	59	66.79	57.81	2.749	1.217	0.131	1.02	3.028
1_June_29_2012_32519515	1194-2079	33492156	884-1532	52	67.13	70.8	2.533	1.107	0.126	0.868	2.58
1_June_29_2012_32519515	1194-2079	33548218	752-1408	66	66.85	62.59	2.692	1.263	0.133	0.968	3.043
1_June_29_2012_32519515	1194-2079	33693968	3349-4000	63	65.62	61.91	2.833	1.265	0.149	1.001	2.552
1_June_29_2012_32519515	1194-2079	38043015	1285-1933	57	63.78	64.42	2.672	1.17	0.127	0.991	3.002
1_June_29_2012_32519515	1194-2079	39322359	1556-2210	63	63.15	50.28	2.759	1.473	0.244	1.085	3.001
1_June_29_2012_32519515	1194-2079	39457000	904-1574	64	66.56	59.17	2.628	1.272	0.129	1.058	3.127
1_June_29_2012_32519515	1194-2079	39501968	1119-1768	65	63.39	46.86	2.583	1.244	0.165	1.033	2.719
1_June_29_2012_32519515	1194-2079	39613656	2573-3212	70	65.1	50.05	2.667	1.201	0.153	0.965	2.743
1_June_29_2012_32846843	301-1176	30733031	2237-2907	50	67.55	63.21	3.159	1.248	0.144	1.079	2.986
1_June_29_2012_32846843	301-1176	30903968	1990-2634	52	68.67	65.12	3.297	1.206	0.129	1.174	3.337
1_June_29_2012_32846843	301-1176	30970546	2271-2919	40	65.27	80.36	3.242	1.252	0.145	1.008	3.019
1_June_29_2012_32846843	301-1176	31215421	1060-1720	63	69.58	56.12	2.701	1.145	0.129	1.281	3.684
1_June_29_2012_32846843	301-1176	31394937	999-1648	57	66.95	63.51	3.212	1.344	0.15	1.056	3.042
1_June_29_2012_32846843	301-1176	31488984	1303-1963	53	65.34	55.88	2.944	1.294	0.15	1.072	3.06
1_June_29_2012_32846843	301-1176	32388953	4212-4854	65	65.36	43.87	2.93	1.24	0.132	1.176	3.214
1_June_29_2012_32846843	301-1176	32966906	1109-1757	57	66.82	51.33	2.937	1.209	0.136	1.016	3.078
1_June_29_2012_32846843	301-1176	33060703	2183-2848	58	69.16	59.35	2.804	1.213	0.127	1.264	3.722
1_June_29_2012_32846843	301-1176	33191109	2439-3098	58	66.57	61.24	2.806	1.364	0.168	1.052	2.943
1_June_29_2012_32846843	301-1176	33244968	1336-1988	62	67.72	53.34	2.946	1.137	0.122	1.066	3.034
1_June_29_2012_32846843	301-1176	33432953	1037-1687	61	66.58	50.57	2.893	1.21	0.13	1.16	3.2
1_June_29_2012_32846843	301-1176	33492156	884-1532	51	68.31	54.27	2.55	1.105	0.126	1.06	2.758
1_June_29_2012_32846843	301-1176	33548218	752-1408	60	66.16	59.35	2.857	1.25	0.133	1.1	3.214
1_June_29_2012_32846843	301-1176	33693968	3349-4000	53	65.75	51.96	2.963	1.243	0.149	1.166	2.688
1_June_29_2012_32846843	301-1176	38043015	1285-1933	56	69.08	56.58	2.83	1.161	0.128	1.14	3.176
1_June_29_2012_32846843	301-1176	39322359	1556-2210	47	62.39	61.43	2.823	1.451	0.239	1.217	3.192
1_June_29_2012_32846843	301-1176	39457000	904-1574	66	64.43	55.88	2.742	1.267	0.13	1.192	3.299
1_June_29_2012_32846843	301-1176	39501968	1119-1768	48	66.36	63.27	2.624	1.227	0.164	1.184	2.907
1_June_29_2012_32846843	301-1176	39613656	2573-3212	51	66.53	57.83	2.776	1.188	0.152	1.107	2.932
1_June_29_2012_33464640	1012-1865	30733031	2237-2907	57	66.22	61.75	2.967	1.257	0.235	1.065	3.01
1_June_29_2012_33464640	1012-1865	30903968	1990-2634	47	68.41	57.56	3.107	1.213	0.227	1.134	3.339
1_June_29_2012_33464640	1012-1865	30970546	2271-2919	49	64.96	61.62	3.041	1.261	0.237	0.982	3.026
1_June_29_2012_33464640	1012-1865	31215421	1060-1720	64	66.47	50.65	2.532	1.143	0.233	1.233	3.668
1_June_29_2012_33464640	1012-1865	31394937	999-1648	59	66.93	62.09	3.001	1.346	0.24	1.037	3.067
1_June_29_2012_33464640	1012-1865	31488984	1303-1963	51	63.47	52.32	2.768	1.314	0.238	1.047	3.069
1_June_29_2012_33464640	1012-1865	32388953	4212-4854	58	64.58	49.94	2.739	1.243	0.224	1.144	3.231
1_June_29_2012_33464640	1012-1865	32966906	1109-1757	47	65.7	61.38	2.758	1.218	0.223	0.995	3.087
1_June_29_2012_33464640	1012-1865	33060703	2183-2848	62	66.59	44.45	2.66	1.218	0.23	1.215	3.711
1_June_29_2012_33464640	1012-1865	33191109	2439-3098	53	64.18	58.52	2.623	1.379	0.258	1.055	2.95
1_June_29_2012_33464640	1012-1865	33244968	1336-1988	50	63.53	58.76	2.749	1.142	0.222	1.048	3.047
1_June_29_2012_33464640	1012-1865	33432953	1037-1687	59	63.28	60.9	2.702	1.215	0.224	1.133	3.206
1_June_29_2012_33464640	1012-1865	33492156	884-1532	43	67.68	60.19	2.384	1.107	0.221	1.059	2.763
1_June_29_2012_33464640	1012-1865	33548218	752-1408	47	66.03	55.18	2.671	1.256	0.23	1.072	3.227
1_June_29_2012_33464640	1012-1865	33693968	3349-4000	48	64.92	57.56	2.769	1.254	0.245	1.155	2.723
1_June_29_2012_33464640	1012-1865	38043015	1285-1933	46	66.23	66.15	2.651	1.171	0.228	1.117	3.193
1_June_29_2012_33464640	1012-1865	39322359	1556-2210	53	64.87	56.85	2.652	1.458	0.321	1.183	3.199
1_June_29_2012_33464640	1012-1865	39457000	904-1574	64	66.4	42.91	2.557	1.269	0.232	1.155	3.313
1_June_29_2012_33464640	1012-1865	39501968	1119-1768	52	68.56	63.28	2.456	1.23	0.259	1.162	2.9
1_June_29_2012_33464640	1012-1865	39613656	2573-3212	54	66.91	69.01	2.59	1.195	0.248	1.084	2.931
1_June_29_2012_34453812	3675-4522	30733031	2237-2907	60	67.44	39.52	3.037	1.261	0.19	1.011	2.853
1_June_29_2012_34453812	3675-4522	30903968	1990-2634	54	69.19	55	3.152	1.225	0.178	1.116	3.201
1_June_29_2012_34453812	3675-4522	30970546	2271-2919	59	66.16	61.46	3.036	1.254	0.191	0.94	2.904
1_June_29_2012_34453812	3675-4522	31215421	1060-1720	51	69.97	51.42	2.67	1.191	0.18	1.226	3.564
1_June_29_2012_34453812	3675-4522	31394937	999-1648	52	68.39	52.61	3.07	1.329	0.195	0.983	2.927
1_June_29_2012_34453812	3675-4522	31488984	1303-1963	69	64.1	51.9	2.855	1.31	0.195	1.005	2.931
1_June_29_2012_34453812	3675-4522	32388953	4212-4854	63	68.36	47.85	2.829	1.259	0.177	1.12	3.095
1_June_29_2012_34453812	3675-4522	32966906	1109-1757	67	65.94	37.45	2.84	1.216	0.179	0.951	2.97
1_June_29_2012_34453812	3675-4522	33060703	2183-2848	49	70.39	55.71	2.803	1.262	0.177	1.211	3.606
1_June_29_2012_34453812	3675-4522	33191109	2439-3098	52	66.02	52.85	2.69	1.351	0.213	0.969	2.819
1_June_29_2012_34453812	3675-4522	33244968	1336-1988	64	66.12	41.26	2.821	1.148	0.171	0.993	2.895
1_June_29_2012_34453812	3675-4522	33432953	1037-1687	61	64.29	40.95	2.798	1.234	0.177	1.098	3.075
1_June_29_2012_34453812	3675-4522	33492156	884-1532	45	68.38	79.28	2.589	1.138	0.173	0.981	2.636
1_June_29_2012_34453812	3675-4522	33548218	752-1408	62	68.2	43.79	2.749	1.272	0.181	1.042	3.107
1_June_29_2012_34453812	3675-4522	33693968	3349-4000	52	63.26	70.95	2.885	1.259	0.196	1.097	2.606
1_June_29_2012_34453812	3675-4522	38043015	1285-1933	55	68.88	49.52	2.731	1.192	0.178	1.072	3.055
1_June_29_2012_34453812	3675-4522	39322359	1556-2210	55	67.36	50.31	2.822	1.45	0.282	1.157	3.047
1_June_29_2012_34453812	3675-4522	39457000	904-1574	53	67.89	63.8	2.683	1.291	0.181	1.124	3.171
1_June_29_2012_34453812	3675-4522	39501968	1119-1768	47	66.51	62.85	2.641	1.245	0.212	1.12	2.778
1_June_29_2012_34453812	3675-4522	39613656	2573-3212	52	66.54	50.71	3.003	1.207	0.199	1.004	2.608
1_June_29_2012_39787500	2774-3600	30733031	2237-2907	55	66.03	48.58	3.118	1.312	0.2	1.09	3.123
1_June_29_2012_39787500	2774-3600	30903968	1990-2634	41	66.71	74.5	3.252	1.254	0.187	1.152	3.434
1_June_29_2012_39787500	2774-3600	30970546	2271-2919	40	65.25	71.56	3.193	1.352	0.201	1.016	3.172
1_June_29_2012_39787500	2774-3600	31215421	1060-1720	63	65.55	63.03	2.677	1.141	0.189	1.264	3.795
1_June_29_2012_39787500	2774-3600	31394937	999-1648	40	69.43	63.79	3.161	1.46	0.206	1.068	3.186
1_June_29_2012_39787500	2774-3600	31488984	1303-1963	51	67.72	51.96	2.923	1.395	0.206	1.075	3.181
1_June_29_2012_39787500	2774-3600	32388953	4212-4854	33	66.63	74.78	2.887	1.285	0.188	1.174	3.35
1_June_29_2012_39787500	2774-3600	32966906	1109-1757	49	62.91	65.44	2.905	1.306	0.191	1.022	3.214
1_June_29_2012_39787500	2774-3600	33060703	2183-2848	53	68.91	43.87	2.776	1.2	0.186	1.249	3.852
1_June_29_2012_39787500	2774-3600	33191109	2439-3098	36	66.5	74.26	2.772	1.519	0.224	1.095	3.097
1_June_29_2012_39787500	2774-3600	33244968	1336-1988	55	65.56	49.5	2.917	1.193	0.181	1.075	3.139
1_June_29_2012_39787500	2774-3600	33432953	1037-1687	49	63.35	55.52	2.848	1.249	0.187	1.16	3.345
1_June_29_2012_39787500	2774-3600	33492156	884-1532	47	64.88	54.16	2.516	1.125	0.183	1.091	2.891
1_June_29_2012_39787500	2774-3600	33548218	752-1408	60	66.67	48.52	2.821	1.315	0.191	1.101	3.356
1_June_29_2012_39787500	2774-3600	33693968	3349-4000	27	63.96	78.18	2.908	1.329	0.206	1.184	2.864
1_June_29_2012_39787500	2774-3600	38043015	1285-1933	48	65.46	73.03	2.801	1.201	0.187	1.144	3.3
1_June_29_2012_39787500	2774-3600	39322359	1556-2210	48	66.16	78.92	2.802	1.555	0.295	1.213	3.297
1_June_29_2012_39787500	2774-3600	39457000	904-1574	57	68.33	45.83	2.701	1.3	0.19	1.185	3.444
1_June_29_2012_39787500	2774-3600	39501968	1119-1768	55	66.8	48.03	2.592	1.304	0.222	1.193	3.043
1_June_29_2012_39787500	2774-3600	39613656	2573-3212	55	65	59.31	2.738	1.245	0.21	1.116	3.048
1_June_29_2012_39889718	1708-2553	30733031	2237-2907	41	68.62	64.49	3.046	1.287	0.128	1.152	3.287
1_June_29_2012_39889718	1708-2553	30903968	1990-2634	46	67.72	70.28	3.176	1.222	0.106	1.167	3.593
1_June_29_2012_39889718	1708-2553	30970546	2271-2919	50	68.3	61.35	3.107	1.344	0.128	1.06	3.297
1_June_29_2012_39889718	1708-2553	31215421	1060-1720	44	66.6	59.9	2.648	1.085	0.103	1.27	3.956
1_June_29_2012_39889718	1708-2553	31394937	999-1648	48	69.47	66.9	3.084	1.45	0.136	1.121	3.341
1_June_29_2012_39889718	1708-2553	31488984	1303-1963	45	64.31	70.28	2.864	1.379	0.138	1.123	3.323
1_June_29_2012_39889718	1708-2553	32388953	4212-4854	54	68.55	54.99	2.836	1.25	0.115	1.197	3.498
1_June_29_2012_39889718	1708-2553	32966906	1109-1757	53	64.6	63.28	2.845	1.289	0.124	1.071	3.348
1_June_29_2012_39889718	1708-2553	33060703	2183-2848	58	65.25	46.13	2.762	1.139	0.101	1.248	3.992
1_June_29_2012_39889718	1708-2553	33191109	2439-3098	38	69.46	65.7	2.699	1.519	0.153	1.197	3.235
1_June_29_2012_39889718	1708-2553	33244968	1336-1988	53	64.98	48.3	2.83	1.164	0.098	1.136	3.316
1_June_29_2012_39889718	1708-2553	33432953	1037-1687	56	65.09	80.46	2.795	1.213	0.112	1.196	3.488
1_June_29_2012_39889718	1708-2553	33492156	884-1532	48	64.98	64.49	2.515	1.088	0.106	1.186	3.042
1_June_29_2012_39889718	1708-2553	33548218	752-1408	57	67.5	49.3	2.753	1.285	0.113	1.137	3.507
1_June_29_2012_39889718	1708-2553	33693968	3349-4000	31	71.57	72.49	2.872	1.307	0.128	1.254	2.999
1_June_29_2012_39889718	1708-2553	38043015	1285-1933	56	67.19	65.21	2.734	1.166	0.104	1.193	3.467
1_June_29_2012_39889718	1708-2553	39322359	1556-2210	42	66.06	60.38	2.791	1.543	0.234	1.231	3.409
1_June_29_2012_39889718	1708-2553	39457000	904-1574	53	66.02	64.49	2.661	1.26	0.106	1.209	3.584
1_June_29_2012_39889718	1708-2553	39501968	1119-1768	38	63.71	65.21	2.578	1.275	0.146	1.239	3.177
1_June_29_2012_39889718	1708-2553	39613656	2573-3212	45	66.56	79.95	2.699	1.211	0.133	1.161	3.194
1_June_29_2012_40247484	3313-4138	30733031	2237-2907	59	63.7	44.94	2.955	1.438	0.316	0.973	2.878
1_June_29_2012_40247484	3313-4138	30903968	1990-2634	44	66.52	57.61	3.325	1.387	0.317	0.974	3.106
1_June_29_2012_40247484	3313-4138	30970546	2271-2919	48	67.42	56.11	3.103	1.459	0.326	0.929	2.957
1_June_29_2012_40247484	3313-4138	31215421	1060-1720	45	65.06	64.92	2.794	1.313	0.313	1.146	3.496
1_June_29_2012_40247484	3313-4138	31394937	999-1648	53	67.6	56.63	2.819	1.423	0.305	0.961	2.888
1_June_29_2012_40247484	3313-4138	31488984	1303-1963	56	64.66	56.88	3.001	1.39	0.312	0.977	2.876
1_June_29_2012_40247484	3313-4138	32388953	4212-4854	57	67.41	51.03	2.978	1.391	0.302	1.047	2.866
1_June_29_2012_40247484	3313-4138	32966906	1109-1757	53	64.86	51.52	2.916	1.267	0.29	0.872	2.976
1_June_29_2012_40247484	3313-4138	33060703	2183-2848	63	64.74	59.8	2.85	1.418	0.316	1.115	3.418
1_June_29_2012_40247484	3313-4138	33191109	2439-3098	68	68.2	40.07	2.766	1.334	0.32	0.926	2.79
1_June_29_2012_40247484	3313-4138	33244968	1336-1988	60	65.55	47.86	2.784	1.301	0.311	0.954	2.788
1_June_29_2012_40247484	3313-4138	33432953	1037-1687	55	67.27	48.35	2.965	1.325	0.306	1.155	3.031
1_June_29_2012_40247484	3313-4138	33492156	884-1532	35	68.72	65.4	2.752	1.258	0.322	0.892	2.595
1_June_29_2012_40247484	3313-4138	33548218	752-1408	59	65.84	38.85	2.846	1.355	0.313	0.953	3.003
1_June_29_2012_40247484	3313-4138	33693968	3349-4000	61	62.94	40.8	2.828	1.307	0.324	1.019	2.63
1_June_29_2012_40247484	3313-4138	38043015	1285-1933	55	63.95	45.31	2.938	1.333	0.321	1.02	2.993
1_June_29_2012_40247484	3313-4138	39322359	1556-2210	44	69.14	67.6	2.913	1.46	0.338	1.081	2.907
1_June_29_2012_40247484	3313-4138	39457000	904-1574	54	66.65	44.45	2.999	1.399	0.321	1.144	3.155
1_June_29_2012_40247484	3313-4138	39501968	1119-1768	51	65.64	52.74	2.825	1.292	0.325	1.052	2.696
1_June_29_2012_40247484	3313-4138	39613656	2573-3212	51	66.24	54.93	2.936	1.354	0.342	0.958	2.623
1_June_29_2012_42635281	2621-3460	30733031	2237-2907	37	68.56	70.51	2.87	1.283	0.145	1.231	3.518
1_June_29_2012_42635281	2621-3460	30903968	1990-2634	40	68.74	70.67	3.302	1.24	0.143	1.197	3.752
1_June_29_2012_42635281	2621-3460	30970546	2271-2919	35	65.9	64.8	3.05	1.426	0.15	1.199	3.612
1_June_29_2012_42635281	2621-3460	31215421	1060-1720	57	67.3	55.41	2.643	1.014	0.124	1.324	4.154
1_June_29_2012_42635281	2621-3460	31394937	999-1648	50	66.19	52.43	2.662	1.359	0.138	1.254	3.54
1_June_29_2012_42635281	2621-3460	31488984	1303-1963	38	64.49	78.12	2.911	1.294	0.156	1.239	3.53
1_June_29_2012_42635281	2621-3460	32388953	4212-4854	50	66.21	61.23	2.838	1.244	0.132	1.279	3.533
1_June_29_2012_42635281	2621-3460	32966906	1109-1757	46	65.16	58.89	2.801	1.133	0.134	1.121	3.581
1_June_29_2012_42635281	2621-3460	33060703	2183-2848	49	69.77	58.43	2.661	1.104	0.116	1.282	4.066
1_June_29_2012_42635281	2621-3460	33191109	2439-3098	35	65.71	62.18	2.666	1.223	0.136	1.288	3.456
1_June_29_2012_42635281	2621-3460	33244968	1336-1988	46	66.8	73.12	2.694	1.162	0.126	1.246	3.415
1_June_29_2012_42635281	2621-3460	33432953	1037-1687	43	67.18	59.57	2.868	1.138	0.132	1.336	3.677
1_June_29_2012_42635281	2621-3460	33492156	884-1532	39	69.15	57.19	2.576	1.103	0.145	1.27	3.246
1_June_29_2012_42635281	2621-3460	33548218	752-1408	49	67.37	63.71	2.754	1.213	0.125	1.182	3.679
1_June_29_2012_42635281	2621-3460	33693968	3349-4000	33	66.14	71.22	2.695	1.09	0.137	1.313	3.268
1_June_29_2012_42635281	2621-3460	38043015	1285-1933	49	66.79	48.63	2.846	1.168	0.131	1.274	3.657
1_June_29_2012_42635281	2621-3460	39322359	1556-2210	42	66.2	64.09	2.746	1.34	0.189	1.297	3.574
1_June_29_2012_42635281	2621-3460	39457000	904-1574	59	68.45	31.74	2.91	1.118	0.118	1.302	3.816
1_June_29_2012_42635281	2621-3460	39501968	1119-1768	32	61.91	75.26	2.62	1.162	0.14	1.322	3.344
1_June_29_2012_42635281	2621-3460	39613656	2573-3212	39	67.56	69.83	2.846	1.214	0.168	1.23	3.284
			average	51.27

## Sheet: grey 140 vs blue 68
Turor-blue 68	blue 68-duration	grey 140	grey 140-duration	% similarity	accuarcy	% sequential	Pitch diff	FM diff	Entropy diff	Goodness diff	AM diff
1_July_22_2014_36094515	637-1631	28805500	1536-2534	93	82.49	90.29	0.809	1.653	1.671	4.002	1.25
1_July_22_2014_36094515	637-1631	29346593	2397-3409	88	83.98	100	0.933	1.77	1.715	4.228	1.332
1_July_22_2014_36094515	637-1631	29378859	1924-2926	90	80.92	86.82	0.842	1.692	1.824	4.27	1.354
1_July_22_2014_36094515	637-1631	29728046	895-1851	84	85.05	100	0.894	1.83	1.7	4.105	1.366
1_July_22_2014_36094515	637-1631	29768968	894-1863	82	85.12	100	0.97	1.78	1.804	4.042	1.353
1_July_22_2014_36094515	637-1631	30534171	1965-2937	88	81.62	95.43	0.931	1.75	1.76	3.978	1.351
1_July_22_2014_36094515	637-1631	31846515	2504-3479	84	83.81	54.7	0.815	1.714	1.636	4.006	1.327
1_July_22_2014_36094515	637-1631	32024437	2915-3888	88	80.66	96.19	1.008	1.758	1.874	4.134	1.379
1_July_22_2014_36094515	637-1631	32556625	469-1435	85	83.34	94.86	0.917	1.768	1.768	4.093	1.355
1_July_22_2014_36094515	637-1631	33387781	1709-2669	85	86.15	100	0.902	1.891	1.828	3.962	1.397
1_July_22_2014_36094515	637-1631	33939187	1963-2916	83	83.5	95.24	0.919	1.77	1.783	4.119	1.366
1_July_22_2014_36094515	637-1631	34920078	2018-2976	93	83.54	82.12	0.827	1.707	1.659	3.992	1.302
1_July_22_2014_36094515	637-1631	35213406	229-1166	79	80.41	92.38	1.045	1.734	2.168	3.944	1.422
1_July_22_2014_36094515	637-1631	38011562	1966-2975	79	77.06	81.54	0.885	1.781	2.095	4.224	1.324
1_July_22_2014_36094515	637-1631	38063546	1235-2243	86	83.03	68.79	0.925	1.778	1.892	4.056	1.294
1_July_22_2014_36094515	637-1631	38191048	217-1216	83	81.91	100	0.995	1.809	1.944	3.978	1.357
1_July_22_2014_36094515	637-1631	38244671	739-1729	83	83.08	100	0.99	1.811	1.99	4.225	1.392
1_July_22_2014_36094515	637-1631	38293906	2451-3442	81	83.08	94.67	1.011	1.777	1.936	4.266	1.274
1_July_22_2014_36094515	637-1631	38313734	980-1965	88	83.81	69.36	0.817	1.593	1.763	3.951	1.279
1_July_22_2014_36094515	637-1631	38345375	816-1804	91	85.5	100	0.844	1.744	1.834	4.059	1.29
1_July_22_2014_36105125	1944-2936	28805500	1536-2534	89	84.69	100	0.89	1.83	1.567	4.316	1.375
1_July_22_2014_36105125	1944-2936	29346593	2397-3409	82	85.18	100	0.918	1.772	1.803	4.175	1.32
1_July_22_2014_36105125	1944-2936	29378859	1924-2926	85	85.47	100	0.9	1.746	1.681	4.109	1.319
1_July_22_2014_36105125	1944-2936	29728046	895-1851	90	83.75	90.52	0.813	1.49	1.578	4.005	1.268
1_July_22_2014_36105125	1944-2936	29768968	894-1863	76	83.33	55.12	0.948	1.607	1.623	4.307	1.352
1_July_22_2014_36105125	1944-2936	30534171	1965-2937	73	83.42	70.21	0.905	1.623	1.76	4.044	1.315
1_July_22_2014_36105125	1944-2936	31846515	2504-3479	78	84.3	60.34	0.911	1.662	1.61	4.159	1.384
1_July_22_2014_36105125	1944-2936	32024437	2915-3888	88	84.86	69.82	0.992	1.612	1.72	4.105	1.371
1_July_22_2014_36105125	1944-2936	32556625	469-1435	78	85.74	100	1.028	1.604	1.434	4.091	1.335
1_July_22_2014_36105125	1944-2936	33387781	1709-2669	87	86.44	90.52	0.885	1.519	1.635	4.088	1.413
1_July_22_2014_36105125	1944-2936	33939187	1963-2916	85	83.06	76.98	1.039	1.586	1.808	4.198	1.4
1_July_22_2014_36105125	1944-2936	34920078	2018-2976	89	84.22	100	0.945	1.586	1.627	4.21	1.407
1_July_22_2014_36105125	1944-2936	35213406	229-1166	87	85.03	76.98	0.92	1.725	1.725	4.021	1.417
1_July_22_2014_36105125	1944-2936	38011562	1966-2975	84	85.38	96.13	0.935	1.601	1.694	4.183	1.383
1_July_22_2014_36105125	1944-2936	38063546	1235-2243	85	81.84	96.13	0.848	1.542	1.58	4.047	1.319
1_July_22_2014_36105125	1944-2936	38191046	217-1216	78	85.38	74.46	1.067	1.568	2.098	3.957	1.442
1_July_22_2014_36105125	1944-2936	38244671	739-1729	87	83.01	82.78	0.896	1.615	2.032	4.284	1.343
1_July_22_2014_36105125	1944-2936	38293906	2451-3442	87	82.7	73.88	1.003	1.592	1.759	4.109	1.352
1_July_22_2014_36105125	1944-2936	38313734	980-1965	87	84.92	74.27	1.004	1.605	1.609	4.23	1.343
1_July_22_2014_36105125	1944-2936	38345375	816-1804	83	83.42	69.82	1.013	1.642	1.908	4.319	1.411
1_July_22_2014_36672375	854-1842	28805500	1536-2534	89	84.78	73.88	1.007	1.628	1.578	4.201	1.352
1_July_22_2014_36672375	854-1842	29346593	2397-3409	82	81.28	48.93	0.826	1.426	1.681	3.97	1.297
1_July_22_2014_36672375	854-1842	29378859	1924-2926	85	84.73	96.13	0.848	1.578	1.747	4.112	1.31
1_July_22_2014_36672375	854-1842	29728046	895-1851	90	84.86	64.21	0.863	1.547	1.724	4.128	1.337
1_July_22_2014_36672375	854-1842	29768968	894-1863	76	86.62	96.13	0.961	1.632	1.481	4.139	1.344
1_July_22_2014_36672375	854-1842	30534171	1965-2937	83	85.73	96.13	0.908	1.663	1.478	4.368	1.393
1_July_22_2014_36672375	854-1842	31846515	2504-3479	78	86.2	96.13	0.948	1.65	1.515	4.13	1.377
1_July_22_2014_36672375	854-1842	32024437	2915-3888	88	85.75	100	0.914	1.58	1.592	4.18	1.337
1_July_22_2014_36672375	854-1842	32556625	469-1435	82	84.04	89.93	0.886	1.496	1.717	3.941	1.253
1_July_22_2014_36672375	854-1842	33387781	1709-2669	87	86.81	79.1	0.858	1.523	1.949	4.176	1.258
1_July_22_2014_36672375	854-1842	33939187	1963-2916	85	85.12	70.37	0.846	1.514	1.867	4.392	1.306
1_July_22_2014_36672375	854-1842	34920078	2018-2976	89	85.56	100	0.9	1.65	1.817	4.233	1.317
1_July_22_2014_36672375	854-1842	35213406	229-1166	88	86.11	100	0.98	1.601	1.886	4.182	1.305
1_July_22_2014_36672375	854-1842	38011562	1966-2975	84	85.23	100	0.939	1.569	1.886	4.109	1.304
1_July_22_2014_36672375	854-1842	38063546	1235-2243	85	86.17	89.93	0.988	1.657	1.885	4.022	1.297
1_July_22_2014_36672375	854-1842	38191046	217-1216	82	85	100	1.02	1.579	1.841	4.271	1.333
1_July_22_2014_36672375	854-1842	38244671	739-1729	87	86.23	100	0.936	1.573	1.778	4.28	1.339
1_July_22_2014_36672375	854-1842	38293906	2451-3442	87	84.51	100	0.908	1.713	2.05	4.09	1.353
1_July_22_2014_36672375	854-1842	38313734	980-1965	87	86.65	100	0.801	1.577	1.858	4.247	1.359
1_July_22_2014_36672375	854-1842	38345375	816-1804	83	87.64	100	0.861	1.511	1.817	4.019	1.291
1_July_22_2014_38187703	1897-2872	28805500	1536-2534	87	87.45	72.83	0.868	1.605	2.03	4.14	1.268
1_July_22_2014_38187703	1897-2872	29346593	2397-3409	84	84.08	100	1.008	1.632	2.004	4.116	1.31
1_July_22_2014_38187703	1897-2872	29378859	1924-2926	87	86.87	100	1.001	1.63	2.03	4.377	1.346
1_July_22_2014_38187703	1897-2872	29728046	895-1851	80	85.53	73.21	0.994	1.616	1.871	4.288	1.288
1_July_22_2014_38187703	1897-2872	29768968	894-1863	77	85.33	65.81	0.82	1.414	1.88	4.068	1.228
1_July_22_2014_38187703	1897-2872	30534171	1965-2937	85	87.02	73.02	0.843	1.564	1.945	4.169	1.242
1_July_22_2014_38187703	1897-2872	31846515	2504-3479	89	88.65	100	0.976	1.604	1.916	4.205	1.301
1_July_22_2014_38187703	1897-2872	32024437	2915-3888	86	87.62	100	0.954	1.623	1.725	4.211	1.28
1_July_22_2014_38187703	1897-2872	32556625	469-1435	87	87.54	100	0.898	1.65	1.683	4.446	1.328
1_July_22_2014_38187703	1897-2872	33387781	1709-2669	80	87.83	100	0.925	1.596	1.94	4.305	1.272
1_July_22_2014_38187703	1897-2872	33939187	1963-2916	77	86.68	100	0.908	1.567	1.826	4.254	1.272
1_July_22_2014_38187703	1897-2872	34920078	2018-2976	91	80.11	65.44	0.94	1.469	1.655	4.29	1.273
1_July_22_2014_38187703	1897-2872	35213406	229-1166	81	85.53	100	0.885	1.507	1.855	4.311	1.289
1_July_22_2014_38187703	1897-2872	38011562	1966-2975	88	82.36	100	0.86	1.499	1.756	4.551	1.341
1_July_22_2014_38187703	1897-2872	38063546	1235-2243	82	85.71	66.02	0.911	1.633	1.73	4.38	1.352
1_July_22_2014_38187703	1897-2872	38191046	217-1216	81	85.9	100	0.977	1.587	1.776	4.306	1.338
1_July_22_2014_38187703	1897-2872	38244671	739-1729	78	85.35	69.3	1.015	1.574	1.631	4.322	1.305
1_July_22_2014_38187703	1897-2872	38293906	2451-3442	89	82.91	75.28	0.988	1.641	1.795	4.176	1.33
1_July_22_2014_38187703	1897-2872	38313734	980-1965	92	82.8	100	1.012	1.563	1.721	4.397	1.367
1_July_22_2014_38187703	1897-2872	38345375	816-1804	88	84.62	100	0.931	1.576	1.693	4.375	1.341
1_July_22_2014_39742296.wav	2221-3233	28805500	1536-2534	90	85.11	100	0.813	1.562	1.762	4.412	1.389
1_July_22_2014_39742296.wav	2221-3233	29346593	2397-3409	93	84.35	67.37	0.837	1.538	1.776	4.185	1.319
1_July_22_2014_39742296.wav	2221-3233	29378859	1924-2926	87	79.19	81.27	1.054	1.542	2.024	4.245	1.409
1_July_22_2014_39742296.wav	2221-3233	29728046	895-1851	86	83.02	100	0.905	1.583	1.899	4.477	1.315
1_July_22_2014_39742296.wav	2221-3233	29768968	894-1863	78	84.04	66.21	1.004	1.566	1.833	4.266	1.321
1_July_22_2014_39742296.wav	2221-3233	30534171	1965-2937	79	82.7	65.05	0.996	1.58	1.692	4.438	1.311
1_July_22_2014_39742296.wav	2221-3233	31846515	2504-3479	87	83.81	100	0.998	1.615	1.925	4.468	1.378
1_July_22_2014_39742296.wav	2221-3233	32024437	2915-3888	83	83.24	72	1.02	1.602	1.8	4.486	1.319
1_July_22_2014_39742296.wav	2221-3233	32556625	469-1435	87	78.2	88.61	0.781	1.404	1.994	4.312	1.25
1_July_22_2014_39742296.wav	2221-3233	33387781	1709-2669	90	85.93	65.25	0.867	1.55	1.852	4.327	1.28
1_July_22_2014_39742296.wav	2221-3233	33939187	1963-2916	82	87.28	67.56	0.977	1.586	1.828	4.345	1.331
1_July_22_2014_39742296.wav	2221-3233	34920078	2018-2976	91	83.2	100	0.868	1.6	1.716	4.573	1.341
1_July_22_2014_39742296.wav	2221-3233	35213406	229-1166	89	84.92	66.6	0.902	1.636	1.584	4.587	1.361
1_July_22_2014_39742296.wav	2221-3233	38011562	1966-2975	84	86.49	70.07	0.935	1.577	1.861	4.456	1.307
1_July_22_2014_39742296.wav	2221-3233	38063546	1235-2243	85	86.88	100	0.915	1.554	1.729	4.363	1.305
1_July_22_2014_39742296.wav	2221-3233	38191046	217-1216	85	82.65	88.66	0.818	1.578	1.764	4.149	1.22
1_July_22_2014_39742296.wav	2221-3233	38244671	739-1729	87	85.91	100	0.939	1.689	1.7	4.285	1.301
1_July_22_2014_39742296.wav	2221-3233	38293906	2451-3442	91	83.48	88.08	0.902	1.705	1.723	4.051	1.265
1_July_22_2014_39742296.wav	2221-3233	38313734	980-1965	86	83.86	100	0.902	1.739	1.723	4.193	1.334
1_July_22_2014_39742296.wav	2221-3233	38345375	816-1804	84	84.84	100	0.978	1.691	1.77	4.13	1.322
1_July_22_2014_39774218.wav	1005-1997	28805500	1536-2534	92	83.28	76.17	0.983	1.749	1.817	3.991	1.313
1_July_22_2014_39774218.wav	1005-1997	29346593	2397-3409	93	84.79	100	1.015	1.672	1.657	4.21	1.348
1_July_22_2014_39774218.wav	1005-1997	29378859	1924-2926	93	85.72	100	0.894	1.667	1.673	4.19	1.297
1_July_22_2014_39774218.wav	1005-1997	29728046	895-1851	85	83.21	100	0.91	1.804	2.018	4.044	1.366
1_July_22_2014_39774218.wav	1005-1997	29768968	894-1863	87	84.71	100	0.905	1.696	1.778	4.217	1.333
1_July_22_2014_39774218.wav	1005-1997	30534171	1965-2937	89	83.44	88.28	0.913	1.685	1.825	4.169	1.354
1_July_22_2014_39774218.wav	1005-1997	31846515	2504-3479	89	80.22	65.41	1.053	1.646	1.955	4.07	1.39
1_July_22_2014_39774218.wav	1005-1997	32024437	2915-3888	84	85.52	100	0.892	1.695	1.815	4.298	1.296
1_July_22_2014_39774218.wav	1005-1997	32556625	469-1435	92	84.93	88.08	0.871	1.704	1.927	4.093	1.284
1_July_22_2014_39774218.wav	1005-1997	33387781	1709-2669	92	83.47	100	0.994	1.684	1.694	4.271	1.292
1_July_22_2014_39774218.wav	1005-1997	33939187	1963-2916	91	81.55	100	0.933	1.664	1.905	4.39	1.336
1_July_22_2014_39774218.wav	1005-1997	34920078	2018-2976	92	81.52	88.47	0.977	1.638	2.084	4.252	1.24
1_July_22_2014_39774218.wav	1005-1997	35213406	229-1166	92	81.23	84.05	0.764	1.526	2.029	4.138	1.233
1_July_22_2014_39774218.wav	1005-1997	38011562	1966-2975	91	83.59	100	0.907	1.713	1.62	4.152	1.291
1_July_22_2014_39774218.wav	1005-1997	38063546	1235-2243	89	86.15	100	0.973	1.692	1.843	4.17	1.316
1_July_22_2014_39774218.wav	1005-1997	38191046	217-1216	92	84.52	100	0.954	1.714	1.65	4.187	1.295
1_July_22_2014_39774218.wav	1005-1997	38244671	739-1729	85	84.31	100	0.897	1.743	1.583	4.409	1.344
1_July_22_2014_39774218.wav	1005-1997	38293906	2451-3442	85	84.88	100	0.926	1.691	1.86	4.271	1.29
1_July_22_2014_39774218.wav	1005-1997	38313734	980-1965	91	85.5	100	0.907	1.661	1.733	4.18	1.287
1_July_22_2014_39774218.wav	1005-1997	38345375	816-1804	85	82.62	89.01	1.016	1.5	1.667	4.083	1.272
1_July_22_2014_41761375.wav	535-1507	28805500	1536-2534	91	83.33	67.04	0.948	1.544	1.941	4.422	1.342
1_July_22_2014_41761375.wav	535-1507	29346593	2397-3409	92	86.05	72.91	1.01	1.68	1.82	4.285	1.354
1_July_22_2014_41761375.wav	535-1507	29378859	1924-2926	91	84.39	72.91	1.091	1.627	1.926	4.232	1.341
1_July_22_2014_41761375.wav	535-1507	29728046	895-1851	91	86.46	72.72	1.045	1.599	1.884	4.152	1.341
1_July_22_2014_41761375.wav	535-1507	29768968	894-1863	84	83.81	100	0.982	1.531	1.852	4.21	1.383
1_July_22_2014_41761375.wav	535-1507	30534171	1965-2937	85	83.62	93.2	1.136	1.606	1.985	4.324	1.367
1_July_22_2014_41761375.wav	535-1507	31846515	2504-3479	92	86.32	74.43	1.029	1.612	1.884	4.246	1.344
1_July_22_2014_41761375.wav	535-1507	32024437	2915-3888	85	85.03	72.72	1.017	1.74	1.955	4.145	1.385
1_July_22_2014_41761375.wav	535-1507	32556625	469-1435	92	84.9	72.72	1.013	1.628	1.941	4.334	1.353
1_July_22_2014_41761375.wav	535-1507	33387781	1709-2669	92	85.63	82.76	1.029	1.628	2.161	4.24	1.373
1_July_22_2014_41761375.wav	535-1507	33939187	1963-2916	92	82.26	62.12	1.166	1.591	2.274	4.066	1.41
1_July_22_2014_41761375.wav	535-1507	34920078	2018-2976	92	81.67	68.18	0.991	1.629	2.207	4.413	1.313
1_July_22_2014_41761375.wav	535-1507	35213406	229-1166	92	84.3	100	0.971	1.623	2.056	4.188	1.306
1_July_22_2014_41761375.wav	535-1507	38011562	1966-2975	88	82.94	100	1.101	1.624	1.814	4.352	1.312
1_July_22_2014_41761375.wav	535-1507	38063546	1235-2243	89	82.77	100	1.029	1.604	2.188	4.48	1.356
1_July_22_2014_41761375.wav	535-1507	38191046	217-1216	87	81.48	89.01	1.065	1.558	2.104	4.244	1.259
1_July_22_2014_41761375.wav	535-1507	38244671	739-1729	89	80.35	100	0.854	1.431	1.971	4.103	1.251
1_July_22_2014_41761375.wav	535-1507	38293906	2451-3442	91	86.63	72.72	0.943	1.59	1.955	4.23	1.281
1_July_22_2014_41761375.wav	535-1507	38313734	980-1965	92	83.54	72.91	1.083	1.625	1.918	4.262	1.338
1_July_22_2014_41761375.wav	535-1507	38345375	816-1804	92	83.87	72.72	0.956	1.639	1.817	4.455	1.344
1_July_22_2014_42555671.wav	256-1240	28805500	1536-2534	92	83.11	100	1.011	1.596	1.801	4.31	1.307
1_July_22_2014_42555671.wav	256-1240	29346593	2397-3409	83	85.88	100	1.029	1.612	1.938	4.341	1.309
1_July_22_2014_42555671.wav	256-1240	29378859	1924-2926	92	80.67	61.27	0.977	1.593	1.5	3.874	1.375
1_July_22_2014_42555671.wav	256-1240	29728046	895-1851	85	80.64	35.45	0.998	1.691	1.692	4.191	1.421
1_July_22_2014_42555671.wav	256-1240	29768968	894-1863	90	79.69	88.05	0.957	1.712	1.827	3.929	1.384
1_July_22_2014_42555671.wav	256-1240	30534171	1965-2937	91	82.51	100	0.959	1.746	1.668	4.044	1.456
1_July_22_2014_42555671.wav	256-1240	31846515	2504-3479	82	82.45	65.31	1.039	1.695	1.788	3.994	1.443
1_July_22_2014_42555671.wav	256-1240	32024437	2915-3888	85	82.93	100	1.073	1.691	1.489	3.979	1.407
1_July_22_2014_42555671.wav	256-1240	32556625	469-1435	88	80.7	88.05	0.878	1.636	1.603	3.92	1.417
1_July_22_2014_42555671.wav	256-1240	33387781	1709-2669	86	78.87	100	1.078	1.675	1.883	4.075	1.469
1_July_22_2014_42555671.wav	256-1240	33939187	1963-2916	92	83.39	100	0.954	1.67	1.762	4.039	1.417
1_July_22_2014_42555671.wav	256-1240	34920078	2018-2976	93	83.18	100	0.967	1.808	1.767	3.902	1.488
1_July_22_2014_42555671.wav	256-1240	35213406	229-1166	91	81.96	100	0.963	1.703	1.808	4.081	1.454
1_July_22_2014_42555671.wav	256-1240	38011562	1966-2975	88	82.93	100	0.886	1.651	1.759	3.855	1.42
1_July_22_2014_42555671.wav	256-1240	38063546	1235-2243	81	79.25	62.42	1.114	1.652	2.169	3.853	1.51
1_July_22_2014_42555671.wav	256-1240	38191046	217-1216	87	80.51	73.21	0.947	1.704	2.118	4.168	1.414
1_July_22_2014_42555671.wav	256-1240	38244671	739-1729	88	80.51	100	0.99	1.699	1.861	3.975	1.385
1_July_22_2014_42555671.wav	256-1240	38293906	2451-3442	92	81.38	100	1.062	1.724	1.94	3.93	1.448
1_July_22_2014_42555671.wav	256-1240	38313734	980-1965	93	80.22	100	1.057	1.725	1.978	4.197	1.481
1_July_22_2014_42555671.wav	256-1240	38345375	816-1804	91	82.26	100	1.059	1.714	1.64	4.096	1.423
1_July_22_2014_39612953.wav	3102-4095	28805500	1536-2534	84	84.19	100	1.033	1.696	1.763	4.025	1.436
1_July_22_2014_39612953.wav	3102-4095	29346593	2397-3409	84	80.46	100	0.901	1.588	1.756	3.995	1.433
1_July_22_2014_39612953.wav	3102-4095	29378859	1924-2926	85	82.87	100	0.957	1.748	1.539	4.266	1.465
1_July_22_2014_39612953.wav	3102-4095	29728046	895-1851	81	83.44	100	0.982	1.69	1.78	4.11	1.41
1_July_22_2014_39612953.wav	3102-4095	29768968	894-1863	91	82.43	63.39	0.966	1.665	1.646	4.064	1.408
1_July_22_2014_39612953.wav	3102-4095	30534171	1965-2937	90	82	100	0.9	1.709	1.827	3.915	1.327
1_July_22_2014_39612953.wav	3102-4095	31846515	2504-3479	93	81.67	87.62	0.954	1.594	1.463	3.831	1.298
1_July_22_2014_39612953.wav	3102-4095	32024437	2915-3888	86	83.49	100	0.968	1.691	1.605	4.157	1.345
1_July_22_2014_39612953.wav	3102-4095	32556625	469-1435	92	82.77	100	0.878	1.611	1.7	4.159	1.367
1_July_22_2014_39612953.wav	3102-4095	33387781	1709-2669	79	83.35	64.02	0.933	1.744	1.6	4.014	1.379
1_July_22_2014_39612953.wav	3102-4095	33939187	1963-2916	86	83.15	100	1.006	1.696	1.696	3.959	1.366
1_July_22_2014_39612953.wav	3102-4095	34920078	2018-2976	87	80.73	100	0.966	1.666	1.67	3.882	1.364
1_July_22_2014_39612953.wav	3102-4095	35213406	229-1166	92	80.8	74.85	1.013	1.758	1.631	3.788	1.358
1_July_22_2014_39612953.wav	3102-4095	38011562	1966-2975	90	80.83	100	1.041	1.679	1.726	4.049	1.392
1_July_22_2014_39612953.wav	3102-4095	38063546	1235-2243	93	83.56	100	0.924	1.67	1.648	4.005	1.341
1_July_22_2014_39612953.wav	3102-4095	38191046	217-1216	93	82.99	64.02	0.937	1.807	1.758	3.867	1.41
1_July_22_2014_39612953.wav	3102-4095	38244671	739-1729	93	83.47	100	0.932	1.704	1.711	4.048	1.377
1_July_22_2014_39612953.wav	3102-4095	38293906	2451-3442	93	82.83	100	0.857	1.652	1.669	3.812	1.344
1_July_22_2014_39612953.wav	3102-4095	38313734	980-1965	93	81.23	75.24	1.079	1.653	2.025	3.804	1.437
1_July_22_2014_39612953.wav	3102-4095	38345375	816-1804	93	77.96	54.46	0.92	1.705	1.935	4.132	1.336
1_July_22_2014_40267031.wav	2702-3696	28805500	1536-2534	86	78.76	100	0.958	1.671	1.929	4.211	1.376
1_July_22_2014_40267031.wav	2702-3696	29346593	2397-3409	90	78.82	87.62	1.007	1.642	1.89	3.989	1.285
1_July_22_2014_40267031.wav	2702-3696	29378859	1924-2926	82	76.46	22.82	0.853	1.515	1.663	3.821	1.29
1_July_22_2014_40267031.wav	2702-3696	29728046	895-1851	88	82.14	100	0.935	1.719	1.514	4.015	1.331
1_July_22_2014_40267031.wav	2702-3696	29768968	894-1863	87	84.91	100	1.002	1.7	1.689	3.986	1.358
1_July_22_2014_40267031.wav	2702-3696	30534171	1965-2937	86	83.5	66.15	0.984	1.72	1.482	3.989	1.339
1_July_22_2014_40267031.wav	2702-3696	31846515	2504-3479	82	82.22	100	0.926	1.749	1.466	4.228	1.388
1_July_22_2014_40267031.wav	2702-3696	32024437	2915-3888	83	84.1	100	0.953	1.696	1.712	4.07	1.331
1_July_22_2014_40267031.wav	2702-3696	32556625	469-1435	82	83.57	100	0.936	1.667	1.587	4.029	1.332
1_July_22_2014_40267031.wav	2702-3696	33387781	1709-2669	81	84.05	100	0.97	1.63	1.751	4.344	1.393
1_July_22_2014_40267031.wav	2702-3696	33939187	1963-2916	86	82.7	88.07	0.948	1.523	1.474	4.044	1.332
1_July_22_2014_40267031.wav	2702-3696	34920078	2018-2976	88	83.46	72.3	0.931	1.549	1.814	4.254	1.331
1_July_22_2014_40267031.wav	2702-3696	35213406	229-1166	80	82.61	100	0.963	1.64	1.745	4.183	1.324
1_July_22_2014_40267031.wav	2702-3696	38011562	1966-2975	91	83.41	100	0.962	1.675	1.625	4.31	1.395
1_July_22_2014_40267031.wav	2702-3696	38063546	1235-2243	83	83.41	100	1.04	1.626	1.724	4.25	1.382
1_July_22_2014_40267031.wav	2702-3696	38191046	217-1216	84	84.57	100	1.004	1.593	1.696	4.191	1.382
1_July_22_2014_40267031.wav	2702-3696	38244671	739-1729	79	83.17	100	1.052	1.684	1.661	4.106	1.374
1_July_22_2014_40267031.wav	2702-3696	38293906	2451-3442	82	83.7	100	1.083	1.604	1.781	4.347	1.41
1_July_22_2014_40267031.wav	2702-3696	38313734	980-1965	83	82.31	100	0.99	1.62	1.685	4.302	1.385
1_July_22_2014_40267031.wav	2702-3696	38345375	816-1804	89	83.49	100	0.975	1.738	1.779	4.171	1.428
				86.645

## Sheet: grey 146 vs black 33
tutor-black 33	duration	grey 146	duration-grey 146	% similarity	accuarcy	% sequential	Pitch diff	FM diff	Entropy diff	Goodness diff	AM diff
1_January_24_2015_28862750.wav	3209-4039	2_December_28_2013_28796500	817-1742	54	77.45	56.54	1.426	1.559	1.322	4.954	1.948
1_January_24_2015_28862750.wav	3209-4039	2_December_28_2013_29204437	1153-2097	55	72.13	52.43	1.508	1.589	1.294	4.704	1.924
1_January_24_2015_28862750.wav	3209-4039	2_December_28_2013_29303546	2382-3328	54	71.35	60.64	1.475	1.479	1.476	5.013	1.804
1_January_24_2015_28862750.wav	3209-4039	2_December_28_2013_29366500	2196-3154	47	77.81	38.37	1.45	1.431	1.269	4.706	1.918
1_January_24_2015_28862750.wav	3209-4039	2_December_28_2013_29430578	2678-3713	61	75.4	68.86	1.646	1.526	1.34	4.905	2.028
1_January_24_2015_28862750.wav	3209-4039	2_December_28_2013_29605781	555-1497	51	76.67	68.21	1.452	1.589	1.295	5.08	1.958
1_January_24_2015_28862750.wav	3209-4039	2_December_28_2013_29733765	292-1243	43	70.47	38.81	1.413	1.593	1.294	4.911	1.997
1_January_24_2015_28862750.wav	3209-4039	2_December_28_2013_29840421	3489-4423	48	72.9	58.48	1.45	1.556	1.267	4.891	1.903
1_January_24_2015_28862750.wav	3209-4039	2_December_28_2013_29906000	321-1273	48	74.82	56.08	1.488	1.8	1.396	5.158	1.958
1_January_24_2015_28862750.wav	3209-4039	2_December_28_2013_30255000	526-1421	52	72.92	50.7	1.742	1.573	1.443	5.065	2.083
1_January_24_2015_28862750.wav	3209-4039	2_December_28_2013_30355875	1822-2782	48	74.75	68.43	1.402	1.819	1.142	5.338	1.858
1_January_24_2015_28862750.wav	3209-4039	2_December_28_2013_30590203	949-1896	51	74.79	44.43	1.442	1.599	1.337	5.051	1.931
1_January_24_2015_28862750.wav	3209-4039	2_December_28_2013_30727765	2113-3061	37	67.21	37.29	1.564	1.6	1.261	5.207	2.038
1_January_24_2015_28862750.wav	3209-4039	2_December_28_2013_30660343	1622-2548	53	74.65	52.63	1.438	1.631	1.247	5.334	1.938
1_January_24_2015_28862750.wav	3209-4039	2_December_28_2013_31019921	2225-3162	44	72.93	24.1	1.518	1.557	1.285	5.036	1.997
1_January_24_2015_28862750.wav	3209-4039	2_December_28_2013_34969343	1502-2433	53	74.71	48.75	1.481	1.685	1.243	5.295	1.938
1_January_24_2015_28862750.wav	3209-4039	2_December_28_2013_29440765	1621-2578	57	71.94	63.89	1.597	1.571	1.333	4.947	1.947
1_January_24_2015_28862750.wav	3209-4039	2_December_28_2013_29632109	949-1882	49	74.39	64.48	1.557	1.487	1.295	4.615	1.981
1_January_24_2015_28862750.wav	3209-4039	2_December_28_2013_30167406	610-1553	46	76.13	36.32	1.464	1.725	1.339	5.349	1.917
1_January_24_2015_28862750.wav	3209-4039	2_December_28_2013_33339187	993-1937	51	72.46	31.47	1.45	1.501	1.259	4.9	1.818
1_January_24_2015_29393296.wav	2340-3130	2_December_28_2013_28796500	817-1742	49	72.69	55.67	1.427	1.547	1.414	5.078	1.869
1_January_24_2015_29393296.wav	2340-3130	2_December_28_2013_29204437	1153-2097	59	74.51	51.62	1.48	1.695	1.178	5.396	1.913
1_January_24_2015_29393296.wav	2340-3130	2_December_28_2013_29303546	2382-3328	64	72.79	63.67	1.574	1.622	1.324	5.014	2.147
1_January_24_2015_29393296.wav	2340-3130	2_December_28_2013_29366500	2196-3154	54	72.34	62.37	1.515	1.586	1.245	4.966	1.827
1_January_24_2015_29393296.wav	2340-3130	2_December_28_2013_29430578	2678-3713	56	75.37	50.99	1.254	1.509	1.404	4.958	2.044
1_January_24_2015_29393296.wav	2340-3130	2_December_28_2013_29605781	555-1497	40	72.41	44.74	1.348	1.539	1.36	4.708	2.02
1_January_24_2015_29393296.wav	2340-3130	2_December_28_2013_29733765	292-1243	54	70.2	64.07	1.308	1.426	1.57	5.025	1.904
1_January_24_2015_29393296.wav	2340-3130	2_December_28_2013_29840421	3489-4423	43	72.58	46.63	1.296	1.389	1.351	4.703	2.019
1_January_24_2015_29393296.wav	2340-3130	2_December_28_2013_29906000	321-1273	46	72.87	57.98	1.503	1.493	1.43	4.897	2.127
1_January_24_2015_29393296.wav	2340-3130	2_December_28_2013_30255000	526-1421	47	75.46	46.84	1.279	1.536	1.342	5.087	2.054
1_January_24_2015_29393296.wav	2340-3130	2_December_28_2013_30355875	1822-2782	53	72.47	44.74	1.249	1.548	1.354	4.913	2.095
1_January_24_2015_29393296.wav	2340-3130	2_December_28_2013_30590203	949-1896	50	67.61	52.52	1.28	1.506	1.329	4.882	2.004
1_January_24_2015_29393296.wav	2340-3130	2_December_28_2013_30727765	2113-3061	40	75.66	86.76	1.328	1.748	1.43	5.153	2.056
1_January_24_2015_29393296.wav	2340-3130	2_December_28_2013_30660343	1622-2548	58	70.93	54.83	1.601	1.54	1.528	5.053	2.181
1_January_24_2015_29393296.wav	2340-3130	2_December_28_2013_31019921	2225-3162	53	72.16	73.1	1.221	1.752	1.175	5.326	1.955
1_January_24_2015_29393296.wav	2340-3130	2_December_28_2013_34969343	1502-2433	56	71.57	43.48	1.282	1.556	1.414	5.054	2.027
1_January_24_2015_29393296.wav	2340-3130	2_December_28_2013_29440765	1621-2578	50	72.47	54.62	1.409	1.551	1.331	5.204	2.135
1_January_24_2015_29393296.wav	2340-3130	2_December_28_2013_29632109	949-1882	42	73.37	55.46	1.255	1.582	1.302	5.323	2.037
1_January_24_2015_29393296.wav	2340-3130	2_December_28_2013_30167406	610-1553	46	72	35.08	1.358	1.512	1.346	5.037	2.095
1_January_24_2015_29393296.wav	2340-3130	2_December_28_2013_33339187	993-1937	57	73.11	42.01	1.312	1.627	1.299	5.276	2.04
1_January_24_2015_29687031.wav	420-1221	2_December_28_2013_28796500	817-1742	57	71.2	34.66	1.287	1.67	1.382	5.332	2.014
1_January_24_2015_29687031.wav	420-1221	2_December_28_2013_29204437	1153-2097	55	71.12	71.21	1.282	1.451	1.33	4.913	1.916
1_January_24_2015_29687031.wav	420-1221	2_December_28_2013_29303546	2382-3328	55	70.07	48.73	1.351	1.537	1.313	4.969	1.928
1_January_24_2015_29687031.wav	420-1221	2_December_28_2013_29366500	2196-3154	47	71.97	53.57	1.338	1.503	1.403	5.165	1.982
1_January_24_2015_29687031.wav	420-1221	2_December_28_2013_29430578	2678-3713	47	72.51	53.99	1.252	1.491	1.489	5.098	1.965
1_January_24_2015_29687031.wav	420-1221	2_December_28_2013_29605781	555-1497	54	71.36	42.85	1.307	1.638	1.214	5.382	2.011
1_January_24_2015_29687031.wav	420-1221	2_December_28_2013_29733765	292-1243	48	68.66	73.04	1.411	1.588	1.398	5.005	2.245
1_January_24_2015_29687031.wav	420-1221	2_December_28_2013_29840421	3489-4423	38	72.14	36.76	1.444	1.531	1.406	4.946	2.045
1_January_24_2015_29687031.wav	420-1221	2_December_28_2013_29906000	321-1273	43	71.19	51.33	1.281	1.554	1.462	4.692	1.927
1_January_24_2015_29687031.wav	420-1221	2_December_28_2013_30255000	526-1421	38	66.9	45.57	1.371	1.584	1.414	4.446	1.902
1_January_24_2015_29687031.wav	420-1221	2_December_28_2013_30355875	1822-2782	46	66.58	63.92	1.332	1.477	1.633	4.714	1.785
1_January_24_2015_29687031.wav	420-1221	2_December_28_2013_30590203	949-1896	51	70.17	46.42	1.315	1.429	1.405	4.431	1.896
1_January_24_2015_29687031.wav	420-1221	2_December_28_2013_30727765	2113-3061	36	68.59	47.91	1.523	1.528	1.49	4.663	2.008
1_January_24_2015_29687031.wav	420-1221	2_December_28_2013_30660343	1622-2548	51	72.11	43.11	1.306	1.589	1.39	4.821	1.935
1_January_24_2015_29687031.wav	420-1221	2_December_28_2013_31019921	2225-3162	35	67.45	29.98	1.272	1.589	1.407	4.635	1.975
1_January_24_2015_29687031.wav	420-1221	2_December_28_2013_34969343	1502-2433	44	69.44	42.36	1.307	1.55	1.378	4.61	1.883
1_January_24_2015_29687031.wav	420-1221	2_December_28_2013_29440765	1621-2578	51	72.55	62.55	1.35	1.794	1.475	4.943	1.937
1_January_24_2015_29687031.wav	420-1221	2_December_28_2013_29632109	949-1882	41	70.08	60.29	1.622	1.576	1.586	4.845	2.064
1_January_24_2015_29687031.wav	420-1221	2_December_28_2013_30167406	610-1553	38	73.09	69.9	1.248	1.811	1.217	5.122	1.839
1_January_24_2015_29687031.wav	420-1221	2_December_28_2013_33339187	993-1937	51	71.81	54.96	1.305	1.596	1.47	4.778	1.909
1_January_24_2015_30345906.wav	1465-2259	2_December_28_2013_28796500	817-1742	53	73.39	53.42	1.383	1.557	1.398	4.783	1.979
1_January_24_2015_30345906.wav	1465-2259	2_December_28_2013_29204437	1153-2097	46	70.63	52.88	1.338	1.679	1.35	5.053	1.919
1_January_24_2015_30345906.wav	1465-2259	2_December_28_2013_29303546	2382-3328	54	67.13	38.31	1.467	1.571	1.462	4.699	1.928
1_January_24_2015_30345906.wav	1465-2259	2_December_28_2013_29366500	2196-3154	54	67.36	55.38	1.419	1.484	1.354	4.308	1.953
1_January_24_2015_30345906.wav	1465-2259	2_December_28_2013_29430578	2678-3713	55	75.75	53.45	1.314	1.72	1.427	5.127	1.898
1_January_24_2015_30345906.wav	1465-2259	2_December_28_2013_29605781	555-1497	49	69.16	47.7	1.306	1.499	1.386	4.6	1.798
1_January_24_2015_30345906.wav	1465-2259	2_December_28_2013_29733765	292-1243	53	68.19	66.48	1.375	1.581	1.364	4.679	1.81
1_January_24_2015_30345906.wav	1465-2259	2_December_28_2013_29840421	3489-4423	46	66.62	51.52	1.363	1.546	1.459	4.903	1.864
1_January_24_2015_30345906.wav	1465-2259	2_December_28_2013_29906000	321-1273	46	69.52	35.96	1.28	1.542	1.546	4.786	1.849
1_January_24_2015_30345906.wav	1465-2259	2_December_28_2013_30255000	526-1421	44	72.08	41.69	1.333	1.688	1.257	5.178	1.894
1_January_24_2015_30345906.wav	1465-2259	2_December_28_2013_30355875	1822-2782	40	72.11	68.83	1.436	1.622	1.455	4.793	2.127
1_January_24_2015_30345906.wav	1465-2259	2_December_28_2013_30590203	949-1896	44	72.89	49.41	1.281	1.627	1.356	5.076	1.915
1_January_24_2015_30345906.wav	1465-2259	2_December_28_2013_30727765	2113-3061	39	73.04	53.27	1.097	1.483	1.77	5.043	1.856
1_January_24_2015_30345906.wav	1465-2259	2_December_28_2013_30660343	1622-2548	43	70.44	49.53	1.203	1.514	1.673	4.801	1.833
1_January_24_2015_30345906.wav	1465-2259	2_December_28_2013_31019921	2225-3162	54	68.78	58.67	1.151	1.394	1.983	5.069	1.717
1_January_24_2015_30345906.wav	1465-2259	2_December_28_2013_34969343	1502-2433	47	74.57	54.93	1.136	1.366	1.694	4.789	1.828
1_January_24_2015_30345906.wav	1465-2259	2_December_28_2013_29440765	1621-2578	50	70.91	54.72	1.376	1.473	1.827	5.013	1.939
1_January_24_2015_30345906.wav	1465-2259	2_December_28_2013_29632109	949-1882	46	75.35	36.24	1.12	1.507	1.599	5.161	1.867
1_January_24_2015_30345906.wav	1465-2259	2_December_28_2013_30167406	610-1553	41	68.56	39.14	1.097	1.521	1.649	4.99	1.906
1_January_24_2015_30345906.wav	1465-2259	2_December_28_2013_33339187	993-1937	41	71.72	58.04	1.124	1.491	1.626	4.969	1.81
1_January_24_2015_30361203.wav	830-1623	2_December_28_2013_28796500	817-1742	41	70.53	61.78	1.175	1.355	1.804	4.657	1.79
1_January_24_2015_30361203.wav	830-1623	2_December_28_2013_29204437	1153-2097	47	70.91	64.48	1.136	1.534	1.761	5.135	1.839
1_January_24_2015_30361203.wav	830-1623	2_December_28_2013_29303546	2382-3328	53	67.51	73	1.268	1.526	1.655	5.296	1.947
1_January_24_2015_30361203.wav	830-1623	2_December_28_2013_29366500	2196-3154	47	71.28	61.78	1.083	1.558	1.582	5.44	1.844
1_January_24_2015_30361203.wav	830-1623	2_December_28_2013_29430578	2678-3713	43	71.11	39.77	1.211	1.488	1.645	5.138	1.906
1_January_24_2015_30361203.wav	830-1623	2_December_28_2013_29605781	555-1497	41	68.42	49.32	1.154	1.592	1.578	5.404	1.845
1_January_24_2015_30361203.wav	830-1623	2_December_28_2013_29733765	292-1243	38	73.09	58.25	1.305	1.507	1.751	5.045	1.854
1_January_24_2015_30361203.wav	830-1623	2_December_28_2013_29840421	3489-4423	32	66.53	66.14	1.25	1.416	1.481	4.661	1.886
1_January_24_2015_30361203.wav	830-1623	2_December_28_2013_29906000	321-1273	41	70.46	50.77	1.125	1.645	1.623	5.48	1.827
1_January_24_2015_30361203.wav	830-1623	2_December_28_2013_30255000	526-1421	44	71.69	50.36	1.127	1.426	1.667	4.954	1.728
1_January_24_2015_30361203.wav	830-1623	2_December_28_2013_30355875	1822-2782	47	71.42	57.42	1.198	1.511	1.627	5.034	1.735
1_January_24_2015_30361203.wav	830-1623	2_December_28_2013_30590203	949-1896	48	72.65	59.29	1.184	1.476	1.743	5.256	1.794
1_January_24_2015_30361203.wav	830-1623	2_December_28_2013_30727765	2113-3061	46	72.36	63.03	1.091	1.465	1.843	5.141	1.779
1_January_24_2015_30361203.wav	830-1623	2_December_28_2013_30660343	1622-2548	50	68.83	43.13	1.149	1.61	1.431	5.529	1.823
1_January_24_2015_30361203.wav	830-1623	2_December_28_2013_31019921	2225-3162	48	69.89	65.93	1.169	1.515	1.729	5.094	1.811
1_January_24_2015_30361203.wav	830-1623	2_December_28_2013_34969343	1502-2433	44	68.82	66.38	1.182	1.724	1.648	5.298	1.87
1_January_24_2015_30361203.wav	830-1623	2_December_28_2013_29440765	1621-2578	48	77.06	48.34	1.482	1.526	1.404	4.996	1.978
1_January_24_2015_30361203.wav	830-1623	2_December_28_2013_29632109	949-1882	43	72	50.61	1.561	1.558	1.362	4.748	1.953
1_January_24_2015_30361203.wav	830-1623	2_December_28_2013_30167406	610-1553	44	70.68	72.72	1.536	1.466	1.57	5.02	1.841
1_January_24_2015_30361203.wav	830-1623	2_December_28_2013_33339187	993-1937	43	69.9	45.24	1.514	1.39	1.353	4.73	1.955
1_January_24_2015_30481859.wav	282-1065	2_December_28_2013_28796500	817-1742	57	71.46	49.58	1.468	1.558	1.357	4.938	2.027
1_January_24_2015_30481859.wav	282-1065	2_December_28_2013_29204437	1153-2097	55	72.43	55.16	1.507	1.532	1.33	4.914	1.928
1_January_24_2015_30481859.wav	282-1065	2_December_28_2013_29303546	2382-3328	50	68.55	74.49	1.544	1.776	1.435	5.242	1.993
1_January_24_2015_30481859.wav	282-1065	2_December_28_2013_29366500	2196-3154	57	72.13	50.2	1.792	1.514	1.525	5.143	2.116
1_January_24_2015_30481859.wav	282-1065	2_December_28_2013_29430578	2678-3713	57	75.71	67.97	1.565	1.384	1.452	4.608	1.909
1_January_24_2015_30481859.wav	282-1065	2_December_28_2013_29605781	555-1497	48	72.5	47.93	1.496	1.557	1.414	5.081	1.961
1_January_24_2015_30481859.wav	282-1065	2_December_28_2013_29733765	292-1243	64	69.4	62.19	1.617	1.568	1.331	5.244	2.069
1_January_24_2015_30481859.wav	282-1065	2_December_28_2013_29840421	3489-4423	43	72.5	60.12	1.495	1.599	1.316	5.381	1.961
1_January_24_2015_30481859.wav	282-1065	2_December_28_2013_29906000	321-1273	47	73.58	30.99	1.573	1.524	1.347	5.086	2.027
1_January_24_2015_30481859.wav	282-1065	2_December_28_2013_30255000	526-1421	49	70.09	56.19	1.534	1.682	1.301	5.343	1.965
1_January_24_2015_30481859.wav	282-1065	2_December_28_2013_30355875	1822-2782	53	72.79	51.85	1.649	1.527	1.406	5	1.978
1_January_24_2015_30481859.wav	282-1065	2_December_28_2013_30590203	949-1896	43	71.08	64.37	1.611	1.448	1.321	4.611	2.013
1_January_24_2015_30481859.wav	282-1065	2_December_28_2013_30727765	2113-3061	52	77.94	61.36	1.522	1.702	1.384	5.427	1.949
1_January_24_2015_30481859.wav	282-1065	2_December_28_2013_30660343	1622-2548	55	74.65	46.69	1.507	1.474	1.33	4.911	1.85
1_January_24_2015_30481859.wav	282-1065	2_December_28_2013_31019921	2225-3162	58	70.16	55.99	1.57	1.551	1.311	4.983	1.861
1_January_24_2015_30481859.wav	282-1065	2_December_28_2013_34969343	1502-2433	47	67.89	45.24	1.56	1.52	1.405	5.202	1.914
1_January_24_2015_30481859.wav	282-1065	2_December_28_2013_29440765	1621-2578	58	75.8	61.77	1.484	1.529	1.489	5.086	1.899
1_January_24_2015_30481859.wav	282-1065	2_December_28_2013_29632109	949-1882	55	73.4	39.66	1.536	1.673	1.218	5.478	1.943
1_January_24_2015_30481859.wav	282-1065	2_December_28_2013_30167406	610-1553	49	72.33	62.39	1.533	1.541	1.382	5.047	1.933
1_January_24_2015_30481859.wav	282-1065	2_December_28_2013_33339187	993-1937	49	74.44	55.37	1.697	1.469	1.427	4.964	2.061
1_January_24_2015_30628093.wav	684-1481	2_December_28_2013_28796500	817-1742	43	68.57	64.54	1.513	1.563	1.817	5.083	1.91
1_January_24_2015_30628093.wav	684-1481	2_December_28_2013_29204437	1153-2097	50	70.89	69.96	1.484	1.504	1.575	4.779	2.021
1_January_24_2015_30628093.wav	684-1481	2_December_28_2013_29303546	2382-3328	58	72.44	59.12	1.681	1.59	1.673	4.978	2.129
1_January_24_2015_30628093.wav	684-1481	2_December_28_2013_29366500	2196-3154	54	72.31	42.02	1.486	1.67	1.555	5.155	2.058
1_January_24_2015_30628093.wav	684-1481	2_December_28_2013_29430578	2678-3713	51	70.74	45.77	1.447	1.666	1.577	4.98	2.096
1_January_24_2015_30628093.wav	684-1481	2_December_28_2013_29605781	555-1497	39	68.66	62.46	1.486	1.633	1.549	4.963	2.005
1_January_24_2015_30628093.wav	684-1481	2_December_28_2013_29733765	292-1243	51	73.29	75.8	1.52	1.876	1.638	5.239	2.055
1_January_24_2015_30628093.wav	684-1481	2_December_28_2013_29840421	3489-4423	47	73.87	50.15	1.776	1.635	1.767	5.139	2.185
1_January_24_2015_30628093.wav	684-1481	2_December_28_2013_29906000	321-1273	58	70.87	66.84	1.544	1.497	1.686	4.673	1.983
1_January_24_2015_30628093.wav	684-1481	2_December_28_2013_30255000	526-1421	43	69.6	55.57	1.477	1.67	1.646	5.124	2.031
1_January_24_2015_30628093.wav	684-1481	2_December_28_2013_30355875	1822-2782	52	69.12	46.19	1.599	1.675	1.559	5.277	2.139
1_January_24_2015_30628093.wav	684-1481	2_December_28_2013_30590203	949-1896	40	69.42	57.66	1.473	1.71	1.524	5.415	2.036
1_January_24_2015_30628093.wav	684-1481	2_December_28_2013_30727765	2113-3061	47	72.06	45.6	1.554	1.63	1.568	5.107	2.1
1_January_24_2015_30628093.wav	684-1481	2_December_28_2013_30660343	1622-2548	45	71.27	57.24	1.517	1.778	1.517	5.36	2.044
1_January_24_2015_30628093.wav	684-1481	2_December_28_2013_31019921	2225-3162	49	66.37	47.65	1.632	1.642	1.638	5.022	2.048
1_January_24_2015_30628093.wav	684-1481	2_December_28_2013_34969343	1502-2433	51	64.8	70.99	1.588	1.555	1.508	4.69	2.075
1_January_24_2015_30628093.wav	684-1481	2_December_28_2013_29440765	1621-2578	57	76.89	48.07	1.498	1.804	1.594	5.422	2.016
1_January_24_2015_30628093.wav	684-1481	2_December_28_2013_29632109	949-1882	33	71.17	63.5	1.484	1.58	1.561	4.972	1.919
1_January_24_2015_30628093.wav	684-1481	2_December_28_2013_30167406	610-1553	46	68.64	43.27	1.547	1.657	1.536	5.036	1.923
1_January_24_2015_30628093.wav	684-1481	2_December_28_2013_33339187	993-1937	46	70.26	61.41	1.54	1.628	1.635	5.236	1.985
1_January_24_2015_31125343.wav	2040-2830	2_December_28_2013_28796500	817-1742	63	67.73	61.62	1.513	1.651	1.616	5.079	1.998
1_January_24_2015_31125343.wav	2040-2830	2_December_28_2013_29204437	1153-2097	54	70.8	62.35	1.462	1.631	1.724	5.158	1.97
1_January_24_2015_31125343.wav	2040-2830	2_December_28_2013_29303546	2382-3328	51	72.05	60.53	1.144	1.684	2.088	4.915	1.878
1_January_24_2015_31125343.wav	2040-2830	2_December_28_2013_29366500	2196-3154	60	73.06	57.42	1.249	1.713	1.981	4.669	1.853
1_January_24_2015_31125343.wav	2040-2830	2_December_28_2013_29430578	2678-3713	61	72.04	71.54	1.197	1.592	2.314	4.92	1.736
1_January_24_2015_31125343.wav	2040-2830	2_December_28_2013_29605781	555-1497	54	71.13	51.28	1.183	1.57	2.007	4.654	1.851
1_January_24_2015_31125343.wav	2040-2830	2_December_28_2013_29733765	292-1243	56	73.91	64.27	1.42	1.683	2.154	4.891	1.961
1_January_24_2015_31125343.wav	2040-2830	2_December_28_2013_29840421	3489-4423	50	73.94	41.21	1.167	1.709	1.891	5.038	1.886
1_January_24_2015_31125343.wav	2040-2830	2_December_28_2013_29906000	321-1273	39	72.91	50.36	1.144	1.723	1.947	4.854	1.929
1_January_24_2015_31125343.wav	2040-2830	2_December_28_2013_30255000	526-1421	48	69.88	82.04	1.168	1.692	1.928	4.832	1.833
1_January_24_2015_31125343.wav	2040-2830	2_December_28_2013_30355875	1822-2782	48	76.61	64.07	1.229	1.924	1.929	5.18	1.892
1_January_24_2015_31125343.wav	2040-2830	2_December_28_2013_30590203	949-1896	49	71.47	58.87	1.524	1.733	2.227	5.08	2.016
1_January_24_2015_31125343.wav	2040-2830	2_December_28_2013_30727765	2113-3061	47	73.79	71.75	1.221	1.556	2.12	4.504	1.809
1_January_24_2015_31125343.wav	2040-2830	2_December_28_2013_30660343	1622-2548	48	75.02	60.12	1.182	1.737	2.075	4.995	1.863
1_January_24_2015_31125343.wav	2040-2830	2_December_28_2013_31019921	2225-3162	52	72.29	66.97	1.313	1.726	1.965	5.162	1.968
1_January_24_2015_31125343.wav	2040-2830	2_December_28_2013_34969343	1502-2433	49	73.34	56.17	1.128	1.753	1.898	5.299	1.857
1_January_24_2015_31125343.wav	2040-2830	2_December_28_2013_29440765	1621-2578	53	71.14	42.88	1.257	1.688	1.944	5.002	1.93
1_January_24_2015_31125343.wav	2040-2830	2_December_28_2013_29632109	949-1882	50	69.62	60.95	1.2	1.784	1.875	5.283	1.867
1_January_24_2015_31125343.wav	2040-2830	2_December_28_2013_30167406	610-1553	51	73.63	54.93	1.352	1.714	2.061	4.926	1.88
1_January_24_2015_31125343.wav	2040-2830	2_December_28_2013_33339187	993-1937	54	69.75	69.67	1.299	1.622	1.748	4.504	1.912
1_January_24_2015_31228906.wav	79-869	2_December_28_2013_28796500	817-1742	52	73.45	61.78	1.246	1.712	1.935	4.891	1.758
1_January_24_2015_31228906.wav	79-869	2_December_28_2013_29204437	1153-2097	49	70.86	56.17	1.23	1.676	2.055	5.124	1.815
1_January_24_2015_31228906.wav	79-869	2_December_28_2013_29303546	2382-3328	52	75.68	66.77	1.138	1.659	2.159	4.991	1.8
1_January_24_2015_31228906.wav	79-869	2_December_28_2013_29366500	2196-3154	48	71.14	45.37	1.196	1.806	1.711	5.422	1.846
1_January_24_2015_31228906.wav	79-869	2_December_28_2013_29430578	2678-3713	49	67.01	58.87	1.215	1.716	2.045	4.963	1.829
1_January_24_2015_31228906.wav	79-869	2_December_28_2013_29605781	555-1497	43	75.55	45.12	1.172	1.841	1.912	5.37	1.848
1_January_24_2015_31228906.wav	79-869	2_December_28_2013_29733765	292-1243	50	71.84	57.45	1.101	1.59	2.186	5.083	1.858
1_January_24_2015_31228906.wav	79-869	2_December_28_2013_29840421	3489-4423	48	70.29	57.65	1.208	1.621	2.076	4.837	1.834
1_January_24_2015_31228906.wav	79-869	2_December_28_2013_29906000	321-1273	45	67.2	68.34	1.153	1.512	2.415	5.113	1.716
1_January_24_2015_31228906.wav	79-869	2_December_28_2013_30255000	526-1421	50	73.54	70.4	1.14	1.467	2.108	4.829	1.83
1_January_24_2015_31228906.wav	79-869	2_December_28_2013_30355875	1822-2782	48	70.83	63.2	1.381	1.566	2.254	5.049	1.939
1_January_24_2015_31228906.wav	79-869	2_December_28_2013_30590203	949-1896	47	71.04	53.95	1.123	1.623	1.988	5.215	1.863
1_January_24_2015_31228906.wav	79-869	2_December_28_2013_30727765	2113-3061	45	71.01	52.31	1.1	1.625	2.045	5.03	1.907
1_January_24_2015_31228906.wav	79-869	2_December_28_2013_30660343	1622-2548	55	71.37	65.57	1.127	1.592	2.023	5.011	1.813
1_January_24_2015_31228906.wav	79-869	2_December_28_2013_31019921	2225-3162	51	71.84	65.87	1.188	1.835	2.021	5.33	1.874
1_January_24_2015_31228906.wav	79-869	2_December_28_2013_34969343	1502-2433	55	69.79	62.38	1.483	1.613	2.329	5.226	1.993
1_January_24_2015_31228906.wav	79-869	2_December_28_2013_29440765	1621-2578	54	72.53	74.1	1.176	1.456	2.221	4.705	1.787
1_January_24_2015_31228906.wav	79-869	2_December_28_2013_29632109	949-1882	48	71.67	76.15	1.14	1.633	2.176	5.171	1.841
1_January_24_2015_31228906.wav	79-869	2_December_28_2013_30167406	610-1553	48	71.25	58.21	1.272	1.631	2.063	5.332	1.946
1_January_24_2015_31228906.wav	79-869	2_December_28_2013_33339187	993-1937	49	70.01	50.11	1.081	1.659	1.992	5.468	1.838
1_January_24_2015_31819593.wav	3303-4088	2_December_28_2013_28796500	817-1742	64	73.64	72.66	1.311	1.608	2.16	5.088	1.858
1_January_24_2015_31819593.wav	3303-4088	2_December_28_2013_29204437	1153-2097	60	69.42	68.75	1.258	1.521	1.844	4.692	1.894
1_January_24_2015_31819593.wav	3303-4088	2_December_28_2013_29303546	2382-3328	56	71.7	53.28	1.127	1.754	2.006	5.509	1.828
1_January_24_2015_31819593.wav	3303-4088	2_December_28_2013_29366500	2196-3154	53	73.81	66.28	1.132	1.534	2.076	5	1.729
1_January_24_2015_31819593.wav	3303-4088	2_December_28_2013_29430578	2678-3713	60	70.85	63.61	1.203	1.619	2.033	5.076	1.738
1_January_24_2015_31819593.wav	3303-4088	2_December_28_2013_29605781	555-1497	50	67.68	63.2	1.185	1.582	2.156	5.291	1.793
1_January_24_2015_31819593.wav	3303-4088	2_December_28_2013_29733765	292-1243	61	68.8	64.43	1.094	1.575	2.258	5.184	1.781
1_January_24_2015_31819593.wav	3303-4088	2_December_28_2013_29840421	3489-4423	47	69.82	61.35	1.151	1.722	1.806	5.563	1.824
1_January_24_2015_31819593.wav	3303-4088	2_December_28_2013_29906000	321-1273	46	64.28	78.41	1.173	1.614	2.142	5.138	1.809
1_January_24_2015_31819593.wav	3303-4088	2_December_28_2013_30255000	526-1421	50	66	54.39	1.159	1.712	1.972	5.441	1.849
1_January_24_2015_31819593.wav	3303-4088	2_December_28_2013_30355875	1822-2782	60	69.71	49.15	1.313	1.498	1.061	5.028	1.906
1_January_24_2015_31819593.wav	3303-4088	2_December_28_2013_30590203	949-1896	55	72.16	31.93	1.405	1.531	1.043	4.785	1.883
1_January_24_2015_31819593.wav	3303-4088	2_December_28_2013_30727765	2113-3061	43	70.56	46.21	1.365	1.424	1.202	5.034	1.764
1_January_24_2015_31819593.wav	3303-4088	2_December_28_2013_30660343	1622-2548	59	72.35	42.9	1.345	1.373	1.009	4.767	1.877
1_January_24_2015_31819593.wav	3303-4088	2_December_28_2013_31019921	2225-3162	46	74.04	51.66	1.554	1.466	1.07	5.002	1.988
1_January_24_2015_31819593.wav	3303-4088	2_December_28_2013_34969343	1502-2433	61	69.24	52.94	1.338	1.532	1.053	5.145	1.916
1_January_24_2015_31819593.wav	3303-4088	2_December_28_2013_29440765	1621-2578	55	69.11	43.27	1.305	1.533	1.048	4.965	1.955
1_January_24_2015_31819593.wav	3303-4088	2_December_28_2013_29632109	949-1882	51	72.21	53.57	1.339	1.498	1.018	4.947	1.864
1_January_24_2015_31819593.wav	3303-4088	2_December_28_2013_30167406	610-1553	55	70.93	71.63	1.386	1.745	1.162	5.304	1.921
1_January_24_2015_31819593.wav	3303-4088	2_December_28_2013_33339187	993-1937	57	69.22	39.28	1.655	1.514	1.176	5.195	2.044
			average	49.48

## Sheet: grey 147 vs green 13
tutor-green 13	green 13-duration	grey 147	grey 147-duration	% similarity	accuarcy	% sequential	Pitch diff	FM diff	Entropy diff	Goodness diff	AM diff
2_July_14_2014_25745484.wav	2137-2786	1_January_06_2014_25277734.wav	1806-2459	87	65.07	100	1.415	1.805	1.93	3.106	1.941
2_July_14_2014_25745484.wav	2137-2786	1_January_06_2014_25353484.wav	2587-3184	83	70.18	100	1.389	1.738	2.215	2.794	1.923
2_July_14_2014_25745484.wav	2137-2786	1_January_06_2014_25550390.wav	3219-3979	88	69.23	100	1.366	1.795	1.71	3.097	1.935
2_July_14_2014_25745484.wav	2137-2786	1_January_06_2014_25614015.wav	834-1473	70	69.23	25.39	1.501	1.892	1.877	3.337	1.977
2_July_14_2014_25745484.wav	2137-2786	1_January_06_2014_25984875.wav	3883-4532	86	63.97	100	1.403	1.763	1.89	3.112	1.985
2_July_14_2014_25745484.wav	2137-2786	1_January_06_2014_26149734.wav	3827-4472	69	69.16	56.82	1.462	1.826	1.821	3.269	1.988
2_July_14_2014_25745484.wav	2137-2786	1_January_06_2014_26432687.wav	2913-3551	84	68.24	100	1.344	1.798	1.944	2.944	1.873
2_July_14_2014_25745484.wav	2137-2786	1_January_06_2014_26545843.wav	3800-4442	76	64.47	100	1.428	1.828	2.261	2.967	1.976
2_July_14_2014_25745484.wav	2137-2786	1_January_06_2014_26901421.wav	1508-2153	85	66.74	100	1.378	1.763	1.743	3.098	1.912
2_July_14_2014_25745484.wav	2137-2786	1_January_06_2014_27289890.wav	823-1462	82	67.64	100	1.513	1.831	1.798	3.163	1.937
2_July_14_2014_25745484.wav	2137-2786	1_January_06_2014_27705968.wav	1565-2216	75	69.01	47.93	1.44	1.835	1.951	3.016	1.888
2_July_14_2014_25745484.wav	2137-2786	1_January_06_2014_27745312.wav	860-1504	89	69.98	100	1.337	1.739	1.719	2.901	1.89
2_July_14_2014_25745484.wav	2137-2786	1_January_06_2014_27974781.wav	2151-2778	86	64.1	100	1.45	1.816	2.135	2.989	1.922
2_July_14_2014_25745484.wav	2137-2786	1_January_06_2014_28127031.wav	876-1514	82	68.68	100	1.406	1.801	2.127	3.042	1.933
2_July_14_2014_25745484.wav	2137-2786	1_January_06_2014_28342453.wav	634-1271	84	65.26	100	1.392	1.814	2.09	2.734	1.874
2_July_14_2014_25745484.wav	2137-2786	1_January_06_2014_28817812.wav	1374-2020	86	69.8	100	1.435	1.821	1.901	2.908	1.991
2_July_14_2014_25745484.wav	2137-2786	1_January_06_2014_29248750.wav	1257-1908	72	69.99	24.76	1.475	1.899	1.626	3.029	2.032
2_July_14_2014_25745484.wav	2137-2786	1_January_06_2014_29306500.wav	851-1492	81	65.27	56.82	1.409	1.788	2.217	2.959	1.982
2_July_14_2014_25745484.wav	2137-2786	1_January_06_2014_29437656.wav	1302-1935	85	68.15	100	1.342	1.858	2.11	3.044	1.988
2_July_14_2014_25745484.wav	2137-2786	1_January_06_2014_29800328.wav	2708-3350	73	67.34	23.49	1.419	1.753	1.857	3.438	2.011
2_July_14_2014_25759765.wav	3037-3691	1_January_06_2014_25277734.wav	1806-2459	65	71.1	25.07	1.438	1.869	1.716	3.526	1.982
2_July_14_2014_25759765.wav	3037-3691	1_January_06_2014_25353484.wav	2587-3184	76	67.15	20.63	1.383	1.805	1.901	3.033	1.989
2_July_14_2014_25759765.wav	3037-3691	1_January_06_2014_25550390.wav	3110-3762	85	67.15	100	1.474	1.762	2.052	2.941	1.953
2_July_14_2014_25759765.wav	3037-3691	1_January_06_2014_25614015.wav	834-1473	76	67.75	15.55	1.538	1.877	2.468	2.892	1.89
2_July_14_2014_25759765.wav	3037-3691	1_January_06_2014_25984875.wav	3883-4532	89	78.76	100	1.322	1.932	1.765	3.64	1.893
2_July_14_2014_25759765.wav	3037-3691	1_January_06_2014_26149734.wav	3827-4472	89	74.16	100	1.372	1.878	1.916	3.478	2.044
2_July_14_2014_25759765.wav	3037-3691	1_January_06_2014_26432687.wav	2913-3551	78	78.46	85.87	1.301	1.946	1.663	3.805	1.935
2_July_14_2014_25759765.wav	3037-3691	1_January_06_2014_26545843.wav	3800-4442	89	74.03	100	1.415	2.018	1.716	3.863	2.015
2_July_14_2014_25759765.wav	3037-3691	1_January_06_2014_26901421.wav	1508-2153	78	77.55	85.87	1.253	1.874	1.791	3.517	1.986
2_July_14_2014_25759765.wav	3037-3691	1_January_06_2014_27289890.wav	823-1462	88	77.1	100	1.354	1.913	1.777	3.907	1.963
2_July_14_2014_25759765.wav	3037-3691	1_January_06_2014_27705968.wav	1565-2216	86	76.04	100	1.252	1.924	1.831	3.891	1.952
2_July_14_2014_25759765.wav	3037-3691	1_January_06_2014_27745312.wav	860-1504	87	74	100	1.291	1.99	2.123	3.556	1.999
2_July_14_2014_25759765.wav	3037-3691	1_January_06_2014_27974781.wav	2151-2778	86	74.23	100	1.269	1.889	1.813	3.709	1.974
2_July_14_2014_25759765.wav	3037-3691	1_January_06_2014_28127031.wav	876-1514	89	73.47	100	1.402	1.926	1.942	3.85	1.893
2_July_14_2014_25759765.wav	3037-3691	1_January_06_2014_28342453.wav	634-1271	89	73.57	100	1.344	1.937	1.68	3.714	1.926
2_July_14_2014_25759765.wav	3037-3691	1_January_06_2014_28817812.wav	1374-2020	83	71.89	83.53	1.315	1.913	1.685	3.725	2.013
2_July_14_2014_25759765.wav	3037-3691	1_January_06_2014_29248750.wav	1257-1908	89	70.58	100	1.477	1.893	1.876	3.564	2.043
2_July_14_2014_25759765.wav	3037-3691	1_January_06_2014_29306500.wav	851-1492	89	71.95	100	1.389	1.985	1.872	3.619	1.952
2_July_14_2014_25759765.wav	3037-3691	1_January_06_2014_29437656.wav	1302-1935	89	73.35	100	1.439	1.883	1.966	3.39	2.002
2_July_14_2014_25759765.wav	3037-3691	1_January_06_2014_29800328.wav	2708-3350	78	77.79	85.87	1.262	1.816	1.741	3.595	1.958
2_July_14_2014_25770515.wav	1968-2610	1_January_06_2014_25277734.wav	1806-2459	88	75.37	100	1.323	1.839	1.64	3.698	2.036
2_July_14_2014_25770515.wav	1968-2610	1_January_06_2014_25353484.wav	2587-3184	89	77.67	100	1.355	1.851	1.699	3.662	2.045
2_July_14_2014_25770515.wav	1968-2610	1_January_06_2014_25550390.wav	3110-3762	89	77.8	100	1.313	1.979	1.711	3.518	1.95
2_July_14_2014_25770515.wav	1968-2610	1_January_06_2014_25614015.wav	834-1473	88	76.04	100	1.37	1.916	1.807	3.761	1.958
2_July_14_2014_25770515.wav	1968-2610	1_January_06_2014_25984875.wav	3883-4532	88	73.87	100	1.348	2.021	1.69	3.902	2.025
2_July_14_2014_25770515.wav	1968-2610	1_January_06_2014_26149734.wav	3827-4472	89	71.9	100	1.326	2.003	1.398	3.723	2.048
2_July_14_2014_25770515.wav	1968-2610	1_January_06_2014_26432687.wav	2913-3551	89	75.23	100	1.385	1.881	1.811	3.604	1.985
2_July_14_2014_25770515.wav	1968-2610	1_January_06_2014_26545843.wav	3800-4442	84	71.77	82.18	1.351	1.858	1.545	3.833	1.984
2_July_14_2014_25770515.wav	1968-2610	1_January_06_2014_26901421.wav	1508-2153	89	70.78	100	1.322	2.097	1.953	3.867	2.01
2_July_14_2014_25770515.wav	1968-2610	1_January_06_2014_27289890.wav	823-1462	88	75.71	100	1.295	2.026	2.089	3.558	1.992
2_July_14_2014_25770515.wav	1968-2610	1_January_06_2014_27705968.wav	1565-2216	89	76.79	100	1.272	2.076	1.777	3.804	2.001
2_July_14_2014_25770515.wav	1968-2610	1_January_06_2014_27745312.wav	860-1504	88	71.67	100	1.413	2.175	1.836	4.018	2.043
2_July_14_2014_25770515.wav	1968-2610	1_January_06_2014_27974781.wav	2151-2778	89	68.6	100	1.299	2.043	1.899	3.797	2.045
2_July_14_2014_25770515.wav	1968-2610	1_January_06_2014_28127031.wav	876-1514	88	74.03	100	1.36	2.113	1.736	4	2.046
2_July_14_2014_25770515.wav	1968-2610	1_January_06_2014_28342453.wav	634-1271	89	74.04	100	1.251	2.084	1.878	3.754	1.937
2_July_14_2014_25770515.wav	1968-2610	1_January_06_2014_28817812.wav	1374-2020	88	71.82	100	1.33	2.114	2.116	3.75	2.039
2_July_14_2014_25770515.wav	1968-2610	1_January_06_2014_29248750.wav	1257-1908	89	73.63	100	1.286	2.045	1.731	3.847	1.976
2_July_14_2014_25770515.wav	1968-2610	1_January_06_2014_29306500.wav	851-1492	89	70.23	100	1.423	2.109	1.818	3.896	2
2_July_14_2014_25770515.wav	1968-2610	1_January_06_2014_29437656.wav	1302-1935	89	73.18	100	1.34	2.115	1.772	3.892	1.95
2_July_14_2014_25770515.wav	1968-2610	1_January_06_2014_29800328.wav	2708-3350	89	74.84	100	1.238	2.024	1.72	3.661	1.957
2_July_14_2014_25816234.wav	608-1258	1_January_06_2014_25277734.wav	1806-2459	89	71.04	100	1.297	2.095	1.939	3.561	1.934
2_July_14_2014_25816234.wav	608-1258	1_January_06_2014_25353484.wav	2587-3184	88	75.05	100	1.34	2.089	1.836	3.617	2.05
2_July_14_2014_25816234.wav	608-1258	1_January_06_2014_25550390.wav	3110-3762	88	72.85	100	1.382	2.169	1.623	3.633	2.09
2_July_14_2014_25816234.wav	608-1258	1_January_06_2014_25614015.wav	834-1473	89	71.74	100	1.315	2.077	2.059	3.794	2.045
2_July_14_2014_25816234.wav	608-1258	1_January_06_2014_25984875.wav	3883-4532	78	75.78	86.66	1.238	2.139	1.982	3.75	2.05
2_July_14_2014_25816234.wav	608-1258	1_January_06_2014_26149734.wav	3827-4472	89	71.82	100	1.317	2.035	1.815	4.022	2.073
2_July_14_2014_25816234.wav	608-1258	1_January_06_2014_26432687.wav	2913-3551	85	71.6	100	1.445	2.16	2.202	3.752	1.947
2_July_14_2014_25816234.wav	608-1258	1_January_06_2014_26545843.wav	3800-4442	88	71.05	100	1.343	1.895	1.996	3.852	2.002
2_July_14_2014_25816234.wav	608-1258	1_January_06_2014_26901421.wav	1508-2153	87	70.22	100	1.341	2.166	1.865	4.071	2.05
2_July_14_2014_25816234.wav	608-1258	1_January_06_2014_27289890.wav	823-1462	89	71.08	100	1.276	2.096	1.879	3.794	2.053
2_July_14_2014_25816234.wav	608-1258	1_January_06_2014_27705968.wav	1565-2216	88	73.71	100	1.376	2.043	1.915	3.736	2.01
2_July_14_2014_25816234.wav	608-1258	1_January_06_2014_27745312.wav	860-1504	84	77.41	100	1.134	1.691	1.769	3.461	1.839
2_July_14_2014_25816234.wav	608-1258	1_January_06_2014_27974781.wav	2151-2778	78	70.27	85.04	1.169	1.772	1.864	3.516	1.745
2_July_14_2014_25816234.wav	608-1258	1_January_06_2014_28127031.wav	876-1514	89	72.77	100	1.155	1.76	1.828	3.36	1.903
2_July_14_2014_25816234.wav	608-1258	1_January_06_2014_28342453.wav	634-1271	78	76.34	85.04	1.178	1.839	1.763	3.741	1.796
2_July_14_2014_25816234.wav	608-1258	1_January_06_2014_28817812.wav	1374-2020	89	71.63	100	1.201	1.941	1.799	3.849	1.875
2_July_14_2014_25816234.wav	608-1258	1_January_06_2014_29248750.wav	1257-1908	78	71.57	85.04	1.154	1.811	1.829	3.448	1.83
2_July_14_2014_25816234.wav	608-1258	1_January_06_2014_29306500.wav	851-1492	89	77.3	100	1.167	1.746	1.834	3.685	1.834
2_July_14_2014_25816234.wav	608-1258	1_January_06_2014_29437656.wav	1302-1935	89	74.88	100	1.087	1.76	1.874	3.644	1.816
2_July_14_2014_25816234.wav	608-1258	1_January_06_2014_29800328.wav	2708-3350	89	73.31	100	1.215	1.797	2.022	3.349	1.862
2_July_14_2014_25829140.wav	3251-3901	1_January_06_2014_25277734.wav	1806-2459	89	76.78	100	1.15	1.742	1.609	3.498	1.779
2_July_14_2014_25829140.wav	3251-3901	1_January_06_2014_25353484.wav	2587-3184	82	72.43	84.1	1.169	1.823	1.738	3.733	1.865
2_July_14_2014_25829140.wav	3251-3901	1_January_06_2014_25550390.wav	3110-3762	77	75.52	85.04	1.273	1.701	1.791	3.243	1.892
2_July_14_2014_25829140.wav	3251-3901	1_January_06_2014_25614015.wav	834-1473	88	71.05	100	1.263	1.812	1.77	3.373	1.811
2_July_14_2014_25829140.wav	3251-3901	1_January_06_2014_25984875.wav	3883-4532	89	77.08	100	1.232	1.714	1.939	3.145	1.874
2_July_14_2014_25829140.wav	3251-3901	1_January_06_2014_26149734.wav	3827-4472	81	70.94	87.22	1.194	1.708	1.833	3.545	1.822
2_July_14_2014_25829140.wav	3251-3901	1_January_06_2014_26432687.wav	2913-3551	83	70.09	82.84	1.181	1.804	1.686	3.852	1.876
2_July_14_2014_25829140.wav	3251-3901	1_January_06_2014_26545843.wav	3800-4442	85	73.11	100	1.122	1.748	1.916	3.379	1.853
2_July_14_2014_25829140.wav	3251-3901	1_January_06_2014_26901421.wav	1508-2153	77	78.54	100	1.145	1.79	1.642	3.534	1.901
2_July_14_2014_25829140.wav	3251-3901	1_January_06_2014_27289890.wav	823-1462	89	70.88	100	1.174	1.829	1.683	3.742	1.939
2_July_14_2014_25829140.wav	3251-3901	1_January_06_2014_27705968.wav	1565-2216	89	76.54	100	1.128	1.824	1.772	3.586	1.785
2_July_14_2014_25829140.wav	3251-3901	1_January_06_2014_27745312.wav	860-1504	89	76.4	100	1.184	1.755	1.824	3.728	1.802
2_July_14_2014_25829140.wav	3251-3901	1_January_06_2014_27974781.wav	2151-2778	83	67.57	80.92	1.182	1.92	1.802	4.168	1.922
2_July_14_2014_25829140.wav	3251-3901	1_January_06_2014_28127031.wav	876-1514	88	72.38	100	1.148	1.876	1.551	3.614	1.908
2_July_14_2014_25829140.wav	3251-3901	1_January_06_2014_28342453.wav	634-1271	82	73.23	100	1.145	1.727	1.745	3.422	1.821
2_July_14_2014_25829140.wav	3251-3901	1_January_06_2014_28817812.wav	1374-2020	83	75.11	100	0.913	1.862	1.757	3.776	1.905
2_July_14_2014_25829140.wav	3251-3901	1_January_06_2014_29248750.wav	1257-1908	83	67.42	56.66	1.029	1.879	1.754	3.728	1.845
2_July_14_2014_25829140.wav	3251-3901	1_January_06_2014_29306500.wav	851-1492	89	74.87	100	1.01	1.846	1.811	3.414	1.853
2_July_14_2014_25829140.wav	3251-3901	1_January_06_2014_29437656.wav	1302-1935	86	70.97	50.24	0.998	1.93	1.649	3.828	1.856
2_July_14_2014_25829140.wav	3251-3901	1_January_06_2014_29800328.wav	2708-3350	89	75.25	100	1.063	2.009	1.644	3.911	1.904
2_July_14_2014_25838718.wav	2918-3564	1_January_06_2014_25277734.wav	1806-2459	89	74.35	100	0.966	1.876	1.626	3.53	1.798
2_July_14_2014_25838718.wav	2918-3564	1_January_06_2014_25353484.wav	2587-3184	84	75.86	100	0.917	1.83	1.813	3.537	1.895
2_July_14_2014_25838718.wav	2918-3564	1_January_06_2014_25550390.wav	3110-3762	83	78.34	100	0.972	1.847	1.53	3.792	1.849
2_July_14_2014_25838718.wav	2918-3564	1_January_06_2014_25614015.wav	834-1473	89	73.08	100	1.074	1.91	1.674	3.792	1.854
2_July_14_2014_25838718.wav	2918-3564	1_January_06_2014_25984875.wav	3883-4532	89	74.07	100	1.01	1.812	1.44	3.685	1.806
2_July_14_2014_25838718.wav	2918-3564	1_January_06_2014_26149734.wav	3827-4472	82	76.24	100	0.991	1.891	1.564	3.507	1.811
2_July_14_2014_25838718.wav	2918-3564	1_January_06_2014_26432687.wav	2913-3551	75	65.2	73.35	1.131	1.826	1.58	3.601	1.842
2_July_14_2014_25838718.wav	2918-3564	1_January_06_2014_26545843.wav	3800-4442	89	73.77	100	1.038	1.836	1.671	3.625	1.864
2_July_14_2014_25838718.wav	2918-3564	1_January_06_2014_26901421.wav	1508-2153	89	74.69	100	0.956	1.835	1.584	3.461	1.79
2_July_14_2014_25838718.wav	2918-3564	1_January_06_2014_27289890.wav	823-1462	89	75.47	100	1.096	1.934	1.604	3.785	1.916
2_July_14_2014_25838718.wav	2918-3564	1_January_06_2014_27705968.wav	1565-2216	89	74.3	100	1.096	2.059	1.464	3.578	1.993
2_July_14_2014_25838718.wav	2918-3564	1_January_06_2014_27745312.wav	860-1504	89	75.84	100	0.992	1.86	1.701	3.533	1.884
2_July_14_2014_25838718.wav	2918-3564	1_January_06_2014_27974781.wav	2151-2778	71	60.88	65.97	0.937	1.971	1.665	3.683	1.901
2_July_14_2014_25838718.wav	2918-3564	1_January_06_2014_28127031.wav	876-1514	89	75.57	100	1.012	1.92	1.58	4.039	1.966
2_July_14_2014_25838718.wav	2918-3564	1_January_06_2014_28342453.wav	634-1271	86	78.03	100	1.083	1.839	1.765	3.625	1.829
2_July_14_2014_25838718.wav	2918-3564	1_January_06_2014_28817812.wav	1374-2020	72	64.77	65.97	1.073	1.719	1.709	3.696	1.859
2_July_14_2014_25838718.wav	2918-3564	1_January_06_2014_29248750.wav	1257-1908	78	71.34	82.98	1.025	1.986	1.66	4.134	1.946
2_July_14_2014_25838718.wav	2918-3564	1_January_06_2014_29306500.wav	851-1492	89	75.06	100	1.003	1.869	1.689	3.661	1.907
2_July_14_2014_25838718.wav	2918-3564	1_January_06_2014_29437656.wav	1302-1935	89	74.94	100	1.001	1.795	1.574	3.564	1.848
2_July_14_2014_25838718.wav	2918-3564	1_January_06_2014_29800328.wav	2708-3350	77	68.43	85.41	1.009	1.869	1.766	3.606	1.724
2_July_14_2014_25893984.wav	1049-1696	1_January_06_2014_25277734.wav	1806-2459	77	75.88	85.41	1.002	1.935	1.673	3.723	1.779
2_July_14_2014_25893984.wav	1049-1696	1_January_06_2014_25353484.wav	2587-3184	89	70.42	100	1.036	2.031	1.699	3.817	1.857
2_July_14_2014_25893984.wav	1049-1696	1_January_06_2014_25550390.wav	3110-3762	81	69.49	87.54	0.956	1.904	1.721	3.457	1.809
2_July_14_2014_25893984.wav	1049-1696	1_January_06_2014_25614015.wav	834-1473	89	76.51	100	1.001	1.849	1.734	3.785	1.82
2_July_14_2014_25893984.wav	1049-1696	1_January_06_2014_25984875.wav	3883-4532	89	74.05	100	0.906	1.86	1.771	3.711	1.794
2_July_14_2014_25893984.wav	1049-1696	1_January_06_2014_26149734.wav	3827-4472	88	70.75	100	1.031	1.891	1.895	3.396	1.844
2_July_14_2014_25893984.wav	1049-1696	1_January_06_2014_26432687.wav	2913-3551	87	75.97	100	0.972	1.788	1.648	3.563	1.82
2_July_14_2014_25893984.wav	1049-1696	1_January_06_2014_26545843.wav	3800-4442	88	69.19	100	0.984	1.872	1.758	3.695	1.735
2_July_14_2014_25893984.wav	1049-1696	1_January_06_2014_26901421.wav	1508-2153	93	78.1	100	0.979	1.835	1.473	3.612	1.759
2_July_14_2014_25893984.wav	1049-1696	1_January_06_2014_27289890.wav	823-1462	81	72.77	85.67	0.985	1.909	1.629	3.752	1.842
2_July_14_2014_25893984.wav	1049-1696	1_January_06_2014_27705968.wav	1565-2216	77	71.73	85.41	1.116	1.795	1.653	3.361	1.867
2_July_14_2014_25893984.wav	1049-1696	1_January_06_2014_27745312.wav	860-1504	82	70.9	100	1.092	1.908	1.633	3.454	1.789
2_July_14_2014_25893984.wav	1049-1696	1_January_06_2014_27974781.wav	2151-2778	89	75.58	100	1.076	1.798	1.806	3.237	1.851
2_July_14_2014_25893984.wav	1049-1696	1_January_06_2014_28127031.wav	876-1514	81	68.12	88.16	1.034	1.794	1.73	3.617	1.802
2_July_14_2014_25893984.wav	1049-1696	1_January_06_2014_28342453.wav	634-1271	82	70.46	83.18	1.011	1.882	1.604	3.789	1.854
2_July_14_2014_25893984.wav	1049-1696	1_January_06_2014_28817812.wav	1374-2020	80	75.85	100	0.923	1.843	1.805	3.475	1.832
2_July_14_2014_25893984.wav	1049-1696	1_January_06_2014_29248750.wav	1257-1908	87	71.82	100	0.968	1.869	1.522	3.546	1.874
2_July_14_2014_25893984.wav	1049-1696	1_January_06_2014_29306500.wav	851-1492	88	70.94	100	0.99	1.908	1.57	3.713	1.923
2_July_14_2014_25893984.wav	1049-1696	1_January_06_2014_29437656.wav	1302-1935	81	77.67	100	0.939	1.921	1.682	3.659	1.764
2_July_14_2014_25893984.wav	1049-1696	1_January_06_2014_29800328.wav	2708-3350	87	76.96	100	1.003	1.852	1.711	3.761	1.78
2_July_14_2014_25899062.wav	1821-2471	1_January_06_2014_25277734.wav	1806-2459	88	71.49	100	0.975	1.821	1.617	3.489	1.801
2_July_14_2014_25899062.wav	1821-2471	1_January_06_2014_25353484.wav	2587-3184	82	68.36	81.31	1.005	2.001	1.737	4.047	1.905
2_July_14_2014_25899062.wav	1821-2471	1_January_06_2014_25550390.wav	3110-3762	89	73.47	100	1.07	1.938	2.149	3.72	1.809
2_July_14_2014_25899062.wav	1821-2471	1_January_06_2014_25614015.wav	834-1473	89	71.73	100	1.038	1.907	2.14	3.408	1.814
2_July_14_2014_25899062.wav	1821-2471	1_January_06_2014_25984875.wav	3883-4532	89	76.5	100	1.023	1.985	2.058	3.81	1.812
2_July_14_2014_25899062.wav	1821-2471	1_January_06_2014_26149734.wav	3827-4472	89	70.77	100	1.091	2.063	2.004	3.95	1.866
2_July_14_2014_25899062.wav	1821-2471	1_January_06_2014_26432687.wav	2913-3551	84	70.07	100	0.959	1.919	2.151	3.81	1.866
2_July_14_2014_25899062.wav	1821-2471	1_January_06_2014_26545843.wav	3800-4442	89	75.55	100	1.056	1.929	1.814	3.889	1.853
2_July_14_2014_25899062.wav	1821-2471	1_January_06_2014_26901421.wav	1508-2153	89	69.18	100	0.99	1.935	1.987	3.509	1.759
2_July_14_2014_25899062.wav	1821-2471	1_January_06_2014_27289890.wav	823-1462	88	75.61	100	0.966	1.88	2.125	3.526	1.853
2_July_14_2014_25899062.wav	1821-2471	1_January_06_2014_27705968.wav	1565-2216	89	76.42	100	1.002	1.906	1.911	3.781	1.813
2_July_14_2014_25899062.wav	1821-2471	1_January_06_2014_27745312.wav	860-1504	89	74.46	100	1.098	1.966	2.069	3.78	1.81
2_July_14_2014_25899062.wav	1821-2471	1_January_06_2014_27974781.wav	2151-2778	89	78.39	100	1.037	1.862	1.761	3.617	1.771
2_July_14_2014_25899062.wav	1821-2471	1_January_06_2014_28127031.wav	876-1514	92	78.37	100	1.027	1.954	1.951	3.486	1.774
2_July_14_2014_25899062.wav	1821-2471	1_January_06_2014_28342453.wav	634-1271	78	72.56	87.36	1.156	1.874	1.885	3.549	1.8
2_July_14_2014_25899062.wav	1821-2471	1_January_06_2014_28817812.wav	1374-2020	79	77.12	100	1.066	1.89	2.01	3.61	1.826
2_July_14_2014_25899062.wav	1821-2471	1_January_06_2014_29248750.wav	1257-1908	89	77.14	100	1.001	1.894	1.913	3.403	1.757
2_July_14_2014_25899062.wav	1821-2471	1_January_06_2014_29306500.wav	851-1492	89	75.36	100	1.112	1.988	1.967	3.776	1.874
2_July_14_2014_25899062.wav	1821-2471	1_January_06_2014_29437656.wav	1302-1935	89	69.66	100	1.113	2.125	1.85	3.665	1.95
2_July_14_2014_25899062.wav	1821-2471	1_January_06_2014_29800328.wav	2708-3350	85	74.91	100	1.024	1.909	2.008	3.51	1.842
2_July_14_2014_25911453.wav	940-1583	1_January_06_2014_25277734.wav	1806-2459	89	77.18	100	1.11	1.884	2.044	3.565	1.789
2_July_14_2014_25911453.wav	940-1583	1_January_06_2014_25353484.wav	2587-3184	78	74.89	87.36	1.089	1.784	2.067	3.649	1.819
2_July_14_2014_25911453.wav	940-1583	1_January_06_2014_25550390.wav	3110-3762	84	63.75	80.28	1.065	2.056	2.091	4.268	1.91
2_July_14_2014_25911453.wav	940-1583	1_January_06_2014_25614015.wav	834-1473	89	68.66	100	1.047	1.923	2.073	3.632	1.866
2_July_14_2014_25911453.wav	940-1583	1_January_06_2014_25984875.wav	3883-4532	84	71.82	100	1.033	1.854	1.899	3.543	1.814
2_July_14_2014_25911453.wav	940-1583	1_January_06_2014_26149734.wav	3827-4472	81	67.24	100	1.049	1.987	1.947	4.142	1.926
2_July_14_2014_25911453.wav	940-1583	1_January_06_2014_26432687.wav	2913-3551	81	68.87	84.95	1.141	2.065	2.075	3.606	1.723
2_July_14_2014_25911453.wav	940-1583	1_January_06_2014_26545843.wav	3800-4442	89	69.69	100	1.136	2.034	1.944	3.435	1.88
2_July_14_2014_25911453.wav	940-1583	1_January_06_2014_26901421.wav	1508-2153	77	73.5	84.95	1.157	2.12	1.983	3.79	1.776
2_July_14_2014_25911453.wav	940-1583	1_January_06_2014_27289890.wav	823-1462	87	68.87	100	1.176	2.198	1.978	3.876	1.851
2_July_14_2014_25911453.wav	940-1583	1_January_06_2014_27705968.wav	1565-2216	82	69.55	67.04	1.137	2.094	2	3.494	1.805
2_July_14_2014_25911453.wav	940-1583	1_January_06_2014_27745312.wav	860-1504	89	73.52	100	1.144	2.047	2.011	3.775	1.81
2_July_14_2014_25911453.wav	940-1583	1_January_06_2014_27974781.wav	2151-2778	89	70.05	100	1.066	2.059	2.063	3.724	1.798
2_July_14_2014_25911453.wav	940-1583	1_January_06_2014_28127031.wav	876-1514	83	69.34	100	1.195	2.089	2.121	3.417	1.84
2_July_14_2014_25911453.wav	940-1583	1_January_06_2014_28342453.wav	634-1271	89	73.56	100	1.107	1.983	1.897	3.581	1.812
2_July_14_2014_25911453.wav	940-1583	1_January_06_2014_28817812.wav	1374-2020	89	66.89	100	1.158	2.08	2.004	3.704	1.735
2_July_14_2014_25911453.wav	940-1583	1_January_06_2014_29248750.wav	1257-1908	87	75.91	100	1.122	2.042	1.711	3.612	1.758
2_July_14_2014_25911453.wav	940-1583	1_January_06_2014_29306500.wav	851-1492	83	69.8	80.5	1.149	2.092	1.916	3.814	1.842
2_July_14_2014_25911453.wav	940-1583	1_January_06_2014_29437656.wav	1302-1935	88	73.15	100	1.24	1.998	1.873	3.347	1.864
2_July_14_2014_25911453.wav	940-1583	1_January_06_2014_29800328.wav	2708-3350	88	69.42	100	1.24	2.113	1.865	3.462	1.791
2_July_14_2014_25986437.wav	2113-2764	1_January_06_2014_25277734.wav	1806-2459	84	67.45	77.43	1.159	2.037	1.946	3.867	1.858
2_July_14_2014_25986437.wav	2113-2764	1_January_06_2014_25353484.wav	2587-3184	85	72.45	100	1.104	2.045	2.078	3.51	1.825
2_July_14_2014_25986437.wav	2113-2764	1_January_06_2014_25550390.wav	3110-3762	68	75.8	100	1.123	2.04	1.795	3.582	1.88
2_July_14_2014_25986437.wav	2113-2764	1_January_06_2014_25614015.wav	834-1473	89	66.91	100	1.16	2.071	1.844	3.787	1.929
2_July_14_2014_25986437.wav	2113-2764	1_January_06_2014_25984875.wav	3883-4532	89	73.41	100	1.112	2.129	2	3.676	1.766
2_July_14_2014_25986437.wav	2113-2764	1_January_06_2014_26149734.wav	3827-4472	86	74.16	100	1.161	2.047	1.986	3.784	1.777
2_July_14_2014_25986437.wav	2113-2764	1_January_06_2014_26432687.wav	2913-3551	84	63.36	77.36	1.161	2.154	2.099	4.151	1.9
2_July_14_2014_25986437.wav	2113-2764	1_January_06_2014_26545843.wav	3800-4442	89	71.27	100	1.13	2.189	1.809	3.702	1.885
2_July_14_2014_25986437.wav	2113-2764	1_January_06_2014_26901421.wav	1508-2153	89	68.62	100	1.124	2.017	1.855	3.5	1.804
2_July_14_2014_25986437.wav	2113-2764	1_January_06_2014_27289890.wav	823-1462	83	77.91	100	1.042	1.664	1.58	3.684	1.88
2_July_14_2014_25986437.wav	2113-2764	1_January_06_2014_27705968.wav	1565-2216	78	73.13	82.13	1.069	1.696	1.879	3.687	1.844
2_July_14_2014_25986437.wav	2113-2764	1_January_06_2014_27745312.wav	860-1504	89	75.03	100	1.046	1.685	1.806	3.519	2.005
2_July_14_2014_25986437.wav	2113-2764	1_January_06_2014_27974781.wav	2151-2778	73	63.26	52.47	1.068	1.766	1.787	3.823	1.894
2_July_14_2014_25986437.wav	2113-2764	1_January_06_2014_28127031.wav	876-1514	89	74.57	100	1.097	1.862	1.804	3.937	1.974
2_July_14_2014_25986437.wav	2113-2764	1_January_06_2014_28342453.wav	634-1271	81	75.02	82.13	1.028	1.732	1.825	3.566	1.926
2_July_14_2014_25986437.wav	2113-2764	1_January_06_2014_28817812.wav	1374-2020	88	73.36	100	1.062	1.675	1.839	3.869	1.937
2_July_14_2014_25986437.wav	2113-2764	1_January_06_2014_29248750.wav	1257-1908	84	76.18	100	0.972	1.685	1.879	3.806	1.915
2_July_14_2014_25986437.wav	2113-2764	1_January_06_2014_29306500.wav	851-1492	89	74.37	100	1.099	1.724	1.991	3.486	1.962
2_July_14_2014_25986437.wav	2113-2764	1_January_06_2014_29437656.wav	1302-1935	82	77.16	100	1.029	1.612	1.748	3.654	1.933
2_July_14_2014_25986437.wav	2113-2764	1_January_06_2014_29800328.wav	2708-3350	85	73.22	100	1.053	1.699	1.862	3.785	1.855
				85.04

## Sheet: grey 180 vs blue 63
blue 63	blue 63-duration	grey 180	duration-grey 180	% similarity	accuarcy	% sequential	Pitch diff	FM diff	Entropy diff	Goodness diff	AM diff
1_June_29_2012_30198093	2391-3239	4_February_25_2014_31163140	2458-3263	87	80.5	100	1.996	1.707	2.409	4.698	2.478
1_June_29_2012_30198093	2391-3239	4_February_25_2014_32555062	1602-2420	87	80.5	100	1.997	1.705	2.411	4.699	2.476
1_June_29_2012_30198093	2391-3239	4_February_25_2014_32637312	731-1546	85	80.45	100	1.543	1.634	2.049	4.837	2.405
1_June_29_2012_30198093	2391-3239	4_February_25_2014_34187781	1171-1973	85	78.13	100	1.719	1.536	2.213	4.663	2.42
1_June_29_2012_30198093	2391-3239	4_February_25_2014_35801078	217-1025	86	82.49	100	1.76	1.742	2.08	4.873	2.402
1_June_29_2012_30198093	2391-3239	4_February_25_2014_35806187	1737-2573	88	79.77	100	1.7	1.768	2.28	4.497	2.49
1_June_29_2012_30198093	2391-3239	4_February_25_2014_35889625	3926-4745	87	80.73	100	1.753	1.682	2.072	4.752	2.417
1_June_29_2012_30198093	2391-3239	4_February_25_2014_35961265	3857-4676	87	79.57	100	1.709	1.617	2.153	4.795	2.452
1_June_29_2012_30198093	2391-3239	4_February_25_2014_36015109	3698-4513	82	83.92	100	1.672	1.695	1.976	4.835	2.303
1_June_29_2012_30198093	2391-3239	4_February_25_2014_36020187	277-1054	85	81.98	100	1.597	1.663	2.073	5.03	2.329
1_June_29_2012_30198093	2391-3239	4_February_25_2014_36320234	565-1383	86	82.96	100	1.716	1.667	1.974	4.933	2.334
1_June_29_2012_30198093	2391-3239	4_February_25_2014_36819593	509-1319	86	81.39	100	1.701	1.658	2.01	4.798	2.373
1_June_29_2012_30198093	2391-3239	4_February_25_2014_36854203	1095-1927	85	80.13	100	1.631	1.694	2.081	4.77	2.425
1_June_29_2012_30198093	2391-3239	4_February_25_2014_38315750	1078-1879	82	82.89	100	1.778	1.712	2.074	4.902	2.385
1_June_29_2012_30198093	2391-3239	4_February_25_2014_38735406	3491-4297	77	77.86	100	1.426	1.589	2.159	4.702	2.44
1_June_29_2012_30198093	2391-3239	4_February_25_2014_38772359	2028-2853	81	84	100	1.55	1.649	1.961	4.906	2.347
1_June_29_2012_30198093	2391-3239	4_February_25_2014_38919687	2767-3582	88	78.15	100	1.844	1.625	2.231	5.078	2.319
1_June_29_2012_30198093	2391-3239	4_February_25_2014_38924765	2584-3432	85	79.41	100	1.677	1.609	2.115	4.851	2.354
1_June_29_2012_30198093	2391-3239	4_February_25_2014_39042281	2197-3022	87	79.41	100	1.706	1.618	2.156	4.805	2.444
1_June_29_2012_30198093	2391-3239	4_February_25_2014_39085781	2268-3102	86	81.44	100	1.701	1.654	2.013	4.803	2.356
1_June_29_2012_30493296	3559-4423	4_February_25_2014_31163140	2458-3263	83	85.14	100	0.979	1.592	1.56	3.841	1.535
1_June_29_2012_30493296	3559-4423	4_February_25_2014_32555062	1602-2420	77	85.1	100	0.92	1.487	1.67	3.715	1.454
1_June_29_2012_30493296	3559-4423	4_February_25_2014_32637312	731-1546	80	85.22	100	0.936	1.579	1.611	3.84	1.467
1_June_29_2012_30493296	3559-4423	4_February_25_2014_34187781	1171-1973	79	87.22	100	0.984	1.657	1.422	3.657	1.607
1_June_29_2012_30493296	3559-4423	4_February_25_2014_35801078	217-1025	88	85.69	100	0.969	1.639	1.513	3.717	1.528
1_June_29_2012_30493296	3559-4423	4_February_25_2014_35806187	1737-2573	77	83.25	100	0.872	1.611	1.668	3.678	1.464
1_June_29_2012_30493296	3559-4423	4_February_25_2014_35889625	3926-4745	88	85.71	100	0.954	1.634	1.55	4.055	1.548
1_June_29_2012_30493296	3559-4423	4_February_25_2014_35961265	3857-4676	82	82.81	100	0.941	1.754	1.724	3.543	1.587
1_June_29_2012_30493296	3559-4423	4_February_25_2014_36015109	3698-4513	80	83.58	100	1.04	1.654	2.068	3.679	1.53
1_June_29_2012_30493296	3559-4423	4_February_25_2014_36020187	277-1054	87	81.24	100	0.985	1.561	1.676	3.604	1.525
1_June_29_2012_30493296	3559-4423	4_February_25_2014_36320234	565-1383	83	85.83	100	0.917	1.724	1.605	3.824	1.513
1_June_29_2012_30493296	3559-4423	4_February_25_2014_36819593	509-1319	80	86.98	100	1.013	1.735	1.64	4.068	1.591
1_June_29_2012_30493296	3559-4423	4_February_25_2014_36854203	1095-1927	80	84.68	100	1.059	1.643	1.59	3.695	1.501
1_June_29_2012_30493296	3559-4423	4_February_25_2014_38315750	1078-1879	81	85.53	100	1.033	1.631	1.55	3.694	1.522
1_June_29_2012_30493296	3559-4423	4_February_25_2014_38735406	3491-4297	88	82.32	100	0.968	1.591	1.586	3.806	1.479
1_June_29_2012_30493296	3559-4423	4_February_25_2014_38772359	2028-2853	77	84.54	100	0.962	1.563	1.853	3.76	1.544
1_June_29_2012_30493296	3559-4423	4_February_25_2014_38919687	2767-3582	86	86.97	100	0.93	1.721	1.688	3.915	1.574
1_June_29_2012_30493296	3559-4423	4_February_25_2014_38924765	2584-3432	80	84.2	100	0.898	1.598	1.685	3.821	1.483
1_June_29_2012_30493296	3559-4423	4_February_25_2014_39042281	2197-3022	77	84.4	100	0.942	1.665	1.933	3.631	1.547
1_June_29_2012_30493296	3559-4423	4_February_25_2014_39085781	2268-3102	83	82.84	100	0.999	1.7	1.445	3.776	1.65
1_June_29_2012_32519515	1194-2079	4_February_25_2014_31163140	2458-3263	83	85.43	100	0.975	1.702	1.622	3.749	1.594
1_June_29_2012_32519515	1194-2079	4_February_25_2014_32555062	1602-2420	80	86.74	100	0.914	1.602	1.764	3.588	1.514
1_June_29_2012_32519515	1194-2079	4_February_25_2014_32637312	731-1546	80	83.67	100	0.928	1.688	1.683	3.733	1.534
1_June_29_2012_32519515	1194-2079	4_February_25_2014_34187781	1171-1973	80	87.83	100	0.967	1.761	1.496	3.566	1.667
1_June_29_2012_32519515	1194-2079	4_February_25_2014_35801078	217-1025	90	82.23	100	0.966	1.748	1.655	3.637	1.589
1_June_29_2012_32519515	1194-2079	4_February_25_2014_35806187	1737-2573	79	84.37	100	0.863	1.718	1.738	3.557	1.513
1_June_29_2012_32519515	1194-2079	4_February_25_2014_35889625	3926-4745	90	84.67	100	0.948	1.747	1.609	3.955	1.606
1_June_29_2012_32519515	1194-2079	4_February_25_2014_35961265	3857-4676	80	84.91	100	0.94	1.86	1.743	3.463	1.647
1_June_29_2012_32519515	1194-2079	4_February_25_2014_36015109	3698-4513	83	81.95	100	1.034	1.77	2.09	3.561	1.595
1_June_29_2012_32519515	1194-2079	4_February_25_2014_36020187	277-1054	84	82.46	100	0.972	1.671	1.766	3.47	1.578
1_June_29_2012_32519515	1194-2079	4_February_25_2014_36320234	565-1383	84	83.5	100	0.904	1.83	1.696	3.713	1.58
1_June_29_2012_32519515	1194-2079	4_February_25_2014_36819593	509-1319	80	85.65	100	1	1.838	1.729	3.997	1.64
1_June_29_2012_32519515	1194-2079	4_February_25_2014_36854203	1095-1927	80	84.49	100	1.047	1.748	1.654	3.559	1.547
1_June_29_2012_32519515	1194-2079	4_February_25_2014_38315750	1078-1879	84	84.68	100	1.014	1.719	1.63	3.602	1.576
1_June_29_2012_32519515	1194-2079	4_February_25_2014_38735406	3491-4297	83	83.72	100	0.949	1.7	1.67	3.685	1.533
1_June_29_2012_32519515	1194-2079	4_February_25_2014_38772359	2028-2853	80	86.28	100	0.953	1.666	1.898	3.626	1.588
1_June_29_2012_32519515	1194-2079	4_February_25_2014_38919687	2767-3582	80	85.42	100	0.924	1.826	1.77	3.848	1.64
1_June_29_2012_32519515	1194-2079	4_February_25_2014_38924765	2584-3432	80	85.26	100	0.893	1.708	1.758	3.731	1.537
1_June_29_2012_32519515	1194-2079	4_February_25_2014_39042281	2197-3022	80	85.61	100	0.935	1.765	1.962	3.495	1.602
1_June_29_2012_32519515	1194-2079	4_February_25_2014_39085781	2268-3102	79	82.53	100	0.985	1.803	1.558	3.71	1.703
1_June_29_2012_32846843	301-1176	4_February_25_2014_31163140	2458-3263	79	85.07	83.76	0.896	1.668	1.622	3.862	1.588
1_June_29_2012_32846843	301-1176	4_February_25_2014_32555062	1602-2420	71	83.2	84.07	0.842	1.586	1.701	3.855	1.504
1_June_29_2012_32846843	301-1176	4_February_25_2014_32637312	731-1546	75	82.76	84.07	0.856	1.659	1.663	3.941	1.503
1_June_29_2012_32846843	301-1176	4_February_25_2014_34187781	1171-1973	80	85.82	100	0.916	1.71	1.468	3.684	1.686
1_June_29_2012_32846843	301-1176	4_February_25_2014_35801078	217-1025	87	88.17	100	0.89	1.714	1.494	3.693	1.596
1_June_29_2012_32846843	301-1176	4_February_25_2014_35806187	1737-2573	77	79.79	100	0.794	1.708	1.717	3.8	1.53
1_June_29_2012_32846843	301-1176	4_February_25_2014_35889625	3926-4745	87	82.47	100	0.875	1.735	1.618	4.112	1.614
1_June_29_2012_32846843	301-1176	4_February_25_2014_35961265	3857-4676	84	83.81	100	0.872	1.811	1.825	3.552	1.655
1_June_29_2012_32846843	301-1176	4_February_25_2014_36015109	3698-4513	85	82.33	84.37	0.962	1.759	2.165	3.791	1.597
1_June_29_2012_32846843	301-1176	4_February_25_2014_36020187	277-1054	79	81.04	84.37	0.913	1.651	1.704	3.745	1.585
1_June_29_2012_32846843	301-1176	4_February_25_2014_36320234	565-1383	84	83.58	100	0.837	1.79	1.628	3.89	1.585
1_June_29_2012_32846843	301-1176	4_February_25_2014_36819593	509-1319	83	85.23	100	0.941	1.793	1.677	4.001	1.655
1_June_29_2012_32846843	301-1176	4_February_25_2014_36854203	1095-1927	76	80.97	100	0.985	1.742	1.657	3.875	1.565
1_June_29_2012_32846843	301-1176	4_February_25_2014_38315750	1078-1879	81	82.15	100	0.964	1.696	1.583	3.72	1.592
1_June_29_2012_32846843	301-1176	4_February_25_2014_38735406	3491-4297	82	77.04	100	0.903	1.673	1.623	3.929	1.531
1_June_29_2012_32846843	301-1176	4_February_25_2014_38772359	2028-2853	72	82.58	84.99	0.891	1.648	1.93	3.905	1.607
1_June_29_2012_32846843	301-1176	4_February_25_2014_38919687	2767-3582	89	87.14	100	0.849	1.801	1.719	3.89	1.644
1_June_29_2012_32846843	301-1176	4_February_25_2014_38924765	2584-3432	75	87.61	83.76	0.827	1.683	1.728	3.882	1.548
1_June_29_2012_32846843	301-1176	4_February_25_2014_39042281	2197-3022	82	83.31	84.37	0.871	1.734	2.032	3.771	1.611
1_June_29_2012_32846843	301-1176	4_February_25_2014_39085781	2268-3102	88	86.44	100	0.931	1.752	1.451	3.729	1.717
1_June_29_2012_33464640	1012-1865	4_February_25_2014_31163140	2458-3263	82	83.4	83.74	0.902	1.682	1.618	3.755	1.591
1_June_29_2012_33464640	1012-1865	4_February_25_2014_32555062	1602-2420	85	83.09	84.04	0.841	1.598	1.695	3.704	1.512
1_June_29_2012_33464640	1012-1865	4_February_25_2014_32637312	731-1546	81	82.02	84.04	0.86	1.674	1.656	3.812	1.532
1_June_29_2012_33464640	1012-1865	4_February_25_2014_34187781	1171-1973	80	84.26	100	0.911	1.717	1.467	3.577	1.669
1_June_29_2012_33464640	1012-1865	4_February_25_2014_35801078	217-1025	87	86.86	100	0.891	1.724	1.495	3.6	1.583
1_June_29_2012_33464640	1012-1865	4_February_25_2014_35806187	1737-2573	79	80.35	100	0.794	1.717	1.716	3.655	1.521
1_June_29_2012_33464640	1012-1865	4_February_25_2014_35889625	3926-4745	81	81.99	83.12	0.873	1.74	1.617	3.995	1.599
1_June_29_2012_33464640	1012-1865	4_February_25_2014_35961265	3857-4676	87	79.73	100	0.866	1.82	1.825	3.448	1.641
1_June_29_2012_33464640	1012-1865	4_February_25_2014_36015109	3698-4513	78	81.27	84.35	0.962	1.768	2.164	3.649	1.589
1_June_29_2012_33464640	1012-1865	4_February_25_2014_36020187	277-1054	80	81.9	84.35	0.909	1.661	1.704	3.591	1.576
1_June_29_2012_33464640	1012-1865	4_February_25_2014_36320234	565-1383	84	82.24	100	0.845	1.803	1.623	3.763	1.579
1_June_29_2012_33464640	1012-1865	4_February_25_2014_36819593	509-1319	85	85.14	100	0.938	1.802	1.676	3.927	1.646
1_June_29_2012_33464640	1012-1865	4_February_25_2014_36854203	1095-1927	81	79.6	100	0.982	1.758	1.657	3.706	1.556
1_June_29_2012_33464640	1012-1865	4_February_25_2014_38315750	1078-1879	82	83.46	100	0.958	1.708	1.58	3.606	1.583
1_June_29_2012_33464640	1012-1865	4_February_25_2014_38735406	3491-4297	81	81.7	100	0.897	1.694	1.619	3.786	1.539
1_June_29_2012_33464640	1012-1865	4_February_25_2014_38772359	2028-2853	79	81.42	84.96	0.888	1.651	1.931	3.755	1.576
1_June_29_2012_33464640	1012-1865	4_February_25_2014_38919687	2767-3582	87	85.29	100	0.851	1.806	1.716	3.805	1.641
1_June_29_2012_33464640	1012-1865	4_February_25_2014_38924765	2584-3432	77	83.22	83.74	0.823	1.691	1.73	3.751	1.544
1_June_29_2012_33464640	1012-1865	4_February_25_2014_39042281	2197-3022	70	81.11	84.35	0.867	1.745	2.033	3.612	1.602
1_June_29_2012_33464640	1012-1865	4_February_25_2014_39085781	2268-3102	88	82.92	100	0.925	1.763	1.45	3.646	1.707
1_June_29_2012_34453812	3675-4522	4_February_25_2014_31163140	2458-3263	82	83.48	83.61	0.97	1.688	1.59	3.826	1.667
1_June_29_2012_34453812	3675-4522	4_February_25_2014_32555062	1602-2420	81	81.2	35.08	0.908	1.6	1.677	3.736	1.586
1_June_29_2012_34453812	3675-4522	4_February_25_2014_32637312	731-1546	79	81.71	83.92	0.927	1.682	1.634	3.859	1.606
1_June_29_2012_34453812	3675-4522	4_February_25_2014_34187781	1171-1973	81	83.93	100	0.974	1.733	1.447	3.637	1.747
1_June_29_2012_34453812	3675-4522	4_February_25_2014_35801078	217-1025	86	85.39	100	0.958	1.734	1.508	3.67	1.656
1_June_29_2012_34453812	3675-4522	4_February_25_2014_35806187	1737-2573	84	79.27	31.68	0.863	1.72	1.693	3.7	1.594
1_June_29_2012_34453812	3675-4522	4_February_25_2014_35889625	3926-4745	85	81.22	100	0.941	1.737	1.583	4.059	1.675
1_June_29_2012_34453812	3675-4522	4_February_25_2014_35961265	3857-4676	86	80.92	100	0.937	1.834	1.776	3.52	1.714
1_June_29_2012_34453812	3675-4522	4_February_25_2014_36015109	3698-4513	82	81.2	84.23	1.03	1.77	2.117	3.7	1.661
1_June_29_2012_34453812	3675-4522	4_February_25_2014_36020187	277-1054	81	80.07	84.23	0.975	1.667	1.691	3.631	1.651
1_June_29_2012_34453812	3675-4522	4_February_25_2014_36320234	565-1383	83	82.65	81.45	0.9	1.81	1.615	3.818	1.648
1_June_29_2012_34453812	3675-4522	4_February_25_2014_36819593	509-1319	86	84	100	1.005	1.818	1.659	4.012	1.718
1_June_29_2012_34453812	3675-4522	4_February_25_2014_36854203	1095-1927	82	80.19	100	1.053	1.758	1.626	3.744	1.628
1_June_29_2012_34453812	3675-4522	4_February_25_2014_38315750	1078-1879	86	81.45	100	1.024	1.723	1.567	3.677	1.654
1_June_29_2012_34453812	3675-4522	4_February_25_2014_38735406	3491-4297	81	80.21	82.68	0.958	1.7	1.605	3.824	1.611
1_June_29_2012_34453812	3675-4522	4_February_25_2014_38772359	2028-2853	76	81.64	84.85	0.953	1.665	1.892	3.789	1.67
1_June_29_2012_34453812	3675-4522	4_February_25_2014_38919687	2767-3582	89	86.23	100	0.917	1.814	1.703	3.881	1.706
1_June_29_2012_34453812	3675-4522	4_February_25_2014_38924765	2584-3432	76	84.22	83.61	0.888	1.698	1.71	3.812	1.613
1_June_29_2012_34453812	3675-4522	4_February_25_2014_39042281	2197-3022	83	83.35	84.23	0.934	1.753	1.986	3.652	1.675
1_June_29_2012_34453812	3675-4522	4_February_25_2014_39085781	2268-3102	88	83.53	100	0.988	1.776	1.446	3.733	1.776
1_June_29_2012_39787500	2774-3600	4_February_25_2014_31163140	2458-3263	88	84.8	100	0.9	1.624	1.683	3.584	1.617
1_June_29_2012_39787500	2774-3600	4_February_25_2014_32555062	1602-2420	80	85.56	100	0.842	1.544	1.78	3.484	1.55
1_June_29_2012_39787500	2774-3600	4_February_25_2014_32637312	731-1546	81	85.33	100	0.862	1.615	1.727	3.617	1.565
1_June_29_2012_39787500	2774-3600	4_February_25_2014_34187781	1171-1973	80	86.74	100	0.919	1.656	1.538	3.411	1.698
1_June_29_2012_39787500	2774-3600	4_February_25_2014_35801078	217-1025	89	85.66	100	0.884	1.666	1.622	3.441	1.619
1_June_29_2012_39787500	2774-3600	4_February_25_2014_35806187	1737-2573	79	83.12	100	0.796	1.663	1.787	3.45	1.56
1_June_29_2012_39787500	2774-3600	4_February_25_2014_35889625	3926-4745	89	84.41	100	0.874	1.687	1.676	3.81	1.638
1_June_29_2012_39787500	2774-3600	4_February_25_2014_35961265	3857-4676	85	84.3	100	0.876	1.762	1.851	3.288	1.677
1_June_29_2012_39787500	2774-3600	4_February_25_2014_36015109	3698-4513	87	83.81	84.28	0.962	1.71	2.198	3.45	1.612
1_June_29_2012_39787500	2774-3600	4_February_25_2014_36020187	277-1054	88	82.91	100	0.913	1.606	1.789	3.376	1.612
1_June_29_2012_39787500	2774-3600	4_February_25_2014_36320234	565-1383	90	83.55	100	0.847	1.748	1.716	3.573	1.611
1_June_29_2012_39787500	2774-3600	4_February_25_2014_36819593	509-1319	85	87.16	100	0.942	1.739	1.757	3.786	1.68
1_June_29_2012_39787500	2774-3600	4_February_25_2014_36854203	1095-1927	81	83.17	100	0.983	1.69	1.715	3.481	1.584
1_June_29_2012_39787500	2774-3600	4_February_25_2014_38315750	1078-1879	84	84.83	100	0.964	1.648	1.661	3.431	1.616
1_June_29_2012_39787500	2774-3600	4_February_25_2014_38735406	3491-4297	89	80.62	100	0.904	1.634	1.702	3.579	1.568
1_June_29_2012_39787500	2774-3600	4_February_25_2014_38772359	2028-2853	82	84.25	100	0.89	1.603	1.976	3.536	1.635
1_June_29_2012_39787500	2774-3600	4_February_25_2014_38919687	2767-3582	90	84.32	100	0.85	1.749	1.798	3.659	1.673
1_June_29_2012_39787500	2774-3600	4_February_25_2014_38924765	2584-3432	80	85.6	100	0.825	1.637	1.8	3.588	1.567
1_June_29_2012_39787500	2774-3600	4_February_25_2014_39042281	2197-3022	80	82.01	100	0.87	1.687	2.065	3.399	1.634
1_June_29_2012_39787500	2774-3600	4_February_25_2014_39085781	2268-3102	85	83.74	100	0.93	1.705	1.556	3.504	1.741
1_June_29_2012_39889718	1708-2553	4_February_25_2014_31163140	2458-3263	85	81.44	100	0.961	1.663	1.715	3.99	1.674
1_June_29_2012_39889718	1708-2553	4_February_25_2014_32555062	1602-2420	81	78.61	84.04	0.901	1.605	1.775	3.997	1.598
1_June_29_2012_39889718	1708-2553	4_February_25_2014_32637312	731-1546	82	79.63	84.04	0.917	1.662	1.744	4.094	1.619
1_June_29_2012_39889718	1708-2553	4_February_25_2014_34187781	1171-1973	88	81.89	100	0.961	1.671	1.557	3.81	1.756
1_June_29_2012_39889718	1708-2553	4_February_25_2014_35801078	217-1025	88	85.71	100	0.955	1.705	1.556	3.81	1.663
1_June_29_2012_39889718	1708-2553	4_February_25_2014_35806187	1737-2573	85	76.57	100	0.855	1.718	1.807	3.937	1.607
1_June_29_2012_39889718	1708-2553	4_February_25_2014_35889625	3926-4745	88	81.09	100	0.934	1.748	1.714	4.24	1.684
1_June_29_2012_39889718	1708-2553	4_February_25_2014_35961265	3857-4676	88	79.23	100	0.912	1.786	1.938	3.657	1.735
1_June_29_2012_39889718	1708-2553	4_February_25_2014_36015109	3698-4513	80	78.44	84.35	1.022	1.778	2.276	3.926	1.674
1_June_29_2012_39889718	1708-2553	4_February_25_2014_36020187	277-1054	81	78.87	84.35	0.963	1.659	1.786	3.889	1.662
1_June_29_2012_39889718	1708-2553	4_February_25_2014_36320234	565-1383	88	82.05	100	0.9	1.784	1.707	4.022	1.662
1_June_29_2012_39889718	1708-2553	4_February_25_2014_36819593	509-1319	89	85.11	100	0.992	1.769	1.759	4.11	1.735
1_June_29_2012_39889718	1708-2553	4_February_25_2014_36854203	1095-1927	86	76.94	100	1.039	1.759	1.755	4.025	1.639
1_June_29_2012_39889718	1708-2553	4_February_25_2014_38315750	1078-1879	88	81.68	100	1.01	1.69	1.666	3.842	1.666
1_June_29_2012_39889718	1708-2553	4_February_25_2014_38735406	3491-4297	82	78.47	100	0.941	1.683	1.709	4.069	1.608
1_June_29_2012_39889718	1708-2553	4_February_25_2014_38772359	2028-2853	85	76.7	100	0.943	1.65	2.034	4.049	1.676
1_June_29_2012_39889718	1708-2553	4_February_25_2014_38919687	2767-3582	90	84.57	100	0.911	1.798	1.803	3.99	1.726
1_June_29_2012_39889718	1708-2553	4_February_25_2014_38924765	2584-3432	81	82.39	83.74	0.88	1.68	1.822	3.991	1.624
1_June_29_2012_39889718	1708-2553	4_February_25_2014_39042281	2197-3022	90	77.39	84.35	0.923	1.723	2.146	3.909	1.68
1_June_29_2012_39889718	1708-2553	4_February_25_2014_39085781	2268-3102	88	86.69	100	0.975	1.729	1.512	3.856	1.789
1_June_29_2012_40247484	3313-4138	4_February_25_2014_31163140	2458-3263	83	84.9	83.56	1.047	1.737	1.687	3.671	1.685
1_June_29_2012_40247484	3313-4138	4_February_25_2014_32555062	1602-2420	81	81.7	83.87	0.986	1.679	1.774	3.626	1.602
1_June_29_2012_40247484	3313-4138	4_February_25_2014_32637312	731-1546	82	82.16	83.87	0.999	1.735	1.726	3.754	1.621
1_June_29_2012_40247484	3313-4138	4_February_25_2014_34187781	1171-1973	90	81.66	100	1.037	1.744	1.542	3.483	1.763
1_June_29_2012_40247484	3313-4138	4_February_25_2014_35801078	217-1025	83	85.36	83.25	1.039	1.778	1.593	3.5	1.672
1_June_29_2012_40247484	3313-4138	4_February_25_2014_35806187	1737-2573	86	78.4	100	0.946	1.793	1.793	3.579	1.625
1_June_29_2012_40247484	3313-4138	4_February_25_2014_35889625	3926-4745	83	82.49	82.94	1.019	1.821	1.684	3.907	1.699
1_June_29_2012_40247484	3313-4138	4_February_25_2014_35961265	3857-4676	89	81.44	100	1.004	1.856	1.879	3.353	1.735
1_June_29_2012_40247484	3313-4138	4_February_25_2014_36015109	3698-4513	81	81.62	84.18	1.107	1.852	2.222	3.574	1.669
1_June_29_2012_40247484	3313-4138	4_February_25_2014_36020187	277-1054	91	81.46	84.18	1.042	1.735	1.787	3.521	1.669
1_June_29_2012_40247484	3313-4138	4_February_25_2014_36320234	565-1383	84	82.99	100	0.976	1.849	1.706	3.68	1.669
1_June_29_2012_40247484	3313-4138	4_February_25_2014_36819593	509-1319	84	85.01	100	1.071	1.841	1.756	3.82	1.719
1_June_29_2012_40247484	3313-4138	4_February_25_2014_36854203	1095-1927	81	80.81	85.42	1.12	1.835	1.721	3.639	1.649
1_June_29_2012_40247484	3313-4138	4_February_25_2014_38315750	1078-1879	82	84.37	100	1.087	1.763	1.66	3.525	1.668
1_June_29_2012_40247484	3313-4138	4_February_25_2014_38735406	3491-4297	82	80.59	82.63	1.022	1.759	1.699	3.709	1.619
1_June_29_2012_40247484	3313-4138	4_February_25_2014_38772359	2028-2853	92	80.98	84.8	1.022	1.715	1.985	3.668	1.684
1_June_29_2012_40247484	3313-4138	4_February_25_2014_38919687	2767-3582	86	86.06	100	0.998	1.867	1.792	3.714	1.73
1_June_29_2012_40247484	3313-4138	4_February_25_2014_38924765	2584-3432	82	83.23	83.56	0.968	1.754	1.803	3.666	1.627
1_June_29_2012_40247484	3313-4138	4_February_25_2014_39042281	2197-3022	80	80.13	84.18	1.005	1.806	2.087	3.547	1.696
1_June_29_2012_40247484	3313-4138	4_February_25_2014_39085781	2268-3102	89	86.94	100	1.058	1.797	1.535	3.551	1.805
1_June_29_2012_42635281	2621-3460	4_February_25_2014_31163140	2458-3263	90	84.32	100	0.922	1.495	1.538	3.631	1.53
1_June_29_2012_42635281	2621-3460	4_February_25_2014_32555062	1602-2420	89	83.46	100	0.864	1.41	1.663	3.428	1.457
1_June_29_2012_42635281	2621-3460	4_February_25_2014_32637312	731-1546	89	83.18	100	0.877	1.484	1.589	3.608	1.477
1_June_29_2012_42635281	2621-3460	4_February_25_2014_34187781	1171-1973	90	83.54	100	0.916	1.53	1.404	3.444	1.613
1_June_29_2012_42635281	2621-3460	4_February_25_2014_35801078	217-1025	90	83.29	100	0.914	1.533	1.534	3.546	1.53
1_June_29_2012_42635281	2621-3460	4_February_25_2014_35806187	1737-2573	88	81.93	100	0.82	1.529	1.646	3.407	1.47
1_June_29_2012_42635281	2621-3460	4_February_25_2014_35889625	3926-4745	90	83.21	100	0.897	1.552	1.523	3.823	1.553
1_June_29_2012_42635281	2621-3460	4_February_25_2014_35961265	3857-4676	89	80.83	92.3	0.879	1.635	1.675	3.348	1.592
1_June_29_2012_42635281	2621-3460	4_February_25_2014_36015109	3698-4513	95	80.77	100	0.984	1.578	2.022	3.413	1.528
1_June_29_2012_42635281	2621-3460	4_February_25_2014_36020187	277-1054	90	84.86	100	0.92	1.471	1.663	3.317	1.524
1_June_29_2012_42635281	2621-3460	4_February_25_2014_36320234	565-1383	90	83.12	100	0.858	1.621	1.598	3.583	1.515
1_June_29_2012_42635281	2621-3460	4_February_25_2014_36819593	509-1319	83	80	100	0.95	1.614	1.629	3.91	1.593
1_June_29_2012_42635281	2621-3460	4_February_25_2014_36854203	1095-1927	90	82.84	89.4	0.996	1.556	1.567	3.389	1.49
1_June_29_2012_42635281	2621-3460	4_February_25_2014_38315750	1078-1879	92	83.59	100	0.964	1.52	1.539	3.487	1.525
1_June_29_2012_42635281	2621-3460	4_February_25_2014_38735406	3491-4297	90	82.77	100	0.9	1.5	1.574	3.533	1.475
1_June_29_2012_42635281	2621-3460	4_February_25_2014_38772359	2028-2853	85	84	100	0.9	1.472	1.82	3.47	1.548
1_June_29_2012_42635281	2621-3460	4_February_25_2014_38919687	2767-3582	90	82.26	100	0.873	1.62	1.674	3.751	1.584
1_June_29_2012_42635281	2621-3460	4_February_25_2014_38924765	2584-3432	88	84.4	100	0.844	1.502	1.665	3.601	1.487
1_June_29_2012_42635281	2621-3460	4_February_25_2014_39042281	2197-3022	83	82.63	100	0.883	1.56	1.888	3.339	1.549
1_June_29_2012_42635281	2621-3460	4_February_25_2014_39085781	2268-3102	90	79.25	100	0.935	1.579	1.449	3.616	1.656
				83.805

## Sheet: yellow 16 vs black 33
black 33	black 33-duration	yellow 16	yellow 16-duration	% similarity	accuarcy	% sequential	Pitch diff	FM diff	Entropy diff	Goodness diff	AM diff
1_January_24_2015_28862750	464-1436	1_December_10_2014_29923015	1863-2891	89	84.41	100	1.825	1.996	1.356	3.824	2.477
1_January_24_2015_28862750	464-1436	1_December_10_2014_29929546	2-1015	83	79.51	69.29	1.964	2.109	1.502	3.895	2.58
1_January_24_2015_28862750	464-1436	1_December_10_2014_30169328	274-1286	91	81.26	100	1.664	1.919	1.475	3.399	2.456
1_January_24_2015_28862750	464-1436	1_December_10_2014_30282109	208-1199	90	82.96	100	1.981	1.955	1.287	3.823	2.472
1_January_24_2015_28862750	464-1436	1_December_10_2014_30390656	255-1287	93	82.73	100	1.817	1.924	1.359	3.494	2.371
1_January_24_2015_28862750	464-1436	1_December_10_2014_32200406	797-1857	86	82.4	100	1.878	1.94	1.351	3.501	2.473
1_January_24_2015_28862750	464-1436	1_December_10_2014_32205515	1200-2280	85	84.64	62.2	1.663	1.89	1.477	3.439	2.383
1_January_24_2015_28862750	464-1436	1_December_10_2014_32352765	3157-4245	86	77.9	100	1.951	2.02	1.516	3.971	2.582
1_January_24_2015_28862750	464-1436	1_December_10_2014_32362937	186-1140	89	82.04	90.94	1.676	1.939	1.388	3.524	2.38
1_January_24_2015_28862750	464-1436	1_December_10_2014_33231625	641-1671	88	81.58	100	1.747	1.844	1.492	3.535	2.416
1_January_24_2015_28862750	464-1436	1_December_10_2014_33242062	1661-2699	90	81.82	100	1.771	1.913	1.239	3.585	2.41
1_January_24_2015_28862750	464-1436	1_December_10_2014_33265937	1583-2619	85	80.66	68.5	1.901	1.975	1.55	3.461	2.293
1_January_24_2015_28862750	464-1436	1_December_10_2014_33323687	1657-2657	82	81.17	100	1.878	2.003	1.495	3.788	2.574
1_January_24_2015_28862750	464-1436	1_December_10_2014_33417046	993-2002	85	81.85	100	1.719	1.917	1.474	3.59	2.465
1_January_24_2015_28862750	464-1436	1_December_10_2014_33422125	116-1138	87	81.25	100	1.489	1.884	1.371	3.292	2.208
1_January_24_2015_28862750	464-1436	1_December_10_2014_33805000	1288-2205	86	82.71	100	1.736	1.91	1.328	3.846	2.348
1_January_24_2015_28862750	464-1436	1_December_10_2014_33810093	416-1434	86	84.24	100	1.725	1.928	1.322	3.561	2.425
1_January_24_2015_28862750	464-1436	1_December_10_2014_38365578	1251-2449	84	77.87	67.91	1.838	2	1.348	3.409	2.54
1_January_24_2015_28862750	464-1436	1_December_10_2014_38444296	3009-4005	87	83.65	91.53	1.609	1.805	1.32	3.301	2.401
1_January_24_2015_28862750	464-1436	1_December_10_2014_38496671	2070-3063	86	82.83	91.33	1.654	1.89	1.267	3.445	2.413
1_January_24_2015_29393296	882-1869	1_December_10_2014_29923015	1863-2891	85	78.28	66.53	1.853	1.9	1.363	3.509	2.297
1_January_24_2015_29393296	882-1869	1_December_10_2014_29929546	2-1015	89	82.27	92.12	1.663	1.831	1.352	3.569	2.431
1_January_24_2015_29393296	882-1869	1_December_10_2014_30169328	274-1286	88	83.58	100	1.683	1.838	1.349	3.265	2.466
1_January_24_2015_29393296	882-1869	1_December_10_2014_30282109	208-1199	83	82.74	100	1.774	1.69	1.285	3.512	2.435
1_January_24_2015_29393296	882-1869	1_December_10_2014_30390656	255-1287	85	81.98	100	1.827	1.849	1.496	3.912	2.398
1_January_24_2015_29393296	882-1869	1_December_10_2014_32200406	797-1857	90	75.47	69.03	1.955	1.965	1.66	3.987	2.496
1_January_24_2015_29393296	882-1869	1_December_10_2014_32205515	1200-2280	91	82.57	100	1.663	1.765	1.595	3.414	2.373
1_January_24_2015_29393296	882-1869	1_December_10_2014_32352765	3157-4245	85	82.34	100	1.969	1.799	1.425	3.905	2.388
1_January_24_2015_29393296	882-1869	1_December_10_2014_32362937	186-1140	89	79.58	100	1.812	1.778	1.534	3.568	2.288
1_January_24_2015_29393296	882-1869	1_December_10_2014_33231625	641-1671	90	83.1	68.45	1.872	1.794	1.484	3.554	2.391
1_January_24_2015_29393296	882-1869	1_December_10_2014_33242062	1661-2699	90	82.43	92.59	1.665	1.737	1.617	3.409	2.305
1_January_24_2015_29393296	882-1869	1_December_10_2014_33265937	1583-2619	85	75.29	68.45	1.948	1.872	1.663	4.081	2.5
1_January_24_2015_29393296	882-1869	1_December_10_2014_33323687	1657-2657	82	83.01	100	1.681	1.787	1.508	3.54	2.294
1_January_24_2015_29393296	882-1869	1_December_10_2014_33417046	993-2002	88	82.78	100	1.744	1.69	1.593	3.527	2.332
1_January_24_2015_29393296	882-1869	1_December_10_2014_33422125	116-1138	80	80.24	100	1.773	1.762	1.377	3.624	2.33
1_January_24_2015_29393296	882-1869	1_December_10_2014_33805000	1288-2205	85	76.39	69.23	1.902	1.827	1.724	3.524	2.21
1_January_24_2015_29393296	882-1869	1_December_10_2014_33810093	416-1434	85	77.42	100	1.872	1.859	1.64	3.894	2.491
1_January_24_2015_29393296	882-1869	1_December_10_2014_38365578	1251-2449	88	81.4	100	1.715	1.763	1.572	3.595	2.382
1_January_24_2015_29393296	882-1869	1_December_10_2014_38444296	3009-4005	88	80.67	100	1.503	1.727	1.549	3.294	2.126
1_January_24_2015_29393296	882-1869	1_December_10_2014_38496671	2070-3063	86	80.81	100	1.735	1.759	1.468	3.881	2.267
1_January_24_2015_30361203	1463-2468	1_December_10_2014_29923015	1863-2891	86	83.19	91.82	1.615	1.652	1.456	3.285	2.319
1_January_24_2015_30361203	1463-2468	1_December_10_2014_29929546	2-1015	83	82.54	100	1.656	1.738	1.423	3.451	2.332
1_January_24_2015_30361203	1463-2468	1_December_10_2014_30169328	274-1286	83	80.31	100	1.676	1.803	1.456	3.3	2.411
1_January_24_2015_30361203	1463-2468	1_December_10_2014_30282109	208-1199	90	82.03	100	1.77	1.544	1.42	3.534	2.355
1_January_24_2015_30361203	1463-2468	1_December_10_2014_30390656	255-1287	84	81.81	55.39	1.857	1.75	1.534	3.561	2.216
1_January_24_2015_30361203	1463-2468	1_December_10_2014_32200406	797-1857	91	82.66	92.59	1.668	1.675	1.508	3.565	2.343
1_January_24_2015_30361203	1463-2468	1_December_10_2014_32205515	1200-2280	85	83.31	100	1.691	1.69	1.474	3.292	2.386
1_January_24_2015_30361203	1463-2468	1_December_10_2014_32352765	3157-4245	90	85.01	100	1.724	1.783	1.441	3.589	2.345
1_January_24_2015_30361203	1463-2468	1_December_10_2014_32362937	186-1140	89	80.51	100	1.737	1.918	1.524	3.629	2.202
1_January_24_2015_30361203	1463-2468	1_December_10_2014_33231625	641-1671	87	74.3	59.8	1.888	2.052	1.616	3.693	2.299
1_January_24_2015_30361203	1463-2468	1_December_10_2014_33242062	1661-2699	89	78.92	84.7	1.677	1.827	1.555	3.004	2.176
1_January_24_2015_30361203	1463-2468	1_December_10_2014_33265937	1583-2619	86	80.32	92.74	1.903	1.872	1.445	3.627	2.196
1_January_24_2015_30361203	1463-2468	1_December_10_2014_33323687	1657-2657	88	80.8	59.8	1.736	1.863	1.453	3.296	2.098
1_January_24_2015_30361203	1463-2468	1_December_10_2014_33417046	993-2002	86	78.32	60.58	1.74	1.872	1.618	3.349	2.151
1_January_24_2015_30361203	1463-2468	1_December_10_2014_33422125	116-1138	85	78.47	100	1.657	1.856	1.761	3.352	2.146
1_January_24_2015_30361203	1463-2468	1_December_10_2014_33805000	1288-2205	87	74.52	59.01	1.959	1.93	1.43	3.416	2.252
1_January_24_2015_30361203	1463-2468	1_December_10_2014_33810093	416-1434	86	79.27	67.45	1.573	1.849	1.593	3.329	2.097
1_January_24_2015_30361203	1463-2468	1_December_10_2014_38365578	1251-2449	89	78.29	100	1.66	1.753	1.746	3.346	2.136
1_January_24_2015_30361203	1463-2468	1_December_10_2014_38444296	3009-4005	87	81.14	91.96	1.677	1.826	1.407	3.391	2.134
1_January_24_2015_30361203	1463-2468	1_December_10_2014_38496671	2070-3063	82	78.12	60.19	1.811	1.902	1.639	3.269	2.017
1_January_24_2015_30432968	2557-3550	1_December_10_2014_29923015	1863-2891	90	79.88	100	1.546	1.756	1.354	3.04	2.034
1_January_24_2015_30432968	2557-3550	1_December_10_2014_29929546	2-1015	88	82.14	100	1.772	1.78	1.549	3.349	2.191
1_January_24_2015_30432968	2557-3550	1_December_10_2014_30169328	274-1286	91	81.73	67.64	1.658	1.837	1.585	3.442	2.161
1_January_24_2015_30432968	2557-3550	1_December_10_2014_30282109	208-1199	91	76.6	59.6	1.762	1.925	1.499	3.214	2.261
1_January_24_2015_30432968	2557-3550	1_December_10_2014_30390656	255-1287	83	80.9	100	1.492	1.767	1.57	2.923	1.881
1_January_24_2015_30432968	2557-3550	1_December_10_2014_32200406	797-1857	73	81.67	100	1.602	1.804	1.379	3.271	2.123
1_January_24_2015_30432968	2557-3550	1_December_10_2014_32205515	1200-2280	90	81.62	100	1.579	1.862	1.525	3.117	2.213
1_January_24_2015_30432968	2557-3550	1_December_10_2014_32352765	3157-4245	89	80.39	100	1.691	1.619	1.455	3.319	2.158
1_January_24_2015_30432968	2557-3550	1_December_10_2014_32362937	186-1140	86	81.08	59.01	1.783	1.974	1.469	3.493	2.049
1_January_24_2015_30432968	2557-3550	1_December_10_2014_33231625	641-1671	87	81.3	100	1.558	1.722	1.479	3.398	2.151
1_January_24_2015_30432968	2557-3550	1_December_10_2014_33242062	1661-2699	88	80.85	68.43	1.686	1.7	1.398	3.237	2.143
1_January_24_2015_30432968	2557-3550	1_December_10_2014_33265937	1583-2619	87	76	91.96	1.796	1.941	1.647	3.591	2.298
1_January_24_2015_30432968	2557-3550	1_December_10_2014_33323687	1657-2657	89	84.01	100	1.774	1.883	1.582	3.829	2.399
1_January_24_2015_30432968	2557-3550	1_December_10_2014_33417046	993-2002	85	76.1	70.36	1.911	1.995	1.752	3.892	2.494
1_January_24_2015_30432968	2557-3550	1_December_10_2014_33422125	116-1138	89	86.81	100	1.702	1.793	1.554	3.197	2.373
1_January_24_2015_30432968	2557-3550	1_December_10_2014_33805000	1288-2205	86	83.15	63.1	1.932	1.838	1.514	3.821	2.391
1_January_24_2015_30432968	2557-3550	1_December_10_2014_33810093	416-1434	85	82.08	70.36	1.764	1.811	1.619	3.493	2.29
1_January_24_2015_30432968	2557-3550	1_December_10_2014_38365578	1251-2449	88	77.88	55.83	1.765	1.825	1.756	3.541	2.34
1_January_24_2015_30432968	2557-3550	1_December_10_2014_38444296	3009-4005	87	83.93	70.36	1.696	1.824	1.768	3.547	2.343
1_January_24_2015_30432968	2557-3550	1_December_10_2014_38496671	2070-3063	85	79.68	100	1.978	1.883	1.538	3.611	2.445
1_January_24_2015_30481859	3876-4878	1_December_10_2014_29923015	1863-2891	86	82.53	63.1	1.712	1.793	1.465	3.587	2.325
1_January_24_2015_30481859	3876-4878	1_December_10_2014_29929546	2-1015	90	77.7	45.24	1.849	1.861	1.814	3.467	2.214
1_January_24_2015_30481859	3876-4878	1_December_10_2014_30169328	274-1286	90	78.34	100	1.821	1.887	1.726	3.792	2.488
1_January_24_2015_30481859	3876-4878	1_December_10_2014_30282109	208-1199	91	83.35	100	1.665	1.797	1.65	3.593	2.386
1_January_24_2015_30481859	3876-4878	1_December_10_2014_30390656	255-1287	85	81.11	70.75	1.588	1.735	1.495	3.233	2.226
1_January_24_2015_30481859	3876-4878	1_December_10_2014_32200406	797-1857	89	85.5	100	1.791	1.733	1.557	3.541	2.386
1_January_24_2015_30481859	3876-4878	1_December_10_2014_32205515	1200-2280	87	86.59	100	1.688	1.804	1.572	3.635	2.355
1_January_24_2015_30481859	3876-4878	1_December_10_2014_32352765	3157-4245	88	81.45	63.1	1.785	1.882	1.582	3.41	2.456
1_January_24_2015_30481859	3876-4878	1_December_10_2014_32362937	186-1140	92	84.23	70.36	1.541	1.751	1.669	3.123	2.08
1_January_24_2015_30481859	3876-4878	1_December_10_2014_33231625	641-1671	87	83.53	100	1.639	1.772	1.495	3.468	2.323
1_January_24_2015_30481859	3876-4878	1_December_10_2014_33242062	1661-2699	86	80.94	100	1.619	1.835	1.538	3.297	2.406
1_January_24_2015_30481859	3876-4878	1_December_10_2014_33265937	1583-2619	85	83.26	100	1.72	1.574	1.508	3.515	2.353
1_January_24_2015_30481859	3876-4878	1_December_10_2014_33323687	1657-2657	87	81.84	100	1.82	1.95	1.526	3.685	2.242
1_January_24_2015_30481859	3876-4878	1_December_10_2014_33417046	993-2002	85	83.7	100	1.602	1.704	1.592	3.575	2.35
1_January_24_2015_30481859	3876-4878	1_December_10_2014_33422125	116-1138	86	82.97	100	1.718	1.667	1.441	3.432	2.338
1_January_24_2015_30481859	3876-4878	1_December_10_2014_33805000	1288-2205	87	84.79	70.36	1.616	1.817	1.59	3.523	2.294
1_January_24_2015_30481859	3876-4878	1_December_10_2014_33810093	416-1434	86	85.15	100	1.917	1.999	1.422	3.652	2.485
1_January_24_2015_30481859	3876-4878	1_December_10_2014_38365578	1251-2449	92	79.79	69.01	2.044	2.087	1.6	3.712	2.578
1_January_24_2015_30481859	3876-4878	1_December_10_2014_38444296	3009-4005	87	82.7	100	1.75	1.921	1.522	3.24	2.458
1_January_24_2015_30481859	3876-4878	1_December_10_2014_38496671	2070-3063	88	84.24	60.58	2.06	1.945	1.358	3.645	2.47
1_January_24_2015_30628093	290-1281	1_December_10_2014_29923015	1863-2891	86	82.15	100	1.75	1.892	1.545	3.285	2.384
1_January_24_2015_30628093	290-1281	1_December_10_2014_29929546	2-1015	93	79.86	59.8	2.032	2.01	1.597	3.785	2.58
1_January_24_2015_30628093	290-1281	1_December_10_2014_30169328	274-1286	85	83.17	100	1.768	1.936	1.433	3.364	2.378
1_January_24_2015_30628093	290-1281	1_December_10_2014_30282109	208-1199	86	80.78	100	1.832	1.844	1.516	3.387	2.413
1_January_24_2015_30628093	290-1281	1_December_10_2014_30390656	255-1287	86	84.33	91.56	1.859	1.912	1.308	3.417	2.41
1_January_24_2015_30628093	290-1281	1_December_10_2014_32200406	797-1857	92	78.93	45.68	1.993	1.968	1.662	3.293	2.297
1_January_24_2015_30628093	290-1281	1_December_10_2014_32205515	1200-2280	86	81.83	100	1.959	1.986	1.574	3.602	2.575
1_January_24_2015_30628093	290-1281	1_December_10_2014_32352765	3157-4245	86	80.86	68.62	1.802	1.921	1.491	3.438	2.468
1_January_24_2015_30628093	290-1281	1_December_10_2014_32362937	186-1140	90	81.03	100	1.592	1.895	1.49	3.141	2.205
1_January_24_2015_30628093	290-1281	1_December_10_2014_33231625	641-1671	88	83.41	100	1.82	1.906	1.397	3.683	2.347
1_January_24_2015_30628093	290-1281	1_December_10_2014_33242062	1661-2699	90	84.83	100	1.811	1.924	1.368	3.398	2.431
1_January_24_2015_30628093	290-1281	1_December_10_2014_33265937	1583-2619	90	81.96	91.56	1.917	1.988	1.427	3.236	2.539
1_January_24_2015_30628093	290-1281	1_December_10_2014_33323687	1657-2657	88	82.87	100	1.704	1.808	1.386	3.162	2.397
1_January_24_2015_30628093	290-1281	1_December_10_2014_33417046	993-2002	83	81.89	100	1.745	1.891	1.358	3.287	2.416
1_January_24_2015_30628093	290-1281	1_December_10_2014_33422125	116-1138	88	79.26	100	1.764	1.96	1.385	3.15	2.491
1_January_24_2015_30628093	290-1281	1_December_10_2014_33805000	1288-2205	88	79.03	100	1.858	1.679	1.35	3.352	2.439
1_January_24_2015_30628093	290-1281	1_December_10_2014_33810093	416-1434	88	81.27	45.88	1.944	1.9	1.472	3.342	2.297
1_January_24_2015_30628093	290-1281	1_December_10_2014_38365578	1251-2449	83	81.65	100	1.755	1.841	1.442	3.419	2.426
1_January_24_2015_30628093	290-1281	1_December_10_2014_38444296	3009-4005	89	83.32	100	1.775	1.837	1.398	3.108	2.466
1_January_24_2015_30628093	290-1281	1_December_10_2014_38496671	2070-3063	92	82.35	68.23	1.899	1.903	1.472	3.301	2.368
1_January_24_2015_31125343	1644-2639	1_December_10_2014_29923015	1863-2891	92	82.3	100	1.589	1.938	1.647	3.41	2.312
1_January_24_2015_31125343	1644-2639	1_December_10_2014_29929546	2-1015	85	84.92	91.83	1.934	1.998	1.464	3.829	2.329
1_January_24_2015_31125343	1644-2639	1_December_10_2014_30169328	274-1286	88	83.95	91.83	1.753	1.998	1.548	3.498	2.228
1_January_24_2015_31125343	1644-2639	1_December_10_2014_30282109	208-1199	91	83.46	100	1.82	2	1.525	3.511	2.329
1_January_24_2015_31125343	1644-2639	1_December_10_2014_30390656	255-1287	86	82.87	100	1.587	1.9	1.651	3.444	2.241
1_January_24_2015_31125343	1644-2639	1_December_10_2014_32200406	797-1857	91	79.97	91.83	1.884	2.069	1.694	3.974	2.435
1_January_24_2015_31125343	1644-2639	1_December_10_2014_32205515	1200-2280	83	82.98	100	1.572	1.966	1.556	3.532	2.232
1_January_24_2015_31125343	1644-2639	1_December_10_2014_32352765	3157-4245	84	81.48	100	1.675	1.864	1.653	3.548	2.271
1_January_24_2015_31125343	1644-2639	1_December_10_2014_32362937	186-1140	87	85.09	91.83	1.682	1.936	1.417	3.596	2.262
1_January_24_2015_31125343	1644-2639	1_December_10_2014_33231625	641-1671	85	80.91	91.83	1.822	2.029	1.742	3.474	2.152
1_January_24_2015_31125343	1644-2639	1_December_10_2014_33242062	1661-2699	93	78.58	100	1.813	2.074	1.673	3.799	2.427
1_January_24_2015_31125343	1644-2639	1_December_10_2014_33265937	1583-2619	90	83.56	100	1.651	1.927	1.633	3.604	2.32
1_January_24_2015_31125343	1644-2639	1_December_10_2014_33323687	1657-2657	90	80.77	100	1.339	1.868	1.566	3.305	2.06
1_January_24_2015_31125343	1644-2639	1_December_10_2014_33417046	993-2002	86	82.31	100	1.663	1.937	1.506	3.852	2.206
1_January_24_2015_31125343	1644-2639	1_December_10_2014_33422125	116-1138	91	84.13	100	1.656	1.984	1.492	3.569	2.285
1_January_24_2015_31125343	1644-2639	1_December_10_2014_33805000	1288-2205	87	80.47	91.83	1.784	2.053	1.529	3.42	2.395
1_January_24_2015_31125343	1644-2639	1_December_10_2014_33810093	416-1434	86	83.12	100	1.499	1.826	1.499	3.316	2.246
1_January_24_2015_31125343	1644-2639	1_December_10_2014_38365578	1251-2449	85	83.39	100	1.568	1.908	1.453	3.45	2.272
1_January_24_2015_31125343	1644-2639	1_December_10_2014_38444296	3009-4005	86	80.7	100	1.589	1.972	1.501	3.306	2.347
1_January_24_2015_31125343	1644-2639	1_December_10_2014_38496671	2070-3063	88	79.6	100	1.708	1.747	1.459	3.521	2.292
1_January_24_2015_31228906	716-1718	1_December_10_2014_29923015	1863-2891	85	83.46	100	1.578	1.858	1.519	3.276	2.32
1_January_24_2015_31228906	716-1718	1_December_10_2014_29929546	2-1015	92	82.71	100	1.562	1.819	1.533	3.587	2.285
1_January_24_2015_31228906	716-1718	1_December_10_2014_30169328	274-1286	93	84.24	89.55	0.759	1.517	4.181	1.877	0.95
1_January_24_2015_31228906	716-1718	1_December_10_2014_30282109	208-1199	91	78.8	82.45	0.755	1.609	5.106	2.626	1.045
1_January_24_2015_31228906	716-1718	1_December_10_2014_30390656	255-1287	93	81.87	85.1	0.762	1.446	3.804	1.921	0.927
1_January_24_2015_31228906	716-1718	1_December_10_2014_32200406	797-1857	91	85.81	82.2	0.795	1.49	4.262	1.969	0.967
1_January_24_2015_31228906	716-1718	1_December_10_2014_32205515	1200-2280	85	83.34	84.52	0.761	1.493	4.688	2.096	0.912
1_January_24_2015_31228906	716-1718	1_December_10_2014_32352765	3157-4245	85	82.33	73.69	0.788	1.516	5.095	2.171	0.953
1_January_24_2015_31228906	716-1718	1_December_10_2014_32362937	186-1140	89	80.51	79.49	0.801	1.471	4.061	1.76	0.907
1_January_24_2015_31228906	716-1718	1_December_10_2014_33231625	641-1671	86	78.87	89.55	0.786	1.509	4.454	2.093	1.004
1_January_24_2015_31228906	716-1718	1_December_10_2014_33242062	1661-2699	85	83.65	100	0.758	1.428	3.97	1.832	0.907
1_January_24_2015_31228906	716-1718	1_December_10_2014_33265937	1583-2619	93	85.17	100	0.769	1.395	4.168	1.703	0.932
1_January_24_2015_31228906	716-1718	1_December_10_2014_33323687	1657-2657	90	83.78	89.55	0.764	1.526	4.25	1.865	0.939
1_January_24_2015_31228906	716-1718	1_December_10_2014_33417046	993-2002	83	77.18	60.73	0.856	1.545	5.085	2.365	0.891
1_January_24_2015_31228906	716-1718	1_December_10_2014_33422125	116-1138	88	78.82	89.55	0.714	1.566	4.814	2.181	1.055
1_January_24_2015_31228906	716-1718	1_December_10_2014_33805000	1288-2205	88	85.43	69.63	0.777	1.441	4.059	1.782	0.948
1_January_24_2015_31228906	716-1718	1_December_10_2014_33810093	416-1434	93	82.73	89.55	0.786	1.356	3.978	1.647	0.881
1_January_24_2015_31228906	716-1718	1_December_10_2014_38365578	1251-2449	85	83.28	67.5	0.755	1.386	4.133	1.784	0.955
1_January_24_2015_31228906	716-1718	1_December_10_2014_38444296	3009-4005	92	86.37	89.74	0.786	1.439	4.087	1.826	0.945
1_January_24_2015_31228906	716-1718	1_December_10_2014_38496671	2070-3063	91	78.18	92.45	0.763	1.465	4.38	2.147	1.023
1_January_24_2015_31819593	3932-4943	1_December_10_2014_29923015	1863-2891	93	82.83	70.4	0.767	1.437	4.057	1.807	0.912
1_January_24_2015_31819593	3932-4943	1_December_10_2014_29929546	2-1015	88	81.83	57.83	0.743	1.355	3.767	1.721	0.939
1_January_24_2015_31819593	3932-4943	1_December_10_2014_30169328	274-1286	88	83.2	89.55	0.748	1.49	4.061	2.108	0.915
1_January_24_2015_31819593	3932-4943	1_December_10_2014_30282109	208-1199	86	81.55	73.11	0.758	1.434	4.109	1.852	0.914
1_January_24_2015_31819593	3932-4943	1_December_10_2014_30390656	255-1287	87	84.99	89.55	0.734	1.389	4.099	1.644	0.935
1_January_24_2015_31819593	3932-4943	1_December_10_2014_32200406	797-1857	85	80.99	89.94	0.772	1.477	4.128	1.76	0.899
1_January_24_2015_31819593	3932-4943	1_December_10_2014_32205515	1200-2280	85	82.74	70.66	0.7	1.412	3.862	1.887	0.876
1_January_24_2015_31819593	3932-4943	1_December_10_2014_32352765	3157-4245	88	71.62	54.92	0.709	1.565	4.657	2.68	0.962
1_January_24_2015_31819593	3932-4943	1_December_10_2014_32362937	186-1140	90	83.13	100	0.659	1.379	3.571	1.952	0.862
1_January_24_2015_31819593	3932-4943	1_December_10_2014_33231625	641-1671	93	78.08	71.25	0.759	1.378	3.903	2	0.902
1_January_24_2015_31819593	3932-4943	1_December_10_2014_33242062	1661-2699	89	78.52	71.85	0.723	1.418	4.245	2.146	0.845
1_January_24_2015_31819593	3932-4943	1_December_10_2014_33265937	1583-2619	90	78.02	72.63	0.703	1.474	4.634	2.169	0.881
1_January_24_2015_31819593	3932-4943	1_December_10_2014_33323687	1657-2657	88	85.32	77.95	0.681	1.399	3.798	1.832	0.87
1_January_24_2015_31819593	3932-4943	1_December_10_2014_33417046	993-2002	89	79.5	62.79	0.717	1.471	4.053	2.162	0.934
1_January_24_2015_31819593	3932-4943	1_December_10_2014_33422125	116-1138	86	84.21	70.66	0.689	1.379	3.663	1.897	0.842
1_January_24_2015_31819593	3932-4943	1_December_10_2014_33805000	1288-2205	93	82.91	70.66	0.709	1.327	3.917	1.769	0.867
1_January_24_2015_31819593	3932-4943	1_December_10_2014_33810093	416-1434	91	81.78	70.66	0.761	1.406	3.901	1.915	0.866
1_January_24_2015_31819593	3932-4943	1_December_10_2014_38365578	1251-2449	92	73.51	51.57	0.714	1.479	4.497	2.465	0.816
1_January_24_2015_31819593	3932-4943	1_December_10_2014_38444296	3009-4005	87	76.86	89.96	0.678	1.469	4.426	2.246	0.964
1_January_24_2015_31819593	3932-4943	1_December_10_2014_38496671	2070-3063	90	82.36	100	0.68	1.348	3.834	1.844	0.874
1_January_24_2015_31824687	966-1993	1_December_10_2014_29923015	1863-2891	88	86.67	100	0.709	1.362	3.839	1.826	0.882
1_January_24_2015_31824687	966-1993	1_December_10_2014_29929546	2-1015	91	76.9	92.12	0.727	1.379	4.04	2.255	0.943
1_January_24_2015_31824687	966-1993	1_December_10_2014_30169328	274-1286	85	83.69	77.55	0.698	1.344	3.587	1.757	0.758
1_January_24_2015_31824687	966-1993	1_December_10_2014_30282109	208-1199	90	84.01	100	0.671	1.405	3.689	1.824	0.86
1_January_24_2015_31824687	966-1993	1_December_10_2014_30390656	255-1287	91	81.06	100	0.681	1.342	3.781	1.842	0.888
1_January_24_2015_31824687	966-1993	1_December_10_2014_32200406	797-1857	89	83.74	85.03	0.722	1.296	3.503	1.793	0.852
1_January_24_2015_31824687	966-1993	1_December_10_2014_32205515	1200-2280	88	79.97	100	0.705	1.39	3.78	2.154	0.839
1_January_24_2015_31824687	966-1993	1_December_10_2014_32352765	3157-4245	90	86.86	100	0.683	1.353	3.749	1.823	0.875
1_January_24_2015_31824687	966-1993	1_December_10_2014_32362937	186-1140	88	84.02	100	0.725	1.311	3.78	1.683	0.878
1_January_24_2015_31824687	966-1993	1_December_10_2014_33231625	641-1671	85	85.06	79.69	1.677	1.853	1.49	3.844	2.295
1_January_24_2015_31824687	966-1993	1_December_10_2014_33242062	1661-2699	91	86.24	100	1.706	1.94	1.593	4.063	2.338
1_January_24_2015_31824687	966-1993	1_December_10_2014_33265937	1583-2619	88	76.44	38.96	1.909	2.04	1.779	4.155	2.434
1_January_24_2015_31824687	966-1993	1_December_10_2014_33323687	1657-2657	87	85.77	100	1.579	1.845	1.708	3.626	2.322
1_January_24_2015_31824687	966-1993	1_December_10_2014_33417046	993-2002	89	83.67	90.9	1.953	1.884	1.551	4.058	2.349
1_January_24_2015_31824687	966-1993	1_December_10_2014_33422125	116-1138	88	83.26	86.07	1.761	1.852	1.689	3.742	2.236
1_January_24_2015_31824687	966-1993	1_December_10_2014_33805000	1288-2205	88	84.02	100	1.813	1.904	1.587	3.734	2.354
1_January_24_2015_31824687	966-1993	1_December_10_2014_33810093	416-1434	83	84.45	100	1.552	1.812	1.702	3.692	2.248
1_January_24_2015_31824687	966-1993	1_December_10_2014_38365578	1251-2449	89	77.77	61.7	1.896	1.972	1.751	4.256	2.432
1_January_24_2015_31824687	966-1993	1_December_10_2014_38444296	3009-4005	93	85.53	100	1.565	1.863	1.596	3.77	2.241
1_January_24_2015_31824687	966-1993	1_December_10_2014_38496671	2070-3063	86	85.4	100	1.63	1.749	1.664	3.776	2.286
				87.64

## Sheet: yellow 14 black 45
black 45-tutor	black 45-duration	yellow 14	yellow 14-duration	% similarity	accuarcy	% sequential	Pitch diff	FM diff	Entropy diff	Goodness diff	AM diff
3_January_24_2015_32765078	581-1310	3_December_10_2014_33961312	873-1659	74	52.1025	49.56	1.172	1.494	2.825	4.799	0.882
3_January_24_2015_32765078	581-1310	3_December_10_2014_34192828	1001-1817	61	55.725	38.7	1.545	1.434	4	5.257	1.08
3_January_24_2015_32765078	581-1310	3_December_10_2014_34252609	1547-2339	69	54.3	28.15	1.566	1.548	3.415	5.34	1.058
3_January_24_2015_32765078	581-1310	3_December_10_2014_34279890	3680-4462	72	50.5725	50.14	1.555	1.596	3.484	5.154	1.109
3_January_24_2015_32765078	581-1310	3_December_10_2014_34296765	1484-2294	77	52.785	72.14	1.27	1.341	2.413	5.008	0.965
3_January_24_2015_32765078	581-1310	3_December_10_2014_34327453	2473-3261	71	53.4375	43.1	1.283	1.555	2.542	4.929	0.98
3_January_24_2015_32765078	581-1310	3_December_10_2014_34342453	3512-4294	69	54.5925	72.14	1.3	1.409	3.059	4.982	1.033
3_January_24_2015_32765078	581-1310	3_December_10_2014_34356843	463-1257	67	53.235	76.53	1.244	1.475	2.599	5.044	0.96
3_January_24_2015_32765078	581-1310	3_December_10_2014_34367859	238-1025	64	53.5575	46.33	1.461	1.419	3.809	5.354	1.048
3_January_24_2015_32765078	581-1310	3_December_10_2014_34392531	1503-2292	69	52.4025	45.45	1.679	1.624	3.517	5.01	1.062
3_January_24_2015_32765078	581-1310	3_December_10_2014_34416437	809-1587	75	52.77	30.49	1.329	1.477	2.757	5.145	0.984
3_January_24_2015_32765078	581-1310	3_December_10_2014_34473453	4059-4837	72	52.6275	41.05	1.265	1.395	2.784	4.843	0.997
3_January_24_2015_32765078	581-1310	3_December_10_2014_34551687	2120-2892	61	57.12	46.33	1.498	1.493	3.509	5.346	1.058
3_January_24_2015_32765078	581-1310	3_December_10_2014_34569734	1237-2019	68	51.87	47.8	1.175	1.378	2.723	4.783	0.981
3_January_24_2015_32765078	581-1310	3_December_10_2014_34610125	223-522	74	53.505	51.31	1.234	1.53	2.646	4.984	1.031
3_January_24_2015_32765078	581-1310	3_December_10_2014_34783343	382-1160	76	54.435	100	1.276	1.502	2.72	4.923	1.042
3_January_24_2015_32765078	581-1310	3_December_10_2014_34927984	249-1040	72	53.8425	100	1.337	1.45	2.878	5.211	1.002
3_January_24_2015_32765078	581-1310	3_December_10_2014_34989171	254-1047	73	53.955	100	1.271	1.462	2.832	4.956	0.92
3_January_24_2015_32765078	581-1310	3_December_10_2014_35079015	2136-2932	68	53.64	34.89	1.399	1.512	3.053	4.947	0.992
3_January_24_2015_32765078	581-1310	3_December_10_2014_35136843	304-1101	71	55.05	45.16	1.586	1.458	4.079	4.811	1.112
3_January_24_2015_32759953	3209-3925	3_December_10_2014_33961312	873-1659	63	52.02	59.3	1.07	1.532	3.739	4.428	0.932
3_January_24_2015_32759953	3209-3925	3_December_10_2014_34192828	1001-1817	48	53.505	54.36	1.49	1.526	5.521	5.098	1.133
3_January_24_2015_32759953	3209-3925	3_December_10_2014_34252609	1547-2339	64	54.7125	54.06	1.492	1.636	4.615	5.189	1.105
3_January_24_2015_32759953	3209-3925	3_December_10_2014_34279890	3680-4462	62	51.0675	79.94	1.517	1.69	4.807	4.954	1.156
3_January_24_2015_32759953	3209-3925	3_December_10_2014_34296765	1484-2294	69	55.0425	58.43	1.058	1.482	3.207	4.646	1.038
3_January_24_2015_32759953	3209-3925	3_December_10_2014_34327453	2473-3261	69	55.7625	74.12	1.196	1.601	3.37	4.572	1.021
3_January_24_2015_32759953	3209-3925	3_December_10_2014_34342453	3512-4294	66	54.6975	68.6	1.235	1.483	4.167	4.684	1.079
3_January_24_2015_32759953	3209-3925	3_December_10_2014_34356843	463-1257	70	55.3875	63.08	1.132	1.526	3.339	4.662	1.005
3_January_24_2015_32759953	3209-3925	3_December_10_2014_34367859	238-1025	55	55.155	42.73	1.399	1.528	5.277	5.154	1.085
3_January_24_2015_32759953	3209-3925	3_December_10_2014_34392531	1503-2292	57	51.0825	47.96	1.631	1.726	4.843	4.855	1.115
3_January_24_2015_32759953	3209-3925	3_December_10_2014_34416437	809-1587	67	55.29	54.06	1.227	1.519	3.734	4.834	1.028
3_January_24_2015_32759953	3209-3925	3_December_10_2014_34473453	4059-4837	62	55.74	56.68	1.187	1.455	3.78	4.475	1.038
3_January_24_2015_32759953	3209-3925	3_December_10_2014_34551687	2120-2892	58	55.7925	38.95	1.433	1.592	4.865	5.182	1.105
3_January_24_2015_32759953	3209-3925	3_December_10_2014_34569734	1237-2019	64	55.6875	59.01	1.078	1.433	3.56	4.386	1.027
3_January_24_2015_32759953	3209-3925	3_December_10_2014_34610125	223-522	71	53.4975	60.17	1.155	1.599	3.545	4.7	1.088
3_January_24_2015_32759953	3209-3925	3_December_10_2014_34783343	382-1160	70	56.04	74.12	1.188	1.584	3.704	4.638	1.087
3_January_24_2015_32759953	3209-3925	3_December_10_2014_34927984	249-1040	67	54.7575	42.44	1.257	1.499	3.846	4.893	1.039
3_January_24_2015_32759953	3209-3925	3_December_10_2014_34989171	254-1047	69	54.735	74.12	1.165	1.507	3.747	4.617	0.967
3_January_24_2015_32759953	3209-3925	3_December_10_2014_35079015	2136-2932	68	54.9975	40.69	1.34	1.592	4.152	4.701	1.039
3_January_24_2015_32759953	3209-3925	3_December_10_2014_35136843	304-1101	55	50.37	46.51	1.536	1.583	5.655	4.614	1.157
3_January_24_2015_32028546	3580-4300	3_December_10_2014_33961312	873-1659	66	53.5125	56.8	1.114	1.577	3.02	4.32	0.862
3_January_24_2015_32028546	3580-4300	3_December_10_2014_34192828	1001-1817	51	55.5075	53.71	1.537	1.55	4.404	4.962	1.065
3_January_24_2015_32028546	3580-4300	3_December_10_2014_34252609	1547-2339	60	55.35	53.99	1.544	1.667	3.719	5.059	1.028
3_January_24_2015_32028546	3580-4300	3_December_10_2014_34279890	3680-4462	55	52.29	47.26	1.565	1.717	3.843	4.826	1.082
3_January_24_2015_32028546	3580-4300	3_December_10_2014_34296765	1484-2294	72	55.2225	49.64	1.206	1.437	2.572	4.51	0.932
3_January_24_2015_32028546	3580-4300	3_December_10_2014_34327453	2473-3261	66	52.8375	35.58	1.244	1.642	2.695	4.466	0.95
3_January_24_2015_32028546	3580-4300	3_December_10_2014_34342453	3512-4294	66	54.45	63.71	1.288	1.517	3.336	4.564	1.004
3_January_24_2015_32028546	3580-4300	3_December_10_2014_34356843	463-1257	68	54.5475	54.08	1.177	1.567	2.733	4.553	0.933
3_January_24_2015_32028546	3580-4300	3_December_10_2014_34367859	238-1025	55	55.3425	39.8	1.45	1.544	4.217	5.01	1.018
3_January_24_2015_32028546	3580-4300	3_December_10_2014_34392531	1503-2292	56	52.6425	70.46	1.683	1.747	3.863	4.715	1.047
3_January_24_2015_32028546	3580-4300	3_December_10_2014_34416437	809-1587	62	56.0175	59.21	1.273	1.561	2.976	4.721	0.963
3_January_24_2015_32028546	3580-4300	3_December_10_2014_34473453	4059-4837	63	56.5125	55.83	1.237	1.495	3.014	4.373	0.951
3_January_24_2015_32028546	3580-4300	3_December_10_2014_34551687	2120-2892	56	57.39	38.67	1.486	1.611	3.872	5.05	1.017
3_January_24_2015_32028546	3580-4300	3_December_10_2014_34569734	1237-2019	66	52.9725	38.95	1.122	1.468	2.888	4.279	0.964
3_January_24_2015_32028546	3580-4300	3_December_10_2014_34610125	223-522	69	54.705	46.69	1.208	1.639	2.833	4.59	0.999
3_January_24_2015_32028546	3580-4300	3_December_10_2014_34783343	382-1160	68	55.0275	48.24	1.234	1.611	2.948	4.496	1.013
3_January_24_2015_32028546	3580-4300	3_December_10_2014_34927984	249-1040	61	56.0325	34.17	1.304	1.545	3.098	4.779	0.958
3_January_24_2015_32028546	3580-4300	3_December_10_2014_34989171	254-1047	68	53.655	60.05	1.212	1.552	3.031	4.505	0.89
3_January_24_2015_32028546	3580-4300	3_December_10_2014_35079015	2136-2932	59	56.055	53.86	1.389	1.622	3.321	4.58	0.968
3_January_24_2015_32028546	3580-4300	3_December_10_2014_35136843	304-1101	67	55.3275	55.55	1.591	1.601	4.525	4.486	1.084
3_January_24_2015_32023468	2722-3441	3_December_10_2014_33961312	873-1659	66	55.95	48.09	1.176	1.363	3.001	4.607	0.807
3_January_24_2015_32023468	2722-3441	3_December_10_2014_34192828	1001-1817	54	57.195	74.04	1.586	1.352	3.972	5.192	1.004
3_January_24_2015_32023468	2722-3441	3_December_10_2014_34252609	1547-2339	65	54.5175	67.55	1.589	1.462	3.474	5.279	0.985
3_January_24_2015_32023468	2722-3441	3_December_10_2014_34279890	3680-4462	64	53.16	63.32	1.607	1.515	3.543	5.065	1.032
3_January_24_2015_32023468	2722-3441	3_December_10_2014_34296765	1484-2294	69	54.045	100	1.262	1.227	2.602	4.814	0.877
3_January_24_2015_32023468	2722-3441	3_December_10_2014_34327453	2473-3261	61	53.4975	54.94	1.305	1.434	2.721	4.777	0.894
3_January_24_2015_32023468	2722-3441	3_December_10_2014_34342453	3512-4294	70	54.9825	100	1.338	1.315	3.179	4.844	0.948
3_January_24_2015_32023468	2722-3441	3_December_10_2014_34356843	463-1257	63	53.775	56.55	1.242	1.358	2.82	4.87	0.879
3_January_24_2015_32023468	2722-3441	3_December_10_2014_34367859	238-1025	59	54.825	68.97	1.498	1.352	3.827	5.238	0.964
3_January_24_2015_32023468	2722-3441	3_December_10_2014_34392531	1503-2292	66	52.8975	62.76	1.728	1.555	3.561	4.938	0.992
3_January_24_2015_32023468	2722-3441	3_December_10_2014_34416437	809-1587	64	55.77	33.87	1.343	1.359	2.916	4.968	0.883
3_January_24_2015_32023468	2722-3441	3_December_10_2014_34473453	4059-4837	60	53.985	56.84	1.288	1.286	2.941	4.684	0.899
3_January_24_2015_32023468	2722-3441	3_December_10_2014_34551687	2120-2892	58	57.495	70.94	1.535	1.42	3.552	5.276	0.991
3_January_24_2015_32023468	2722-3441	3_December_10_2014_34569734	1237-2019	67	53.805	36.97	1.186	1.261	2.916	4.598	0.897
3_January_24_2015_32023468	2722-3441	3_December_10_2014_34610125	223-522	71	52.1325	100	1.258	1.434	2.813	4.859	0.959
3_January_24_2015_32023468	2722-3441	3_December_10_2014_34783343	382-1160	74	53.4525	100	1.288	1.411	2.865	4.772	0.957
3_January_24_2015_32023468	2722-3441	3_December_10_2014_34927984	249-1040	69	55.395	100	1.361	1.33	3.024	5.078	0.909
3_January_24_2015_32023468	2722-3441	3_December_10_2014_34989171	254-1047	69	55.41	88.99	1.274	1.338	2.995	4.808	0.844
3_January_24_2015_32023468	2722-3441	3_December_10_2014_35079015	2136-2932	64	54.435	71.22	1.439	1.42	3.176	4.84	0.913
3_January_24_2015_32023468	2722-3441	3_December_10_2014_35136843	304-1101	56	56.1375	67.55	1.641	1.41	4.066	4.726	1.019
3_January_24_2015_31930890	1560-2282	3_December_10_2014_33961312	873-1659	66	53.4525	56.68	1.119	1.576	3.033	4.317	0.861
3_January_24_2015_31930890	1560-2282	3_December_10_2014_34192828	1001-1817	66	55.5075	53.58	1.542	1.551	4.406	4.969	1.051
3_January_24_2015_31930890	1560-2282	3_December_10_2014_34252609	1547-2339	60	55.3575	53.86	1.551	1.67	3.718	5.066	1.011
3_January_24_2015_31930890	1560-2282	3_December_10_2014_34279890	3680-4462	55	52.3575	46.55	1.566	1.717	3.837	4.822	1.088
3_January_24_2015_31930890	1560-2282	3_December_10_2014_34296765	1484-2294	72	55.2075	49.64	1.208	1.439	2.567	4.508	0.929
3_January_24_2015_31930890	1560-2282	3_December_10_2014_34327453	2473-3261	66	52.8825	35.58	1.248	1.646	2.695	4.467	0.946
3_January_24_2015_31930890	1560-2282	3_December_10_2014_34342453	3512-4294	66	54.2025	63.43	1.29	1.521	3.345	4.561	1
3_January_24_2015_31930890	1560-2282	3_December_10_2014_34356843	463-1257	68	54.51	54.08	1.177	1.565	2.732	4.557	0.936
3_January_24_2015_31930890	1560-2282	3_December_10_2014_34367859	238-1025	69	55.545	39.8	1.45	1.543	4.223	5.009	1.006
3_January_24_2015_31930890	1560-2282	3_December_10_2014_34392531	1503-2292	56	52.875	70.46	1.679	1.75	3.854	4.722	1.043
3_January_24_2015_31930890	1560-2282	3_December_10_2014_34416437	809-1587	61	56.085	59.21	1.281	1.571	2.981	4.696	0.931
3_January_24_2015_31930890	1560-2282	3_December_10_2014_34473453	4059-4837	63	56.355	55.83	1.239	1.49	3	4.374	0.949
3_January_24_2015_31930890	1560-2282	3_December_10_2014_34551687	2120-2892	56	57.5475	38.67	1.486	1.61	3.866	5.053	1.011
3_January_24_2015_31930890	1560-2282	3_December_10_2014_34569734	1237-2019	65	52.92	38.95	1.129	1.472	2.896	4.284	0.938
3_January_24_2015_31930890	1560-2282	3_December_10_2014_34610125	223-522	69	54.69	46.69	1.207	1.637	2.835	4.588	1.004
3_January_24_2015_31930890	1560-2282	3_December_10_2014_34783343	382-1160	69	54.7875	48.24	1.235	1.61	2.95	4.502	1.006
3_January_24_2015_31930890	1560-2282	3_December_10_2014_34927984	249-1040	61	55.6125	34.45	1.309	1.54	3.088	4.791	0.956
3_January_24_2015_31930890	1560-2282	3_December_10_2014_34989171	254-1047	68	53.55	60.05	1.213	1.551	3.027	4.508	0.889
3_January_24_2015_31930890	1560-2282	3_December_10_2014_35079015	2136-2932	59	55.9725	53.86	1.395	1.62	3.326	4.585	0.958
3_January_24_2015_31930890	1560-2282	3_December_10_2014_35136843	304-1101	75	55.1025	55.55	1.587	1.599	4.515	4.486	1.082
3_January_24_2015_31883109	1588-2318	3_December_10_2014_33961312	873-1659	63	53.31	66.05	1.108	1.545	2.848	4.65	0.882
3_January_24_2015_31883109	1588-2318	3_December_10_2014_34192828	1001-1817	60	57.315	58.98	1.498	1.485	3.673	5.138	1.081
3_January_24_2015_31883109	1588-2318	3_December_10_2014_34252609	1547-2339	67	54.8325	83.3	1.515	1.6	3.261	5.216	1.054
3_January_24_2015_31883109	1588-2318	3_December_10_2014_34279890	3680-4462	62	52.9125	42.29	1.526	1.659	3.314	5.009	1.104
3_January_24_2015_31883109	1588-2318	3_December_10_2014_34296765	1484-2294	60	54.54	61.74	1.207	1.393	2.458	4.882	0.957
3_January_24_2015_31883109	1588-2318	3_December_10_2014_34327453	2473-3261	76	54.2625	63.79	1.232	1.611	2.594	4.84	0.973
3_January_24_2015_31883109	1588-2318	3_December_10_2014_34342453	3512-4294	63	54.93	60.11	1.253	1.462	2.975	4.877	1.026
3_January_24_2015_31883109	1588-2318	3_December_10_2014_34356843	463-1257	64	53.625	54.17	1.184	1.533	2.708	4.955	0.947
3_January_24_2015_31883109	1588-2318	3_December_10_2014_34367859	238-1025	63	56.1075	55.58	1.421	1.466	3.547	5.208	1.032
3_January_24_2015_31883109	1588-2318	3_December_10_2014_34392531	1503-2292	64	54.96	82.74	1.636	1.674	3.303	4.891	1.062
3_January_24_2015_31883109	1588-2318	3_December_10_2014_34416437	809-1587	66	54.135	38.38	1.271	1.534	2.742	5.024	0.982
3_January_24_2015_31883109	1588-2318	3_December_10_2014_34473453	4059-4837	60	56.34	54.73	1.219	1.455	2.764	4.765	0.977
3_January_24_2015_31883109	1588-2318	3_December_10_2014_34551687	2120-2892	61	57.6225	82.74	1.456	1.544	3.297	5.217	1.036
3_January_24_2015_31883109	1588-2318	3_December_10_2014_34569734	1237-2019	60	52.8225	53.47	1.117	1.432	2.776	4.697	0.979
3_January_24_2015_31883109	1588-2318	3_December_10_2014_34610125	223-522	64	54.7275	42.24	1.183	1.584	2.661	4.879	1.033
3_January_24_2015_31883109	1588-2318	3_December_10_2014_34783343	382-1160	68	54.78	52.75	1.219	1.551	2.69	4.791	1.039
3_January_24_2015_31883109	1588-2318	3_December_10_2014_34927984	249-1040	63	56.0175	54.17	1.289	1.508	2.862	5.114	0.984
3_January_24_2015_31883109	1588-2318	3_December_10_2014_34989171	254-1047	64	53.9625	58.98	1.213	1.519	2.844	4.863	0.915
3_January_24_2015_31883109	1588-2318	3_December_10_2014_35079015	2136-2932	62	55.3425	40.78	1.356	1.565	2.981	4.824	0.991
3_January_24_2015_31883109	1588-2318	3_December_10_2014_35136843	304-1101	55	58.215	56.43	1.542	1.511	3.736	4.693	1.106
3_January_24_2015_31866906	1735-2452	3_December_10_2014_33961312	873-1659	64	51.5625	59.94	1.179	1.528	3.142	4.64	0.853
3_January_24_2015_31866906	1735-2452	3_December_10_2014_34192828	1001-1817	61	54.0825	50.72	1.557	1.486	4.194	5.148	1.047
3_January_24_2015_31866906	1735-2452	3_December_10_2014_34252609	1547-2339	66	55.485	70.6	1.577	1.598	3.662	5.226	1.02
3_January_24_2015_31866906	1735-2452	3_December_10_2014_34279890	3680-4462	63	53.7525	34	1.578	1.655	3.747	5.015	1.077
3_January_24_2015_31866906	1735-2452	3_December_10_2014_34296765	1484-2294	64	56.355	67.78	1.282	1.381	2.732	4.858	0.927
3_January_24_2015_31866906	1735-2452	3_December_10_2014_34327453	2473-3261	59	50.6025	71.46	1.306	1.593	2.862	4.82	0.939
3_January_24_2015_31866906	1735-2452	3_December_10_2014_34342453	3512-4294	68	55.4925	81.26	1.312	1.454	3.338	4.865	0.998
3_January_24_2015_31866906	1735-2452	3_December_10_2014_34356843	463-1257	66	53.6925	73.81	1.262	1.516	2.946	4.928	0.918
3_January_24_2015_31866906	1735-2452	3_December_10_2014_34367859	238-1025	59	55.4325	44.95	1.48	1.472	4.041	5.209	0.997
3_January_24_2015_31866906	1735-2452	3_December_10_2014_34392531	1503-2292	62	52.8525	53.89	1.695	1.678	3.756	4.888	1.037
3_January_24_2015_31866906	1735-2452	3_December_10_2014_34416437	809-1587	59	56.8125	72.62	1.347	1.514	3.065	4.998	0.951
3_January_24_2015_31866906	1735-2452	3_December_10_2014_34473453	4059-4837	61	56.1075	52.16	1.283	1.438	3.091	4.735	0.961
3_January_24_2015_31866906	1735-2452	3_December_10_2014_34551687	2120-2892	61	57.8025	58.78	1.516	1.545	3.745	5.228	1.007
3_January_24_2015_31866906	1735-2452	3_December_10_2014_34569734	1237-2019	64	51.9375	76.08	1.191	1.415	3.051	4.655	0.948
3_January_24_2015_31866906	1735-2452	3_December_10_2014_34610125	223-522	70	55.98	56.19	1.251	1.581	2.952	4.875	0.984
3_January_24_2015_31866906	1735-2452	3_December_10_2014_34783343	382-1160	64	56.085	81.55	1.287	1.548	3.02	4.777	1.004
3_January_24_2015_31866906	1735-2452	3_December_10_2014_34927984	249-1040	63	56.1525	59.35	1.354	1.486	3.176	5.103	0.955
3_January_24_2015_31866906	1735-2452	3_December_10_2014_34989171	254-1047	64	54.765	68.58	1.288	1.501	3.146	4.839	0.881
3_January_24_2015_31866906	1735-2452	3_December_10_2014_35079015	2136-2932	64	55.905	56.48	1.414	1.558	3.335	4.826	0.963
3_January_24_2015_31866906	1735-2452	3_December_10_2014_35136843	304-1101	58	53.5575	55.61	1.604	1.525	4.279	4.694	1.07
3_January_24_2015_31861828	3890-4601	3_December_10_2014_33961312	873-1659	74	52.53	52.14	1.14	1.517	3.313	4.331	0.869
3_January_24_2015_31861828	3890-4601	3_December_10_2014_34192828	1001-1817	63	49.665	53.86	1.572	1.496	4.733	5.008	1.057
3_January_24_2015_31861828	3890-4601	3_December_10_2014_34252609	1547-2339	67	51.87	50.71	1.571	1.612	4.016	5.102	1.04
3_January_24_2015_31861828	3890-4601	3_December_10_2014_34279890	3680-4462	66	51.165	76.79	1.598	1.665	4.148	4.857	1.093
3_January_24_2015_31861828	3890-4601	3_December_10_2014_34296765	1484-2294	73	52.6125	51.28	1.227	1.382	2.871	4.512	0.951
3_January_24_2015_31861828	3890-4601	3_December_10_2014_34327453	2473-3261	63	52.2825	42.12	1.319	1.591	3.013	4.318	0.97
3_January_24_2015_31861828	3890-4601	3_December_10_2014_34342453	3512-4294	67	54.81	75.64	1.317	1.463	3.636	4.588	1.009
3_January_24_2015_31861828	3890-4601	3_December_10_2014_34356843	463-1257	72	52.9125	57.59	1.201	1.512	3.015	4.566	0.934
3_January_24_2015_31861828	3890-4601	3_December_10_2014_34367859	238-1025	62	51.645	53.29	1.476	1.493	4.54	5.043	1.021
3_January_24_2015_31861828	3890-4601	3_December_10_2014_34392531	1503-2292	60	52.0425	49.57	1.718	1.698	4.185	4.761	1.045
3_January_24_2015_31861828	3890-4601	3_December_10_2014_34416437	809-1587	71	50.7525	50.42	1.3	1.509	3.276	4.714	0.965
3_January_24_2015_31861828	3890-4601	3_December_10_2014_34473453	4059-4837	74	54.225	61.03	1.259	1.437	3.304	4.378	0.976
3_January_24_2015_31861828	3890-4601	3_December_10_2014_34551687	2120-2892	64	52.3725	68.19	1.514	1.559	4.183	5.092	1.032
3_January_24_2015_31861828	3890-4601	3_December_10_2014_34569734	1237-2019	72	53.7975	44.98	1.15	1.415	3.179	4.285	0.959
3_January_24_2015_31861828	3890-4601	3_December_10_2014_34610125	223-522	62	52.845	44.98	1.233	1.581	3.117	4.614	1.007
3_January_24_2015_31861828	3890-4601	3_December_10_2014_34783343	382-1160	71	54.585	67.62	1.261	1.555	3.242	4.525	1.013
3_January_24_2015_31861828	3890-4601	3_December_10_2014_34927984	249-1040	71	51.57	51.57	1.332	1.487	3.385	4.799	0.971
3_January_24_2015_31861828	3890-4601	3_December_10_2014_34989171	254-1047	69	52.4625	38.2	1.236	1.494	3.308	4.524	0.9
3_January_24_2015_31861828	3890-4601	3_December_10_2014_35079015	2136-2932	71	52.3725	67.62	1.414	1.565	3.611	4.612	0.977
3_January_24_2015_31861828	3890-4601	3_December_10_2014_35136843	304-1101	56	52.2675	65.32	1.614	1.544	4.822	4.522	1.097
3_January_24_2015_31825562	3920-4640	3_December_10_2014_33961312	873-1659	66	55.62	68.13	1.096	1.342	2.938	5.26	0.818
3_January_24_2015_31825562	3920-4640	3_December_10_2014_34192828	1001-1817	51	57.3	60.17	1.527	1.37	3.981	5.755	1.004
3_January_24_2015_31825562	3920-4640	3_December_10_2014_34252609	1547-2339	69	54.045	41.39	1.522	1.482	3.449	5.831	0.991
3_January_24_2015_31825562	3920-4640	3_December_10_2014_34279890	3680-4462	59	53.265	62.95	1.55	1.532	3.531	5.625	1.042
3_January_24_2015_31825562	3920-4640	3_December_10_2014_34296765	1484-2294	68	53.5275	64.43	1.178	1.223	2.533	5.482	0.897
3_January_24_2015_31825562	3920-4640	3_December_10_2014_34327453	2473-3261	63	54.8175	54.19	1.221	1.411	2.655	5.451	0.909
3_January_24_2015_31825562	3920-4640	3_December_10_2014_34342453	3512-4294	69	53.2875	89.47	1.268	1.316	3.131	5.492	0.96
3_January_24_2015_31825562	3920-4640	3_December_10_2014_34356843	463-1257	64	56.865	72.4	1.154	1.341	2.738	5.564	0.889
3_January_24_2015_31825562	3920-4640	3_December_10_2014_34367859	238-1025	56	56.3025	63.3	1.433	1.377	3.815	5.83	0.962
3_January_24_2015_31825562	3920-4640	3_December_10_2014_34392531	1503-2292	60	52.4625	47.36	1.666	1.586	3.55	5.495	0.997
3_January_24_2015_31825562	3920-4640	3_December_10_2014_34416437	809-1587	63	57.7875	58.88	1.253	1.329	2.855	5.618	0.914
3_January_24_2015_31825562	3920-4640	3_December_10_2014_34473453	4059-4837	64	56.01	73.81	1.215	1.272	2.879	5.37	0.919
3_January_24_2015_31825562	3920-4640	3_December_10_2014_34551687	2120-2892	66	55.1175	63.01	1.462	1.437	3.527	5.835	0.986
3_January_24_2015_31825562	3920-4640	3_December_10_2014_34569734	1237-2019	61	57.0525	52.52	1.102	1.25	2.842	5.302	0.904
3_January_24_2015_31825562	3920-4640	3_December_10_2014_34610125	223-522	63	55.74	64.43	1.181	1.43	2.739	5.493	0.966
3_January_24_2015_31825562	3920-4640	3_December_10_2014_34783343	382-1160	65	56.565	66.14	1.213	1.415	2.807	5.403	0.971
3_January_24_2015_31825562	3920-4640	3_December_10_2014_34927984	249-1040	66	55.9725	50.45	1.284	1.314	2.965	5.727	0.926
3_January_24_2015_31825562	3920-4640	3_December_10_2014_34989171	254-1047	65	54.5175	56.47	1.191	1.321	2.932	5.472	0.842
3_January_24_2015_31825562	3920-4640	3_December_10_2014_35079015	2136-2932	63	55.65	59.61	1.367	1.423	3.125	5.44	0.929
3_January_24_2015_31825562	3920-4640	3_December_10_2014_35136843	304-1101	48	57.3675	79.23	1.568	1.446	4.051	5.303	1.042
3_January_24_2015_31798250	2915-3640	3_December_10_2014_33961312	873-1659	68	53.5275	62.33	1.105	1.408	3.139	4.727	0.852
3_January_24_2015_31798250	2915-3640	3_December_10_2014_34192828	1001-1817	64	53.1	23.59	1.512	1.378	3.967	5.286	1.055
3_January_24_2015_31798250	2915-3640	3_December_10_2014_34252609	1547-2339	67	55.0725	63.76	1.518	1.488	3.544	5.368	1.026
3_January_24_2015_31798250	2915-3640	3_December_10_2014_34279890	3680-4462	63	51.6375	62.91	1.535	1.543	3.595	5.159	1.078
3_January_24_2015_31798250	2915-3640	3_December_10_2014_34296765	1484-2294	69	53.805	74.89	1.197	1.267	2.753	4.935	0.93
3_January_24_2015_31798250	2915-3640	3_December_10_2014_34327453	2473-3261	57	52.215	47.5	1.227	1.473	2.883	4.896	0.947
3_January_24_2015_31798250	2915-3640	3_December_10_2014_34342453	3512-4294	69	54.8925	74.89	1.264	1.346	3.27	4.959	0.994
3_January_24_2015_31798250	2915-3640	3_December_10_2014_34356843	463-1257	58	54.27	43.36	1.17	1.396	2.994	5.012	0.925
3_January_24_2015_31798250	2915-3640	3_December_10_2014_34367859	238-1025	66	52.77	56.06	1.428	1.369	3.834	5.35	1.007
3_January_24_2015_31798250	2915-3640	3_December_10_2014_34392531	1503-2292	66	52.4925	74.89	1.656	1.574	3.603	5.028	1.035
3_January_24_2015_31798250	2915-3640	3_December_10_2014_34416437	809-1587	68	53.895	74.89	1.266	1.398	3.037	5.093	0.949
3_January_24_2015_31798250	2915-3640	3_December_10_2014_34473453	4059-4837	66	54.705	36.66	1.218	1.324	3.058	4.812	0.958
3_January_24_2015_31798250	2915-3640	3_December_10_2014_34551687	2120-2892	61	53.3475	52.92	1.463	1.438	3.588	5.366	1.007
3_January_24_2015_31798250	2915-3640	3_December_10_2014_34569734	1237-2019	63	54.2925	60.91	1.111	1.301	3.066	4.744	0.949
3_January_24_2015_31798250	2915-3640	3_December_10_2014_34610125	223-522	70	52.1025	74.89	1.189	1.467	2.948	4.979	0.989
3_January_24_2015_31798250	2915-3640	3_December_10_2014_34783343	382-1160	66	54.225	30.38	1.219	1.437	2.982	4.883	1.004
3_January_24_2015_31798250	2915-3640	3_December_10_2014_34927984	249-1040	67	53.055	53.2	1.285	1.369	3.146	5.188	0.965
3_January_24_2015_31798250	2915-3640	3_December_10_2014_34989171	254-1047	66	55.17	57.48	1.202	1.38	3.131	4.931	0.888
3_January_24_2015_31798250	2915-3640	3_December_10_2014_35079015	2136-2932	61	54.0825	64.62	1.36	1.446	3.265	4.943	0.964
3_January_24_2015_31798250	2915-3640	3_December_10_2014_35136843	304-1101	61	51.7425	58.91	1.566	1.426	4.05	4.821	1.068
				64.64

## Sheet: yellow 29 vs black 33
Tutor-black 33	duration-black 33	yellow 29	duration-yellow 29	%Similarity	Accuracy	%Sequential	Pitch diff	FM diff	Entropy diff	Goodness diff	AM diff
1_January_24_2015_28862750	464-1436	3_May_09_2015_32721406	2498-3519	80	83.77	69.44	1.601	1.974	1.673	4.08	1.979
1_January_24_2015_28862750	464-1436	3_May_09_2015_33128437	2387-3390	80	77.75	70.23	1.575	2.059	1.984	4.179	1.997
1_January_24_2015_28862750	464-1436	3_May_09_2015_33193078	2971-3976	77	84.27	91.46	1.598	1.908	1.825	4.008	1.967
1_January_24_2015_28862750	464-1436	3_May_09_2015_33397750	2101-3111	80	78.81	100	1.572	2.034	1.467	4.457	2.021
1_January_24_2015_28862750	464-1436	3_May_09_2015_33583937	1871-2888	85	83.56	100	1.48	1.932	1.819	4.029	1.961
1_January_24_2015_28862750	464-1436	3_May_09_2015_33778640	1436-2447	85	79.19	69.84	1.378	1.934	1.791	4.418	1.994
1_January_24_2015_28862750	464-1436	3_May_09_2015_34001312	763-1795	79	80.09	82.93	1.578	1.983	1.685	4.373	1.964
1_January_24_2015_28862750	464-1436	3_May_09_2015_37022703	95-1135	85	82.51	82.93	1.471	1.845	1.379	4.311	1.767
1_January_24_2015_28862750	464-1436	3_May_09_2015_37607546	868-1912	85	80.68	82.93	1.373	1.871	1.694	4.245	1.803
1_January_24_2015_28862750	464-1436	3_May_09_2015_37877953	1475-2512	85	82.93	100	1.413	1.943	1.614	4.163	1.838
1_January_24_2015_28862750	464-1436	3_May_09_2015_37986156	1677-2704	85	82.24	82.93	1.463	1.853	1.511	3.879	1.917
1_January_24_2015_28862750	464-1436	3_May_09_2015_38458890	2898-3926	85	79.73	69.44	1.51	1.937	1.875	4.253	1.977
1_January_24_2015_28862750	464-1436	3_May_09_2015_39812203	2943-4004	84	81.1	71.42	1.429	1.917	1.839	4.257	1.893
1_January_24_2015_28862750	464-1436	3_May_09_2015_39941578	960-1980	82	79.36	100	1.402	1.927	2.183	4.08	1.865
1_January_24_2015_28862750	464-1436	3_May_09_2015_40381531	1631-2635	85	83.31	82.93	1.438	1.766	1.623	3.949	1.785
1_January_24_2015_28862750	464-1436	3_May_09_2015_40520531	3088-4109	82	83.04	100	1.5	1.709	1.692	4.016	1.902
1_January_24_2015_28862750	464-1436	3_May_09_2015_42715562	1173-2197	77	83.01	91.46	1.49	1.924	1.888	4.306	1.978
1_January_24_2015_28862750	464-1436	3_May_09_2015_42753421	1463-2493	82	82.98	100	1.496	1.718	1.692	4.006	1.933
1_January_24_2015_28862750	464-1436	3_May_09_2015_42806234	1973-2982	77	82.95	91.46	1.489	1.927	1.888	4.3	1.994
1_January_24_2015_28862750	464-1436	3_May_09_2015_42811781	1564-2551	85	81.49	82.93	1.42	1.839	1.837	3.927	1.864
1_January_24_2015_29393296	882-1869	3_May_09_2015_32721406	2498-3519	75	82.21	73.19	1.659	2.017	1.741	4.008	2.088
1_January_24_2015_29393296	882-1869	3_May_09_2015_33128437	2387-3390	78	83.44	88.65	1.632	2.111	2.061	4.087	2.127
1_January_24_2015_29393296	882-1869	3_May_09_2015_33193078	2971-3976	73	81.81	90.33	1.658	1.96	1.895	3.926	2.079
1_January_24_2015_29393296	882-1869	3_May_09_2015_33397750	2101-3111	74	82.57	100	1.63	2.083	1.526	4.364	2.134
1_January_24_2015_29393296	882-1869	3_May_09_2015_33583937	1871-2888	73	83.89	100	1.42	1.827	1.808	3.994	2.032
1_January_24_2015_29393296	882-1869	3_May_09_2015_33778640	1436-2447	76	79.91	75.27	1.448	1.981	1.867	4.329	2.118
1_January_24_2015_29393296	882-1869	3_May_09_2015_34001312	763-1795	79	83.07	100	1.628	2.018	1.734	4.168	2.047
1_January_24_2015_29393296	882-1869	3_May_09_2015_37022703	95-1135	78	81.56	100	1.537	1.884	1.439	4.235	1.885
1_January_24_2015_29393296	882-1869	3_May_09_2015_37607546	868-1912	72	83.54	100	1.445	1.906	1.763	4.162	1.904
1_January_24_2015_29393296	882-1869	3_May_09_2015_37877953	1475-2512	77	81.09	88.19	1.484	1.984	1.675	4.08	1.943
1_January_24_2015_29393296	882-1869	3_May_09_2015_37986156	1677-2704	81	82.65	100	1.531	1.888	1.572	3.814	2.002
1_January_24_2015_29393296	882-1869	3_May_09_2015_38458890	2898-3926	73	83.78	100	1.572	1.977	1.96	4.173	2.083
1_January_24_2015_29393296	882-1869	3_May_09_2015_39812203	2943-4004	79	80.24	76.19	1.499	1.96	1.916	4.173	2.023
1_January_24_2015_29393296	882-1869	3_May_09_2015_39941578	960-1980	71	82.56	88.19	1.464	1.971	2.266	4.003	1.98
1_January_24_2015_29393296	882-1869	3_May_09_2015_40381531	1631-2635	75	83.65	100	1.507	1.806	1.688	3.875	1.901
1_January_24_2015_29393296	882-1869	3_May_09_2015_40520531	3088-4109	75	81.09	100	1.563	1.757	1.762	3.948	2.016
1_January_24_2015_29393296	882-1869	3_May_09_2015_42715562	1173-2197	72	82.03	100	1.554	1.968	1.966	4.226	2.091
1_January_24_2015_29393296	882-1869	3_May_09_2015_42753421	1463-2493	76	80.37	70	1.689	1.958	1.641	4.068	2.068
1_January_24_2015_29393296	882-1869	3_May_09_2015_42806234	1973-2982	83	79.32	64.8	1.568	1.891	1.581	3.699	2.03
1_January_24_2015_29393296	882-1869	3_May_09_2015_42811781	1564-2551	75	82.55	100	1.485	1.877	1.915	3.863	1.956
1_January_24_2015_30361203	1463-2468	3_May_09_2015_32721406	2498-3519	84	83.44	100	1.482	1.938	1.64	4.097	2.031
1_January_24_2015_30361203	1463-2468	3_May_09_2015_33128437	2387-3390	79	80.72	100	1.452	2.023	1.914	4.203	2.046
1_January_24_2015_30361203	1463-2468	3_May_09_2015_33193078	2971-3976	85	83.17	100	1.474	1.873	1.775	4.031	1.993
1_January_24_2015_30361203	1463-2468	3_May_09_2015_33397750	2101-3111	85	77.54	68.57	1.476	1.978	1.651	4.563	2.062
1_January_24_2015_30361203	1463-2468	3_May_09_2015_33583937	1871-2888	85	86.41	100	1.221	1.75	1.715	4.068	1.992
1_January_24_2015_30361203	1463-2468	3_May_09_2015_33778640	1436-2447	85	81.01	100	1.245	1.895	1.743	4.448	2.035
1_January_24_2015_30361203	1463-2468	3_May_09_2015_34001312	763-1795	85	81	100	1.439	1.946	1.656	4.281	2.012
1_January_24_2015_30361203	1463-2468	3_May_09_2015_37022703	95-1135	85	85.85	69.36	1.337	1.812	1.368	4.324	1.828
1_January_24_2015_30361203	1463-2468	3_May_09_2015_37607546	868-1912	85	82.07	68.97	1.237	1.842	1.58	4.273	1.861
1_January_24_2015_30361203	1463-2468	3_May_09_2015_37877953	1475-2512	85	82.93	100	1.276	1.905	1.6	4.186	1.897
1_January_24_2015_30361203	1463-2468	3_May_09_2015_37986156	1677-2704	85	83.6	43.47	1.333	1.815	1.488	3.896	1.953
1_January_24_2015_30361203	1463-2468	3_May_09_2015_38458890	2898-3926	84	81.93	69.36	1.387	1.896	1.798	4.298	1.988
1_January_24_2015_30361203	1463-2468	3_May_09_2015_39812203	2943-4004	85	81.96	68.97	1.298	1.878	1.782	4.287	1.928
1_January_24_2015_30361203	1463-2468	3_May_09_2015_39941578	960-1980	85	79.04	100	1.275	1.896	2.097	4.088	1.948
1_January_24_2015_30361203	1463-2468	3_May_09_2015_40381531	1631-2635	85	84.25	100	1.302	1.729	1.594	3.969	1.828
1_January_24_2015_30361203	1463-2468	3_May_09_2015_40520531	3088-4109	85	80.45	100	1.373	1.672	1.646	4.031	1.945
1_January_24_2015_30361203	1463-2468	3_May_09_2015_42715562	1173-2197	85	83.09	68.97	1.363	1.888	1.812	4.325	2.031
1_January_24_2015_30361203	1463-2468	3_May_09_2015_42753421	1463-2493	85	83.04	69.36	1.513	1.871	1.511	4.187	1.976
1_January_24_2015_30361203	1463-2468	3_May_09_2015_42806234	1973-2982	85	86.4	100	1.381	1.813	1.518	3.781	1.983
1_January_24_2015_30361203	1463-2468	3_May_09_2015_42811781	1564-2551	84	81.6	100	1.294	1.797	1.753	3.951	1.891
1_January_24_2015_30432968	2557-3550	3_May_09_2015_32721406	2498-3519	83	86	100	1.731	1.94	1.527	4.332	2.162
1_January_24_2015_30432968	2557-3550	3_May_09_2015_33128437	2387-3390	84	84.58	100	1.707	2.018	1.831	4.351	2.2
1_January_24_2015_30432968	2557-3550	3_May_09_2015_33193078	2971-3976	82	83.74	100	1.729	1.866	1.675	4.242	2.129
1_January_24_2015_30432968	2557-3550	3_May_09_2015_33397750	2101-3111	85	85.69	100	1.702	1.98	1.328	4.573	2.207
1_January_24_2015_30432968	2557-3550	3_May_09_2015_33583937	1871-2888	75	84.45	74.09	1.494	1.75	1.598	4.362	2.093
1_January_24_2015_30432968	2557-3550	3_May_09_2015_33778640	1436-2447	83	83.88	100	1.522	1.892	1.648	4.572	2.167
1_January_24_2015_30432968	2557-3550	3_May_09_2015_34001312	763-1795	85	85.04	100	1.716	1.942	1.543	4.463	2.151
1_January_24_2015_30432968	2557-3550	3_May_09_2015_37022703	95-1135	79	85.75	100	1.611	1.826	1.236	4.561	1.948
1_January_24_2015_30432968	2557-3550	3_May_09_2015_37607546	868-1912	82	85.45	100	1.515	1.855	1.546	4.405	1.992
1_January_24_2015_30432968	2557-3550	3_May_09_2015_37877953	1475-2512	80	85.1	100	1.556	1.905	1.47	4.342	2.012
1_January_24_2015_30432968	2557-3550	3_May_09_2015_37986156	1677-2704	83	84.8	100	1.6	1.828	1.367	4.15	2.097
1_January_24_2015_30432968	2557-3550	3_May_09_2015_38458890	2898-3926	79	86.1	100	1.646	1.881	1.726	4.438	2.142
1_January_24_2015_30432968	2557-3550	3_May_09_2015_39812203	2943-4004	81	82.94	100	1.57	1.886	1.693	4.425	2.075
1_January_24_2015_30432968	2557-3550	3_May_09_2015_39941578	960-1980	77	81.75	100	1.536	1.885	2.031	4.311	2.053
1_January_24_2015_30432968	2557-3550	3_May_09_2015_40381531	1631-2635	75	84.62	100	1.579	1.729	1.478	4.178	1.968
1_January_24_2015_30432968	2557-3550	3_May_09_2015_40520531	3088-4109	77	84.34	100	1.637	1.663	1.545	4.296	2.082
1_January_24_2015_30432968	2557-3550	3_May_09_2015_42715562	1173-2197	79	85.59	100	1.625	1.89	1.732	4.514	2.169
1_January_24_2015_30432968	2557-3550	3_May_09_2015_42753421	1463-2493	79	86.29	100	1.76	1.866	1.415	4.339	2.109
1_January_24_2015_30432968	2557-3550	3_May_09_2015_42806234	1973-2982	83	85.56	100	1.646	1.797	1.381	4.034	2.086
1_January_24_2015_30432968	2557-3550	3_May_09_2015_42811781	1564-2551	82	82.25	100	1.555	1.797	1.677	4.198	2.034
1_January_24_2015_30481859	3876-4878	3_May_09_2015_32721406	2498-3519	80	85.46	100	1.561	2.002	1.687	4.278	2.161
1_January_24_2015_30481859	3876-4878	3_May_09_2015_33128437	2387-3390	80	83.77	69.87	1.536	2.076	1.973	4.325	2.202
1_January_24_2015_30481859	3876-4878	3_May_09_2015_33193078	2971-3976	85	84.07	100	1.557	1.925	1.828	4.193	2.142
1_January_24_2015_30481859	3876-4878	3_May_09_2015_33397750	2101-3111	86	84.01	100	1.551	2.019	1.694	4.617	2.19
1_January_24_2015_30481859	3876-4878	3_May_09_2015_33583937	1871-2888	84	86.71	100	1.325	1.814	1.762	4.287	2.085
1_January_24_2015_30481859	3876-4878	3_May_09_2015_33778640	1436-2447	85	84.53	69.87	1.345	1.953	1.794	4.551	2.175
1_January_24_2015_30481859	3876-4878	3_May_09_2015_34001312	763-1795	85	84.41	100	1.528	1.987	1.695	4.381	2.129
1_January_24_2015_30481859	3876-4878	3_May_09_2015_37022703	95-1135	85	84.72	100	1.439	1.893	1.408	4.507	1.949
1_January_24_2015_30481859	3876-4878	3_May_09_2015_37607546	868-1912	85	84.93	100	1.342	1.921	1.701	4.387	1.983
1_January_24_2015_30481859	3876-4878	3_May_09_2015_37877953	1475-2512	85	86.54	100	1.382	1.967	1.639	4.316	2.018
1_January_24_2015_30481859	3876-4878	3_May_09_2015_37986156	1677-2704	85	84.43	70.26	1.429	1.896	1.534	4.085	2.098
1_January_24_2015_30481859	3876-4878	3_May_09_2015_38458890	2898-3926	85	85.96	100	1.475	1.94	1.863	4.41	2.148
1_January_24_2015_30481859	3876-4878	3_May_09_2015_39812203	2943-4004	71	85.04	100	1.395	1.949	1.843	4.402	2.074
1_January_24_2015_30481859	3876-4878	3_May_09_2015_39941578	960-1980	85	82.2	100	1.365	1.942	2.159	4.26	2.056
1_January_24_2015_30481859	3876-4878	3_May_09_2015_40381531	1631-2635	84	85.48	100	1.408	1.796	1.638	4.135	1.95
1_January_24_2015_30481859	3876-4878	3_May_09_2015_40520531	3088-4109	85	84	100	1.462	1.722	1.696	4.225	2.099
1_January_24_2015_30481859	3876-4878	3_May_09_2015_42715562	1173-2197	85	84.32	69.48	1.453	1.952	1.872	4.472	2.182
1_January_24_2015_30481859	3876-4878	3_May_09_2015_42753421	1463-2493	85	85.97	70.26	1.588	1.923	1.566	4.308	2.127
1_January_24_2015_30481859	3876-4878	3_May_09_2015_42806234	1973-2982	70	86.65	100	1.474	1.859	1.558	3.969	2.115
1_January_24_2015_30481859	3876-4878	3_May_09_2015_42811781	1564-2551	84	84.57	100	1.388	1.856	1.812	4.145	2.014
1_January_24_2015_30628093	290-1281	3_May_09_2015_32721406	2498-3519	80	86.09	100	1.594	2.006	1.76	4.093	2.152
1_January_24_2015_30628093	290-1281	3_May_09_2015_33128437	2387-3390	83	83.54	100	1.569	2.084	2.034	4.154	2.18
1_January_24_2015_30628093	290-1281	3_May_09_2015_33193078	2971-3976	85	84.7	100	1.59	1.932	1.895	4.015	2.107
1_January_24_2015_30628093	290-1281	3_May_09_2015_33397750	2101-3111	85	81.83	100	1.565	2.049	1.592	4.408	2.189
1_January_24_2015_30628093	290-1281	3_May_09_2015_33583937	1871-2888	79	82.98	88.99	1.474	1.954	1.89	4.059	2.13
1_January_24_2015_30628093	290-1281	3_May_09_2015_33778640	1436-2447	85	85.03	100	1.375	1.956	1.868	4.391	2.161
1_January_24_2015_30628093	290-1281	3_May_09_2015_34001312	763-1795	85	83.64	100	1.557	1.999	1.774	4.216	2.122
1_January_24_2015_30628093	290-1281	3_May_09_2015_37022703	95-1135	85	83.8	100	1.459	1.886	1.489	4.321	1.955
1_January_24_2015_30628093	290-1281	3_May_09_2015_37607546	868-1912	85	84.1	100	1.37	1.922	1.702	4.224	1.986
1_January_24_2015_30628093	290-1281	3_May_09_2015_37877953	1475-2512	85	84.93	100	1.405	1.968	1.717	4.147	1.988
1_January_24_2015_30628093	290-1281	3_May_09_2015_37986156	1677-2704	85	84.46	100	1.456	1.889	1.611	3.903	2.074
1_January_24_2015_30628093	290-1281	3_May_09_2015_38458890	2898-3926	85	85.54	100	1.504	1.955	1.919	4.233	2.135
1_January_24_2015_30628093	290-1281	3_May_09_2015_39812203	2943-4004	85	84.18	100	1.425	1.949	1.914	4.233	2.061
1_January_24_2015_30628093	290-1281	3_May_09_2015_39941578	960-1980	85	82.21	100	1.395	1.951	2.216	4.08	2.049
1_January_24_2015_30628093	290-1281	3_May_09_2015_40381531	1631-2635	84	85.72	100	1.432	1.793	1.715	3.958	1.93
1_January_24_2015_30628093	290-1281	3_May_09_2015_40520531	3088-4109	84	82.89	69.94	1.492	1.729	1.764	4.043	2.061
1_January_24_2015_30628093	290-1281	3_May_09_2015_42715562	1173-2197	85	85.31	100	1.484	1.95	1.93	4.302	2.136
1_January_24_2015_30628093	290-1281	3_May_09_2015_42753421	1463-2493	85	85.54	100	1.629	1.931	1.632	4.138	2.103
1_January_24_2015_30628093	290-1281	3_May_09_2015_42806234	1973-2982	85	86.56	100	1.505	1.865	1.639	3.788	2.087
1_January_24_2015_30628093	290-1281	3_May_09_2015_42811781	1564-2551	84	83.53	100	1.414	1.861	1.869	3.955	2.007
1_January_24_2015_31125343	1644-2639	3_May_09_2015_32721406	2498-3519	84	84.43	100	1.436	2.014	1.674	3.94	2.055
1_January_24_2015_31125343	1644-2639	3_May_09_2015_33128437	2387-3390	81	82.38	100	1.401	2.112	1.894	3.993	2.085
1_January_24_2015_31125343	1644-2639	3_May_09_2015_33193078	2971-3976	84	83.63	100	1.427	1.961	1.791	3.852	2.052
1_January_24_2015_31125343	1644-2639	3_May_09_2015_33397750	2101-3111	84	80.28	100	1.407	2.088	1.556	4.243	2.079
1_January_24_2015_31125343	1644-2639	3_May_09_2015_33583937	1871-2888	82	86.16	100	1.165	1.823	1.76	3.95	1.995
1_January_24_2015_31125343	1644-2639	3_May_09_2015_33778640	1436-2447	84	83.72	100	1.183	1.984	1.764	4.213	2.08
1_January_24_2015_31125343	1644-2639	3_May_09_2015_34001312	763-1795	85	83.64	100	1.387	2.029	1.71	4.048	2.036
1_January_24_2015_31125343	1644-2639	3_May_09_2015_37022703	95-1135	83	84.2	100	1.275	1.88	1.441	4.167	1.863
1_January_24_2015_31125343	1644-2639	3_May_09_2015_37607546	868-1912	85	86.34	100	1.167	1.896	1.673	4.052	1.888
1_January_24_2015_31125343	1644-2639	3_May_09_2015_37877953	1475-2512	85	85.66	100	1.208	1.981	1.658	3.982	1.906
1_January_24_2015_31125343	1644-2639	3_May_09_2015_37986156	1677-2704	85	85.52	100	1.135	1.913	1.485	3.631	1.993
1_January_24_2015_31125343	1644-2639	3_May_09_2015_38458890	2898-3926	84	85.33	100	1.326	1.985	1.769	4.072	2.053
1_January_24_2015_31125343	1644-2639	3_May_09_2015_39812203	2943-4004	85	84.12	100	1.241	1.95	1.8	4.072	1.955
1_January_24_2015_31125343	1644-2639	3_May_09_2015_39941578	960-1980	84	83.39	100	1.221	1.978	2.048	3.924	1.963
1_January_24_2015_31125343	1644-2639	3_May_09_2015_40381531	1631-2635	83	83.88	100	1.239	1.805	1.638	3.806	1.868
1_January_24_2015_31125343	1644-2639	3_May_09_2015_40520531	3088-4109	83	81.81	100	1.32	1.756	1.664	3.897	1.961
1_January_24_2015_31125343	1644-2639	3_May_09_2015_42715562	1173-2197	84	84.89	100	1.308	1.967	1.781	4.145	2.053
1_January_24_2015_31125343	1644-2639	3_May_09_2015_42753421	1463-2493	84	85.89	100	1.465	1.957	1.515	3.973	2.023
1_January_24_2015_31125343	1644-2639	3_May_09_2015_42806234	1973-2982	85	84.66	100	1.334	1.89	1.592	3.638	2.004
1_January_24_2015_31125343	1644-2639	3_May_09_2015_42811781	1564-2551	83	83.75	100	1.234	1.875	1.711	3.798	1.936
1_January_24_2015_31228906	716-1718	3_May_09_2015_32721406	2498-3519	85	84.49	100	1.434	2.023	1.674	3.936	2.081
1_January_24_2015_31228906	716-1718	3_May_09_2015_33128437	2387-3390	81	82.59	100	1.4	2.117	1.893	3.992	2.094
1_January_24_2015_31228906	716-1718	3_May_09_2015_33193078	2971-3976	84	83.63	100	1.426	1.959	1.79	3.854	2.047
1_January_24_2015_31228906	716-1718	3_May_09_2015_33397750	2101-3111	84	81.87	100	1.426	2.059	1.694	4.294	2.058
1_January_24_2015_31228906	716-1718	3_May_09_2015_33583937	1871-2888	82	86.16	100	1.165	1.823	1.76	3.95	1.995
1_January_24_2015_31228906	716-1718	3_May_09_2015_33778640	1436-2447	84	83.76	100	1.188	1.981	1.766	4.22	2.083
1_January_24_2015_31228906	716-1718	3_May_09_2015_34001312	763-1795	85	83.63	100	1.387	2.033	1.714	4.043	2.041
1_January_24_2015_31228906	716-1718	3_May_09_2015_37022703	95-1135	84	84.68	100	1.201	1.936	1.48	4.112	1.773
1_January_24_2015_31228906	716-1718	3_May_09_2015_37607546	868-1912	85	86.15	100	1.163	1.897	1.674	4.053	1.883
1_January_24_2015_31228906	716-1718	3_May_09_2015_37877953	1475-2512	85	85.79	100	1.212	1.983	1.662	3.982	1.927
1_January_24_2015_31228906	716-1718	3_May_09_2015_37986156	1677-2704	85	85.34	100	1.273	1.889	1.547	3.746	2.006
1_January_24_2015_31228906	716-1718	3_May_09_2015_38458890	2898-3926	85	85.42	88.84	1.29	2.039	1.825	4.07	2.014
1_January_24_2015_31228906	716-1718	3_May_09_2015_39812203	2943-4004	85	84.16	100	1.239	1.952	1.802	4.067	1.965
1_January_24_2015_31228906	716-1718	3_May_09_2015_39941578	960-1980	84	83.46	100	1.218	1.978	2.048	3.924	1.965
1_January_24_2015_31228906	716-1718	3_May_09_2015_40381531	1631-2635	82	83.65	100	1.237	1.806	1.639	3.797	1.856
1_January_24_2015_31228906	716-1718	3_May_09_2015_40520531	3088-4109	84	81.97	100	1.314	1.765	1.664	3.89	1.994
1_January_24_2015_31228906	716-1718	3_May_09_2015_42715562	1173-2197	85	84.89	100	1.306	1.967	1.781	4.142	2.062
1_January_24_2015_31228906	716-1718	3_May_09_2015_42753421	1463-2493	85	85.92	100	1.467	1.961	1.515	3.971	2.034
1_January_24_2015_31228906	716-1718	3_May_09_2015_42806234	1973-2982	84	85.1	100	1.324	1.893	1.591	3.639	1.992
1_January_24_2015_31228906	716-1718	3_May_09_2015_42811781	1564-2551	82	83.93	100	1.238	1.877	1.709	3.799	1.912
1_January_24_2015_31819593	3932-4943	3_May_09_2015_32721406	2498-3519	85	83.41	100	1.408	2.057	1.692	4.253	2.027
1_January_24_2015_31819593	3932-4943	3_May_09_2015_33128437	2387-3390	80	81.83	100	1.375	2.155	1.92	4.335	2.045
1_January_24_2015_31819593	3932-4943	3_May_09_2015_33193078	2971-3976	85	82.35	100	1.398	2.003	1.811	4.175	2.011
1_January_24_2015_31819593	3932-4943	3_May_09_2015_33397750	2101-3111	82	80.94	100	1.378	2.137	1.567	4.604	2.053
1_January_24_2015_31819593	3932-4943	3_May_09_2015_33583937	1871-2888	82	83.3	100	1.283	2.03	1.801	4.207	2.021
1_January_24_2015_31819593	3932-4943	3_May_09_2015_33778640	1436-2447	84	82.42	100	1.163	2.02	1.784	4.569	2.035
1_January_24_2015_31819593	3932-4943	3_May_09_2015_34001312	763-1795	85	81.78	68.25	1.361	2.069	1.723	4.403	1.989
1_January_24_2015_31819593	3932-4943	3_May_09_2015_37022703	95-1135	85	83.97	100	1.249	1.909	1.451	4.479	1.832
1_January_24_2015_31819593	3932-4943	3_May_09_2015_37607546	868-1912	85	85.14	100	1.146	1.931	1.692	4.396	1.856
1_January_24_2015_31819593	3932-4943	3_May_09_2015_37877953	1475-2512	85	83.89	100	1.186	2.022	1.672	4.322	1.874
1_January_24_2015_31819593	3932-4943	3_May_09_2015_37986156	1677-2704	85	85.58	100	1.251	1.92	1.559	4.058	1.955
1_January_24_2015_31819593	3932-4943	3_May_09_2015_38458890	2898-3926	84	83.45	100	1.304	2.02	1.794	4.423	1.986
1_January_24_2015_31819593	3932-4943	3_May_09_2015_39812203	2943-4004	85	84.8	100	1.217	1.986	1.815	4.421	1.909
1_January_24_2015_31819593	3932-4943	3_May_09_2015_39941578	960-1980	84	81.69	100	1.197	2.029	2.078	4.236	1.955
1_January_24_2015_31819593	3932-4943	3_May_09_2015_40381531	1631-2635	82	82.34	100	1.214	1.846	1.656	4.118	1.827
1_January_24_2015_31819593	3932-4943	3_May_09_2015_40520531	3088-4109	83	80.99	100	1.292	1.803	1.684	4.197	1.942
1_January_24_2015_31819593	3932-4943	3_May_09_2015_42715562	1173-2197	85	84.33	100	1.281	2.008	1.808	4.467	2.032
1_January_24_2015_31819593	3932-4943	3_May_09_2015_42753421	1463-2493	85	84.37	100	1.444	2.002	1.536	4.312	1.994
1_January_24_2015_31819593	3932-4943	3_May_09_2015_42806234	1973-2982	84	84.44	100	1.305	1.933	1.601	3.945	1.954
1_January_24_2015_31819593	3932-4943	3_May_09_2015_42811781	1564-2551	83	81.97	100	1.212	1.918	1.743	4.109	1.897
1_January_24_2015_31824687	966-1993	3_May_09_2015_32721406	2498-3519	84	82.45	69.81	1.485	2.03	1.627	3.996	2.044
1_January_24_2015_31824687	966-1993	3_May_09_2015_33128437	2387-3390	81	79.47	100	1.451	2.127	1.91	4.047	2.074
1_January_24_2015_31824687	966-1993	3_May_09_2015_33193078	2971-3976	80	83.15	100	1.477	1.969	1.766	3.91	2.029
1_January_24_2015_31824687	966-1993	3_May_09_2015_33397750	2101-3111	85	82.22	100	1.452	2.111	1.452	4.288	2.095
1_January_24_2015_31824687	966-1993	3_May_09_2015_33583937	1871-2888	81	85.42	100	1.219	1.84	1.702	4.003	1.983
1_January_24_2015_31824687	966-1993	3_May_09_2015_33778640	1436-2447	84	82.87	100	1.241	1.992	1.738	4.273	2.056
1_January_24_2015_31824687	966-1993	3_May_09_2015_34001312	763-1795	85	81.53	68.29	1.438	2.045	1.638	4.101	2.027
1_January_24_2015_31824687	966-1993	3_May_09_2015_37022703	95-1135	85	84.01	100	1.328	1.894	1.352	4.218	1.857
1_January_24_2015_31824687	966-1993	3_May_09_2015_37607546	868-1912	84	83.82	68.67	1.225	1.924	1.569	4.11	1.885
1_January_24_2015_31824687	966-1993	3_May_09_2015_37877953	1475-2512	84	83.4	100	1.267	1.994	1.578	4.038	1.882
1_January_24_2015_31824687	966-1993	3_May_09_2015_37986156	1677-2704	84	84.9	100	1.329	1.9	1.473	3.802	1.971
1_January_24_2015_31824687	966-1993	3_May_09_2015_38458890	2898-3926	83	81.92	100	1.381	1.989	1.798	4.137	2.01
1_January_24_2015_31824687	966-1993	3_May_09_2015_39812203	2943-4004	84	83.06	69.81	1.294	1.964	1.778	4.123	1.941
1_January_24_2015_31824687	966-1993	3_May_09_2015_39941578	960-1980	84	79.24	100	1.272	1.991	2.094	3.977	1.95
1_January_24_2015_31824687	966-1993	3_May_09_2015_40381531	1631-2635	81	81.87	100	1.295	1.819	1.58	3.855	1.833
1_January_24_2015_31824687	966-1993	3_May_09_2015_40520531	3088-4109	82	83.01	100	1.371	1.775	1.64	3.947	1.969
1_January_24_2015_31824687	966-1993	3_May_09_2015_42715562	1173-2197	85	83.85	100	1.36	1.981	1.806	4.194	2.048
1_January_24_2015_31824687	966-1993	3_May_09_2015_42753421	1463-2493	84	82.85	69.43	1.514	1.97	1.503	4.027	2.005
1_January_24_2015_31824687	966-1993	3_May_09_2015_42806234	1973-2982	84	84.56	100	1.379	1.903	1.494	3.693	1.965
1_January_24_2015_31824687	966-1993	3_May_09_2015_42811781	1564-2551	82	81.2	100	1.288	1.891	1.75	3.852	1.923
				82.54

## Sheet: yellow 30 vs black 45
Tutor-black 45	duration-black 33	yellow 30	duration-yellow 29	%Similarity	Accuracy	%Sequential	Pitch diff	FM diff	Entropy diff	Goodness diff	AM diff
3_January_24_2015_32765078	581-1310	4_May_09_2015_32636375	3362-3949	56	73.01	62.2	2.222	1.853	2.106	3.795	1.784
3_January_24_2015_32765078	581-1310	4_May_09_2015_32842171	3002-3598	59	64.75	31.66	2.187	1.852	2.169	3.802	1.8
3_January_24_2015_32765078	581-1310	4_May_09_2015_32875734	1883-2468	58	67.34	86.11	2.123	1.723	2.378	3.925	1.796
3_January_24_2015_32765078	581-1310	4_May_09_2015_32957875	2718-3328	57	72.1	51.94	2.368	1.825	2.108	3.838	1.77
3_January_24_2015_32765078	581-1310	4_May_09_2015_33214500	1328-1928	57	65.48	50.27	2.01	1.893	2.08	3.705	1.688
3_January_24_2015_32765078	581-1310	4_May_09_2015_33318671	307-883	42	68.93	53.61	1.837	1.823	2.149	3.823	1.583
3_January_24_2015_32765078	581-1310	4_May_09_2015_33387765	2083-2668	45	69.91	47.22	2.524	1.644	2.047	3.693	1.718
3_January_24_2015_32765078	581-1310	4_May_09_2015_33476546	77-677	53	71.24	68.43	2.523	1.772	2.146	3.788	1.732
3_January_24_2015_32765078	581-1310	4_May_09_2015_33498296	885-1469	51	68.04	67.77	2.334	1.753	2.207	3.482	1.837
3_January_24_2015_32765078	581-1310	4_May_09_2015_33554031	2118-2724	46	71.77	67.61	3.026	1.595	1.869	3.736	1.81
3_January_24_2015_32765078	581-1310	4_May_09_2015_33666187	292-869	46	65.43	58.71	2.329	1.648	1.881	3.892	1.72
3_January_24_2015_32765078	581-1310	4_May_09_2015_33742546	544-1125	46	69.78	51.94	2.51	1.657	1.922	3.814	1.802
3_January_24_2015_32765078	581-1310	4_May_09_2015_33821640	3513-4076	47	68.76	56.8	2.359	1.531	1.877	3.795	1.714
3_January_24_2015_32765078	581-1310	4_May_09_2015_34094625	402-970	61	66.05	61.31	2.153	1.663	1.891	3.901	1.788
3_January_24_2015_32765078	581-1310	4_May_09_2015_34191953	2655-3233	43	65.47	55	2.176	1.771	2.406	3.564	1.762
3_January_24_2015_32765078	581-1310	4_May_09_2015_34318687	622-1207	52	67.45	40.55	2.12	1.766	2.269	3.87	1.754
3_January_24_2015_32765078	581-1310	4_May_09_2015_34448203	1300-1889	62	70.02	36.38	2.101	1.779	2.056	3.879	1.764
3_January_24_2015_32765078	581-1310	4_May_09_2015_34533359	969-1539	58	69.21	63.88	2.386	1.758	2.424	3.624	1.76
3_January_24_2015_32765078	581-1310	4_May_09_2015_35480343	476-1044	57	66.79	51.94	2.162	1.683	1.987	3.643	1.536
3_January_24_2015_32765078	581-1310	4_May_09_2015_35848718	3021-3581	57	68.41	35.07	2.526	1.599	2.154	3.893	1.805
3_January_24_2015_32759953	3209-3925	4_May_09_2015_32636375	3362-3949	72	69.65	32.91	2.376	1.619	2.017	3.438	1.592
3_January_24_2015_32759953	3209-3925	4_May_09_2015_32842171	3002-3598	70	72.32	46.51	2.318	1.593	2.077	3.374	1.582
3_January_24_2015_32759953	3209-3925	4_May_09_2015_32875734	1883-2468	70	73.16	83.07	2.242	1.472	2.277	3.507	1.631
3_January_24_2015_32759953	3209-3925	4_May_09_2015_32957875	2718-3328	73	74.88	100	2.497	1.576	2.018	3.423	1.604
3_January_24_2015_32759953	3209-3925	4_May_09_2015_33214500	1328-1928	60	74.06	53	2.115	1.593	1.984	3.275	1.522
3_January_24_2015_32759953	3209-3925	4_May_09_2015_33318671	307-883	60	72.66	58.94	1.948	1.521	2.071	3.319	1.414
3_January_24_2015_32759953	3209-3925	4_May_09_2015_33387765	2083-2668	60	67.35	35.42	2.584	1.41	1.965	3.182	1.564
3_January_24_2015_32759953	3209-3925	4_May_09_2015_33476546	77-677	66	71.95	91.4	2.544	1.502	2.06	3.385	1.555
3_January_24_2015_32759953	3209-3925	4_May_09_2015_33498296	885-1469	67	67.27	39.52	2.396	1.519	2.128	3.009	1.669
3_January_24_2015_32759953	3209-3925	4_May_09_2015_33554031	2118-2724	56	70.7	85.02	2.329	1.221	1.974	3.141	1.604
3_January_24_2015_32759953	3209-3925	4_May_09_2015_33666187	292-869	63	71.32	86.96	2.271	1.292	1.836	3.346	1.579
3_January_24_2015_32759953	3209-3925	4_May_09_2015_33742546	544-1125	65	67.48	65.14	2.494	1.428	1.854	3.327	1.62
3_January_24_2015_32759953	3209-3925	4_May_09_2015_33821640	3513-4076	59	69.36	85.85	2.313	1.426	2.297	3.455	1.584
3_January_24_2015_32759953	3209-3925	4_May_09_2015_34094625	402-970	73	70.86	90.29	2.144	1.399	2.229	3.283	1.615
3_January_24_2015_32759953	3209-3925	4_May_09_2015_34191953	2655-3233	66	75.16	81.13	2.249	1.521	2.133	3.328	1.632
3_January_24_2015_32759953	3209-3925	4_May_09_2015_34318687	622-1207	58	76.11	74.15	2.205	1.466	2.083	3.112	1.559
3_January_24_2015_32759953	3209-3925	4_May_09_2015_34448203	1300-1889	68	73.36	63.97	2.268	1.465	2.037	3.245	1.564
3_January_24_2015_32759953	3209-3925	4_May_09_2015_34533359	969-1539	73	72.79	87.23	2.432	1.505	2.31	3.202	1.613
3_January_24_2015_32759953	3209-3925	4_May_09_2015_35480343	476-1044	66	72.51	50.06	2.209	1.443	1.899	3.192	1.462
3_January_24_2015_32759953	3209-3925	4_May_09_2015_35848718	3021-3581	68	70.52	81.69	2.518	1.342	2.088	3.463	1.6
3_January_24_2015_32028546	3580-4300	4_May_09_2015_32636375	3362-3949	70	67.06	83.75	1.655	1.716	1.924	3.522	1.665
3_January_24_2015_32028546	3580-4300	4_May_09_2015_32842171	3002-3598	78	66.76	82.91	1.651	1.621	2.028	3.268	1.653
3_January_24_2015_32028546	3580-4300	4_May_09_2015_32875734	1883-2468	78	71.14	84.31	1.752	1.827	2.079	3.529	1.744
3_January_24_2015_32028546	3580-4300	4_May_09_2015_32957875	2718-3328	73	71.97	88.79	1.801	1.673	1.928	3.536	1.65
3_January_24_2015_32028546	3580-4300	4_May_09_2015_33214500	1328-1928	75	66.17	57.06	1.503	1.705	1.892	3.391	1.597
3_January_24_2015_32028546	3580-4300	4_May_09_2015_33318671	307-883	68	68.03	60.22	1.356	1.638	1.968	3.454	1.477
3_January_24_2015_32028546	3580-4300	4_May_09_2015_33387765	2083-2668	52	68.94	57.41	2.233	1.508	1.853	3.324	1.653
3_January_24_2015_32028546	3580-4300	4_May_09_2015_33476546	77-677	68	68.36	69.14	2.066	1.477	1.579	3.57	1.6
3_January_24_2015_32028546	3580-4300	4_May_09_2015_33498296	885-1469	74	66.71	67.5	1.752	1.614	2.021	3.329	1.636
3_January_24_2015_32028546	3580-4300	4_May_09_2015_33554031	2118-2724	46	64.15	64.42	1.755	1.32	1.865	3.305	1.682
3_January_24_2015_32028546	3580-4300	4_May_09_2015_33666187	292-869	60	70.15	32.21	2.105	1.391	1.729	3.516	1.659
3_January_24_2015_32028546	3580-4300	4_May_09_2015_33742546	544-1125	47	65.81	68.34	2.454	1.523	1.736	3.463	1.698
3_January_24_2015_32028546	3580-4300	4_May_09_2015_33821640	3513-4076	49	67.51	49.01	2.001	1.538	2.204	3.642	1.702
3_January_24_2015_32028546	3580-4300	4_May_09_2015_34094625	402-970	63	65.77	52.1	1.759	1.572	2.07	3.253	1.701
3_January_24_2015_32028546	3580-4300	4_May_09_2015_34191953	2655-3233	58	65.71	53.78	1.754	1.623	2.226	3.232	1.645
3_January_24_2015_32028546	3580-4300	4_May_09_2015_34318687	622-1207	61	68.94	85.15	1.516	1.567	1.975	3.246	1.632
3_January_24_2015_32028546	3580-4300	4_May_09_2015_34448203	1300-1889	58	72.1	39.49	1.782	1.567	1.926	3.398	1.656
3_January_24_2015_32028546	3580-4300	4_May_09_2015_34533359	969-1539	64	69.85	57.38	2.059	1.603	2.232	3.317	1.686
3_January_24_2015_32028546	3580-4300	4_May_09_2015_35480343	476-1044	59	71.34	41.45	1.658	1.551	1.785	3.324	1.539
3_January_24_2015_32028546	3580-4300	4_May_09_2015_35848718	3021-3581	42	68.02	77.03	2.442	1.44	1.969	3.579	1.684
3_January_24_2015_32023468	2722-3441	4_May_09_2015_32636375	3362-3949	65	71.84	86.41	1.278	1.92	2.047	3.687	1.646
3_January_24_2015_32023468	2722-3441	4_May_09_2015_32842171	3002-3598	68	72.11	53.26	1.266	1.925	2.113	3.668	1.648
3_January_24_2015_32023468	2722-3441	4_May_09_2015_32875734	1883-2468	65	73.93	88.58	1.161	2.045	2.206	3.708	1.707
3_January_24_2015_32023468	2722-3441	4_May_09_2015_32957875	2718-3328	71	72.28	85.86	1.201	1.896	2.041	3.722	1.656
3_January_24_2015_32023468	2722-3441	4_May_09_2015_33214500	1328-1928	69	71.71	85.86	1.203	1.961	2.002	3.6	1.589
3_January_24_2015_32023468	2722-3441	4_May_09_2015_33318671	307-883	63	72.25	54.61	1.137	1.903	2.094	3.686	1.46
3_January_24_2015_32023468	2722-3441	4_May_09_2015_33387765	2083-2668	55	69.73	42.86	1.27	1.718	1.986	3.559	1.624
3_January_24_2015_32023468	2722-3441	4_May_09_2015_33476546	77-677	65	74.11	86.95	1.287	1.707	1.706	3.774	1.592
3_January_24_2015_32023468	2722-3441	4_May_09_2015_33498296	885-1469	70	71.07	73.64	1.218	1.841	2.142	3.531	1.623
3_January_24_2015_32023468	2722-3441	4_May_09_2015_33554031	2118-2724	68	68.38	63.58	1.221	1.667	1.818	3.602	1.682
3_January_24_2015_32023468	2722-3441	4_May_09_2015_33666187	292-869	61	68.55	37.01	1.27	1.725	1.812	3.762	1.608
3_January_24_2015_32023468	2722-3441	4_May_09_2015_33742546	544-1125	59	70.37	78.38	1.274	1.73	1.873	3.682	1.677
3_January_24_2015_32023468	2722-3441	4_May_09_2015_33821640	3513-4076	57	69.81	78.8	1.242	1.606	1.814	3.673	1.598
3_January_24_2015_32023468	2722-3441	4_May_09_2015_34094625	402-970	57	72.06	85.86	1.171	1.778	2.162	3.465	1.74
3_January_24_2015_32023468	2722-3441	4_May_09_2015_34191953	2655-3233	60	71.64	84.51	1.202	1.815	2.15	3.711	1.697
3_January_24_2015_32023468	2722-3441	4_May_09_2015_34318687	622-1207	54	69.4	92.93	1.179	1.841	2.204	3.753	1.64
3_January_24_2015_32023468	2722-3441	4_May_09_2015_34448203	1300-1889	67	71.7	77.44	1.27	1.809	2.057	3.612	1.631
3_January_24_2015_32023468	2722-3441	4_May_09_2015_34533359	969-1539	71	74.15	92.66	1.191	1.837	2.351	3.506	1.667
3_January_24_2015_32023468	2722-3441	4_May_09_2015_35480343	476-1044	60	67.82	84.78	1.194	1.753	1.917	3.512	1.412
3_January_24_2015_32023468	2722-3441	4_May_09_2015_35848718	3021-3581	54	70.26	47.82	1.315	1.667	2.105	3.773	1.657
3_January_24_2015_31930890	1560-2282	4_May_09_2015_32636375	3362-3949	79	66.51	20.3	1.144	1.685	1.86	3.756	1.575
3_January_24_2015_31930890	1560-2282	4_May_09_2015_32842171	3002-3598	73	70.05	31.8	1.135	1.642	1.956	3.71	1.58
3_January_24_2015_31930890	1560-2282	4_May_09_2015_32875734	1883-2468	71	70	79.67	1.013	1.769	2.048	3.77	1.622
3_January_24_2015_31930890	1560-2282	4_May_09_2015_32957875	2718-3328	78	72.25	82.04	1.065	1.624	1.861	3.758	1.582
3_January_24_2015_31930890	1560-2282	4_May_09_2015_33214500	1328-1928	72	74.46	87.64	1.045	1.605	1.839	3.612	1.499
3_January_24_2015_31930890	1560-2282	4_May_09_2015_33318671	307-883	65	74.98	63.61	0.981	1.537	1.881	3.66	1.375
3_January_24_2015_31930890	1560-2282	4_May_09_2015_33387765	2083-2668	60	67.05	48.05	1.141	1.465	1.758	3.547	1.556
3_January_24_2015_31930890	1560-2282	4_May_09_2015_33476546	77-677	71	72.53	88.05	1.14	1.415	1.491	3.788	1.513
3_January_24_2015_31930890	1560-2282	4_May_09_2015_33498296	885-1469	74	69.85	87.5	1.084	1.557	1.957	3.551	1.521
3_January_24_2015_31930890	1560-2282	4_May_09_2015_33554031	2118-2724	67	67.29	35.07	1.092	1.431	1.595	3.592	1.592
3_January_24_2015_31930890	1560-2282	4_May_09_2015_33666187	292-869	68	68.02	31.33	1.128	1.399	1.637	3.779	1.533
3_January_24_2015_31930890	1560-2282	4_May_09_2015_33742546	544-1125	63	68.15	29.72	1.146	1.491	1.627	3.674	1.595
3_January_24_2015_31930890	1560-2282	4_May_09_2015_33821640	3513-4076	65	66.66	68.05	1.075	1.47	2.152	3.835	1.609
3_January_24_2015_31930890	1560-2282	4_May_09_2015_34094625	402-970	76	69.73	88.33	1.109	1.451	2.126	3.615	1.574
3_January_24_2015_31930890	1560-2282	4_May_09_2015_34191953	2655-3233	65	73.29	58.11	1.069	1.586	1.977	3.673	1.615
3_January_24_2015_31930890	1560-2282	4_May_09_2015_34318687	622-1207	67	69.42	93.05	1.007	1.524	2.022	3.792	1.59
3_January_24_2015_31930890	1560-2282	4_May_09_2015_34448203	1300-1889	73	71.38	81.66	1.134	1.498	1.853	3.598	1.552
3_January_24_2015_31930890	1560-2282	4_May_09_2015_34533359	969-1539	74	72.29	87.22	1.051	1.548	2.193	3.527	1.584
3_January_24_2015_31930890	1560-2282	4_May_09_2015_35480343	476-1044	61	66.02	52.37	1.032	1.413	1.741	3.423	1.389
3_January_24_2015_31930890	1560-2282	4_May_09_2015_35848718	3021-3581	68	67.53	34.73	1.192	1.389	1.881	3.806	1.563
3_January_24_2015_31883109	1588-2318	4_May_09_2015_32636375	3362-3949	64	67	43.5	2.53	1.859	2.295	3.287	1.757
3_January_24_2015_31883109	1588-2318	4_May_09_2015_32842171	3002-3598	60	66.55	44.79	2.475	1.876	2.288	3.267	1.742
3_January_24_2015_31883109	1588-2318	4_May_09_2015_32875734	1883-2468	51	72.27	56.68	2.61	1.993	2.38	3.304	1.818
3_January_24_2015_31883109	1588-2318	4_May_09_2015_32957875	2718-3328	57	68.89	44.04	2.651	1.841	2.285	3.311	1.757
3_January_24_2015_31883109	1588-2318	4_May_09_2015_33214500	1328-1928	57	64.97	40.36	2.246	1.936	2.219	3.187	1.681
3_January_24_2015_31883109	1588-2318	4_May_09_2015_33318671	307-883	49	65.78	71.47	2.089	1.878	2.403	3.286	1.532
3_January_24_2015_31883109	1588-2318	4_May_09_2015_33387765	2083-2668	43	69.48	72.81	2.688	1.657	2.304	3.162	1.701
3_January_24_2015_31883109	1588-2318	4_May_09_2015_33476546	77-677	58	65.08	35.92	2.471	1.653	2.027	3.375	1.648
3_January_24_2015_31883109	1588-2318	4_May_09_2015_33498296	885-1469	58	70.15	77.8	2.302	1.79	2.397	3.109	1.717
3_January_24_2015_31883109	1588-2318	4_May_09_2015_33554031	2118-2724	48	65.91	58.94	3.428	1.599	2.132	3.21	1.778
3_January_24_2015_31883109	1588-2318	4_May_09_2015_33666187	292-869	54	69.05	49.16	2.438	1.69	2.094	3.362	1.708
3_January_24_2015_31883109	1588-2318	4_May_09_2015_33742546	544-1125	55	69.1	47.8	2.545	1.666	2.244	3.282	1.777
3_January_24_2015_31883109	1588-2318	4_May_09_2015_33821640	3513-4076	44	69.6	57.83	2.416	1.731	2.539	3.515	1.738
3_January_24_2015_31883109	1588-2318	4_May_09_2015_34094625	402-970	61	67.66	50.34	2.283	1.681	2.447	3.202	1.759
3_January_24_2015_31883109	1588-2318	4_May_09_2015_34191953	2655-3233	62	70.72	58.66	2.37	1.758	2.398	3.286	1.796
3_January_24_2015_31883109	1588-2318	4_May_09_2015_34318687	622-1207	52	71.48	53.39	2.356	1.757	2.402	3.057	1.704
3_January_24_2015_31883109	1588-2318	4_May_09_2015_34448203	1300-1889	49	69.57	49.07	2.398	1.767	2.341	3.21	1.715
3_January_24_2015_31883109	1588-2318	4_May_09_2015_34533359	969-1539	48	69.62	62.55	2.348	1.633	2.232	3.181	1.81
3_January_24_2015_31883109	1588-2318	4_May_09_2015_35480343	476-1044	58	67.63	34.81	2.29	1.71	2.205	3.113	1.494
3_January_24_2015_31883109	1588-2318	4_May_09_2015_35848718	3021-3581	53	68.35	33.98	2.581	1.619	2.449	3.371	1.745
3_January_24_2015_31866906	1735-2452	4_May_09_2015_32636375	3362-3949	67	69.21	68.87	2.363	1.793	2.038	3.381	1.707
3_January_24_2015_31866906	1735-2452	4_May_09_2015_32842171	3002-3598	64	70.97	79.78	2.307	1.808	2.123	3.322	1.723
3_January_24_2015_31866906	1735-2452	4_May_09_2015_32875734	1883-2468	65	71.6	62.2	2.238	1.682	2.311	3.462	1.764
3_January_24_2015_31866906	1735-2452	4_May_09_2015_32957875	2718-3328	66	72.23	35.43	2.492	1.771	2.042	3.371	1.687
3_January_24_2015_31866906	1735-2452	4_May_09_2015_33214500	1328-1928	71	68.76	83.26	2.108	1.866	2.007	3.234	1.63
3_January_24_2015_31866906	1735-2452	4_May_09_2015_33318671	307-883	57	72.13	72.64	1.962	1.801	2.063	3.272	1.517
3_January_24_2015_31866906	1735-2452	4_May_09_2015_33387765	2083-2668	61	65.9	71.54	2.284	1.621	1.834	3.106	1.604
3_January_24_2015_31866906	1735-2452	4_May_09_2015_33476546	77-677	66	70.54	73.09	2.412	1.587	1.682	3.399	1.642
3_January_24_2015_31866906	1735-2452	4_May_09_2015_33498296	885-1469	64	72.57	63.06	2.201	1.72	2.13	3.175	1.685
3_January_24_2015_31866906	1735-2452	4_May_09_2015_33554031	2118-2724	45	70.66	62.9	3.167	1.534	1.783	3.21	1.75
3_January_24_2015_31866906	1735-2452	4_May_09_2015_33666187	292-869	63	69.94	63.43	2.412	1.618	1.817	3.391	1.67
3_January_24_2015_31866906	1735-2452	4_May_09_2015_33742546	544-1125	63	71.33	63.65	2.575	1.6	1.826	3.283	1.753
3_January_24_2015_31866906	1735-2452	4_May_09_2015_33821640	3513-4076	56	67.88	59.1	2.351	1.665	2.327	3.435	1.732
3_January_24_2015_31866906	1735-2452	4_May_09_2015_34094625	402-970	68	67.78	64.97	2.246	1.646	2.158	3.049	1.817
3_January_24_2015_31866906	1735-2452	4_May_09_2015_34191953	2655-3233	61	72.52	72.91	2.289	1.724	2.341	3.057	1.69
3_January_24_2015_31866906	1735-2452	4_May_09_2015_34318687	622-1207	63	71.46	55.67	2.221	1.726	2.199	3.4	1.721
3_January_24_2015_31866906	1735-2452	4_May_09_2015_34448203	1300-1889	61	70.89	69.06	2.282	1.694	2.03	3.212	1.71
3_January_24_2015_31866906	1735-2452	4_May_09_2015_34533359	969-1539	64	68.07	66.89	2.289	1.564	1.985	3.128	1.803
3_January_24_2015_31866906	1735-2452	4_May_09_2015_35480343	476-1044	67	71.3	83.58	2.237	1.648	1.905	3.072	1.479
3_January_24_2015_31866906	1735-2452	4_May_09_2015_35848718	3021-3581	57	71.25	67.98	2.592	1.551	2.068	3.414	1.717
3_January_24_2015_31861828	3890-4601	4_May_09_2015_32636375	3362-3949	57	68.33	46.35	2.143	1.822	2.051	3.659	1.657
3_January_24_2015_31861828	3890-4601	4_May_09_2015_32842171	3002-3598	62	68.97	62.03	2.093	1.818	2.139	3.635	1.623
3_January_24_2015_31861828	3890-4601	4_May_09_2015_32875734	1883-2468	65	70.31	57.08	2.226	1.944	2.217	3.67	1.712
3_January_24_2015_31861828	3890-4601	4_May_09_2015_32957875	2718-3328	66	71.31	55.43	2.276	1.791	2.054	3.685	1.632
3_January_24_2015_31861828	3890-4601	4_May_09_2015_33214500	1328-1928	63	66.66	49.93	1.879	1.856	2.027	3.549	1.552
3_January_24_2015_31861828	3890-4601	4_May_09_2015_33318671	307-883	58	68.25	28.47	1.729	1.795	2.089	3.653	1.437
3_January_24_2015_31861828	3890-4601	4_May_09_2015_33387765	2083-2668	52	68.83	48.83	2.327	1.615	1.97	3.518	1.623
3_January_24_2015_31861828	3890-4601	4_May_09_2015_33476546	77-677	59	70.48	41.4	2.112	1.597	1.705	3.733	1.572
3_January_24_2015_31861828	3890-4601	4_May_09_2015_33498296	885-1469	58	67.59	71.66	2.135	1.718	2.141	3.321	1.705
3_January_24_2015_31861828	3890-4601	4_May_09_2015_33554031	2118-2724	50	68.16	67.39	3.024	1.563	1.805	3.566	1.685
3_January_24_2015_31861828	3890-4601	4_May_09_2015_33666187	292-869	56	65.68	48.41	2.087	1.618	1.831	3.727	1.592
3_January_24_2015_31861828	3890-4601	4_May_09_2015_33742546	544-1125	47	66.96	51.88	2.214	1.624	1.849	3.651	1.638
3_January_24_2015_31861828	3890-4601	4_May_09_2015_33821640	3513-4076	39	70.26	56.52	2.051	1.671	2.346	3.866	1.651
3_January_24_2015_31861828	3890-4601	4_May_09_2015_34094625	402-970	63	69.71	41.86	1.908	1.63	2.292	3.568	1.673
3_January_24_2015_31861828	3890-4601	4_May_09_2015_34191953	2655-3233	54	68.77	74.41	2.006	1.718	2.17	3.648	1.669
3_January_24_2015_31861828	3890-4601	4_May_09_2015_34318687	622-1207	54	66.32	41.12	2.008	1.729	2.216	3.722	1.626
3_January_24_2015_31861828	3890-4601	4_May_09_2015_34448203	1300-1889	55	66.7	73.48	2.029	1.699	2.053	3.581	1.613
3_January_24_2015_31861828	3890-4601	4_May_09_2015_34533359	969-1539	54	66.41	37	1.988	1.575	2.005	3.527	1.723
3_January_24_2015_31861828	3890-4601	4_May_09_2015_35480343	476-1044	55	65.5	52.33	1.936	1.65	1.922	3.463	1.415
3_January_24_2015_31861828	3890-4601	4_May_09_2015_35848718	3021-3581	52	64.62	54.6	2.229	1.565	2.082	3.741	1.667
3_January_24_2015_31825562	3920-4640	4_May_09_2015_32636375	3362-3949	77	76.87	85.5	0.702	1.352	3.753	2.852	0.618
3_January_24_2015_31825562	3920-4640	4_May_09_2015_32842171	3002-3598	76	75.26	86.3	0.699	1.353	3.883	2.687	0.63
3_January_24_2015_31825562	3920-4640	4_May_09_2015_32875734	1883-2468	76	76.3	86.84	0.698	1.42	4.157	2.784	0.657
3_January_24_2015_31825562	3920-4640	4_May_09_2015_32957875	2718-3328	77	77.84	85.77	0.689	1.414	3.728	2.934	0.606
3_January_24_2015_31825562	3920-4640	4_May_09_2015_33214500	1328-1928	73	76.8	48.99	0.694	1.422	3.717	2.743	0.588
3_January_24_2015_31825562	3920-4640	4_May_09_2015_33318671	307-883	65	77.72	73.15	0.71	1.327	3.576	2.426	0.55
3_January_24_2015_31825562	3920-4640	4_May_09_2015_33387765	2083-2668	74	75.39	85.77	0.773	1.266	3.602	2.5	0.586
3_January_24_2015_31825562	3920-4640	4_May_09_2015_33476546	77-677	76	78.31	39.06	0.691	1.297	3.277	2.798	0.585
3_January_24_2015_31825562	3920-4640	4_May_09_2015_33498296	885-1469	72	77.02	40.93	0.716	1.401	4.022	2.761	0.594
3_January_24_2015_31825562	3920-4640	4_May_09_2015_33554031	2118-2724	73	75.36	86.3	0.727	1.309	3.452	2.503	0.618
3_January_24_2015_31825562	3920-4640	4_May_09_2015_33666187	292-869	72	72.75	43.08	0.723	1.266	3.439	2.616	0.599
3_January_24_2015_31825562	3920-4640	4_May_09_2015_33742546	544-1125	73	76.04	87.11	0.735	1.282	3.498	2.457	0.626
3_January_24_2015_31825562	3920-4640	4_May_09_2015_33821640	3513-4076	70	72.87	71	0.715	1.293	3.914	3.252	0.648
3_January_24_2015_31825562	3920-4640	4_May_09_2015_34094625	402-970	75	74.44	45.5	0.802	1.345	3.917	2.887	0.613
3_January_24_2015_31825562	3920-4640	4_May_09_2015_34191953	2655-3233	72	76.89	87.65	0.722	1.361	4.009	2.776	0.632
3_January_24_2015_31825562	3920-4640	4_May_09_2015_34318687	622-1207	71	72.63	38.25	0.737	1.308	4.081	2.815	0.632
3_January_24_2015_31825562	3920-4640	4_May_09_2015_34448203	1300-1889	74	76.65	41.74	0.706	1.298	4.013	2.738	0.62
3_January_24_2015_31825562	3920-4640	4_May_09_2015_34533359	969-1539	73	77.77	88.18	0.779	1.343	4.063	3.007	0.626
3_January_24_2015_31825562	3920-4640	4_May_09_2015_35480343	476-1044	71	75.37	76.64	0.698	1.359	3.004	2.774	0.547
3_January_24_2015_31825562	3920-4640	4_May_09_2015_35848718	3021-3581	71	77.71	44.42	0.731	1.308	3.564	2.952	0.615
3_January_24_2015_31798250	2915-3640	4_May_09_2015_32636375	3362-3949	75	78.08	85.05	0.711	1.42	3.883	2.983	0.659
3_January_24_2015_31798250	2915-3640	4_May_09_2015_32842171	3002-3598	75	74.96	86.41	0.706	1.431	3.988	2.846	0.686
3_January_24_2015_31798250	2915-3640	4_May_09_2015_32875734	1883-2468	76	74.87	38.58	0.69	1.495	4.275	2.898	0.695
3_January_24_2015_31798250	2915-3640	4_May_09_2015_32957875	2718-3328	76	77.9	85.32	0.693	1.488	3.845	3.056	0.65
3_January_24_2015_31798250	2915-3640	4_May_09_2015_33214500	1328-1928	73	73.74	30.43	0.701	1.506	3.838	2.847	0.643
3_January_24_2015_31798250	2915-3640	4_May_09_2015_33318671	307-883	65	76.56	41.57	0.718	1.405	3.711	2.559	0.595
3_January_24_2015_31798250	2915-3640	4_May_09_2015_33387765	2083-2668	73	73.91	86.68	0.78	1.331	3.738	2.679	0.629
3_January_24_2015_31798250	2915-3640	4_May_09_2015_33476546	77-677	75	77.29	86.14	0.686	1.368	3.41	2.915	0.627
3_January_24_2015_31798250	2915-3640	4_May_09_2015_33498296	885-1469	72	76.52	28.53	0.721	1.338	3.941	2.85	0.678
3_January_24_2015_31798250	2915-3640	4_May_09_2015_33554031	2118-2724	71	72.71	79.89	0.766	1.262	3.726	2.785	0.662
3_January_24_2015_31798250	2915-3640	4_May_09_2015_33666187	292-869	71	75.71	48.91	0.717	1.309	3.906	2.981	0.633
3_January_24_2015_31798250	2915-3640	4_May_09_2015_33742546	544-1125	72	73.99	86.68	0.718	1.337	3.656	2.605	0.677
3_January_24_2015_31798250	2915-3640	4_May_09_2015_33821640	3513-4076	72	75.13	87.22	0.765	1.281	3.778	2.814	0.642
3_January_24_2015_31798250	2915-3640	4_May_09_2015_34094625	402-970	75	74.67	21.46	0.804	1.418	4.038	3.051	0.657
3_January_24_2015_31798250	2915-3640	4_May_09_2015_34191953	2655-3233	69	74.92	47.82	0.714	1.431	4.133	2.885	0.67
3_January_24_2015_31798250	2915-3640	4_May_09_2015_34318687	622-1207	70	73.73	45.92	0.747	1.383	4.219	2.923	0.67
3_January_24_2015_31798250	2915-3640	4_May_09_2015_34448203	1300-1889	73	75.82	40.76	0.704	1.369	4.137	2.886	0.65
3_January_24_2015_31798250	2915-3640	4_May_09_2015_34533359	969-1539	71	73.89	39.4	0.715	1.305	3.925	2.76	0.681
3_January_24_2015_31798250	2915-3640	4_May_09_2015_35480343	476-1044	72	75.47	26.35	0.699	1.423	3.137	2.924	0.591
3_January_24_2015_31798250	2915-3640	4_May_09_2015_35848718	3021-3581	70	78.11	27.44	0.718	1.37	3.724	3.075	0.646
				63.07

[truncated: 3 more sheets: yellow 33 vs green 68, yellow 23 vs blue 63, yellow 37 vs blue 59]
