# Supplementary material for: miR-9 regulates basal ganglia-dependent developmental vocal learning and adult vocal performance in songbirds
Source: eLife journal article supplement (doi:10.7554/elife.29087), 2018-01-18
Supplement: supp [file elife-29087-supp-v1.zip › elife_poa_e29087_Figure_4_source_data_1.xlsx]

## Sheet: summary
Control
	Duration	Mean freq	Goodness	FM	Entropy
grey 140	0.0611144	0.140142	0.132215	0.162535	-0.096829
grey 147	0.0492223	0.123217	0.135583	0.163499	-0.088702
grey 180	0.0545947	0.148089	0.124442	0.181031	-0.0923947
yellow 16	0.0531133	0.1383	0.111436	0.171131	-0.0916263
yellow 29	0.0461756	0.0887799	0.106165	0.0797388	-0.0896317
yellow 37	0.0452718	0.0736166	0.0911702	0.0913422	-0.114157
mean	0.051582	0.118691	0.116835	0.141546	-0.0955567
SD	0.00594816	0.0305149	0.0170151	0.0440394	0.00954061
SE	0.00242833	0.0124576	0.00694638	0.017979	0.00389494
miR-9
	Duration	Mean freq	Goodness	FM	Entropy
grey 139	0.0609535	0.0971939	0.152653	0.165235	-0.118413
grey 146	0.0584633	0.100791	0.130476	0.106438	-0.128942
yellow 14	0.100103	0.0969313	0.153714	0.112063	-0.193714
yellow 23	0.0923692	0.0903893	0.168011	0.097848	-0.163092
yellow 30	0.12442	0.136604	0.141655	0.156579	-0.159647
yellow 33	0.134726	0.0876679	0.134252	0.13834	-0.0934557
mean	0.0951725	0.101596	0.146793	0.129417	-0.142877
SD	0.0315296	0.0178153	0.0140169	0.0280218	0.0360817
SE	0.0128719	0.00727307	0.00572239	0.0114399	0.0147303
Mann-Whitney U
Test Statisticsa
	Duration	MeanFre	Goodness	FM	Entropy
Mann-Whitney U	2	12	3	14	2
Wilcoxon W	23	33	24	35	23
Z	-2.56205	-0.960769	-2.40192	-0.640513	-2.56205
Asymp. Sig. (2-tailed)	0.0104056	0.336668	0.0163092	0.521839	0.0104056
Exact Sig. [2*(1-tailed Sig.)]	.009b	.394b	.015b	.589b	.009b
a. Grouping Variable: Group
b. Not corrected for ties.

## Sheet: grey 139
	syllable	song file	duration		Duration	Amplitude	Pitch	Mean freq	Peak_freq	Goodness	FM	AM	Entropy
	syllable 1	30733031	2237-2913		59.362	58.432	512	4667.5	4566.6	886.57	33.076	0	-2.078
	syllable 1	30903968	1991-2634		59.83	57.8	525	4812.7	4940.8	956.83	32.9	0.0016	-1.807
	syllable 1	30970546	2271-2909		52.89	54.457	525	4516.5	4395.3	930.38	22.687	0.0041	-1.875
	syllable 1	31215421	1060-1718		57.168	59.387	512	4741	4737.3	1041.1	32.919	0.0029	-1.878
	syllable 1	31394937	1000-1641		57.26	57.365	495.5	4231.2	4126.5	956.79	29.049	0	-2.123
	syllable 1	31488984	1303-1951		61.47	58.316	512	4014.4	4009.3	895.34	30.698	0.0012	-2.13
	syllable 1	32388953	4207-4858		59.917	59.66	512	4573.7	4597.7	817.06	24.439	2.826	-2.042
	syllable 1	32966906	1107-1763		60.8	59.727	512	4470.5	4366.4	605.63	35.694	0.002	-1.856
	syllable 1	33060703	2180-2841		62.7	62.657	525	3564.8	3641.5	456.07	34.424	0	-1.07
	syllable 1	33191109	2438-3093		54.85	56.328	512	4278.8	4551.2	931.98	26.869	0.0056	-1.803
	syllable 1	33244968	1336-1988		54.75	56.63	512	4572.8	4589.8	900.13	27.657	0.0023	-1.883
	syllable 1	33432953	1037-1687		58.466	56.833	525	4343.4	4228.9	872.3	27.446	0.0005	-1.821
	syllable 1	33492156	884-1532		55.812	56.707	512	4261.9	4418.2	745.49	34.525	-0.001	-1.872
	syllable 1	33548218	752-1408		61.59	60.261	490	3844.8	3439.4	587.82	29.225	0	-1.335
	syllable 1	33693968	3349-4000		58.66	59.417	525	4123.2	4129.7	784.94	33.351	-0.001	-2.176
	syllable 1	38043015	1285-1933		55.73	56.699	525	3916.1	3721.3	813.66	28.957	0	-1.948
	syllable 1	39322359	1556-2210		55.85	58.923	512	4367.6	4357.3	783.41	33.335	0.0088	-1.75
	syllable 1	39457000	904-1574		61.519	60.875	512	4237	4438.8	683.34	33.814	0.0045	-1.127
	syllable 1	39501968	1119-1768		51.832	58.067	518.5	4395.4	4858.5	948.82	20.779	0.0002	-2.217
	syllable 1	39613656	2573-3212		52.632	57.293	525	3957.5	3928.7	903.65	23.51	0.0146	-2.212
			mean		57.6544	58.2917	514.95	4294.54	4302.16	825.065	29.7677	0.143615	-1.85015
			SD		3.27386	1.87884	9.75341	321.875	401.717	147.351	4.41962	0.631379	0.327483
			C.V.		0.0567841	0.0322318	0.0189405	0.0749499	0.0933757	0.178594	0.14847	4.39633	-0.177004
	syllable 2	30733031	2237-2913		39.09	51.582	537	3918.2	3269.3	669.96	22.602	-0.005	-1.028
	syllable 2	30903968	1991-2634		44.197	51.034	531	3661.7	3577.5	594.75	29.913	-0.002	-1.408
	syllable 2	30970546	2271-2909		37.813	48.761	537	2951.1	1898.5	571.36	21.333	-0.004	-1.024
	syllable 2	31215421	1060-1718		55.73	52.998	565	4206.7	4289.2	635.37	40.551	0	-1.263
	syllable 2	31394937	1000-1641		46.393	50.9	551	3413.9	2994.6	584.25	39.818	-0.001	-1.18
	syllable 2	31488984	1303-1951		50.484	53.128	551	3835.3	4279.9	675.85	36.555	0.0013	-0.866
	syllable 2	32388953	4207-4858		45.595	51.823	551	3367	2830.3	559.77	31.9	0.0032	-1.139
	syllable 2	32966906	1107-1763		52.779	51.621	531	4107.2	4018	615.3	38.025	-0.001	-1.202
	syllable 2	33060703	2180-2841		58.6	56.96	595	3137.3	3166.8	790.56	47.546	0.0015	-1.193
	syllable 2	33191109	2438-3093		41.04	50.145	551	3584.8	3104	553.91	35.762	0.0037	-1.336
	syllable 2	33244968	1336-1988		47.81	50.441	537	3830.2	3506.4	579.54	28.632	0.0006	-1.337
	syllable 2	33432953	1037-1687		42.02	49.7	551	3056.1	1907.3	511.22	24.744	0.0015	-1.006
	syllable 2	33492156	884-1532		48.288	51.344	544	4372.9	4706.6	552.35	45.019	0.0013	-1.034
	syllable 2	33548218	752-1408		57.476	52.076	572.5	3697.8	4287	557.44	34.312	0.0034	-1.328
	syllable 2	33693968	3349-4000		46.93	51.58	551	3475.1	3226.2	657.13	28.867	-0.001	-1.319
	syllable 2	38043015	1285-1933		54.85	50.137	551	2199.5	1636.5	419.44	15.616	0.0005	-1.696
	syllable 2	39322359	1556-2210		47.91	53.654	551	3473.9	2795.2	538.32	20.352	0	-1.182
	syllable 2	39457000	904-1574		54.75	55.49	551	3515.5	2929.3	788.02	30.405	0.0017	-1.009
	syllable 2	39501968	1119-1768		36.96	51.624	525	3758.6	2522.6	471.45	17.839	0.0021	-1.425
	syllable 2	39613656	2573-3212		42.04	50.607	565	2558.9	1398.6	344.92	18.242	0.0021	-1.334
			mean		47.5378	51.7803	549.925	3506.09	3117.19	583.546	30.4016	0.000445	-1.21545
			SD		6.60143	1.93487	16.0265	533.041	932.387	106.836	9.31218	0.00229105	0.192375
			C.V.		0.138867	0.0373669	0.0291431	0.152033	0.299111	0.183081	0.306305	5.14843	-0.158275
	syllable 3	30733031	2237-2913		76.6	54.809	689	4124	3864.6	534.3	35.201	0.0018	-1.871
	syllable 3	30903968	1991-2634		78.2	53.555	700	4453.9	4602.5	566.28	39.002	2.9028	-1.957
	syllable 3	30970546	2271-2909		73.82	50.097	689	3563.5	3059.5	398.93	25.059	0.0025	-1.578
	syllable 3	31215421	1060-1718		78.42	55.964	689	4352.2	3566.3	541.3	35.284	-0.012	-1.804
	syllable 3	31394937	1000-1641		76.85	53.355	668	4306	4297.5	486.03	38.36	-0.001	-1.843
	syllable 3	31488984	1303-1951		83.189	57.738	689	4337.6	3922.2	523.1	35.986	-0.002	-1.59
	syllable 3	32388953	4207-4858		78.42	54.24	668	3959.6	4013.1	491.34	38.628	0.0014	-1.772
	syllable 3	32966906	1107-1763		80.16	56.646	711	4517.7	4908.4	497.01	38.789	0	-1.938
	syllable 3	33060703	2180-2841		85.84	60.442	689	4213.5	3987	496.03	39.68	-0.004	-1.365
	syllable 3	33191109	2438-3093		69.891	53.667	689	4225.8	4257.4	452.56	33.915	-0.014	-2.101
	syllable 3	33244968	1336-1988		79.182	53.745	668	4451.1	4435.8	428.97	37.905	-0.01	-2.021
	syllable 3	33432953	1037-1687		73.32	53.257	689	4306	3924.5	525.46	35.339	0.0005	-1.71
	syllable 3	33492156	884-1532		78.582	53.192	668	3817.3	3671.2	487.77	31.514	0.0003	-1.705
	syllable 3	33548218	752-1408		78.2	56.553	689	4328	4497.4	466.37	36.374	-0.002	-1.9
	syllable 3	33693968	3349-4000		81.414	55.397	668	3983.3	3690.9	499.25	37.949	-0.009	-2.137
	syllable 3	38043015	1285-1933		77.23	54.794	668	3673	3889.7	436.84	35.246	0.0002	-1.968
	syllable 3	39322359	1556-2210		76.5	55.043	668	3778.4	3967.2	431.57	33.763	0.0028	-1.861
	syllable 3	39457000	904-1574		80.16	59.244	689	4129.1	4118.5	573.33	39.917	0.0006	-1.514
	syllable 3	39501968	1119-1768		72.84	53.491	668	3621.6	3053.9	467.38	32.383	-0.002	-1.954
	syllable 3	39613656	2573-3212		79.18	51.387	668	2931.3	2711.5	343.26	23.067	-0.001	-1.961
			mean		77.8999	54.8308	681.2	4053.65	3921.95	482.354	35.1681	0.142795	-1.8275
			SD		3.63188	2.46278	13.2927	393.943	540.361	56.6601	4.49303	0.649656	0.200313
			C.V.		0.0466224	0.044916	0.0195136	0.0971823	0.137778	0.117466	0.127759	4.54957	-0.10961
	syllable 4	30733031	2237-2913		118.32	54.112	565	4535.2	4653.7	452.16	42.576	-0.004	-1.812
	syllable 4	30903968	1991-2634		119.25	54.224	580	4350.8	4611.3	369.34	39.455	-0.009	-2.081
	syllable 4	30970546	2271-2909		109.5	50.531	565	3864.9	3792.5	328.91	32.863	-0.002	-1.63
	syllable 4	31215421	1060-1718		121.37	55.886	595	4576.5	4712.5	354.58	43.816	-0.006	-1.932
	syllable 4	31394937	1000-1641		113.4	54.017	565	4551.6	4706.3	362.36	43.069	-0.012	-1.973
	syllable 4	31488984	1303-1951		120.72	57.476	580	4667.9	4908.1	350.18	41.959	-0.008	-1.917
	syllable 4	32388953	4207-4858		117.3	55.588	580	4283.6	4380.7	375.57	40.71	-0.011	-2.054
	syllable 4	32966906	1107-1763		121.7	54.807	595	4801.2	4871.6	364.01	41.426	-0.005	-1.911
	syllable 4	33060703	2180-2841		119.7	61.155	580	4242.2	4401.5	584.83	52.257	-0.009	-1.841
	syllable 4	33191109	2438-3093		112.74	51.999	580	3586.4	3484.1	387.97	40.724	-0.007	-1.989
	syllable 4	33244968	1336-1988		115.78	52.62	565	4235.4	4413.5	333.84	39.293	-0.007	-1.943
	syllable 4	33432953	1037-1687		121.62	52.005	565	3964.9	3957.7	399.33	35.12	-0.003	-1.862
	syllable 4	33492156	884-1532		120.22	52.75	580	3949.1	3849.2	364.47	32.638	0.0009	-1.896
	syllable 4	33548218	752-1408		126.51	56.039	612	4738.5	5057.4	333.05	45.087	-0.01	-2.147
	syllable 4	33693968	3349-4000		116.43	56.388	612	4807.5	5095.4	392.24	43.303	-0.01	-2.153
	syllable 4	38043015	1285-1933		127.72	53.324	565	3672.5	3642.1	396.58	32.579	-0.003	-2.107
	syllable 4	39322359	1556-2210		108.7	54.473	580	3864.3	3825.7	352.28	30.895	-0.005	-1.489
	syllable 4	39457000	904-1574		121.13	57.769	551	3987.4	4151.8	418.33	39.211	-0.004	-1.771
	syllable 4	39501968	1119-1768		112.72	52.557	580	3814.1	3389.3	332.92	27.239	-0.001	-1.912
	syllable 4	39613656	2573-3212		110.4	50.366	565	2624.8	1434.7	292.23	21.346	-0.004	-2.094
			mean		117.761	54.4043	578	4155.94	4166.95	377.259	38.2783	-0.005955	-1.9257
			SD		5.28991	2.61896	15.9506	527.378	830.297	60.4604	7.05023	0.00353605	0.168053
			C.V.		0.0449205	0.0481388	0.0275962	0.126897	0.199257	0.160262	0.184183	-0.593795	-0.0872685
	syllable 5	30733031	2237-2913		214.2	59.665	865	4545.9	4513.8	192.8	42.072	-0.001	-2.103
	syllable 5	30903968	1991-2634		211.41	57.849	958	4669.9	4720.4	202.2	41.286	0	-2.033
	syllable 5	30970546	2271-2909		207.12	55.777	787	4624.5	4672.9	202.92	44.209	-0.003	-2.038
	syllable 5	31215421	1060-1718		216.45	60.354	1004	4778.7	5047.5	233.47	45.778	-0.004	-2.013
	syllable 5	31394937	1000-1641		212.61	59.677	787	4528.2	4536.1	222.72	43.647	0	-2.009
	syllable 5	31488984	1303-1951		216.5	61.502	773.5	4380.2	4404.4	231.64	44.545	-0.001	-2.21
	syllable 5	32388953	4207-4858		214.1	59.462	787	4685.2	4788.1	204.31	42.628	-0.003	-1.956
	syllable 5	32966906	1107-1763		207.72	60.89	1002	4582.6	4620.3	199.54	44.578	-0.005	-2.289
	syllable 5	33060703	2180-2841		216.95	64.051	1002	4027	3928.8	287.19	48.589	-0.006	-1.914
	syllable 5	33191109	2438-3093		210.42	56.64	980	4601	4742.8	209.63	48.126	0	-2.123
	syllable 5	33244968	1336-1988		214.1	57.813	816	4758.7	4749.1	205.5	43.805	-0.001	-2.186
	syllable 5	33432953	1037-1687		212.51	58.139	918	4580	4542.5	197	44.71	-0.001	-2.053
	syllable 5	33492156	884-1532		215.1	57.523	832	4625.4	4703	207.59	42.37	-0.004	-2.204
	syllable 5	33548218	752-1408		217.15	61.319	958	4457	4468.3	206.09	44.94	0	-2.276
	syllable 5	33693968	3349-4000		211.33	60.627	1050	4549.4	4594.2	222.95	45.769	-0.006	-2.172
	syllable 5	38043015	1285-1933		211.37	59.811	1002	4488	4520.3	210	42.135	-0.001	-2.088
	syllable 5	39322359	1556-2210		212.39	58.873	958	4523.4	4462.7	192.76	42.742	-0.001	-2.086
	syllable 5	39457000	904-1574		217.2	63.005	848	4486.8	4649.3	263.44	43.14	-0.002	-1.777
	syllable 5	39501968	1119-1768		204.3	58.103	760	4465.8	4427.4	183.41	38.721	-0.003	-2.119
	syllable 5	39613656	2573-3212		207.22	56.593	918	4463.1	4626.7	173.32	38.079	-0.001	-2.201
			mean		212.507	59.3837	900.275	4541.04	4585.93	212.424	43.5934	-0.00215	-2.0925
			SD		3.73449	2.15577	94.9196	158.512	215.729	26.3119	2.59191	0.00198083	0.125354
			C.V.		0.0175735	0.0363024	0.105434	0.0349066	0.0470414	0.123865	0.0594563	-0.921316	-0.0599065
					Duration	Amplitude	Pitch	Mean freq	Peak_freq	Goodness	FM	AM	Entropy
			syllable 1	C.V.	0.0567841	0.0322318	0.0189405	0.0749499	0.0933757	0.178594	0.14847	4.39633	-0.177004
			syllable 2	C.V.	0.138867	0.0373669	0.0291431	0.152033	0.299111	0.183081	0.306305	5.14843	-0.158275
			syllable 3	C.V.	0.0466224	0.044916	0.0195136	0.0971823	0.137778	0.117466	0.127759	4.54957	-0.10961
			syllable 4	C.V.	0.0449205	0.0481388	0.0275962	0.126897	0.199257	0.160262	0.184183	-0.593795	-0.0872685
			syllable 5	C.V.	0.0175735	0.0363024	0.105434	0.0349066	0.0470414	0.123865	0.0594563	-0.921316	-0.0599065
				mean	0.0609535	0.0397912	0.0401255	0.0971939	0.155313	0.152653	0.165235	2.51585	-0.118413

## Sheet: grey 140
song file	duration	syllable	Duration	Amplitude	Pitch	Mean freq	Peak_freq	Goodness	FM	AM	Entropy
28805500	1536-2534	syllable 1	65.165	50.898	595	3130.2	3767.2	840.28	18.736	0.0021	-2.141
29346593	2397-3409	syllable 1	67.85	51.629	580	2699.9	3036.5	1019.1	13.778	0.0021	-2.349
29378859	826-1831	syllable 1	63.24	51.579	595	3001.4	3606.4	945.21	16.48	0.0008	-2.232
29728046	895-1851	syllable 1	60.561	52.215	595	2865.5	2945.7	872.36	15.835	-0.004	-2.359
29768968	894-1863	syllable 1	61.59	50.655	595	2925.6	3442.3	869.51	14.148	-0.002	-2.217
30534171	1965-2937	syllable 1	60.81	51.294	595	3623.3	4069.4	1012.8	15.528	0.0059	-2.29
31846515	2504-3479	syllable 1	62.97	50.846	580	2926.9	3143.1	931.71	15.398	0.0037	-1.798
32024437	2915-3888	syllable 1	65.164	51.38	580	2286.1	2132.1	832.12	15.433	0.0003	-2.301
32556625	469-1435	syllable 1	63.54	50.617	580	2822.2	2970.1	839.15	19.629	-0.005	-1.907
33387781	1709-2669	syllable 1	54.75	52.338	595	2499.1	2142.3	943.44	11.745	0	-1.643
33939187	1963-2916	syllable 1	65.815	49.819	595	2693.3	2972.2	868.22	22.87	-0.001	-2.007
34920078	2018-2976	syllable 1	62.857	52.286	595	2282.3	2212.1	875.33	14.569	0.0038	-2.435
35213406	229-1166	syllable 1	67.45	50.354	595	1885.6	1884.1	685.43	17.518	-0.002	-2.353
38011562	1966-2975	syllable 1	64.52	49.729	595	2228.8	1955.3	893.53	11.385	-0.009	-2.395
38063546	1235-2243	syllable 1	60.261	48.143	580	2280.8	2108.7	877.42	21.222	-0.002	-1.827
38191048	217-1216	syllable 1	63.84	50.853	580	2258.1	2133.2	908.54	11.934	0.007	-2.183
38244671	739-1729	syllable 1	60.61	49.971	595	2403.6	2406.6	840.44	19.533	0	-2.204
38293906	2451-3442	syllable 1	63.54	50.64	595	2586.2	2805.6	796.1	11.908	0.0001	-2.381
38313734	980-1965	syllable 1	61.99	49.618	580	2137.1	1513.6	855.91	17.368	0.0037	-2.079
38345375	816-1804	syllable 1	63.54	49.103	595	2279	2935.3	754.35	16.484	0.0015	-2.637
		mean	63.0031	50.6984	589.75	2590.75	2709.09	873.048	16.0751	0.0003	-2.1869
		SD	2.89844	1.09233	7.34041	414.967	696.796	78.3618	3.21313	0.00377415	0.246722
		C.V.	0.0460048	0.0215457	0.0124466	0.160173	0.257207	0.0897566	0.199883	12.5805	-0.112818
28805500	1536-2534	syllable 2	134.29	62.682	711	3974.3	4302.4	505.57	27.964	0.0013	-2.558
29346593	2397-3409	syllable 2	136.58	64.583	735	3746.9	3742.3	562.96	25.265	0.0006	-2.771
29378859	826-1831	syllable 2	137.62	64.005	711	3818	3801	591.42	28.558	0.0013	-2.493
29728046	895-1851	syllable 2	131.27	64.686	711	3682.3	3620.2	537.66	29.316	-0.002	-2.738
29768968	894-1863	syllable 2	137.8	61.611	711	4329.1	4503.6	460.38	28.241	0.0001	-2.534
30534171	1965-2937	syllable 2	127.7	61.81	735	4330.8	4535.1	502.29	24.734	0.0033	-2.385
31846515	2504-3479	syllable 2	132.69	62.506	711	4074	4181	535.06	31.985	-0.001	-2.426
32024437	2915-3888	syllable 2	131.76	63.383	711	3646.4	3661.9	474.95	28.019	-7.634	-2.614
32556625	469-1435	syllable 2	133.69	59.86	711	4018.5	4078.7	450.45	31.014	-0.001	-2.343
33387781	1709-2669	syllable 2	129.7	59.907	735	4433	4566.7	536.39	30.03	0.002	-1.989
33939187	1963-2916	syllable 2	130.27	64.243	711	4053.1	4075.4	490.41	27.897	0.0016	-2.589
34920078	2018-2976	syllable 2	137.18	63.45	711	3908.6	3877.5	582.6	30.916	-0.001	-2.326
35213406	229-1166	syllable 2	131.37	61.753	711	3391.4	3316.1	452.8	28.168	-0.004	-2.814
38011562	1966-2975	syllable 2	135.9	60.157	735	3804.5	3803.2	511.82	26.948	-0.001	-2.482
38063546	1235-2243	syllable 2	136.48	62.849	711	3793.2	3778.4	501.7	28.169	0.0042	-2.739
38191048	217-1216	syllable 2	135.49	61.654	711	4171.2	4441.2	538.12	28.219	-0.002	-2.449
38244671	739-1729	syllable 2	135.9	63.292	711	3772.4	3735.2	515.06	29.915	-0.001	-2.759
38293906	2451-3442	syllable 2	136.8	63.301	711	3771.3	3700.4	476.6	29.692	0.0006	-2.683
38313734	980-1965	syllable 2	133.9	63.355	711	3677.7	3608.7	534.44	30.851	-0.001	-2.551
38345375	816-1804	syllable 2	133.42	62.512	711	4342.3	4384.6	549.08	26.842	-0.002	-2.64
		mean	133.991	62.58	715.8	3936.95	3985.68	515.488	28.6371	-0.38175	-2.54415
		SD	2.91516	1.44828	9.84939	278.375	368.766	40.5826	1.87701	1.707	0.196381
		C.V.	0.0217565	0.0231429	0.01376	0.0707083	0.0925227	0.0787267	0.0655447	-4.47152	-0.0771893
28805500	1536-2534	syllable 3	44.7	49.877	648	1889.2	1708.9	735.78	10.586	-0.003	-2.862
29346593	2397-3409	syllable 3	57.88	50.212	648	2097.6	2136.4	723.85	14	-0.003	-2.36
29378859	826-1831	syllable 3	51.53	50.788	615	2316.9	2043.1	882.78	11.186	0.0023	-2.541
29728046	895-1851	syllable 3	53.77	50.483	648	2170.5	2143.7	610.21	17.807	0.0033	-2.225
29768968	894-1863	syllable 3	52.89	49.258	623	1915.8	1784.4	619.37	11.635	-0.001	-3.08
30534171	1965-2937	syllable 3	52.379	49.031	648	1734.6	1618.7	610.39	10.282	0.0003	-2.778
31846515	2504-3479	syllable 3	50.524	49.744	648	2239.9	1423.7	728.45	13.436	0.0004	-2.299
32024437	2915-3888	syllable 3	45.384	51.853	648	2651.6	2010.4	395.36	24.352	0.0034	-2.449
32556625	469-1435	syllable 3	52.89	47.636	648	2336	2080.4	611.02	21.898	-0.004	-2.599
33387781	1709-2669	syllable 3	56.294	50.144	646	2337.2	1981	713.96	11.246	-0.004	-2.183
33939187	1963-2916	syllable 3	57.88	49.377	658	1995.8	2103	671.83	16.581	-0.001	-2.466
34920078	2018-2976	syllable 3	57.38	50.389	648	1890.5	1514.3	773.48	13.385	-0.003	-2.383
35213406	229-1166	syllable 3	60.1	48.329	648	1056.8	770.25	637.66	12.159	0.005	-2.876
38011562	1966-2975	syllable 3	54.75	48.08	678	1640.1	1800.1	673.4	8.0099	-0.004	-3.029
38063546	1235-2243	syllable 3	52.29	48.373	648	1759.7	1653	640.11	9.8634	-0.001	-2.57
38191048	217-1216	syllable 3	51.82	49.267	648	1752.5	1656.4	646.36	11.067	-0.002	-2.622
38244671	739-1729	syllable 3	53.87	51.154	662	1905.8	1757.5	471.79	16.75	0.0016	-2.14
38293906	2451-3442	syllable 3	59.93	48.892	648	1582.6	1424.3	666.73	14.325	-0.005	-2.801
38313734	980-1965	syllable 3	52.819	50.56	648	2137.6	2115.3	827.88	12.086	-0.004	-2.411
38345375	816-1804	syllable 3	49.86	48.621	648	1971.5	1713.4	826.76	12.857	-0.011	-2.388
		mean	53.447	49.6034	647.7	1969.11	1771.91	673.359	13.6756	-0.001485	-2.5531
		SD	4.12883	1.10842	12.3804	345.762	335.544	114.304	4.06193	0.00366667	0.274825
		C.V.	0.077251	0.0223457	0.0191144	0.175593	0.189368	0.169752	0.297021	-2.46914	-0.107644
28805500	1536-2534	syllable 4	50.44	57.652	918	4086	4252.5	402.89	21.305	0.0047	-3.072
29346593	2397-3409	syllable 4	53.177	57.539	918	3854.9	3631	421.68	18.384	0.0111	-2.783
29378859	826-1831	syllable 4	54.845	60.003	918	4101.6	4021.9	377.18	19.112	-0.001	-2.944
29728046	895-1851	syllable 4	54.5	56.74	918	3697.3	3432.8	392.57	21.896	-0.001	-2.607
29768968	894-1863	syllable 4	52.29	56.401	918	3431.6	3350.8	381.61	21.151	-0.004	-3.186
30534171	1965-2937	syllable 4	51.04	55.669	918	3740.2	3749.4	374.94	29.212	0	-2.766
31846515	2504-3479	syllable 4	56.7	56.405	918	3771.3	3879.1	376.37	21.672	-0.003	-2.69
32024437	2915-3888	syllable 4	49.426	46.991	565	1604.7	1424.6	551.56	30.79	0	-2.587
32556625	469-1435	syllable 4	50.364	55.552	918	4410	4463.7	348.36	25.672	0	-2.792
33387781	1709-2669	syllable 4	52.279	57.851	918	4343.6	4271	384.19	26.1	-0.003	-2.744
33939187	1963-2916	syllable 4	51.82	55.238	918	3969.7	3885.9	390.22	24.119	-0.007	-2.49
34920078	2018-2976	syllable 4	50.474	58.061	958	4223	4063.1	440.14	30.036	0.0055	-2.923
35213406	229-1166	syllable 4	60.571	55.58	918	3668.2	3680.2	312.41	25.028	0.0042	-3.158
38011562	1966-2975	syllable 4	46.3	55.493	918	3995	4049.1	400.74	26.88	-0.001	-2.703
38063546	1235-2243	syllable 4	55.73	57.894	882	3620.1	3525.1	331.19	21.125	0.0018	-3.284
38191048	217-1216	syllable 4	52.499	55.484	501	3577	3516.8	351.43	26.205	-0.007	-2.706
38244671	739-1729	syllable 4	60.1	54.889	918	3417.8	3169.8	393.52	21.455	-0.004	-2.551
38293906	2451-3442	syllable 4	48.8	56.987	918	4193.3	4082.1	431.48	28.161	0.0138	-2.945
38313734	980-1965	syllable 4	54.75	57.755	918	3774	3866.8	384.25	22.288	0	-2.962
38345375	816-1804	syllable 4	49.83	55.51	918	4610.6	4777.7	355.97	23.075	0.0061	-2.862
		mean	52.7968	56.1847	879.7	3804.49	3754.67	390.135	24.1833	0.00081	-2.83775
		SD	3.61676	2.52205	119.661	612.016	674.249	49.3178	3.60529	0.00543845	0.219998
		C.V.	0.0685035	0.0448886	0.136025	0.160867	0.179576	0.126412	0.149082	6.71414	-0.0775256
28805500	1536-2534	syllable 5	32.25	47.774	565	2321.5	2485.3	777.6	18.306	-0.006	-2.451
29346593	2397-3409	syllable 5	46.193	47.976	565	2481.6	2793.8	559.04	22.319	0.0017	-2.451
29378859	826-1831	syllable 5	51.82	47.009	565	1582.8	1474.1	540.25	34.971	0	-2.571
29728046	895-1851	syllable 5	46.3	46.644	565	1968.9	1735.4	540.74	35.042	0.0002	-2.333
29768968	894-1863	syllable 5	33.22	47.7	565	1804.2	1622.1	608.73	22.033	-0.009	-2.579
30534171	1965-2937	syllable 5	32.915	47.813	565	2079.8	1666.6	840.41	21.93	0.0003	-2.304
31846515	2504-3479	syllable 5	42.42	47.686	565	1570.9	1285.9	607.01	24.472	0	-2.225
32024437	2915-3888	syllable 5	35.46	53.154	735	3490.4	3570.1	258.76	42.107	-0.002	-1.786
32556625	469-1435	syllable 5	30.59	47.664	580	2169.6	2076.9	627.09	25.119	-0.007	-2.018
33387781	1709-2669	syllable 5	36.46	47.5	565	2656.1	2938.9	671.87	19.918	-0.008	-1.894
33939187	1963-2916	syllable 5	45.535	46.77	580	2351.9	2657.3	417.61	28.452	0.0022	-2.264
34920078	2018-2976	syllable 5	42.742	47.867	565	1638.6	1433.2	616.23	26.241	-0.007	-2.163
35213406	229-1166	syllable 5	42.2	47.328	565	857.42	532.17	599.45	17.93	0.0078	-2.838
38011562	1966-2975	syllable 5	34.22	46.668	565	1667.1	950.15	743.74	23.24	-9.313	-2.517
38063546	1235-2243	syllable 5	44.57	45.557	551	1633.7	1082.8	478.6	22.799	-1.773	-2.317
38191048	217-1216	syllable 5	45.385	46.795	551	1913.1	2055.1	585.86	25.839	-0.005	-2.199
38244671	739-1729	syllable 5	50.884	46.828	551	2049.5	1977.3	553.92	24.48	-0.003	-2.434
38293906	2451-3442	syllable 5	39.909	48.064	565	1889.6	1214.4	717.81	22.575	0.0042	-2.315
38313734	980-1965	syllable 5	42.2	47.834	565	2618.4	3131.8	597.67	28.33	0.0006	-2.422
38345375	816-1804	syllable 5	47.1	46.186	565	1769.7	1693.6	489.03	24.784	-0.005	-2.438
		mean	41.1187	47.5408	572.9	2025.74	1918.85	591.571	25.5443	-0.55605	-2.32595
		SD	6.39288	1.48109	38.8586	546.231	796.172	129.085	5.95025	2.09877	0.242563
		C.V.	0.155474	0.031154	0.0678279	0.269645	0.414922	0.218208	0.232938	-3.77443	-0.104286
28805500	1536-2534	syllable 6	224.8	53.374	689	3828.7	3991	266.64	42.513	0.0004	-1.842
29346593	2397-3409	syllable 6	242.4	53.969	735	4095.8	4369.9	325.11	41.437	-0.001	-1.449
29378859	826-1831	syllable 6	241.15	54.409	711	3990.2	4069.6	272.38	44.069	0	-1.565
29728046	895-1851	syllable 6	233.26	54.091	711	3926.8	4013.1	288.58	40.851	0	-1.599
29768968	894-1863	syllable 6	234.36	53.977	689	3832.5	3836.7	288.83	39.042	0	-1.557
30534171	1965-2937	syllable 6	226.48	53.575	711	4053.8	4120.2	259.31	41.851	-0.002	-1.574
31846515	2504-3479	syllable 6	227.26	54.964	711	4093.8	4150.9	246.04	38.894	0	-1.465
32024437	2915-3888	syllable 6	235.69	54.624	711	3814.7	4003.9	457.68	23.548	0.0007	-2.365
32556625	469-1435	syllable 6	229.7	52.068	689	3521.5	3557.6	265.33	39.696	-0.002	-1.638
33387781	1709-2669	syllable 6	237.6	52.579	689	4091.1	4046.2	259.63	41.278	-0.001	-1.337
33939187	1963-2916	syllable 6	229.47	53.149	689	3812.3	4017.7	278.73	42.317	-0.001	-1.492
34920078	2018-2976	syllable 6	238.45	54.281	711	3476.8	3274.6	326.82	42.444	-0.001	-1.531
35213406	229-1166	syllable 6	222.29	53.155	711	3254.3	2989.5	256.9	36.951	0.0003	-1.752
38011562	1966-2975	syllable 6	230.37	51.713	787	3278	3173.4	270.62	40.142	-0.002	-1.765
38063546	1235-2243	syllable 6	240.42	52.821	700	3646.5	3756.9	287.72	40.509	0	-1.608
38191048	217-1216	syllable 6	241.45	53.055	689	3623.7	3605.4	271.94	40.853	-4.148	-1.699
38244671	739-1729	syllable 6	242.44	53.288	723	3801.5	4069.8	295.21	43.739	0	-1.636
38293906	2451-3442	syllable 6	239.45	53.651	711	3607	3492.2	301.2	41.222	0	-1.552
38313734	980-1965	syllable 6	242.54	54.385	689	3835.3	3887.8	285.07	40.383	-0.001	-1.609
38345375	816-1804	syllable 6	239.45	54.321	689	3952.6	4175.9	292.37	46.191	0.0009	-1.675
		mean	234.951	53.5724	707.25	3776.85	3830.12	289.805	40.3965	-0.207835	-1.6355
		SD	6.55379	0.860683	23.1787	254.999	368.384	44.7691	4.44896	0.927419	0.207732
		C.V.	0.0278942	0.0160658	0.0327729	0.0675165	0.0961808	0.15448	0.110132	-4.46229	-0.127014
28805500	1536-2534	syllable 7	138.16	55.192	711	3730.8	3798.5	479.83	25.144	0.001	-2.483
29346593	2397-3409	syllable 7	144.7	55.837	711	3912.8	3994	501.53	23.811	0.0019	-2.325
29378859	826-1831	syllable 7	149.5	55.304	711	3661.6	3646.8	463.25	23.605	0.0016	-2.234
29728046	895-1851	syllable 7	143.67	56.39	711	3653.6	3705.2	434.12	25.904	-0.002	-2.479
29768968	894-1863	syllable 7	145.6	55.939	711	3570.7	3510.8	503.58	25.959	-0.001	-2.339
30534171	1965-2937	syllable 7	142.7	54.011	711	3629.9	3576.3	457.77	25.596	0	-2.325
31846515	2504-3479	syllable 7	140.8	55.834	711	3819.6	3871.9	500.64	26.178	-0.001	-2.303
32556625	469-1435	syllable 7	141.67	52.536	711	3327.5	3537.5	428.87	20.864	0	-2.437
33387781	1709-2669	syllable 7	140.28	52.882	711	4312.7	4652.4	587.21	29.274	0.0009	-1.73
33939187	1963-2916	syllable 7	148.36	55.505	711	3656.3	3679.6	497.04	27.408	0.0026	-2.484
34920078	2018-2976	syllable 7	154.44	55.701	711	3766.2	3990.7	505.45	28.199	-0.001	-2.183
35213406	229-1166	syllable 7	137.88	54.16	689	3234.4	3118.2	405.82	22.513	0.0002	-2.407
38011562	1966-2975	syllable 7	144.77	51.207	689	3036.1	3180.1	480.01	23.99	-0.001	-2.394
38063546	1235-2243	syllable 7	145.4	53.982	711	3685.5	3718.6	555.4	25.862	0	-2.33
38191048	217-1216	syllable 7	149.05	55.219	711	3693.9	3695.2	486.33	26.444	-0.001	-2.366
38244671	739-1729	syllable 7	143.17	54.455	711	4036	4205.7	487.71	23.946	-0.001	-2.352
38293906	2451-3442	syllable 7	141.7	55.367	711	3630.9	3648.7	502.54	22.514	-0.001	-2.401
38313734	980-1965	syllable 7	150.35	55.414	711	3821.5	3901.8	490.42	24.046	0.0018	-2.358
38345375	816-1804	syllable 7	139.38	55.664	711	3897	4139.9	545.62	26.63	0.0015	-2.427
		mean	144.294	54.7684	708.684	3688.26	3766.94	490.165	25.1519	0.000131579	-2.33458
		SD	4.46114	1.35036	6.93664	282.121	350.765	43.2167	2.09124	0.00131109	0.166517
		C.V.	0.0309171	0.0246558	0.00978805	0.0764917	0.0931167	0.0881676	0.0831441	9.96426	-0.0713262
			Duration	Amplitude	Pitch	Mean freq	Peak_freq	Goodness	FM	AM	Entropy
	syllable 1	C.V.	0.0460048	0.0215457	0.0124466	0.160173	0.257207	0.0897566	0.199883	12.5805	-0.112818
	syllable 2	C.V.	0.0217565	0.0231429	0.01376	0.0707083	0.0925227	0.0787267	0.0655447	-4.47152	-0.0771893
	syllable 3	C.V.	0.077251	0.0223457	0.0191144	0.175593	0.189368	0.169752	0.297021	-2.46914	-0.107644
	syllable 4	C.V.	0.0685035	0.0448886	0.136025	0.160867	0.179576	0.126412	0.149082	6.71414	-0.0775256
	syllable 5	C.V.	0.155474	0.031154	0.0678279	0.269645	0.414922	0.218208	0.232938	-3.77443	-0.104286
	syllable 6	C.V.	0.0278942	0.0160658	0.0327729	0.0675165	0.0961808	0.15448	0.110132	-4.46229	-0.127014
	syllable 7	C.V.	0.0309171	0.0246558	0.00978805	0.0764917	0.0931167	0.0881676	0.0831441	9.96426	-0.0713262
		mean	0.0611144	0.0262569	0.0416764	0.140142	0.188985	0.132215	0.162535	2.01164	-0.096829

## Sheet: grey 147
song file	duration	syllable	Duration	Amplitude	Pitch	Mean freq	Peak_freq	Goodness	FM	AM	Entropy
1_January_06_2014_25277734.wav	1806-2459	syllable 1	160.13	60.213	648	3993.3	3870	443.33	28.964	-0.001	-2.294
1_January_06_2014_25353484.wav	2587-3184	syllable 1	152.63	59.582	668	4141.6	4206.1	394.98	28.92	0	-2.441
1_January_06_2014_25550390.wav	3219-3979	syllable 1	159.42	59.305	668	3901.1	3767.2	449.64	28.568	0.0005	-2.338
1_January_06_2014_25614015.wav	834-1473	syllable 1	155.4	59.61	678.5	4103.5	4094.4	447.68	35.584	-0.002	-2.291
1_January_06_2014_25984875.wav	3883-4532	syllable 1	155.69	64.644	648	3853.9	3724.6	585	30.731	0.0008	-1.821
1_January_06_2014_26149734.wav	3827-4472	syllable 1	159.3	59.53	648	3699.9	3625.9	398.27	30.128	0.0011	-2.503
1_January_06_2014_26432687.wav	2913-3551	syllable 1	152.5	60.03	668	3763.7	3610.4	508.15	26.567	0.0013	-2.234
1_January_06_2014_26545843.wav	3800-4442	syllable 1	156.84	58.758	668	3800.7	3779.4	404.15	31.152	5.6001	-2.477
1_January_06_2014_26901421.wav	1508-2153	syllable 1	157.68	61.249	648	3931.8	3861.3	410.93	26.788	0.0023	-2.713
1_January_06_2014_27289890.wav	823-1462	syllable 1	148.66	58.461	668	4129.8	4369.4	377.96	27.803	0.0008	-2.042
1_January_06_2014_27705968.wav	1565-2216	syllable 1	158.83	60.35	648	3969.1	3931.9	482.62	28.984	-0.003	-2.074
1_January_06_2014_27745312.wav	860-1504	syllable 1	155.6	61.981	668	3887.5	3960.9	540.5	34.559	-0.005	-2.163
1_January_06_2014_27974781.wav	2151-2778	syllable 1	155.4	59.837	595	4127.4	4113.2	349.6	23.509	0	-2.456
1_January_06_2014_28127031.wav	876-1514	syllable 1	149.5	59.723	668	3944.2	3976	459.21	33.671	0.0072	-2.194
1_January_06_2014_28342453.wav	634-1271	syllable 1	153.62	59.534	668	3928.7	3793	459.74	25.576	0.0024	-2.132
1_January_06_2014_28817812.wav	1374-2020	syllable 1	157.77	59.805	648	3920	3788.1	377.64	28.987	0	-2.552
1_January_06_2014_29248750.wav	1257-1908	syllable 1	155.44	63.058	658	4155.4	4056.1	512.03	26.803	0.0007	-2.245
1_January_06_2014_29306500.wav	851-1492	syllable 1	151.75	59.737	689	4066.5	4058	412.26	28.012	0.0034	-2.257
1_January_06_2014_29437656.wav	1302-1935	syllable 1	155.94	59.744	648	3747.1	3539.3	345.23	25.302	-0.002	-2.665
1_January_06_2014_29800328.wav	2708-3350	syllable 1	160.23	61.335	648	3809.5	3727.3	501.98	34.194	0.0017	-2.259
		mean	155.617	60.3243	657.425	3943.74	3892.63	443.045	29.2401	0.280465	-2.30755
		SD	3.3562	1.4812	19.1169	141.234	213.279	64.4456	3.28143	1.25211	0.217727
		C.V.	0.0215671	0.0245539	0.0290784	0.0358123	0.0547904	0.145461	0.112223	4.46442	-0.0943541
1_January_06_2014_25277734.wav	1806-2459	syllable 2	62.157	57.344	593	3467.6	3245.7	702.86	26.97	-0.008	-2.033
1_January_06_2014_25353484.wav	2587-3184	syllable 2	60.61	54.728	595	2918.7	2474.4	629.93	21.412	-0.004	-1.813
1_January_06_2014_25550390.wav	3219-3979	syllable 2	61.59	56.913	590	3131.2	2865.3	650.51	23.566	0.0036	-2.02
1_January_06_2014_25614015.wav	834-1473	syllable 2	63.54	57.499	585	3257.6	3056.3	650.39	25.3	0.0039	-1.955
1_January_06_2014_25984875.wav	3883-4532	syllable 2	63.214	58.981	595	3089.3	2706.4	516.21	27.271	-0.003	-1.401
1_January_06_2014_26149734.wav	3827-4472	syllable 2	55.473	56.148	587	3045.2	2740.2	649	22.981	0.0009	-1.93
1_January_06_2014_26432687.wav	2913-3551	syllable 2	63.45	57.869	595	3257.5	3204.2	748.12	25.141	0.0037	-2.241
1_January_06_2014_26545843.wav	3800-4442	syllable 2	64.22	56.959	595	3129.4	2810.4	692.01	22.891	-0.001	-2.296
1_January_06_2014_26901421.wav	1508-2153	syllable 2	63.84	56.347	596	3565.5	3520.1	610.54	27.86	0.0018	-2.123
1_January_06_2014_27289890.wav	823-1462	syllable 2	60.71	55.404	595	3488.9	3863.2	697.11	29.554	0.0044	-1.846
1_January_06_2014_27705968.wav	1565-2216	syllable 2	63.894	57.163	599	2984	2659.8	632.74	22.171	0.0009	-2.126
1_January_06_2014_27745312.wav	860-1504	syllable 2	53.87	60.611	594	3563.3	3332.8	770.86	28.394	0.0159	-2.025
1_January_06_2014_27974781.wav	2151-2778	syllable 2	59.63	55.83	572	3358.1	2998.5	537.73	33.328	-0.002	-1.904
1_January_06_2014_28127031.wav	876-1514	syllable 2	62.27	58.005	595	3161.8	2880.9	755.22	22.865	-0.001	-2
1_January_06_2014_28342453.wav	634-1271	syllable 2	58.66	57.584	595	3564.5	3338	664.67	25.491	0.0015	-1.935
1_January_06_2014_28817812.wav	1374-2020	syllable 2	62.57	54.957	595	3395	2667.9	612.11	20.531	0	-1.829
1_January_06_2014_29248750.wav	1257-1908	syllable 2	65.5	57.831	595	3398	3197	689.49	25.31	-0.007	-2.018
1_January_06_2014_29306500.wav	851-1492	syllable 2	61.9	56.367	595	3119.7	2681	706.04	23.164	-0.003	-2.141
1_January_06_2014_29437656.wav	1302-1935	syllable 2	62.537	55.069	583	3283	3241.4	574.77	27.595	0.0018	-2.18
1_January_06_2014_29800328.wav	2708-3350	syllable 2	58.6	59.196	589	3637	3880.3	451.84	33.062	-0.001	-1.585
		mean	61.4118	57.0403	591.9	3290.77	3068.19	647.108	25.7429	0.00042	-1.97005
		SD	2.94417	1.51288	6.18912	214.609	394.094	81.421	3.54913	0.00499922	0.211859
		C.V.	0.0479415	0.026523	0.0104564	0.0652154	0.128445	0.125823	0.137869	11.9029	-0.10754
1_January_06_2014_25277734.wav	1806-2459	syllable 3	53.7	44.705	621	790.84	105.55	168.45	15.588	0.0047	-1.622
1_January_06_2014_25353484.wav	2587-3184	syllable 3	36.96	44.661	595	658.61	105.58	141.27	9.2709	-0.013	-1.412
1_January_06_2014_25550390.wav	3219-3979	syllable 3	45.475	44.643	648	548.56	123.32	140.08	21.12	0.0036	-1.54
1_January_06_2014_25614015.wav	834-1473	syllable 3	55.723	45.703	612	954.35	210.71	147.43	17.65	-0.004	-1.6
1_January_06_2014_25984875.wav	3883-4532	syllable 3	47.731	45.506	630	848.54	244.94	172.56	25.158	-0.002	-1.536
1_January_06_2014_26149734.wav	3827-4472	syllable 3	41.744	43.672	565	412.95	106.58	137.29	9.3375	-0.014	-1.694
1_January_06_2014_26432687.wav	2913-3551	syllable 3	51.32	45.263	612	946.2	178.41	152.29	16.046	0.0022	-1.618
1_January_06_2014_26545843.wav	3800-4442	syllable 3	53.57	46.024	621	1483.7	935.27	189.34	28.716	0.0026	-1.749
1_January_06_2014_26901421.wav	1508-2153	syllable 3	45.825	44.766	537	674.59	123.04	125.04	16.466	0	-1.65
1_January_06_2014_27289890.wav	823-1462	syllable 3	42.142	44.402	640	537	108.16	137.41	15.823	-0.005	-1.426
1_January_06_2014_27705968.wav	1565-2216	syllable 3	53.17	45.903	612	1137.3	399.56	149.89	18.561	-0.004	-1.36
1_January_06_2014_27745312.wav	860-1504	syllable 3	60.61	46.819	630	1187.2	474.44	187.53	24.779	0.0003	-1.324
1_January_06_2014_27974781.wav	2151-2778	syllable 3	51.882	43.925	531	408	113.62	144.65	13.01	-0.008	-1.611
1_January_06_2014_28127031.wav	876-1514	syllable 3	47.891	45.714	603.5	994.12	119.11	166.78	19.225	-9.511	-1.487
1_January_06_2014_28342453.wav	634-1271	syllable 3	54.875	44.609	612	663	136.24	160.55	11.132	0.0021	-1.499
1_January_06_2014_28817812.wav	1374-2020	syllable 3	52.179	44.178	595	525.89	105.37	136.64	16.261	-0.009	-1.57
1_January_06_2014_29248750.wav	1257-1908	syllable 3	57.88	46.457	612	1455.4	747.99	175.67	24.131	0.0031	-1.357
1_January_06_2014_29306500.wav	851-1492	syllable 3	45.5	44.663	580	760.69	105.79	155.16	10.51	-0.006	-1.669
1_January_06_2014_29437656.wav	1302-1935	syllable 3	45.95	44.783	595	1164.6	720.16	161.75	18.424	0.0002	-1.645
1_January_06_2014_29800328.wav	2708-3350	syllable 3	45.25	46.467	689	1142.6	371.68	195.29	26.639	-0.003	-1.417
		mean	49.4688	45.1431	607.025	864.707	276.776	157.253	17.8924	-0.47801	-1.5393
		SD	5.97683	0.889034	36.0425	322.785	253.762	19.6784	5.78121	2.12615	0.12377
		C.V.	0.12082	0.0196937	0.0593757	0.373288	0.916849	0.125138	0.32311	-4.44792	-0.0804068
1_January_06_2014_25277734.wav	1806-2459	syllable 4	164.14	50.685	689	3167.1	2917.6	224.45	33.922	-0.005	-1.953
1_January_06_2014_25353484.wav	2587-3184	syllable 4	149.5	50.58	735	3283.8	2706.8	196.05	29.605	-0.007	-1.819
1_January_06_2014_25550390.wav	3219-3979	syllable 4	153.25	48.559	711	2544.4	1699.4	166.25	23.033	-0.003	-1.926
1_January_06_2014_25614015.wav	834-1473	syllable 4	158.3	51.291	700	3377.8	3057.9	244.58	37.44	-0.002	-1.735
1_January_06_2014_25984875.wav	3883-4532	syllable 4	164.52	50.026	587.5	2715.4	1751.3	195.12	30.348	-0.008	-1.705
1_January_06_2014_26149734.wav	3827-4472	syllable 4	159.59	48.192	648	2647.2	2345	174.26	25.75	0.0002	-1.794
1_January_06_2014_26432687.wav	2913-3551	syllable 4	160.3	49.76	711	2725.5	2187	196.06	29.454	-0.005	-1.974
1_January_06_2014_26545843.wav	3800-4442	syllable 4	160.23	50.586	711	2969.9	2523.1	220.76	37.47	-0.009	-1.782
1_January_06_2014_26901421.wav	1508-2153	syllable 4	153.75	49.552	711	2822.3	2004.6	181.07	26.798	-0.005	-1.879
1_January_06_2014_27289890.wav	823-1462	syllable 4	157.44	50.129	735	2843.5	2007.2	175.8	31.81	-0.002	-1.926
1_January_06_2014_27705968.wav	1565-2216	syllable 4	164.3	50.798	648	3250	2779.2	169.54	37.296	-0.003	-1.716
1_January_06_2014_27745312.wav	860-1504	syllable 4	165.6	52.222	848	3239.9	2929	207.06	41.03	-0.002	-1.946
1_January_06_2014_27974781.wav	2151-2778	syllable 4	157.77	49.766	711	3061.3	2664	179.16	27.701	-0.006	-1.991
1_January_06_2014_28127031.wav	876-1514	syllable 4	156.43	49.499	648	2584	1855.9	184.18	23.503	-0.004	-1.811
1_January_06_2014_28342453.wav	634-1271	syllable 4	156.52	50.243	670.5	3054.7	2406.1	158.06	30.512	-0.004	-1.937
1_January_06_2014_28817812.wav	1374-2020	syllable 4	165.6	49.477	668	3228.8	3062.4	162.9	32.922	-0.001	-1.915
1_January_06_2014_29248750.wav	1257-1908	syllable 4	158.59	52.573	723	3309.4	2962.8	224.27	38.324	-0.009	-1.782
1_January_06_2014_29306500.wav	851-1492	syllable 4	162.57	49.846	648	2864.6	1840	190.59	27.095	-0.005	-1.958
1_January_06_2014_29437656.wav	1302-1935	syllable 4	151.39	49.899	689	3015.2	2178.2	175.11	30.965	-0.004	-2.045
1_January_06_2014_29800328.wav	2708-3350	syllable 4	157.4	51.83	735	3021.4	2616.1	255.63	37.025	-0.01	-1.573
		mean	158.859	50.2757	696.35	2986.31	2424.68	194.045	31.6002	-0.00469	-1.85835
		SD	4.68316	1.10341	52.3425	257.495	460.145	27.4311	5.20744	0.00281086	0.119509
		C.V.	0.0294799	0.0219471	0.075167	0.0862251	0.189776	0.141365	0.164792	-0.599331	-0.0643091
1_January_06_2014_25277734.wav	1806-2459	syllable 5	121.2	53.204	551	3126.5	2486.4	623.29	27.865	-0.001	-1.831
1_January_06_2014_25353484.wav	2587-3184	syllable 5	112.74	53.628	565	3496.3	3016.9	566.59	27.716	0.0026	-1.783
1_January_06_2014_25550390.wav	3219-3979	syllable 5	117.3	52.069	551	3353.5	3347.1	521.17	31.274	0.0019	-1.898
1_January_06_2014_25614015.wav	834-1473	syllable 5	114.3	54.426	551	3396.5	2991.6	577.56	31.278	-0.002	-1.822
1_January_06_2014_25984875.wav	3883-4532	syllable 5	113.84	55.307	551	3686.9	3641	637.7	29.362	-0.003	-1.946
1_January_06_2014_26149734.wav	3827-4472	syllable 5	116.74	52.729	551	3287.2	3063.6	506.46	27.053	0.0002	-2.078
1_January_06_2014_26432687.wav	2913-3551	syllable 5	116.62	52.053	551	3096.4	2707.5	510.68	25.324	-0.001	-1.94
1_January_06_2014_26545843.wav	3800-4442	syllable 5	116.3	55.341	551	3487.2	3550.2	545.05	32.214	-0.001	-2.448
1_January_06_2014_26901421.wav	1508-2153	syllable 5	117.37	53.735	551	3556.4	3648.9	493.39	27.038	-0.001	-2.274
1_January_06_2014_27289890.wav	823-1462	syllable 5	110.44	54.308	551	3599.3	3501.9	446.28	27.199	0.0028	-2.185
1_January_06_2014_27705968.wav	1565-2216	syllable 5	120.52	53.028	551	3344	3265.9	567.67	26.081	0	-1.846
1_January_06_2014_27745312.wav	860-1504	syllable 5	117.53	54.89	551	3332	3321.9	710.04	34.108	0.0016	-1.841
1_January_06_2014_27974781.wav	2151-2778	syllable 5	112.66	54.694	551	3587.8	3547.9	480.96	29.166	0.0049	-2.247
1_January_06_2014_28127031.wav	876-1514	syllable 5	113.74	53.166	551	3627.8	3818.4	539.5	30.947	0.0033	-1.989
1_January_06_2014_28342453.wav	634-1271	syllable 5	119.83	52.721	551	3633.8	3796.4	480.91	29.399	0.0001	-1.964
1_January_06_2014_28817812.wav	1374-2020	syllable 5	115.7	54.797	551	3738.5	3609.7	477.93	29.717	-0.002	-2.313
1_January_06_2014_29248750.wav	1257-1908	syllable 5	115.52	56.924	551	3262.7	3119.7	681.09	27.437	0.006	-2.02
1_January_06_2014_29306500.wav	851-1492	syllable 5	114.74	54.171	551	3556.7	3358.8	604.03	31.921	0.0008	-1.87
1_January_06_2014_29437656.wav	1302-1935	syllable 5	109.5	54.262	551	3777.5	3698.2	540.37	30.201	0.003	-2.273
1_January_06_2014_29800328.wav	2708-3350	syllable 5	115.63	55.316	551	3564.3	3433.8	713.36	31.439	-0.007	-1.942
		mean	115.611	54.0384	551.7	3475.57	3346.29	561.202	29.337	0.00046	-2.0255
		SD	3.04093	1.24171	3.1305	193.052	357.732	78.6399	2.33232	0.00296584	0.196271
		C.V.	0.0263031	0.0229783	0.00567427	0.0555456	0.106904	0.140128	0.079501	6.44748	-0.0969
			Duration	Amplitude	Pitch	Mean freq	Peak_freq	Goodness	FM	AM	Entropy
	syllable 1	C.V.	0.0215671	0.0245539	0.0290784	0.0358123	0.0547904	0.145461	0.112223	4.46442	-0.0943541
	syllable 2	C.V.	0.0479415	0.026523	0.0104564	0.0652154	0.128445	0.125823	0.137869	11.9029	-0.10754
	syllable 3	C.V.	0.12082	0.0196937	0.0593757	0.373288	0.916849	0.125138	0.32311	-4.44792	-0.0804068
	syllable 4	C.V.	0.0294799	0.0219471	0.075167	0.0862251	0.189776	0.141365	0.164792	-0.599331	-0.0643091
	syllable 5	C.V.	0.0263031	0.0229783	0.00567427	0.0555456	0.106904	0.140128	0.079501	6.44748	-0.0969
		mean	0.0492223	0.0231392	0.0359503	0.123217	0.279353	0.135583	0.163499	3.55351	-0.088702

## Sheet: grey 146
song file-grey 146	duration-grey 146	syllable	Duration	Amplitude	Pitch	Mean freq	Peak_freq	Goodness	FM	AM	Entropy
2_December_28_2013_28796500	817-1742	S1	50.247	58.191	525	4814.8	4747.3	776.11	32.536	0.0136	-1.389
2_December_28_2013_29204437	1153-2097	S1	54.933	57.444	525	4847.6	4829.2	667.47	36.517	0.0005	-1.162
2_December_28_2013_29303546	2382-3328	S1	55.57	54.003	525	5488.2	5962.9	776.33	41.437	-0.007	-1.103
2_December_28_2013_29366500	2196-3154	S1	53.6	59.234	537	5112.9	5441.8	695.45	42.117	0.0081	-1.32
2_December_28_2013_29430578	2678-3713	S1	52.53	56.319	537	4198	4233.3	951.8	29.465	0.0136	-1.781
2_December_28_2013_29605781	555-1497	S1	54.945	59.115	525	4327.8	3931.2	602.12	40.301	0.0003	-0.9
2_December_28_2013_29733765	292-1243	S1	55.638	56.992	512	4760.1	4848.2	753.4	36.93	0.0073	-1.553
2_December_28_2013_29840421	3489-4423	S1	52.917	57.193	525	4746.5	4441.2	796.09	36.416	0.0114	-1.344
2_December_28_2013_29906000	321-1273	S1	55.95	55.904	525	4513.7	4301.2	724.01	38.422	0.0027	-1.282
2_December_28_2013_30255000	526-1421	S1	51.466	57.34	525	4521.4	4517.3	836.65	38.568	0.0072	-1.512
2_December_28_2013_30355875	1822-2782	S1	56.275	55.792	537	5258.6	5384.1	667.42	49.028	-0.008	-1.221
2_December_28_2013_30590203	949-1896	S1	50.925	57.06	525	4576.4	4528.5	744.6	35.815	0.0165	-1.372
2_December_28_2013_30727765	2113-3061	S1	49.16	54.642	537	5409.6	5645.5	704.09	37.642	0.0086	-1.407
2_December_28_2013_30660343	1622-2548	S1	50.586	54.54	525	4617.8	4244	952.52	37.292	0.015	-1.094
2_December_28_2013_31019921	2225-3162	S1	52.47	55.54	537	5057.5	5067.7	834.42	39.508	-0.002	-1.363
2_December_28_2013_34969343	1502-2433	S1	55.33	57.105	518.5	3693.8	3315.2	846.04	37.378	0.006	-1.683
2_December_28_2013_29440765	1621-2578	S1	54.26	56.169	525	3873.4	3383.7	749.86	26.963	0.0083	-1.718
2_December_28_2013_29632109	949-1882	S1	49.86	58.982	525	4675.8	4908.6	717.7	34.634	0.0129	-1.379
2_December_28_2013_30167406	610-1553	S1	52.11	55.521	537	4940.9	5120.7	659.48	39.251	0.0067	-1.437
2_December_28_2013_33339187	993-1937	S1	48.842	52.917	512	4766.7	5143	783.68	31.424	0	-1.334
	mean		52.8807	56.5002	526.975	4710.07	4699.73	761.962	37.0822	0.006085	-1.3677
	SD		2.41556	1.71029	7.8346	459.506	690.382	91.1633	4.7788	0.00704163	0.216909
	C.V.		0.0456794	0.0302706	0.0148671	0.0975582	0.146898	0.119643	0.12887	1.15721	-0.158594
2_December_28_2013_28796500	817-1742	S2	130.15	58.614	980	4447.2	4442.1	248.54	40.246	-0.001	-1.484
2_December_28_2013_29204437	1153-2097	S2	131.67	59.11	689	4661.2	4719.6	257.68	42.424	-0.003	-1.387
2_December_28_2013_29303546	2382-3328	S2	126.59	59.116	816	4882.7	4907.8	191.73	39.759	-0.003	-1.599
2_December_28_2013_29366500	2196-3154	S2	135.73	60.244	1050	4968.9	4975.7	224.6	42.691	-0.006	-1.327
2_December_28_2013_29430578	2678-3713	S2	132.88	57.313	630	4435.7	4510.9	230.72	41.932	-0.008	-1.842
2_December_28_2013_29605781	555-1497	S2	135.63	61.196	658	4679.8	4888.8	236.63	38.351	-0.003	-1.334
2_December_28_2013_29733765	292-1243	S2	128.17	60.016	1102	5065.6	4981	219.14	45.803	0.0037	-1.814
2_December_28_2013_29840421	3489-4423	S2	126.82	58.318	1102	4709.5	4549.7	218.09	46.447	-0.002	-1.369
2_December_28_2013_29906000	321-1273	S2	136.28	59.342	711	4631.1	4718.8	238.48	45.074	-0.001	-1.814
2_December_28_2013_30255000	526-1421	S2	131.7	59.319	918	4314	4221.8	236.03	40.291	-0.007	-1.717
2_December_28_2013_30355875	1822-2782	S2	137.92	57.756	1026	4480.1	4529.8	245.04	42.61	-0.014	-1.743
2_December_28_2013_30590203	949-1896	S2	136.98	57.203	1102	4876.3	4846.8	214.71	45.27	-0.008	-1.421
2_December_28_2013_30727765	2113-3061	S2	129.97	55.488	773.5	5556.9	5734	270.76	42.097	-0.003	-1.65
2_December_28_2013_30660343	1622-2548	S2	125.83	57.077	882	5210.9	5174.9	234.49	44.076	0.0035	-1.874
2_December_28_2013_31019921	2225-3162	S2	133.36	58.271	1050	4535.3	4648.1	237.14	46.105	-0.001	-1.564
2_December_28_2013_34969343	1502-2433	S2	132.69	59.819	852.5	4707.2	4730.1	268.8	42.385	0	-1.729
2_December_28_2013_29440765	1621-2578	S2	131.7	56.799	668	4406.7	4394.4	241.29	40.393	-0.004	-1.886
2_December_28_2013_29632109	949-1882	S2	133.6	59.038	1102	4872.1	4938.5	244.36	44.58	-0.004	-1.399
2_December_28_2013_30167406	610-1553	S2	128.93	59.201	1102	4273.7	4335.3	218.38	40.078	0	-2.01
2_December_28_2013_33339187	993-1937	S2	130.27	56.788	760	5031.9	4947.2	214.95	40.264	-0.006	-1.73
	mean		131.843	58.5014	898.7	4737.34	4759.77	234.578	42.5438	-0.00334	-1.63465
	SD		3.55049	1.41281	175.072	325.287	341.038	19.1808	2.41813	0.00412201	0.211822
	C.V.		0.0269296	0.0241501	0.194806	0.0686644	0.0716501	0.0817674	0.0568387	-1.23413	-0.129583
2_December_28_2013_28796500	817-1742	S3	76.1	52.356	918	3619.6	3506.9	239.01	45.711	0.0051	-1.776
2_December_28_2013_29204437	1153-2097	S3	73.48	52.742	711	4154.9	4320.5	234.27	44.977	0.0005	-1.517
2_December_28_2013_29303546	2382-3328	S3	77.29	50.507	668	4438.3	4437.5	246.77	41.424	-0.005	-1.309
2_December_28_2013_29366500	2196-3154	S3	76.85	53.009	816	4219.5	4167.7	326.42	46.102	-0.011	-1.372
2_December_28_2013_29430578	2678-3713	S3	80.832	51.381	630	3946.5	3973	343.82	42.029	-0.007	-1.87
2_December_28_2013_29605781	555-1497	S3	76.264	55.018	787	3745.3	3584.7	316.71	48.927	0.0035	-1.553
2_December_28_2013_29733765	292-1243	S3	77.491	52.161	630	3991.3	3956.4	223.57	34.463	0	-1.727
2_December_28_2013_29840421	3489-4423	S3	75.39	52.86	612	3920.1	3768.6	276.49	41.804	0.002	-1.564
2_December_28_2013_29906000	321-1273	S3	78.936	52.912	787	4097	4131.3	282.14	39.542	0	-1.908
2_December_28_2013_30255000	526-1421	S3	74.294	53.542	711	4000.9	4280.6	274.84	50.03	0.0006	-1.941
2_December_28_2013_30355875	1822-2782	S3	66.371	52.271	691.5	4066.1	3960.8	315.37	44.895	0.0022	-1.607
2_December_28_2013_30590203	949-1896	S3	79.8	51.398	668	4478.4	4541.7	256.46	43.629	0.0004	-1.393
2_December_28_2013_30727765	2113-3061	S3	73.27	51.097	630	4963.5	4887.7	237.16	43.698	-0.003	-1.344
2_December_28_2013_30660343	1622-2548	S3	71.39	50.918	648	5056.4	5256.9	218.07	39.74	0.0055	-1.527
2_December_28_2013_31019921	2225-3162	S3	68.66	51.632	711	3774.6	3826.4	245.55	45.008	0.0004	-1.365
2_December_28_2013_34969343	1502-2433	S3	74.8	52.235	747.5	3759.9	3755.8	304.83	47.84	0.0057	-1.949
2_December_28_2013_29440765	1621-2578	S3	79.69	52.09	630	3874.5	3678.1	280.62	42.656	-0.012	-1.937
2_December_28_2013_29632109	949-1882	S3	71.436	53.145	580	4137.1	4013.1	375.94	46.617	0.0067	-1.57
2_December_28_2013_30167406	610-1553	S3	68.793	54.224	668	4205.5	4373.1	281.62	48.804	0	-1.919
2_December_28_2013_33339187	993-1937	S3	72.385	51.09	689	4521.9	4587.2	223.22	39.965	0.0053	-1.564
	mean		74.6761	52.3294	696.65	4148.57	4150.4	275.144	43.8931	-5e-06	-1.6356
	SD		3.98596	1.1454	81.5075	382.947	445.916	44.08	3.82397	0.00529026	0.224918
	C.V.		0.0533767	0.0218883	0.116999	0.0923083	0.107439	0.160207	0.0871203	-1058.05	-0.137514
2_December_28_2013_28796500	817-1742	S4	52.163	57.022	525	4128.7	4007.7	945.78	35.02	-0.004	-1.477
2_December_28_2013_29204437	1153-2097	S4	49.72	57.082	537	4925.8	5060.7	1021.78	42.225	0.0034	-1.276
2_December_28_2013_29303546	2382-3328	S4	50.17	56.866	525	4601.2	4641	748.4	41.021	-0.007	-1.359
2_December_28_2013_29366500	2196-3154	S4	56.379	56.836	525	4811	4796	782.47	46.698	-0.022	-1.041
2_December_28_2013_29430578	2678-3713	S4	52.824	55.977	537	3847.7	3404.8	989.15	33.412	0.0038	-1.83
2_December_28_2013_29605781	555-1497	S4	61.772	58.362	525	4176.8	4294	752.63	45.546	-0.024	-1.069
2_December_28_2013_29733765	292-1243	S4	55.583	56.456	537	5176.5	5462.5	810.5	52.007	-0.008	-1.3
2_December_28_2013_29840421	3489-4423	S4	47.936	57.227	551	4684.8	4995.7	954.14	45.678	-0.011	-1.303
2_December_28_2013_29906000	321-1273	S4	54.274	55.654	525	4713.6	4819.3	797.98	38.158	-0.019	-1.458
2_December_28_2013_30255000	526-1421	S4	53.163	57.43	537	4947	5072.3	1044.19	33.455	0.0133	-1.459
2_December_28_2013_30355875	1822-2782	S4	49.86	57.569	525	5297.8	5465.9	1164.3	32.794	0.003	-1.403
2_December_28_2013_30590203	949-1896	S4	50.1	55.996	512	4755.1	4855.3	1095.81	37.32	0.0109	-1.256
2_December_28_2013_30727765	2113-3061	S4	51.48	54.808	525	5050.2	5151.2	1081.65	33.246	0.0044	-1.449
2_December_28_2013_30660343	1622-2548	S4	52.94	54.751	525	4834.8	5220.1	874.81	43.21	-0.005	-1.35
2_December_28_2013_31019921	2225-3162	S4	52.187	56.4	525	4032	3601.8	977.96	36.167	0.0023	-1.164
2_December_28_2013_34969343	1502-2433	S4	48.47	57.451	525	4173.7	4146.6	961.82	38.528	0.011	-1.683
2_December_28_2013_29440765	1621-2578	S4	56.26	54.85	525	3727.4	3329.6	870.39	39.386	-0.011	-1.782
2_December_28_2013_29632109	949-1882	S4	51.493	58.475	525	4483	4842.7	1178.1	37.628	0.0032	-1.513
2_December_28_2013_30167406	610-1553	S4	56.3	56.103	525	4382.5	4387.8	935.18	50.318	-0.018	-1.63
2_December_28_2013_33339187	993-1937	S4	54.593	54.001	525	4526.2	4736.4	974.42	40.598	-0.013	-1.472
	mean		52.8834	56.4658	528.05	4563.79	4614.57	948.073	40.1208	-0.004335	-1.4137
	SD		3.32178	1.21276	8.06209	439.228	638.025	128.969	5.69798	0.0112875	0.211142
	C.V.		0.0628133	0.0214778	0.0152677	0.0962419	0.138263	0.136033	0.142021	-2.60381	-0.149354
2_December_28_2013_28796500	817-1742	S5	76.437	56.912	612	3961.6	4157.3	989.27	24.898	0.0002	-1.798
2_December_28_2013_29204437	1153-2097	S5	81.9	55.56	612	3659.2	4129.4	882.73	28.259	-0.001	-1.826
2_December_28_2013_29303546	2382-3328	S5	78.587	56.177	580	4023	4168.2	1023.7	25.133	0.0045	-1.851
2_December_28_2013_29366500	2196-3154	S5	79.818	56.538	595	4712	4921.4	949.1	28.182	0	-1.704
2_December_28_2013_29430578	2678-3713	S5	81.65	53.458	612	4048.4	4138.1	807.03	27.888	-0.011	-2.21
2_December_28_2013_29605781	555-1497	S5	79.9	59.91	595	3803.5	3690.8	1184.6	25.711	0.0063	-2.182
2_December_28_2013_29733765	292-1243	S5	78.857	55.061	595	4044.8	4408.7	1038.2	26.095	0.0063	-1.768
2_December_28_2013_29840421	3489-4423	S5	80.632	55.629	612	3800.1	3675	853.65	25.343	-0.014	-1.869
2_December_28_2013_29906000	321-1273	S5	77.92	54.736	612	3555	3624.9	984.95	23.736	-0.001	-2.03
2_December_28_2013_30255000	526-1421	S5	76.37	56.694	612	4148.7	4215.4	974.79	24.435	-0.001	-2.056
2_December_28_2013_30355875	1822-2782	S5	80.926	54.036	595	3979.4	4234.6	947.8	21.932	-0.008	-2.048
2_December_28_2013_30590203	949-1896	S5	79.9	54.31	595	3895.1	4315.4	906.21	28.505	-0.007	-2.012
2_December_28_2013_30727765	2113-3061	S5	71.58	51.378	595	4442.2	4315.7	973.76	23.394	0	-2.034
2_December_28_2013_30660343	1622-2548	S5	76.37	53.52	612	4177.7	4292.8	955.47	27.324	-0.008	-1.949
2_December_28_2013_31019921	2225-3162	S5	77.2	54.47	595	4030.8	4400.9	886.68	26.529	-0.007	-1.792
2_December_28_2013_34969343	1502-2433	S5	78.11	55.936	612	4060.6	4667.6	738.92	26.428	0.0019	-1.753
2_December_28_2013_29440765	1621-2578	S5	77.39	55.016	595	4088.1	4044.1	939.05	24.323	0.0095	-2.33
2_December_28_2013_29632109	949-1882	S5	75.7	57.517	580	4524.9	4660.9	1063.1	31.425	0.0001	-1.856
2_December_28_2013_30167406	610-1553	S5	76.48	55.174	595	3837.6	4086.6	1005.2	26.1	-0.005	-2.503
2_December_28_2013_33339187	993-1937	S5	75.836	53.316	595	4182.6	4264.1	837.52	25.187	0.0063	-1.904
	mean		78.0781	55.2674	600.3	4048.77	4220.6	947.087	26.0414	-0.001395	-1.97375
	SD		2.48988	1.82365	10.761	277.845	323	98.7814	2.15461	0.00634661	0.20796
	C.V.		0.0318896	0.0329968	0.0179261	0.0686246	0.0765295	0.1043	0.082738	-4.54954	-0.105363
2_December_28_2013_28796500	817-1742	S6	64.22	50.232	551	4029.8	3679.3	358.25	42.32	0.0067	-1.18
2_December_28_2013_29204437	1153-2097	S6	70.581	48.482	580	3867.4	4133	433.87	40.143	-0.004	-1.375
2_December_28_2013_29303546	2382-3328	S6	62.368	48.559	537	3772.1	4011.4	373.8	41.69	0.0074	-1.431
2_December_28_2013_29366500	2196-3154	S6	77.475	50.308	565	4149.4	3789.8	480.44	48.95	-0.005	-1.197
2_December_28_2013_29430578	2678-3713	S6	58.32	47.032	551	4178.3	4205.5	460.07	54.867	-0.004	-1.754
2_December_28_2013_29605781	555-1497	S6	71.8	50.641	580	3264.7	3295.8	472.83	46.039	-0.005	-1.662
2_December_28_2013_29733765	292-1243	S6	61.93	48.97	545	3431.2	3126.9	336.64	42.668	-0.01	-1.518
2_December_28_2013_29840421	3489-4423	S6	65.185	49.203	587.5	3491.5	3640.2	499.93	42.92	0.0028	-1.82
2_December_28_2013_29906000	321-1273	S6	60.462	48.241	580	3849.7	3939.8	388.87	48.874	-0.001	-1.572
2_December_28_2013_30255000	526-1421	S6	51.49	49.08	565	3617.8	3515.7	366.61	44.451	0	-1.708
2_December_28_2013_30355875	1822-2782	S6	60.2	48.215	580	2585.4	1932.1	340.31	27.862	0.0022	-1.764
2_December_28_2013_30590203	949-1896	S6	65.597	47.025	537	4015.3	3959.8	395.24	40.712	-0.002	-1.267
2_December_28_2013_30727765	2113-3061	S6	44.21	44.339	558	4417.9	4539.8	382.29	50.795	-0.008	-1.626
2_December_28_2013_30660343	1622-2548	S6	49.86	45.927	612	4547.1	4691.2	361.63	48.934	0	-1.693
2_December_28_2013_31019921	2225-3162	S6	67.4	47.979	501	3443.2	3359.1	424.79	44.177	-0.005	-1.429
2_December_28_2013_34969343	1502-2433	S6	59.638	47.052	580	3807.8	3789	358.65	45.758	0.0009	-1.596
2_December_28_2013_29440765	1621-2578	S6	63.475	48.536	603.5	4496.2	4611.6	382.68	57.285	-0.002	-1.698
2_December_28_2013_29632109	949-1882	S6	65.39	49.945	551	4409.1	4693.5	421.92	42.954	-0.004	-1.299
2_December_28_2013_30167406	610-1553	S6	60.29	48.847	572.5	4119.9	4483.4	432.34	52.147	-0.014	-1.83
2_December_28_2013_33339187	993-1937	S6	48.573	45.917	565	5194.2	5495.6	277.03	50.421	-0.004	-1.179
	mean		61.4232	48.2265	565.075	3934.4	3944.62	397.409	45.6984	-0.0024	-1.5299
	SD		8.12965	1.62343	25.2145	562.242	746.899	55.5872	6.36219	0.00516027	0.220234
	C.V.		0.132355	0.0336626	0.0446215	0.142904	0.189346	0.139874	0.139221	-2.15011	-0.143953
2_December_28_2013_28796500	817-1742	S7	47.26	52.68	565	4152.1	3876.9	625.1	48.453	0.0019	-0.907
2_December_28_2013_29204437	1153-2097	S7	52.19	52.865	580	4492.1	3641.9	607.13	46.119	-0.012	-0.989
2_December_28_2013_29303546	2382-3328	S7	58.334	51.685	580	5897	6287.6	346.59	42.685	-0.013	-1.062
2_December_28_2013_29366500	2196-3154	S7	53.826	54.754	551	6125	6346.6	695.17	41.619	0.0034	-1.062
2_December_28_2013_29430578	2678-3713	S7	46.474	49.532	551	4604.9	4632.1	506.39	35.29	-0.016	-0.948
2_December_28_2013_29605781	555-1497	S7	57.37	54.196	537	5029.5	4320.4	798.32	42.343	-0.004	-0.92
2_December_28_2013_29733765	292-1243	S7	54.82	51.773	518.5	4603.5	4729.3	635	48.191	-0.004	-0.968
2_December_28_2013_29840421	3489-4423	S7	50.25	52.429	580	4711.9	5195.3	683.81	49.715	-0.004	-1.015
2_December_28_2013_29906000	321-1273	S7	52.46	50.728	551	4136.6	4277.6	530.24	45.926	-0.027	-1.09
2_December_28_2013_30255000	526-1421	S7	53.363	49.88	537	4617.2	4024.2	699.56	38.355	-0.017	-0.946
2_December_28_2013_30355875	1822-2782	S7	43.9	52.811	565	4827.3	5389.4	578.88	38.752	0.0095	-1.035
2_December_28_2013_30590203	949-1896	S7	56.722	51.814	565	6001.2	6468.7	566.12	47.479	-0.018	-1.024
2_December_28_2013_30727765	2113-3061	S7	44.385	50.492	551	6543	6644.8	506.7	43.643	0.0007	-1.204
2_December_28_2013_30660343	1622-2548	S7	46.9	49.399	580	6300.1	7010.5	414.69	37.867	-0.004	-0.916
2_December_28_2013_31019921	2225-3162	S7	47.66	50.165	544	5198.3	4739.1	720.03	46.789	-0.017	-0.775
2_December_28_2013_34969343	1502-2433	S7	42.725	51.264	565	5215.6	4826.9	627.13	48.589	-0.017	-0.86
2_December_28_2013_29440765	1621-2578	S7	50.365	53.164	537	6428.8	6596.9	528.42	34.735	0.0008	-1.273
2_December_28_2013_29632109	949-1882	S7	50.88	53.148	551	5854.3	6399.3	671.05	59.053	-0.018	-0.83
2_December_28_2013_30167406	610-1553	S7	49.47	50.755	565	4851.2	4418.2	565.14	38.434	-0.016	-1.002
2_December_28_2013_33339187	993-1937	S7	49.96	51.464	565	6968.5	6861.9	605.53	47.733	0.0045	-1.163
	mean		50.4657	51.7499	556.925	5327.91	5334.38	595.55	44.0885	-0.00831	-0.99945
	SD		4.48735	1.50535	17.062	859.726	1123.69	106.593	5.89176	0.00994373	0.123229
	C.V.		0.0889189	0.0290889	0.0306361	0.161363	0.210651	0.178983	0.133635	-1.1966	-0.123297
2_December_28_2013_28796500	817-1742	S8	188.7	53.999	595	4326.2	4538	578.21	35.18	0.0023	-1.57
2_December_28_2013_29204437	1153-2097	S8	202.58	52.485	612	3953.8	4167.2	585.33	29.867	0.001	-1.885
2_December_28_2013_29303546	2382-3328	S8	199.24	51.476	612	4952.6	4918.7	489.34	37.727	0.001	-1.558
2_December_28_2013_29366500	2196-3154	S8	194.35	52.573	648	4610.6	4919.4	556.34	39.475	-0.004	-1.424
2_December_28_2013_29430578	2678-3713	S8	196.39	50.542	612	4433.2	4668.3	493.75	37.105	-0.006	-1.703
2_December_28_2013_29605781	555-1497	S8	188.57	55.196	648	4627.8	4895.2	542.91	38.549	0	-1.296
2_December_28_2013_29733765	292-1243	S8	194.8	51.713	630	3835.3	3731.5	501.67	36.454	0.0011	-1.588
2_December_28_2013_29840421	3489-4423	S8	187.57	52.947	621	4092.3	4146	556.36	33.769	0.0005	-1.515
2_December_28_2013_29906000	321-1273	S8	195.3	52.873	648	4469.3	4497.9	512.43	37.314	0.0014	-1.814
2_December_28_2013_30255000	526-1421	S8	194.49	51.509	648	4266.9	4193.9	523.78	36.345	-0.002	-1.639
2_December_28_2013_30355875	1822-2782	S8	203.33	51.905	648	3884.4	3469	477.2	29.896	-0.002	-1.724
2_December_28_2013_30590203	949-1896	S8	196.95	50.161	648	3973.2	4015.9	502.13	35.384	0	-1.599
2_December_28_2013_30727765	2113-3061	S8	197.55	48.567	630	4461.9	4414.1	584.14	32.318	-0.004	-1.582
2_December_28_2013_30660343	1622-2548	S8	189.82	48.152	630	4140.8	4154	501.94	31.814	-0.005	-1.706
2_December_28_2013_31019921	2225-3162	S8	196.33	50.539	648	3695.7	3544.7	513.65	35.832	0.0006	-1.554
2_December_28_2013_34969343	1502-2433	S8	199.4	51.302	630	3994.7	4209.5	537.51	32.425	-0.002	-1.734
2_December_28_2013_29440765	1621-2578	S8	203.63	51.002	595	4553.5	4534	534.26	32.598	-0.003	-1.749
2_December_28_2013_29632109	949-1882	S8	202.88	54.365	630	4600.8	4781	626.72	36.603	-0.003	-1.482
2_December_28_2013_30167406	610-1553	S8	193.72	51.287	648	4223.5	4150.4	503.95	38.328	0.0022	-1.633
2_December_28_2013_33339187	993-1937	S8	190.96	49.587	612	4698.2	4788.3	473.17	36.844	0.0009	-1.615
	mean		195.828	51.609	629.65	4289.74	4336.85	529.739	35.1913	-0.001	-1.6185
	SD		5.04137	1.80094	18.377	337.44	437.217	41.0037	2.8526	0.00251019	0.135759
	C.V.		0.0257439	0.0348959	0.029186	0.0786623	0.100814	0.0774036	0.0810598	-2.51019	-0.0838794
	C.V.	syllable	Duration	Amplitude	Pitch	Mean freq	Peak_freq	Goodness	FM	AM	Entropy
		S1	0.0456794	0.0302706	0.0148671	0.0975582	0.146898	0.149201	0.12887	1.15721	-0.158594
		S2	0.0269296	0.0241501	0.194806	0.0686644	0.0716501	0.0817674	0.0568387	-1.23413	-0.129583
		S3	0.0533767	0.0218883	0.116999	0.0923083	0.107439	0.160207	0.0871203	-1058.05	-0.137514
		S4	0.0628133	0.0214778	0.0152677	0.0962419	0.138263	0.152073	0.142021	-2.60381	-0.149354
		S5	0.0318896	0.0329968	0.0179261	0.0686246	0.0765295	0.1043	0.082738	-4.54954	-0.105363
		S6	0.132355	0.0336626	0.0446215	0.142904	0.189346	0.139874	0.139221	-2.15011	-0.143953
		S7	0.0889189	0.0290889	0.0306361	0.161363	0.210651	0.178983	0.133635	-1.1966	-0.123297
		S8	0.0257439	0.0348959	0.029186	0.0786623	0.100814	0.0774036	0.0810598	-2.51019	-0.0838794
		mean	0.0584633	0.0285539	0.0580387	0.100791	0.130199	0.130476	0.106438	-133.892	-0.128942

## Sheet: grey 180
song files	duration	syllable	Duration	Amplitude	Pitch	Mean freq	Peak_freq	Goodness	FM	AM	Entropy
4_February_25_2014_31163140	2458-3263	S1	56.257	58.718	525	3803.6	3863.4	785.86	38.323	0.0163	-1.747
4_February_25_2014_32555062	1602-2420	S1	55.363	59.419	512	4075.9	3667.5	763.32	31.089	0.0444	-1.427
4_February_25_2014_32637312	731-1546	S1	55.33	56.427	512	3411.4	2996.3	876.95	34.318	0.0046	-2.508
4_February_25_2014_34187781	1171-1973	S1	51.82	56.399	525	3480.2	3251.9	949.42	29.688	0.0231	-2.382
4_February_25_2014_35801078	217-1025	S1	54.75	56.381	525	3976.5	3825.5	923.45	35.39	0.0103	-2.167
4_February_25_2014_35806187	1737-2573	S1	58.376	58.529	512	3898.3	3732.6	623.09	36.818	0.0027	-1.558
4_February_25_2014_35889625	3926-4745	S1	54.85	55.462	512	3531	3012.1	993.8	29.252	0.017	-2.205
4_February_25_2014_35961265	3857-4676	S1	54.5	55.837	512	4059.4	4132.7	1055	32.532	0.0198	-2.09
4_February_25_2014_36015109	3698-4513	S1	53.7	56.49	501	3993.6	4046.5	941.74	31.788	0.0272	-2.205
4_February_25_2014_36020187	277-1054	S1	55.583	54.825	512	3330.2	3003.4	983.3	29.857	-0.001	-2.15
4_February_25_2014_36320234	565-1383	S1	52.89	56.203	512	3981.9	3836.2	1163.9	28.803	0.0196	-2.191
4_February_25_2014_36819593	509-1319	S1	52.9	55.896	512	3650.1	3258.4	1109.1	29.145	0.0205	-2.341
4_February_25_2014_36854203	1095-1927	S1	53.77	56.094	512	3541.5	3040.9	886.12	34.149	0.0085	-2.073
4_February_25_2014_38315750	1078-1879	S1	50.984	57.09	512	3208.7	3115.4	815.87	32.666	0.0184	-2.869
4_February_25_2014_38735406	3491-4297	S1	55.73	54.442	525	3396.6	3058.5	860.35	33.503	-0.003	-2.204
4_February_25_2014_38772359	2028-2853	S1	50.72	57.376	525	3945.7	4012	824.36	31.633	0.0385	-2.137
4_February_25_2014_38919687	2767-3582	S1	57.168	58.74	512	3871.8	3582.7	724.71	32.115	0.0186	-1.794
4_February_25_2014_38924765	2584-3432	S1	56.287	59.169	525	3925.4	3795.9	671.66	40.023	0.006	-1.338
4_February_25_2014_39042281	2197-3022	S1	49.686	55.125	512	3387.3	3037	989.7	23.324	0.0197	-2.348
4_February_25_2014_39085781	2268-3102	S1	56.817	57.054	518.5	4279.6	4434.2	929.94	39.286	0.0181	-2.104
		mean	54.374	56.7838	515.675	3737.43	3535.15	893.582	32.6851	0.016465	-2.0919
		S.D.	3.77367	1.4619	6.90971	304.957	456.704	139.987	4.02549	0.0119413	0.366459
		C.V.	0.0690826	0.025745	0.0133993	0.181595	0.129189	0.156658	0.12316	0.725252	-0.17518
4_February_25_2014_31163140	2458-3263	S2	43.19	55.745	580	3224	2252.1	615.73	53.209	-0.014	-1.001
4_February_25_2014_32555062	1602-2420	S2	37.13	56.838	595	3358.7	2765.8	793.67	50.169	0.0044	-0.89
4_February_25_2014_32637312	731-1546	S2	37.37	53.559	595	3985.1	3831.7	364.07	54.354	0.0016	-1.039
4_February_25_2014_34187781	1171-1973	S2	34.92	55.282	595	3456.3	2709.4	447.37	45.045	0.0065	-1.039
4_February_25_2014_35801078	217-1025	S2	37.63	54.897	612	3851.4	3067.9	424.11	51.605	-0.01	-1.036
4_February_25_2014_35806187	1737-2573	S2	42.92	55.044	580	3421.4	3001.6	664.82	53.667	-0.024	-0.903
4_February_25_2014_35889625	3926-4745	S2	40.07	53.858	595	4207.1	3745.5	506.91	39.864	0.0155	-1.026
4_February_25_2014_35961265	3857-4676	S2	41.94	53.673	595	3246.7	2706.8	402.85	48.982	-0.005	-1.068
4_February_25_2014_36015109	3698-4513	S2	39.99	51.91	580	3692.2	2523.2	452.77	52.771	-0.02	-0.948
4_February_25_2014_36020187	277-1054	S2	37.33	54.113	565	3357.2	2697.6	557.19	46.949	0.0161	-1.021
4_February_25_2014_36320234	565-1383	S2	41.04	53.712	595	3096.9	2396.6	468.78	45.257	0.0005	-1.082
4_February_25_2014_36819593	509-1319	S2	39.429	52.9	558	3483.2	2900.5	523.06	46.07	-0.011	-1.156
4_February_25_2014_36854203	1095-1927	S2	41.634	54.527	595	3959.9	3387.8	495.26	50.213	0.0166	-0.988
4_February_25_2014_38315750	1078-1879	S2	38.711	53.108	595	3560.1	2927.3	435.88	51.462	-0.006	-1.218
4_February_25_2014_38735406	3491-4297	S2	36.96	53.291	580	2954.9	2593.2	421.51	43.924	0.0118	-1.093
4_February_25_2014_38772359	2028-2853	S2	38.901	54.084	580	2946.3	2470.6	496.49	40.71	0.0081	-1.191
4_February_25_2014_38919687	2767-3582	S2	42.875	55.761	595	3483.1	3302.7	571.37	44.84	-0.006	-0.913
4_February_25_2014_38924765	2584-3432	S2	43.19	54.936	612	3002.4	2362.7	673.5	52.563	0.0015	-1.105
4_February_25_2014_39042281	2197-3022	S2	37.13	51.751	580	3282.2	2806.3	430.77	49.616	0.0032	-1.028
4_February_25_2014_39085781	2268-3102	S2	43.279	52.79	595	3120.8	2444.9	508.78	46.236	-0.012	-1.059
		mean	39.782	54.0889	588.85	3434.5	2844.71	512.745	48.3753	-0.00111	-1.0402
		S.D.	2.6041	1.30902	13.4567	356.845	440.816	106.974	4.28389	0.0118458	0.0884633
		C.V.	0.0659215	0.0242012	0.0228524	0.1039	0.20996	0.13963	0.0885553	-10.6719	-0.0850445
4_February_25_2014_31163140	2458-3263	S3	74.129	63.141	565	3456.4	3301.7	651.88	27.313	-0.002	-0.991
4_February_25_2014_32555062	1602-2420	S3	77.33	61.693	565	3911.3	3620.8	821.34	27.402	-0.007	-1.525
4_February_25_2014_32637312	731-1546	S3	74.229	59.282	595	3993.5	3230.5	982.7	23.845	0.0127	-2.655
4_February_25_2014_34187781	1171-1973	S3	69.441	60.658	580	2269.3	2565.5	946.33	22.287	-0.004	-2.882
4_February_25_2014_35801078	217-1025	S3	74.829	59.564	580	3320.6	2831.1	828.53	24.15	0.0075	-2.618
4_February_25_2014_35806187	1737-2573	S3	81.814	62.587	580	3728.7	3968.7	849.31	26.611	0.0055	-1.66
4_February_25_2014_35889625	3926-4745	S3	70.29	58.185	580	3085.3	2869.7	953.99	21.197	0.0109	-2.626
4_February_25_2014_35961265	3857-4676	S3	77.23	60.22	580	2683.1	2849.4	1048.4	20.235	0.006	-2.405
4_February_25_2014_36015109	3698-4513	S3	71.86	58.766	580	2512.2	2667	806.33	22.677	0.01	-2.443
4_February_25_2014_36020187	277-1054	S3	76.25	58.778	580	2751.9	2853.4	968.77	20.747	0.0035	-2.706
4_February_25_2014_36320234	565-1383	S3	71.723	59.03	580	2555.6	2390.7	995.07	19.886	0.0077	-2.608
4_February_25_2014_36819593	509-1319	S3	78.16	58.45	580	4221.1	3523.2	946.74	24.509	0.001	-2.799
4_February_25_2014_36854203	1095-1927	S3	76.83	58.521	580	2983.3	2778.3	1028.8	20.032	0.0091	-2.384
4_February_25_2014_38315750	1078-1879	S3	74.34	57.459	580	3995.7	3279.4	770.32	24.324	-0.019	-2.688
4_February_25_2014_38735406	3491-4297	S3	74.13	58.684	580	3213.9	3322	882.24	20.936	0.0056	-2.546
4_February_25_2014_38772359	2028-2853	S3	73.29	60.837	580	2991.3	3697.3	969.72	19.447	0.0001	-2.29
4_February_25_2014_38919687	2767-3582	S3	74.129	61.877	565	2863.5	3825.4	997.81	25.644	0.0052	-1.579
4_February_25_2014_38924765	2584-3432	S3	85.23	62.221	580	3574.4	3413.1	984.42	21.758	0.004	-1.58
4_February_25_2014_39042281	2197-3022	S3	73.832	57.041	580	3105.7	2687.5	831.95	20.667	0.0018	-2.676
4_February_25_2014_39085781	2268-3102	S3	78.352	60.119	580	4152.1	2897.9	1059.5	24.632	-0.001	-2.536
		mean	75.3709	59.8556	578.5	3268.45	3128.63	916.207	22.915	0.00288	-2.30985
		S.D.	3.74288	1.74945	6.7082	588.157	450.058	106.171	2.57063	0.00725734	0.532502
		C.V.	0.0496595	0.0292278	0.0115959	0.17995	0.143852	0.11588	0.112182	2.51991	-0.230536
4_February_25_2014_31163140	2458-3263	S4	72.234	56.771	689	3828.3	3956.2	492.05	49.645	-0.021	-2.406
4_February_25_2014_32555062	1602-2420	S4	70.875	55.167	711	3801.6	3687.9	545.67	38.114	-0.007	-2.148
4_February_25_2014_32637312	731-1546	S4	65.5	52.159	711	4347.8	4333.3	395.72	44.874	-0.019	-2.389
4_February_25_2014_34187781	1171-1973	S4	67.385	53.952	711	4168.4	4103.5	368.62	36.574	-0.019	-2.385
4_February_25_2014_35801078	217-1025	S4	75.89	52.359	689	4006.8	4018.5	359.71	33.88	-0.021	-2.425
4_February_25_2014_35806187	1737-2573	S4	66.88	55.229	689	3742.4	3784.7	584.46	34.38	-0.037	-2.246
4_February_25_2014_35889625	3926-4745	S4	64.73	51.574	700	3797.4	3463.9	439.77	56.759	-0.002	-2.265
4_February_25_2014_35961265	3857-4676	S4	62.48	53.352	689	3698.8	3570.6	451.65	53.641	-0.027	-2.277
4_February_25_2014_36015109	3698-4513	S4	72.54	50.045	711	3366.9	2970.3	407.22	36.629	-0.005	-2.119
4_February_25_2014_36020187	277-1054	S4	73.82	50.848	689	3676.4	3550	418.72	62.86	-0.021	-2.236
4_February_25_2014_36320234	565-1383	S4	67.45	52.932	689	3916.9	3874.7	421.61	59.699	-0.027	-2.275
4_February_25_2014_36819593	509-1319	S4	76.41	51.479	689	3394.7	3070.6	372.8	34.232	-0.017	-2.466
4_February_25_2014_36854203	1095-1927	S4	69.84	52.954	689	4151.4	3906.7	437.9	53.578	-0.037	-2.307
4_February_25_2014_38315750	1078-1879	S4	67.54	50.127	711	4047.5	4043	301.77	35.496	-0.008	-2.517
4_February_25_2014_38735406	3491-4297	S4	67.45	50.394	700	3731	3403.5	361.2	33.05	-0.011	-2.395
4_February_25_2014_38772359	2028-2853	S4	67.89	53.004	689	4023.7	3846.8	402.27	58.989	-0.032	-2.377
4_February_25_2014_38919687	2767-3582	S4	65.81	55.484	711	3841.5	3980.5	535.34	49.151	-0.008	-2.177
4_February_25_2014_38924765	2584-3432	S4	67.645	54.138	689	3581.9	3527.6	470.28	36.788	-0.04	-2.433
4_February_25_2014_39042281	2197-3022	S4	67.85	50.136	711	4105.9	3947.5	260.5	34.149	-0.012	-2.464
4_February_25_2014_39085781	2268-3102	S4	72.74	53.435	689	4048.2	4085.4	462.38	47.726	-0.022	-2.379
		mean	69.1479	52.7769	697.8	3863.87	3756.26	424.482	44.5107	-0.01965	-2.3343
		S.D.	3.75551	1.96893	10.466	255.068	349.219	79.2797	10.3056	0.0112075	0.0702174
		C.V.	0.0543112	0.0373067	0.0149985	0.0660135	0.0929698	0.186768	0.231531	-0.570356	-0.0300807
4_February_25_2014_31163140	2458-3263	S5	60.75	54.781	565	2717.2	2622.3	660.77	49.436	-0.004	-3.019
4_February_25_2014_32555062	1602-2420	S5	56.182	56.19	565	2811.1	2889.5	775.73	54.378	-0.007	-2.992
4_February_25_2014_32637312	731-1546	S5	52.81	51.137	565	2457.5	2566	642.5	31.962	-0.01	-2.764
4_February_25_2014_34187781	1171-1973	S5	53.188	54.012	565	2674.5	2351	684.02	30.063	-0.011	-2.826
4_February_25_2014_35801078	217-1025	S5	53.291	55.502	551	2727.5	2430.5	686.07	32.008	0.0033	-3.172
4_February_25_2014_35806187	1737-2573	S5	54.82	55.386	565	2412.1	2274.2	655.49	31.449	-0.014	-2.857
4_February_25_2014_35889625	3926-4745	S5	53.86	52.486	565	2584.9	2459	592.07	33.221	0.0013	-3.139
4_February_25_2014_35961265	3857-4676	S5	59.815	52.556	565	2487.6	2232.4	650.71	30.73	-0.007	-2.96
4_February_25_2014_36015109	3698-4513	S5	58.42	50.863	580	2430.7	2326.4	667.93	59.855	0.0088	-3.041
4_February_25_2014_36020187	277-1054	S5	58.877	51.032	565	2544	2362.1	607.3	32.084	0.0045	-3.002
4_February_25_2014_36320234	565-1383	S5	56.582	53.213	565	2581.7	2212.9	667.27	50.959	-0.004	-2.918
4_February_25_2014_36819593	509-1319	S5	61.87	52.174	565	2613	2435.2	569.19	31.121	-0.01	-3.181
4_February_25_2014_36854203	1095-1927	S5	56.734	50.45	572.5	2533.7	2468.2	668.81	56.101	0.0021	-2.866
4_February_25_2014_38315750	1078-1879	S5	54.91	49.985	580	3015.5	2882.7	630.27	37.077	-0.011	-3.026
4_February_25_2014_38735406	3491-4297	S5	58.82	49.533	565	2731.2	2731.7	659.84	47.152	0.0121	-3.075
4_February_25_2014_38772359	2028-2853	S5	57.277	51.779	565	2625.1	2374.2	584.53	33.777	-0.015	-3.024
4_February_25_2014_38919687	2767-3582	S5	59.615	54.483	565	3049.9	3259.7	713.62	31.247	-0.013	-2.971
4_February_25_2014_38924765	2584-3432	S5	58.775	53.83	565	3781.7	2813.4	748.78	32.62	-0.012	-2.791
4_February_25_2014_39042281	2197-3022	S5	60.387	48.622	565	2774.1	2421.4	590.21	30.605	0.0098	-2.885
4_February_25_2014_39085781	2268-3102	S5	59.675	52.116	565	2613.2	2227.4	681.17	32.84	0.0062	-3.057
	38.4343	mean	57.3329	52.5065	566.175	2708.31	2517.01	656.814	38.4343	-0.003495	-2.9783
		S.D.	2.77935	2.13362	5.95879	305.257	273.876	52.9883	10.1646	0.00875776	0.120292
		C.V.	0.0484774	0.0406353	0.0105247	0.112711	0.10881	0.0806748	0.264467	-2.5058	-0.0403894
4_February_25_2014_31163140	2458-3263	S6	113.24	53.664	565	3368.6	3237.9	489.56	41.838	-0.012	-2.39
4_February_25_2014_32555062	1602-2420	S6	115.3	54.455	565	4493.6	3327	566.16	33.374	-0.012	-2.299
4_February_25_2014_32637312	731-1546	S6	111.74	49.496	587.5	4737	3537.2	423.78	32.004	-0.014	-2.22
4_February_25_2014_34187781	1171-1973	S6	113.4	52.805	565	3231.1	3851.2	543.19	55.726	-0.017	-2.315
4_February_25_2014_35801078	217-1025	S6	109.5	53.243	565	3128.9	3505.2	446.1	42.759	-0.013	-2.354
4_February_25_2014_35806187	1737-2573	S6	114.1	53.644	580	3684	3649.7	453.25	58.317	-0.009	-2.141
4_February_25_2014_35889625	3926-4745	S6	101.94	50.203	587.5	3223.4	3467.8	427.85	37.47	-0.002	-2.123
4_February_25_2014_35961265	3857-4676	S6	119.75	51.83	565	3363.8	3472.3	509.23	52.035	-0.013	-2.18
4_February_25_2014_36015109	3698-4513	S6	101.1	50.162	565	3124.5	3331	421.55	51.296	-0.006	-2.089
4_February_25_2014_36020187	277-1054	S6	106.95	49.684	580	3462.6	3344.6	471.8	32.913	-0.01	-2.249
4_February_25_2014_36320234	565-1383	S6	115.73	52.498	565	3381.6	3474.2	518.07	48.235	-0.018	-2.406
4_February_25_2014_36819593	509-1319	S6	116.29	51.718	595	4262.1	3603.8	400.33	37.458	-0.021	-2.382
4_February_25_2014_36854203	1095-1927	S6	114.74	49.4	580	3577	3478.9	417.54	30.184	-0.022	-2.097
4_February_25_2014_38315750	1078-1879	S6	101.7	48.235	612	3381.3	3986.5	342.79	52.733	-0.018	-2.246
4_February_25_2014_38735406	3491-4297	S6	104.87	49.464	572.5	3243.7	3696.7	414.53	32.456	-0.014	-2
4_February_25_2014_38772359	2028-2853	S6	104.76	51.514	580	3782	3873.9	453.35	35.46	-0.02	-2.251
4_February_25_2014_38919687	2767-3582	S6	114.73	54.222	580	3361.4	3449	536.2	33.139	-0.008	-2.238
4_February_25_2014_38924765	2584-3432	S6	113.74	53.453	565	4729.2	3715.4	489.18	37.052	-0.006	-2.211
4_February_25_2014_39042281	2197-3022	S6	95.5	48.162	565	3783.3	3598.8	429.65	31.752	-0.007	-2.302
4_February_25_2014_39085781	2268-3102	S6	115.3	50.606	565	3807.7	3844.1	500.95	41.768	-0.012	-2.39
		mean	110.219	51.4229	575.225	3656.34	3572.26	462.753	40.8985	-0.0127	-2.24415
		S.D.	6.52946	2.0125	13.0015	512.594	205.208	55.9039	9.03728	0.00546857	0.080527
		C.V.	0.0592408	0.0391363	0.0226024	0.140193	0.0574449	0.120807	0.220969	-0.430596	-0.0358831
4_February_25_2014_31163140	2458-3263	S7	192.4	59.556	1102	4429	4449.9	265.85	46.201	0.0005	-2.263
4_February_25_2014_32555062	1602-2420	S7	222.73	58.754	958	4794.7	4453.9	268.67	59.544	-0.007	-2.337
4_February_25_2014_32637312	731-1546	S7	214.53	54.074	760	3955.9	4003.8	221.64	65.043	-0.002	-2.526
4_February_25_2014_34187781	1171-1973	S7	206.55	57.691	848	4811.9	4988	248.31	35.999	-0.004	-2.281
4_February_25_2014_35801078	217-1025	S7	209.54	58.398	938	4528.5	4790.7	241.94	65.039	-0.001	-2.255
4_February_25_2014_35806187	1737-2573	S7	215.53	57.917	816	5101.8	4642.9	264.67	49.524	-0.002	-2.317
4_February_25_2014_35889625	3926-4745	S7	212.53	54.725	882	5526.7	4411.6	256.66	52.922	0.0001	-2.177
4_February_25_2014_35961265	3857-4676	S7	218.52	55.234	882	3709.5	4230.5	260.86	35.662	-0.003	-2.451
4_February_25_2014_36015109	3698-4513	S7	212.22	54.894	958	5781.1	5030.8	234.35	46.095	-0.006	-2.295
4_February_25_2014_36020187	277-1054	S7	212.43	54.787	882	4428.3	4475.9	263.87	46.212	-0.005	-2.253
4_February_25_2014_36320234	565-1383	S7	217.97	57.878	848	3217	4832.9	263.03	53.439	-0.002	-2.373
4_February_25_2014_36819593	509-1319	S7	211.54	55.776	958	4380.7	4467.9	244.28	35.228	0.0007	-2.389
4_February_25_2014_36854203	1095-1927	S7	210.45	55.653	816	3501.6	5193.8	259.36	36.447	-0.006	-2.187
4_February_25_2014_38315750	1078-1879	S7	220.4	54.77	735	3452.3	4403.3	206.09	45.179	-0.003	-2.483
4_February_25_2014_38735406	3491-4297	S7	212.59	53.786	900	4261.3	4460.9	259.83	38.638	0	-2.327
4_February_25_2014_38772359	2028-2853	S7	221.07	55.216	1002	4329.1	4476.3	275.46	40.704	-0.004	-2.296
4_February_25_2014_38919687	2767-3582	S7	212.34	59.806	882	4540.5	4738.3	274.17	37.464	-0.003	-2.183
4_February_25_2014_38924765	2584-3432	S7	214.53	60.355	1470	4506	4679	255.48	47.81	0	-2.118
4_February_25_2014_39042281	2197-3022	S7	211.74	53.322	735	5109.4	4408.9	236.61	46.415	-0.006	-2.456
4_February_25_2014_39085781	2268-3102	S7	195.83	54.995	816	4105.4	4106.9	246.57	47.442	0	-2.359
	46.5503	mean	212.272	56.3794	909.4	4423.53	4562.31	252.385	46.5503	-0.002635	-2.3163
		S.D.	7.45137	2.18383	160.23	665.952	302.216	17.6833	9.15874	0.00246966	0.109117
		C.V.	0.0354696	0.0387345	0.176193	0.150547	0.0662418	0.0700646	0.196749	-0.937254	-0.0471081
	C.V.	syllable	Duration	Amplitude	Pitch	Mean freq	Peak_freq	Goodness	FM	AM	Entropy
		S1	0.0690826	0.025745	0.0133993	0.181595	0.129189	0.156658	0.12316	0.725252	-0.17518
		S2	0.0659215	0.0242012	0.0228524	0.1039	0.20996	0.13963	0.0885553	-10.6719	-0.0850445
		S3	0.0496595	0.0292278	0.0115959	0.175676	0.343852	0.116469	0.112182	2.51991	-0.230536
		S4	0.0543112	0.0373067	0.0149985	0.0660135	0.0929698	0.186768	0.231531	-0.570356	-0.0300807
		S5	0.0484774	0.0406353	0.0105247	0.112711	0.10881	0.0806748	0.264467	-2.5058	-0.0403894
		S6	0.0592408	0.0391363	0.0226024	0.140193	0.0574449	0.120807	0.220969	-0.430596	-0.0358831
		S7	0.0354696	0.0387345	0.176193	0.150547	0.0662418	0.0700646	0.196749	-0.937254	-0.0471081
		MEAN	0.0545947	0.0335696	0.0388809	0.132948	0.144067	0.124439	0.176802	-1.69582	-0.0920316

## Sheet: yellow 14
song file	Duration	syllable	Duration	Amplitude	Pitch	Mean freq	Peak_freq	Goodness	FM	AM	Entropy
3_December_10_2014_33961312	873-1659	S1	49.743	50.542	580	3322.5	2728.1	796.72	45.495	0.0204	-1.403
3_December_10_2014_34192828	1001-1817	S1	48.88	47.4	544	4451.1	4397.5	867.51	41.917	0.0093	-1.027
3_December_10_2014_34252609	1547-2339	S1	47.91	51.383	565	3455.1	2572.3	906.29	38.275	0.022	-1.127
3_December_10_2014_34279890	3680-4462	S1	46.93	47.004	551	4429.5	4048.2	758.1	38.121	0.0242	-1.364
3_December_10_2014_34296765	1484-2294	S1	51.322	49.868	551	3459.7	3056.8	992.58	43.431	0.009	-1.334
3_December_10_2014_34327453	2473-3261	S1	50.55	50.236	565	4988.8	4900.9	781.38	43.406	0.0065	-1.027
3_December_10_2014_34342453	3512-4294	S1	45.95	45.606	565	2813.5	2342.8	509.26	39.268	0.0157	-1.465
3_December_10_2014_34356843	463-1257	S1	47.81	48.828	551	4954.1	5415.8	804.56	44.111	0.0188	-1.343
3_December_10_2014_34367859	238-1025	S1	43.221	47.616	551	3833.2	3749.4	837.77	47.925	0.0045	-1.606
3_December_10_2014_34392531	1503-2292	S1	50.36	50.34	580	4985.9	5268.1	905.61	46.579	0.0181	-1.082
3_December_10_2014_34416437	809-1587	S1	51.82	48.05	565	4546.4	4504.2	740.53	44.211	0.0039	-1.344
3_December_10_2014_34473453	4059-4837	S1	52.79	50.372	565	4019.4	3365	934.83	43.523	0.0172	-1.064
3_December_10_2014_34551687	2120-2892	S1	46.43	48.861	551	4475.1	4302	871.92	37.851	0.0274	-1.359
3_December_10_2014_34569734	1237-2019	S1	51.82	48.668	565	4547.5	4717.5	829.77	49.27	0.0064	-1.286
3_December_10_2014_34610125	223-522	S1	43.9	47.409	565	4077.2	4012	661.53	43.075	0.0172	-1.742
3_December_10_2014_34783343	382-1160	S1	59.763	48.349	565	3379.2	2478.9	710.36	37.816	-0.001	-1.185
3_December_10_2014_34927984	249-1040	S1	48.8	46.363	537	5167.7	5379.6	946.85	35.157	0.011	-1.012
3_December_10_2014_34989171	254-1047	S1	51.82	47.975	551	4464	4377.8	801.79	38.351	0.0167	-1.212
3_December_10_2014_35079015	2136-2932	S1	50.544	47.695	551	3764.2	2581.2	1033.5	30.697	0.0052	-0.948
3_December_10_2014_35136843	304-1101	S1	46.83	48.421	565	3396.8	2606.4	759.08	38.884	0.0021	-1.272
3_December_10_2014_40621703	617-1405	S1	50.74	47.731	565	3187	2758	976.17	37.735	-0.001	-1.373
	mean	S1	49.4254	48.5103	559.429	4081.8	3788.69	829.815	41.1951	0.0120762	-1.26548
	S.D.		3.55554	1.4938	10.9434	687.965	1051.73	121.923	4.53483	0.00840464	0.203796
	C.V.		0.0719376	0.0307934	0.0195617	0.168544	0.277597	0.146928	0.110082	0.695967	-0.161043
3_December_10_2014_33961312	873-1659	S2	66.57	61.399	787	3852.6	3860	253.36	34.359	0.0154	-2.662
3_December_10_2014_34192828	1001-1817	S2	61.8	55.651	689	3882.5	3906.4	241.61	32.006	-0.008	-2.328
3_December_10_2014_34252609	1547-2339	S2	74.819	57.873	689	3644.8	3273	301.53	34.339	0.003	-1.751
3_December_10_2014_34279890	3680-4462	S2	68.33	58.715	711	4048.4	4036.3	244.61	37.443	-0.021	-2.737
3_December_10_2014_34296765	1484-2294	S2	68.52	60.421	711	3973	4072	230.53	29.589	-0.011	-2.793
3_December_10_2014_34327453	2473-3261	S2	76.34	56.01	711	3986.3	3882.7	360.32	37.614	-0.014	-1.963
3_December_10_2014_34342453	3512-4294	S2	68.5	56.198	689	3795.5	3848.3	252	32.242	0	-2.626
3_December_10_2014_34356843	463-1257	S2	48.274	58.178	711	4232.7	4243.6	297.85	34.26	0.0009	-2.076
3_December_10_2014_34367859	238-1025	S2	66.375	58.722	689	4878.8	3994.9	340.16	34.522	0.0022	-2.716
3_December_10_2014_34392531	1503-2292	S2	43.8	61.414	711	4177	4221.2	260.23	34.484	-0.002	-1.549
3_December_10_2014_34416437	809-1587	S2	62.474	62.435	711	4234.6	4246	227.79	36.815	-0.018	-2.993
3_December_10_2014_34473453	4059-4837	S2	68.122	61.726	711	4115.5	4111.1	232.58	33.266	-0.004	-1.455
3_December_10_2014_34551687	2120-2892	S2	67.54	57.942	689	4134.3	3984.3	366.25	37.748	-0.001	-1.556
3_December_10_2014_34569734	1237-2019	S2	48.552	59.53	711	4103.6	4119.1	317.71	35.716	-0.009	-2.731
3_December_10_2014_34610125	223-522	S2	70.848	59.217	689	4059.8	4065.5	233.26	36.843	0.0049	-2.85
3_December_10_2014_34783343	382-1160	S2	68.254	58.93	711	4170	4258.9	266.92	41.449	0	-2.027
3_December_10_2014_34927984	249-1040	S2	66.1	57.966	689	4733.8	4202.4	373.4	35.074	0.0009	-2.575
3_December_10_2014_34989171	254-1047	S2	68.164	56.032	711	3908.2	3856	305.45	44.366	-0.006	-2.282
3_December_10_2014_35079015	2136-2932	S2	66.482	56.444	760	4043.5	4281.3	278.42	40.258	-0.013	-1.817
3_December_10_2014_35136843	304-1101	S2	69.85	56.893	711	4016.3	3876.6	292.45	37.604	0.0014	-1.974
3_December_10_2014_40621703	617-1405	S2	70.88	58.795	668	3914.2	3994.2	307.4	32.586	0.0019	-2.271
	mean	S2	65.2664	58.5948	707.571	4090.73	4015.9	284.944	35.8373	-0.0036381	-2.27295
	S.D.		8.40375	2.02288	25.6585	280.864	225.594	46.8339	3.41433	0.00853595	0.478848
	C.V.		0.128761	0.0345232	0.0362627	0.0686587	0.0561754	0.164362	0.095273	-2.34627	-0.210672
3_December_10_2014_33961312	873-1659	S3	60.326	54.227	565	4923.1	5097.4	367.47	40.379	-0.002	-1.377
3_December_10_2014_34192828	1001-1817	S3	64.183	49.561	551	5242.4	5792.4	302.71	36.158	0.0024	-1.304
3_December_10_2014_34252609	1547-2339	S3	66.358	52.382	565	4342.3	3225.9	313.95	43.017	-0.003	-1.008
3_December_10_2014_34279890	3680-4462	S3	69.47	51.057	565	4778.9	5004.8	391.97	42.869	0.0127	-1.57
3_December_10_2014_34296765	1484-2294	S3	74.83	52.259	565	4047.8	4027.3	445.48	43.662	0.0195	-1.449
3_December_10_2014_34327453	2473-3261	S3	71.823	52.571	551	4705.6	4712.3	328.95	31.318	0.0036	-1.436
3_December_10_2014_34342453	3512-4294	S3	60.88	49.987	580	3782.5	3423	383.9	42.241	-0.006	-1.364
3_December_10_2014_34356843	463-1257	S3	66.54	52.404	580	5273.1	5414.2	365.3	42.807	-0.01	-1.604
3_December_10_2014_34367859	238-1025	S3	60.68	50.894	565	4478.7	4584.3	509.06	45.268	-0.004	-1.693
3_December_10_2014_34392531	1503-2292	S3	65.8	53.006	580	4853.6	5194.6	306.46	49.849	0.0085	-1.61
3_December_10_2014_34416437	809-1587	S3	67.82	50.582	551	4996	5120.1	329.38	43.607	0.0042	-2.498
3_December_10_2014_34473453	4059-4837	S3	70.365	53.554	630	4883.6	5227.5	386.57	43.235	-0.003	-1.287
3_December_10_2014_34551687	2120-2892	S3	66.1	52.593	551	5036.1	5384.6	391.05	49.249	0.0098	-1.576
3_December_10_2014_34569734	1237-2019	S3	65.857	51.882	621	4385.7	4417.3	457.1	43.934	-0.006	-1.641
3_December_10_2014_34610125	223-522	S3	61.866	51.315	565	4826.5	5064.3	470.07	36.069	0.0069	-1.535
3_December_10_2014_34783343	382-1160	S3	77.852	50.573	537	4611.9	4589.6	308.69	49.998	0.0111	-2.557
3_December_10_2014_34927984	249-1040	S3	66.854	50.565	565	4630.3	4706.3	345.53	42.589	-0.009	-1.473
3_December_10_2014_34989171	254-1047	S3	63.861	51.922	572.5	4631.9	4750	385.42	42.885	0.0108	-1.673
3_December_10_2014_35079015	2136-2932	S3	47.52	51.204	551	4549.1	4682.7	304.37	40.807	-0.004	-1.352
3_December_10_2014_35136843	304-1101	S3	63.861	52.361	551	4400.7	4301.6	379.56	47.165	0.0091	-1.655
3_December_10_2014_40621703	617-1405	S3	42.157	52.114	580	4371	4490.5	386.25	39.641	-0.001	-1.402
	mean	S3	64.524	51.7625	568.643	4654.8	4724.32	374.25	42.7022	0.00240952	-1.57448
	S.D.		7.96389	1.17775	22.3591	366.768	624.896	58.3002	4.54087	0.00807012	0.356446
	C.V.		0.123425	0.022753	0.0393201	0.0787936	0.132272	0.155779	0.106338	3.34926	-0.22639
3_December_10_2014_33961312	873-1659	S4	244.26	56.97	848	4512.3	4409	454.06	64.485	-0.009	-2.021
3_December_10_2014_34192828	1001-1817	S4	240.13	51.847	882	4282.4	4227.6	296.6	44.26	-0.001	-1.883
3_December_10_2014_34252609	1547-2339	S4	284.34	56.061	900	4313.4	4260.8	470.43	44.766	-0.001	-1.988
3_December_10_2014_34279890	3680-4462	S4	235.9	54.87	918	4625.4	4706	325.04	46.472	-0.005	-2.354
3_December_10_2014_34296765	1484-2294	S4	276.2	55.4	882	4454.5	4453.7	345.59	43.729	-0.005	-2.143
3_December_10_2014_34327453	2473-3261	S4	282.8	56.329	882	4431.4	4534.5	318.23	62.054	-0.009	-2.244
3_December_10_2014_34342453	3512-4294	S4	285.37	51.492	882	4197.4	3996.6	438.18	46.784	-0.003	-2.012
3_December_10_2014_34356843	463-1257	S4	268.77	55.271	918	4904.5	4824.8	349.54	63.466	-0.005	-2.103
3_December_10_2014_34367859	238-1025	S4	237.89	55.34	918	4655.4	4741.3	355.16	45.634	-0.004	-1.411
3_December_10_2014_34392531	1503-2292	S4	242.41	56.572	918	4646.2	4755.1	356.07	45.095	-0.004	-1.374
3_December_10_2014_34416437	809-1587	S4	287.39	54.214	848	4768.6	4793.5	353.71	47.583	-0.004	-2.339
3_December_10_2014_34473453	4059-4837	S4	248.59	56.695	882	4597.8	4681.2	417.77	43.378	-0.005	-1.976
3_December_10_2014_34551687	2120-2892	S4	237.35	55.379	882	4752.7	4756.6	483.69	44.17	-0.005	-2.154
3_December_10_2014_34569734	1237-2019	S4	243.4	54.717	882	3689.7	4712.3	449.33	47.04	-0.004	-2.293
3_December_10_2014_34610125	223-522	S4	294.28	54.264	958	4533.2	4534.5	430.63	48.291	-0.003	-2.916
3_December_10_2014_34783343	382-1160	S4	236.9	54.197	848	4504.4	4611.4	326.76	43.079	-0.002	-1.984
3_December_10_2014_34927984	249-1040	S4	279.8	52.706	882	3544.3	4423.3	307.71	55.199	-0.009	-1.363
3_December_10_2014_34989171	254-1047	S4	236.67	54.632	848	4493.3	4515.6	276.49	44.671	-0.004	-2.504
3_December_10_2014_35079015	2136-2932	S4	251.68	55.49	848	4415	4389.4	350.69	47.057	-0.004	-2.031
3_December_10_2014_35136843	304-1101	S4	285.29	55.133	1002	4314.8	4205.2	425.99	45.848	-0.004	-2.148
3_December_10_2014_40621703	617-1405	S4	237.39	55.461	958	4470.8	4521.8	310.35	46.258	0	-1.309
	mean		258.896	54.9067	894.571	4433.69	4526.39	373.43	48.539	-0.00428571	-2.02619
	S.D.		21.9378	1.45677	41.1832	321.889	223.862	63.2745	6.69252	0.00243193	0.398699
	C.V.		0.0847361	0.0265318	0.0460368	0.0726008	0.0494571	0.169442	0.137879	-0.56745	-0.196773
3_December_10_2014_33961312	873-1659	S5	153.26	62.321	537	3810.9	3905.6	552.48	26.187	-0.013	-2.36196
3_December_10_2014_34192828	1001-1817	S5	154.6	59.39	689	3617.3	3475.5	611.22	27.995	-0.005	-1.46496
3_December_10_2014_34252609	1547-2339	S5	159.27	63.622	672	3910.2	3983	568.15	30.458	-0.009	-2.03596
3_December_10_2014_34279890	3680-4462	S5	161.87	64.075	731	3750.2	3614.9	590.26	28.761	-0.011	-2.18396
3_December_10_2014_34296765	1484-2294	S5	187.19	61.872	662	3673.3	3718	676.69	31.072	-0.006	-2.56296
3_December_10_2014_34327453	2473-3261	S5	172.4	62.842	680	4873.8	3813.7	538.2	27.469	-0.007	-1.93096
3_December_10_2014_34342453	3512-4294	S5	171.96	58.509	791	3689.4	3638.3	611.6	29.098	-0.006	-2.37196
3_December_10_2014_34356843	463-1257	S5	184.4	60.267	803	4213.3	3611.9	459.17	30.281	-0.007	-2.17596
3_December_10_2014_34367859	238-1025	S5	179.59	63.07	612	3658	3629.6	463.28	28.282	-0.013	-2.54996
3_December_10_2014_34392531	1503-2292	S5	185.6	64.477	595	3724.4	3640.9	518.42	25.668	-0.009	-2.33696
3_December_10_2014_34416437	809-1587	S5	151.32	63.338	681	3889.2	3865.4	426.04	28.443	-0.012	-2.61196
3_December_10_2014_34473453	4059-4837	S5	149.11	63.342	773	3898.2	3970.2	577.87	27.057	-0.007	-2.01496
3_December_10_2014_34551687	2120-2892	S5	138.48	64.008	721	3695.4	3623.1	576.05	28.128	-0.009	-2.43096
3_December_10_2014_34569734	1237-2019	S5	168.6	64.584	620	3786.2	3714.4	475.42	37.233	-0.004	-2.29096
3_December_10_2014_34610125	223-522	S5	165.42	59.515	712	3914.9	3870.2	414.12	30.346	-0.022	-1.77996
3_December_10_2014_34783343	382-1160	S5	152.48	61.802	835	3022.6	3762.5	495.35	30.732	-0.006	-2.28696
3_December_10_2014_34927984	249-1040	S5	153.74	62.715	611	3615.5	3586.6	507.41	32.563	-0.009	-2.68496
3_December_10_2014_34989171	254-1047	S5	170.83	63.431	592	3609.9	3588.4	429.61	25.414	-0.01	-2.80896
3_December_10_2014_35079015	2136-2932	S5	170.25	62.08	751	3129.3	3582.3	544	38.309	-0.014	-1.2396
3_December_10_2014_35136843	304-1101	S5	136.12	62.847	670	3584.2	3523.4	587.56	28.286	-0.008	-2.13196
3_December_10_2014_40621703	617-1405	S5	182.64	62.206	731	3712	3869.5	580.73	29.136	-0.014	-2.38396
	mean	S5	164.244	62.3959	689	3751.34	3713.69	533.506	29.5675	-0.00957143	-2.22099
	S.D.		15.0536	1.69701	77.5706	360.35	149.63	70.4541	3.27435	0.00411791	0.385769
	C.V.		0.0916536	0.0271975	0.112584	0.096059	0.0402916	0.132059	0.110741	-0.430229	-0.173692
	C.V.	syllable	Duration	Amplitude	Pitch	Mean freq	Peak_freq	Goodness	FM	AM	Entropy
		S1	0.0719376	0.0307934	0.0195617	0.168544	0.277597	0.146928	0.110082	0.695967	-0.161043
		S2	0.128761	0.0345232	0.0362627	0.0686587	0.0561754	0.164362	0.095273	-2.34627	-0.210672
		S3	0.123425	0.022753	0.0393201	0.0787936	0.132272	0.155779	0.106338	3.34926	-0.22639
		S4	0.0847361	0.0265318	0.0460368	0.0726008	0.0494571	0.169442	0.137879	-0.56745	-0.196773
		S5	0.0916536	0.0271975	0.112584	0.096059	0.0402916	0.132059	0.110741	-0.430229	-0.173692
			0.100103	0.0283598	0.0507531	0.0969313	0.111159	0.153714	0.112063	0.140256	-0.193714

## Sheet: yellow 16
song file	Duration	syllable	Duration	Amplitude	Pitch	Mean freq	Peak_freq	Goodness	FM	AM	Entropy
1_December_10_2014_29923015	1863-2891	S1	46.88	57.867	525	3976.1	3700.1	850.1	36.032	0.0112	-1.448
1_December_10_2014_29929546	2-1015	S1	46.26	43.252	512	1797.2	1348.6	981.4	22.436	-0.039	-1.653
1_December_10_2014_30169328	274-1286	S1	43.87	59.246	551	4269.3	4593.7	794.23	45.911	0.0001	-1.672
1_December_10_2014_30282109	208-1199	S1	46.267	59.931	537	4450.3	4942.1	1019	29.695	0.0262	-1.545
1_December_10_2014_30390656	255-1287	S1	47.86	54.616	551	3445.6	3196.7	900.04	32.845	0.0189	-1.831
1_December_10_2014_32200406	797-1857	S1	49.552	55.57	551	3882.1	3820.2	789.42	42.372	0.0147	-1.634
1_December_10_2014_32205515	1200-2280	S1	43.83	52.23	595	2621.3	2501.6	828.15	19.903	0.0046	-1.761
1_December_10_2014_32352765	3157-4245	S1	48.19	52.019	630	3570	3635.2	830.1	30.695	0.008	-1.668
1_December_10_2014_32362937	186-1140	S1	45.36	56.029	537	4956.3	4957.8	797.52	37.348	0.0037	-1.595
1_December_10_2014_33231625	641-1671	S1	49.22	60.862	537	3871.9	3679.2	763.2	30.817	0.0125	-1.52
1_December_10_2014_33242062	1661-2699	S1	43.129	60.528	537	4047.9	3922.2	856.59	38.458	-0.001	-1.514
1_December_10_2014_33265937	1583-2619	S1	45.379	59.866	551	4444.2	4283.8	868.03	40.617	0.006	-1.589
1_December_10_2014_33323687	1657-2657	S1	44.516	57.845	551	3624.4	3262.5	826.72	23.345	0.0197	-1.563
1_December_10_2014_33417046	993-2002	S1	44.293	55.436	537	4098.5	3437.9	908.79	35.106	0.0131	-1.681
1_December_10_2014_33422125	116-1138	S1	47.582	56.758	551	3934.2	3356.6	800.06	35.774	0.019	-1.604
1_December_10_2014_33805000	1288-2205	S1	46.658	54.787	551	4685.2	4694.2	865.29	41.881	0.0125	-1.343
1_December_10_2014_33810093	416-1434	S1	46.489	60.162	537	4439.5	4440.6	784.48	41.329	0.0057	-1.491
1_December_10_2014_38365578	1251-2449	S1	49.82	58.539	531	4598.9	4316.7	860.7	38.229	0.0111	-1.561
1_December_10_2014_38444296	3009-4005	S1	45.775	51.828	525	4817.1	4858.5	853.51	43.205	0.0002	-1.372
1_December_10_2014_38496671	2070-3063	S1	44.519	55.143	551	4363.6	3919	777.71	36.527	0.0191	-1.454
	mean	S1	46.2725	56.1257	547.4	3994.68	3843.36	847.752	35.1263	0.008315	-1.57495
	SD		1.97458	4.17132	25.5124	748.382	883.346	66.059	7.18804	0.0134027	0.121671
	C.V.		0.0426729	0.0743209	0.0466066	0.187345	0.229837	0.0779225	0.204634	1.61187	-0.0772539
1_December_10_2014_29923015	1863-2891	S2	75.327	57.476	595	3462.7	2933.6	984.54	27.068	0.0098	-1.915
1_December_10_2014_29929546	2-1015	S2	69.531	42.651	551	1524.9	1228.1	605.87	21.41	0.02	-1.593
1_December_10_2014_30169328	274-1286	S2	74.629	59.684	612	3993.8	3786.3	1063.6	29.749	0.0054	-1.86
1_December_10_2014_30282109	208-1199	S2	67.445	60.795	595	3224.1	2468	1053.6	22.755	0.0072	-1.72
1_December_10_2014_30390656	255-1287	S2	70.669	51.446	595	3595.4	3087.4	942.39	23.042	0.0116	-1.858
1_December_10_2014_32200406	797-1857	S2	60.525	53.114	580	4126.1	4321.5	882.19	25.829	0.0091	-2.088
1_December_10_2014_32205515	1200-2280	S2	60.402	43.126	551	1898.2	1692.1	600.19	29.341	-0.015	-1.763
1_December_10_2014_32352765	3157-4245	S2	54.875	52.632	630	3613.6	3675.5	673.64	36.118	0.0323	-1.635
1_December_10_2014_32362937	186-1140	S2	65.85	60.831	580	3505.5	3726.5	883.28	19.635	0.0492	-1.536
1_December_10_2014_33231625	641-1671	S2	64.827	59.328	580	3536.7	3173.7	1105.9	19.926	0.0299	-1.978
1_December_10_2014_33242062	1661-2699	S2	71.834	60.617	580	3459.6	3124.9	1106.3	35.306	0.0147	-2.037
1_December_10_2014_33265937	1583-2619	S2	70.339	61.853	595	3747.3	3340.9	944.73	27.45	0.0209	-2.227
1_December_10_2014_33323687	1657-2657	S2	72.8	51.669	595	3360.8	2946.2	881.22	23.93	0.0041	-1.526
1_December_10_2014_33417046	993-2002	S2	70.134	54.367	595	4535.1	4799.8	960.91	27.458	0.0072	-1.9
1_December_10_2014_33422125	116-1138	S2	68.282	54.119	580	4436	4922.8	889.56	28.303	-0.005	-2.069
1_December_10_2014_33805000	1288-2205	S2	72.54	54.952	595	4246.3	4254.3	898.31	38.701	0.0119	-1.854
1_December_10_2014_33810093	416-1434	S2	65.227	60.91	580	3703.2	3710	808.2	27.01	0.0107	-1.616
1_December_10_2014_38365578	1251-2449	S2	63.809	61.094	580	3853.1	4016.7	880.82	30.634	0	-1.649
1_December_10_2014_38444296	3009-4005	S2	69.341	55.135	612	3662.8	3846.4	659.56	29.567	0.0126	-1.642
1_December_10_2014_38496671	2070-3063	S2	68.83	54.876	595	4012.2	4076.9	933.42	26.389	0.0131	-1.756
	mean	S2	60.4177	51.0912	537.498	3358.51	3240.73	810.41	26.1945	0.0792661	-1.63361
	SD		5.14922	5.55764	18.4693	730.281	929.437	152.775	5.1286	0.0137513	0.200302
	C.V.		0.085227	0.108779	0.0343616	0.217442	0.286799	0.188516	0.19579	0.173483	-0.122614
1_December_10_2014_29923015	1863-2891	S3	179.32	51.561	580	2776.2	2558.1	486.51	43.279	0.0085	-2.061
1_December_10_2014_29929546	2-1015	S3	180.6	51.379	572.5	2829.5	2700.9	453.91	46.457	0.0006	-2.045
1_December_10_2014_30169328	274-1286	S3	174.15	53.992	612	3309.8	3150	440.65	56.673	0.0012	-2.068
1_December_10_2014_30282109	208-1199	S3	189.36	53.942	595	3635.8	2839.3	488.47	49.328	0.0024	-1.99
1_December_10_2014_30390656	255-1287	S3	185.59	48.388	572.5	3389.5	3237.7	425.41	44.236	-0.005	-2.182
1_December_10_2014_32200406	797-1857	S3	192.8	48.337	551	3239.2	3141.2	372.07	44.487	0.0013	-1.98
1_December_10_2014_32205515	1200-2280	S3	193.6	49.871	537	2996.4	2696.8	394.23	34.87	0.0013	-2.007
1_December_10_2014_32352765	3157-4245	S3	182.63	46.041	551	2292.1	2169.8	423.7	41.623	0.0033	-1.823
1_December_10_2014_32362937	186-1140	S3	181.6	59.31	580	2788.5	2876.7	442.48	45.717	0	-1.758
1_December_10_2014_33231625	641-1671	S3	192.57	55.765	565	3070.7	2944.4	475.47	45.653	0	-2.243
1_December_10_2014_33242062	1661-2699	S3	175.42	51.735	551	2893.8	2701.1	483.95	41.878	0.0088	-2.103
1_December_10_2014_33265937	1583-2619	S3	172.38	52.284	580	3476.1	3479.4	456.84	41.957	0.0015	-2.239
1_December_10_2014_33323687	1657-2657	S3	180.49	49.775	565	2899.9	2796.8	437.5	36.596	0.0061	-1.716
1_December_10_2014_33417046	993-2002	S3	182.18	49.006	603.5	3272.1	3166.7	399.11	57.013	-0.008	-2.212
1_December_10_2014_33422125	116-1138	S3	181.64	50.267	595	3239	2989.8	393.86	41.212	0	-2.406
1_December_10_2014_33805000	1288-2205	S3	165.89	49.83	565	3537.2	2705.4	382.62	41.455	-0.001	-2.039
1_December_10_2014_33810093	416-1434	S3	161.54	55.31	565	3726.9	2870.9	444.6	44.914	0.0037	-2.067
1_December_10_2014_38365578	1251-2449	S3	180.22	59.667	580	3085.8	2849.8	484.61	46.356	0.0064	-1.912
1_December_10_2014_38444296	3009-4005	S3	184.56	48.993	565	3622.4	3409.5	437.65	44.737	-0.005	-1.929
1_December_10_2014_38496671	2070-3063	S3	183.16	48.114	565	3277.1	3085.2	408.27	59.034	-0.005	-1.811
	mean	S3	180.985	51.6784	572.525	3167.9	2918.48	436.596	45.3738	0.001055	-2.02955
	SD		8.29773	3.67084	18.839	358.578	304.816	36.4657	6.21043	0.00449192	0.175949
	C.V.		0.0458476	0.0710324	0.0329051	0.113191	0.104444	0.0835228	0.136873	4.25774	-0.0866936
1_December_10_2014_29923015	1863-2891	S4	65.85	52.619	565	3773.9	3710.8	450.46	33.239	0.0086	-1.861
1_December_10_2014_29929546	2-1015	S4	67.54	51.74	612	3904.3	3919.7	475.04	40.212	0.0098	-1.806
1_December_10_2014_30169328	274-1286	S4	69.63	54.9	565	4132.6	4038.9	469.93	44.576	0.0068	-1.965
1_December_10_2014_30282109	208-1199	S4	68.456	54.981	658	4012.9	4030.7	599.98	37.518	-0.003	-1.992
1_December_10_2014_30390656	255-1287	S4	69.6	50.268	565	4343.6	4555.7	480.32	41.208	0.0081	-1.877
1_December_10_2014_32200406	797-1857	S4	68.86	49.571	595	3954.8	4050.4	495.72	44.186	0.0108	-1.905
1_December_10_2014_32205515	1200-2280	S4	74.175	50.938	580	4415.6	4554.8	370.79	44.307	0.0043	-2.011
1_December_10_2014_32352765	3157-4245	S4	73.538	53.767	603.5	3250.1	3176.7	445.88	46.795	0.0015	-2.05
1_December_10_2014_32362937	186-1140	S4	73.232	60.5	565	3874.3	3799.1	440.01	49.131	0.0075	-1.242
1_December_10_2014_33231625	641-1671	S4	67.445	56.402	580	3620.2	3399	580.05	46.808	-0.018	-1.98
1_December_10_2014_33242062	1661-2699	S4	69.741	53.036	537	4060.7	4071	442.38	45.319	0.0001	-2.095
1_December_10_2014_33265937	1583-2619	S4	63.354	56.09	612	4074.6	4059.6	584.93	45.826	-0.002	-2.328
1_December_10_2014_33323687	1657-2657	S4	69.977	51.807	537	5146.2	5429.5	483.37	48.196	-0.006	-1.91
1_December_10_2014_33417046	993-2002	S4	62.857	50.682	648	4238.4	4463.1	399.06	54.52	0.0101	-1.764
1_December_10_2014_33422125	116-1138	S4	61.259	50.946	565	4398	4384.4	442.1	45.204	-0.009	-1.915
1_December_10_2014_33805000	1288-2205	S4	72.579	51.79	580	4898.3	5059.8	480.42	46.894	-0.005	-2.026
1_December_10_2014_33810093	416-1434	S4	69.643	54.424	551	3930.9	3882.8	443.86	42.773	0.0124	-1.935
1_December_10_2014_38365578	1251-2449	S4	65.385	59.238	596	4029.9	4106.5	567.13	43.523	0.0112	-2.019
1_December_10_2014_38444296	3009-4005	S4	75.59	50.469	565	4427	4544.2	392.34	62.282	-0.024	-2.155
1_December_10_2014_38496671	2070-3063	S4	75.61	48.733	551	4557.2	4424.1	292.98	58.022	0.0045	-1.941
	mean	S4	69.216	53.1451	581.525	4152.17	4183.04	466.837	46.027	0.001435	-1.93885
	SD		4.13169	3.14822	32.8255	427.587	521.11	75.6931	6.55355	0.00997567	0.205912
	C.V.		0.0596927	0.0592382	0.0564472	0.102979	0.124577	0.16214	0.142385	6.95169	-0.106203
1_December_10_2014_29923015	1863-2891	S5	123.8	56.641	787	3955.4	3750.1	334.2	45.315	-0.001	-1.895
1_December_10_2014_29929546	2-1015	S5	129.58	56.437	832	4242.6	4079.3	351.55	68.628	-0.001	-1.934
1_December_10_2014_30169328	274-1286	S5	126.27	59.288	816	4773.8	4772.6	384.4	50.26	0	-1.726
1_December_10_2014_30282109	208-1199	S5	121.42	60.369	791.5	3890.9	4585.7	368.31	59.006	-0.002	-1.842
1_December_10_2014_30390656	255-1287	S5	124.17	53.524	612	4380.9	4212.3	377.89	38.768	-0.01	-2.153
1_December_10_2014_32200406	797-1857	S5	122.46	53.776	668	4277.4	4229.7	347.28	46.012	-0.01	-2.079
1_December_10_2014_32205515	1200-2280	S5	120.17	54.411	832	4720.6	4128.4	371.14	48.336	-0.004	-2.104
1_December_10_2014_32352765	3157-4245	S5	133.86	55.732	537	3673.2	3359.1	374.82	61.393	0.0188	-1.857
1_December_10_2014_32362937	186-1140	S5	124.71	62.187	1470	4909.6	4382	367.47	54.679	-0.01	-1.549
1_December_10_2014_33231625	641-1671	S5	125.67	60.991	1160	4293.1	4088.8	357.54	61.194	-0.004	-1.857
1_December_10_2014_33242062	1661-2699	S5	125.83	57.115	712	4626.8	4776.1	352.44	43.333	-0.003	-2.129
1_December_10_2014_33265937	1583-2619	S5	125.27	59.987	801.5	3860.4	4321.5	376.79	50.256	0.0038	-1.833
1_December_10_2014_33323687	1657-2657	S5	116.77	54.679	639	4875.1	4755.5	323.3	41.675	0.005	-1.654
1_December_10_2014_33417046	993-2002	S5	126.38	53.875	816	4803.4	4995.3	344.92	38.827	-0.008	-1.924
1_December_10_2014_33422125	116-1138	S5	127.19	54.443	605	4823.2	4241.2	314.44	37.666	-0.002	-2.188
1_December_10_2014_33805000	1288-2205	S5	130.67	55.027	723	4522.7	4543.9	354.86	48.037	-0.001	-1.895
1_December_10_2014_33810093	416-1434	S5	126.47	58.104	689	4275.6	4177.1	352.38	59.043	0.0025	-1.857
1_December_10_2014_38365578	1251-2449	S5	130.34	61.066	817.5	4678.3	4581	328.39	38.128	0.0067	-1.833
1_December_10_2014_38444296	3009-4005	S5	121.27	53.606	630	4769.6	4723.5	340.53	45.082	0.0027	-2.141
1_December_10_2014_38496671	2070-3063	S5	123.7	53.082	658	4911.4	4826.7	338.23	46.888	-0.004	-1.87
	mean	S5	125.3	56.717	779.825	4463.2	4376.49	353.044	49.1263	-0.001025	-1.916
	SD		3.96147	2.97525	209.562	389.012	400.631	19.5299	8.90866	0.00673677	0.171767
	C.V.		0.0316159	0.0524578	0.26873	0.0871599	0.0915415	0.0553186	0.181342	-6.57246	-0.0896489
1_December_10_2014_29923015	1863-2891	S6	79.32	55.798	760	3675.5	3671.7	354	53.262	0.0075	-2.191
1_December_10_2014_29929546	2-1015	S6	76.25	56.318	816	3691.5	3998.7	419.7	55.302	0.0279	-2.046
1_December_10_2014_30169328	274-1286	S6	77.23	60.486	787	3920.4	3806.2	331.75	54.478	0.006	-2.137
1_December_10_2014_30282109	208-1199	S6	89.743	61.22	816	3833	3669.6	448.26	57.32	0.0358	-2.023
1_December_10_2014_30390656	255-1287	S6	85.17	53.662	760	3320.6	3111.8	334.18	35.319	0.0077	-2.409
1_December_10_2014_32200406	797-1857	S6	81.28	53.975	760	3588	3850	356.6	46.261	-0.003	-2.37
1_December_10_2014_32205515	1200-2280	S6	78.83	53.37	760	3555.7	3396.7	288.38	38.839	-0.006	-2.361
1_December_10_2014_32352765	3157-4245	S6	77.346	56.691	668	4214.5	4153.9	339.06	46.862	0.0035	-1.474
1_December_10_2014_32362937	186-1140	S6	75.4	60.185	787	3877.9	3987	478.6	71.873	0.0167	-2.189
1_December_10_2014_33231625	641-1671	S6	80.839	60.976	787	3870.9	3945.7	391.74	54.584	-0.005	-2.328
1_December_10_2014_33242062	1661-2699	S6	81.82	55.684	735	3582.9	3581	349.82	45.234	0.0016	-2.538
1_December_10_2014_33265937	1583-2619	S6	83.818	59.892	787	3991	4028.3	449.92	55.594	0.006	-2.084
1_December_10_2014_33323687	1657-2657	S6	89.59	55.475	630	3595.2	3182.7	344.43	42.162	0.0122	-1.825
1_December_10_2014_33417046	993-2002	S6	87.45	55.119	787	4763.3	4129.9	369.5	66.301	0.0123	-2.102
1_December_10_2014_33422125	116-1138	S6	84.279	56.145	787	4573.2	4077.7	372.62	65.475	0.006	-2.393
1_December_10_2014_33805000	1288-2205	S6	81.836	56.558	787	3896.1	3794.6	302.43	39.981	0.0088	-2.25
1_December_10_2014_33810093	416-1434	S6	79.727	58.513	816	3908	4012.1	355.28	48.748	0.0159	-2.404
1_December_10_2014_38365578	1251-2449	S6	81.514	59.897	787	4299.5	4476.2	383.93	53.778	-0.004	-2.149
1_December_10_2014_38444296	3009-4005	S6	79.522	53.712	648	4149.2	4421.2	322.6	48.682	-0.001	-2.333
1_December_10_2014_38496671	2070-3063	S6	95.84	55.579	668	3691.3	3524.6	233.4	37.415	0.0257	-2.098
	mean	S6	82.3402	56.9628	756.65	3899.88	3840.98	361.31	50.8735	0.00873	-2.1852
	SD		5.16455	2.63337	57.1298	356.605	362.063	57.8064	9.88746	0.0113112	0.239164
	C.V.		0.0627221	0.0462297	0.0755037	0.0914398	0.0942631	0.159991	0.194354	1.29566	-0.109447
1_December_10_2014_29923015	1863-2891	S7	54.75	58.041	501	4301.1	4412.3	969.4	32.545	0.0132	-1.785
1_December_10_2014_29929546	2-1015	S7	51.36	58.58	501	4058.8	3620	933.4	29.471	0.0073	-1.728
1_December_10_2014_30169328	274-1286	S7	55.73	60.607	501	4090.4	4069.7	866.08	38.083	0.011	-1.647
1_December_10_2014_30282109	208-1199	S7	54.814	62.88	525	3828.8	3523.6	856.59	33.145	0.0107	-1.861
1_December_10_2014_30390656	255-1287	S7	47.891	54.591	501	4389.2	3980.9	991.6	28.641	0.0272	-1.84
1_December_10_2014_32200406	797-1857	S7	61.872	55.434	501	3745.7	4094.2	908.2	29.42	0.0167	-2.102
1_December_10_2014_32205515	1200-2280	S7	61.426	57.842	501	3590.5	4003.7	939.93	30.557	0.0096	-1.866
1_December_10_2014_32352765	3157-4245	S7	51.162	59.432	501	4685.6	4451.5	869.5	48.857	0.0255	-1.682
1_December_10_2014_32362937	186-1140	S7	56.47	61.494	501	3796.7	4067.4	864.07	36.394	0.0175	-1.779
1_December_10_2014_33231625	641-1671	S7	53.77	61.692	501	3681.3	3631.9	859.7	33.55	0.0266	-1.872
1_December_10_2014_33242062	1661-2699	S7	61.59	56.093	501	4584.1	4336.5	888.38	32.277	0.0037	-1.946
1_December_10_2014_33265937	1583-2619	S7	59.63	60.395	512	4742.2	3884.5	866.03	39.381	-0.008	-1.805
1_December_10_2014_33323687	1657-2657	S7	54.85	55.948	501	3606.4	3646.2	785.51	30.922	0.0148	-1.945
1_December_10_2014_33417046	993-2002	S7	51.832	56.017	512	4497.9	4323.2	915.51	32.003	0.0142	-1.782
1_December_10_2014_33422125	116-1138	S7	54.5	57.194	512	4371.2	3872.6	956.3	37.757	0.0082	-1.942
1_December_10_2014_33805000	1288-2205	S7	56.7	58.838	512	4515.1	4621.6	941.87	28.905	0.0231	-2.077
1_December_10_2014_33810093	416-1434	S7	54.385	58.585	501	4662.4	4111.6	829.86	28.974	0.0079	-2.081
1_December_10_2014_38365578	1251-2449	S7	55.473	63.609	512	3664	3390.5	851.12	36.205	0.021	-1.716
1_December_10_2014_38444296	3009-4005	S7	55.743	54.49	501	4457.8	4718.9	899.67	34.129	0.0144	-2.049
1_December_10_2014_38496671	2070-3063	S7	48.98	58.516	512	4108.8	3603.5	854.9	27.397	0.0075	-1.806
	mean	S7	55.1464	58.5139	505.5	4168.9	4018.21	892.381	33.4307	0.013605	-1.86555
	SD		3.88227	2.66601	6.87099	399.269	377.632	51.6092	5.03127	0.00859097	0.135908
	C.V.		0.0703994	0.0455619	0.0135925	0.0957733	0.09398	0.0578332	0.150499	0.631457	-0.0728515
1_December_10_2014_29923015	1863-2891	S8	170.5	62.66	648	4621.8	4207.4	514.47	28.244	-0.011	-1.932
1_December_10_2014_29929546	2-1015	S8	168.75	61.339	613	4054.4	4122.9	539.73	32.836	-0.025	-2.133
1_December_10_2014_30169328	274-1286	S8	170.28	65.328	665	4031.2	3810.2	402.98	35.841	-0.007	-2.091
1_December_10_2014_30282109	208-1199	S8	163.79	65.872	659	3710.3	3668.5	524.04	31.409	5.6333	-1.948
1_December_10_2014_30390656	255-1287	S8	161.3	60.307	741	3859	3595.7	376.46	26.551	0.0051	-1.896
1_December_10_2014_32200406	797-1857	S8	170.59	60.033	671	3967.8	4004.1	446.19	29.041	-0.003	-2.083
1_December_10_2014_32205515	1200-2280	S8	171.6	62.885	691	4060.9	4032.7	405.82	26.799	-0.006	-2.14
1_December_10_2014_32352765	3157-4245	S8	156.4	65.221	749	3771.8	4123.4	409.86	31.719	-0.003	-1.806
1_December_10_2014_32362937	186-1140	S8	169.65	63.709	679	3961	3908.9	469.23	29.89	-0.003	-2.034
1_December_10_2014_33231625	641-1671	S8	162.69	67.736	610	4498.9	3915.6	438.21	35.392	0.0046	-1.88
1_December_10_2014_33242062	1661-2699	S8	164.37	62.981	722	4648.1	4380.5	420.43	26.554	-0.015	-2.086
1_December_10_2014_33265937	1583-2619	S8	168.61	65.435	593	4262.2	4106	498.11	33.636	-0.001	-1.985
1_December_10_2014_33323687	1657-2657	S8	158.26	60.851	582	4611.6	4149.3	474.21	25.334	0.0023	-2.184
1_December_10_2014_33417046	993-2002	S8	166.62	60.247	699	4697.6	4372.1	404.96	28.83	-0.009	-2.32
1_December_10_2014_33422125	116-1138	S8	163.2	62.131	697	4876.4	4457.6	408.43	31.256	-0.011	-2.058
1_December_10_2014_33805000	1288-2205	S8	163.57	61.201	688	4815.5	4192.1	494.16	28.621	-0.015	-2.168
1_December_10_2014_33810093	416-1434	S8	171.84	61.66	650	3793.6	3647.2	419.63	32.062	-0.014	-2.318
1_December_10_2014_38365578	1251-2449	S8	166.9	66.771	643	4308.6	4446.4	483.91	48.65	-0.001	-2.072
1_December_10_2014_38444296	3009-4005	S8	165.53	60.353	622	3642.4	3998.6	491.86	30.977	-0.007	-2.195
1_December_10_2014_38496671	2070-3063	S8	162.3	59.223	698	4156.6	4105.1	409.82	27.864	-0.003	-2.254
	mean	S8	165.838	62.7972	666	4217.49	4062.22	451.625	31.0753	0.275565	-2.07915
	SD		4.43536	2.50326	46.7085	392.593	253.364	48.2663	5.07062	1.2611	0.141944
	C.V.		0.0267452	0.0398627	0.0701329	0.0930871	0.0623708	0.106872	0.163172	4.57642	-0.0682703
		syllable	Duration	Amplitude	Pitch	Mean freq	Peak_freq	Goodness	FM	AM	Entropy
	C.V.	S1	0.0426729	0.0743209	0.0466066	0.187345	0.229837	0.0779225	0.204634	1.61187	-0.0772539
		S2	0.0852107	0.108779	0.0343616	0.217442	0.286799	0.18789	0.19579	0.173483	-0.122642
		S3	0.0458476	0.0710324	0.0329051	0.113191	0.104444	0.0835228	0.136873	4.25774	-0.0866936
		S4	0.0596927	0.0592382	0.0564472	0.102979	0.124577	0.16214	0.142385	6.95169	-0.106203
		S5	0.0316159	0.0524578	0.26873	0.0871599	0.0915415	0.0553186	0.181342	-6.57246	-0.0896489
		S6	0.0627221	0.0462297	0.0755037	0.0914398	0.0942631	0.159991	0.194354	1.29566	-0.109447
		S7	0.0703994	0.0455619	0.0135925	0.0957733	0.09398	0.0578332	0.150499	0.631457	-0.0728515
		S8	0.0267452	0.0398627	0.0701329	0.0930871	0.0623708	0.106872	0.163172	4.57642	-0.0682703
			0.0531133	0.0621853	0.0747849	0.123552	0.135976	0.111436	0.171131	1.61573	-0.0916263

## Sheet: yellow 23
duration	song file	syllable	Duration	Amplitude	Pitch	Mean freq	Peak_freq	Goodness	FM	AM	Entropy
3657-4662	2_May_12_2015_28925406.wav	S1	57.426	46.621	689	3776.1	3752.2	377.67	46.599	0.0081	-1.423
237-1129	2_May_12_2015_29070984.wav	S1	57.22	47.519	723	4167.9	4343.4	382.63	51.58	-0.001	-1.506
1196-2073	2_May_12_2015_30013453.wav	S1	51.836	48.223	711	4930.1	4429.2	459.58	46.332	-0.001	-1.234
804-1688	2_May_12_2015_30829906.wav	S1	48.742	49.019	711	3931.1	3407.7	361.2	46.119	0.0189	-1.353
3753-4793	2_May_12_2015_34839890.wav	S1	64.931	45.993	723	3577	3379.6	563.41	43.573	-0.001	-1.313
2262-2972	2_May_12_2015_35472187.wav	S1	47.638	47.395	668	3974.5	3378.7	476.91	53.409	0.0061	-1.2
2745-3752	2_May_12_2015_35792203.wav	S1	56.836	48.177	689	5265.2	4728.5	335.75	51.594	0.0049	-1.179
736-1453	2_May_12_2015_36232796.wav	S1	51.369	49.448	711	3787.4	3035.3	411.48	53.929	0.005	-1.49
3576-4703	2_May_12_2015_36527609.wav	S1	57.258	47.665	668	4413.3	4116.3	429.65	51.083	0.0052	-1.199
1450-2589	2_May_12_2015_36932343.wav	S1	54.374	49.15	711	4320.9	4094.6	419.79	56.498	-0.006	-1.198
2698-4013	2_May_12_2015_37739890.wav	S1	52.735	46.637	711	4297.7	3651.3	407.24	57.513	0.0033	-1.155
2274-3150	2_May_12_2015_39556281.wav	S1	47.926	49.372	711	3660.5	3358.2	391.2	59.268	0.0157	-1.469
3563-4607	2_May_12_2015_39865828.wav	S1	52.417	48.475	648	5212.1	5111	315.92	49.411	0.0043	-1.561
2720-3437	2_May_12_2015_40261406.wav	S1	53.682	45.529	648	3762	3616.6	421.1	56.254	0.0072	-1.192
1918-2678	2_May_12_2015_40556453.wav	S1	52.794	50.011	678.5	4530.7	4263.5	481.61	49.507	0.0164	-1.282
1807-2957	2_May_12_2015_41116390.wav	S1	50.936	49.027	689	5071.2	4700.9	386.91	51.576	0	-0.893
899-1768	2_May_12_2015_41560656.wav	S1	63.4	46.22	760	3419.1	2833.4	451.83	45.481	0.0022	-1.325
388-1408	2_May_12_2015_42524687.wav	S1	56.779	47.108	630	5948.9	6357.1	415.7	46.463	0.0016	-0.951
2761-3644	2_May_12_2015_42880609.wav	S1	59.471	48.194	711	4386.6	4366	347.16	56.755	-0.009	-1.071
2429-3319	2_May_12_2015_43068781.wav	S1	62.826	48.177	668	5085	4742.5	330.27	44.926	-0.015	-0.886
	mean		55.0298	47.898	692.925	4375.86	4083.3	408.35	50.8935	0.003295	-1.244
	SD		4.99875	1.26019	31.3798	682.223	824.237	59.6802	4.75588	0.00816929	0.195358
	C.V.		0.0908372	0.0263098	0.045286	0.155906	0.201856	0.146149	0.0934477	2.4793	-0.15704
237-1129	2_May_12_2015_29070984.wav	S2	71.542	45.192	711	4554.7	4411.4	397.31	38.447	0.0113	-1.681
1196-2073	2_May_12_2015_30013453.wav	S2	70.328	46.035	689	4558.4	4526.2	327.23	30.074	0.0015	-1.918
804-1688	2_May_12_2015_30829906.wav	S2	68.81	47.628	711	4553.3	4547.5	412.46	39.857	0.0004	-1.691
2262-2972	2_May_12_2015_35472187.wav	S2	82.16	45.313	724.5	4900.3	4677.2	381.44	46.609	-0.006	-1.716
2274-3150	2_May_12_2015_39556281.wav	S2	77.83	47.567	711	4260.6	4365.3	438.07	35.972	-0.002	-2.061
2720-3437	2_May_12_2015_40261406.wav	S2	83.8	45.244	689	3965.7	3651.9	420.1	37.022	-0.007	-1.803
1918-2678	2_May_12_2015_40556453.wav	S2	85.442	47.643	711	4685.7	4872.1	454.3	37.485	-0.023	-1.295
2761-3644	2_May_12_2015_42880609.wav	S2	68.942	48.037	711	4830.5	4827.2	442.27	45.658	0.0135	-1.339
2429-3319	2_May_12_2015_43068781.wav	S2	71.746	48.247	711	4170	3877.7	353.25	38.04	-0.009	-1.882
3657-4662	2_May_12_2015_28925406.wav	S2-A	78.625	48.249	735	5021	4982.3	396.93	35.725	0.0109	-1.903
3753-4793	2_May_12_2015_34839890.wav	S2-A	74.721	45.078	689	4324.3	3735.5	429.95	36.904	-1.204	-1.578
2745-3752	2_May_12_2015_35792203.wav	S2-A	71.462	48.413	711	4585.3	4639.8	425.38	37.304	-0.01	-1.796
736-1453	2_May_12_2015_36232796.wav	S2-A	71.957	49.412	747.5	4557.2	3980.3	392.95	37.909	0.0046	-1.585
3576-4703	2_May_12_2015_36527609.wav	S2-A	73.268	46.363	689	4945.6	4792.9	437.37	36.208	0.0009	-1.461
1450-2589	2_May_12_2015_36932343.wav	S2-A	76.375	46.842	711	4099.8	3787.5	451.51	47.172	0.0012	-1.994
2698-4013	2_May_12_2015_37739890.wav	S2-A	73.274	47	711	4232.2	3939.3	415.94	37.168	0.0061	-1.842
3563-4607	2_May_12_2015_39865828.wav	S2-A	75.8	47.781	711	4560.6	4098.1	422.39	38.082	-0.001	-1.83
1807-2957	2_May_12_2015_41116390.wav	S2-A	73.426	44.472	760	4150.3	4062.8	426.05	44.249	0.001	-1.707
899-1768	2_May_12_2015_41560656.wav	S2-A	63.116	47.003	711	4724.8	4566.3	354.78	31.923	-0.028	-1.385
388-1408	2_May_12_2015_42524687.wav	S2-A	84.48	45.492	711	5203.8	5463.9	490.14	45.088	0.0049	-1.747
3657-4662	2_May_12_2015_28925406.wav	S2-B	69.27	45.641	689	3615.6	3215.4	332.38	39.241	0.0079	-2.378
3753-4793	2_May_12_2015_34839890.wav	S2-B	71.384	48.968	760	4220.7	3966.8	441.3	40.419	-0.007	-1.706
2745-3752	2_May_12_2015_35792203.wav	S2-B	72.74	46.4	735	4612.3	4642.6	426.23	48.315	0.0138	-1.904
736-1453	2_May_12_2015_36232796.wav	S2-B	66.8	49.105	747.5	4367.7	4582.3	438.73	43.484	-0.005	-2.108
3576-4703	2_May_12_2015_36527609.wav	S2-B	65.736	46.972	787	5023.2	5154.8	267.37	49.84	-0.003	-1.661
1450-2589	2_May_12_2015_36932343.wav	S2-B	70.952	46.49	689	4475.5	4076.7	401.49	38.476	-0.015	-1.271
2698-4013	2_May_12_2015_37739890.wav	S2-B	79.725	46.569	689	4657.8	4711.6	359.38	37.402	0.0011	-1.96
3563-4607	2_May_12_2015_39865828.wav	S2-B	72.168	44.904	711	5035.3	5123.1	449.44	41.734	0.0004	-1.596
1807-2957	2_May_12_2015_41116390.wav	S2-B	82.835	48.646	723	4799.4	4659.4	448.93	37.26	0.0009	-1.78
899-1768	2_May_12_2015_41560656.wav	S2-B	71.7	45.11	668	3609.4	3455.4	403.7	40.72	-0.003	-1.574
388-1408	2_May_12_2015_42524687.wav	S2-B	70.74	44.307	668	4806.5	4920	421.01	31.43	-0.011	-1.28
3576-4703	2_May_12_2015_36527609.wav	S2-C	85.278	47.518	711	4157.3	4052.7	396	42.905	0.006	-1.861
1450-2589	2_May_12_2015_36932343.wav	S2-C	79.836	47.397	711	4407.3	4664.9	409.9	42.755	0.003	-2.199
2698-4013	2_May_12_2015_37739890.wav	S2-C	68.472	45.831	711	3892.4	3655	457.05	40.849	-0.009	-1.347
1807-2957	2_May_12_2015_41116390.wav	S2-C	78.493	47.735	711	4480.6	4559.5	426.96	42.778	-0.008	-2.043
899-1768	2_May_12_2015_41560656.wav	S2-C	79.648	44.834	689	3904.8	3510.1	376.53	39.218	-0.012	-1.567
2698-4013	2_May_12_2015_37739890.wav	S2-D	87.328	45.958	711	4069.4	4175.2	407.62	46.436	-0.008	-2.564
	mean		74.8705	46.7404	712.581	4459.98	4349.48	409.023	40.0043	-0.0346378	-1.75711
	SD		6.10159	1.40599	24.8318	394.717	532.306	42.9876	4.64582	0.197795	0.296667
	C.V.		0.0814953	0.0300808	0.0348477	0.0885019	0.122384	0.105098	0.116133	-5.71036	-0.168838
3657-4662	2_May_12_2015_28925406.wav	S3	109.47	47.719	580	4305.3	4223.7	396.26	37.254	0.0079	-1.502
237-1129	2_May_12_2015_29070984.wav	S3	110.72	46.351	551	4632.1	4696.1	415.2	32.382	-0.002	-1.494
1196-2073	2_May_12_2015_30013453.wav	S3	107.87	46.874	580	5095.1	5192.2	347.6	36.877	0.0025	-1.538
804-1688	2_May_12_2015_30829906.wav	S3	120.36	47.215	595	4242.8	4280.3	404.52	34.906	-0.002	-1.823
3753-4793	2_May_12_2015_34839890.wav	S3	121.74	49.341	612	4035.8	3985.4	393.32	34.908	0.0035	-1.678
2262-2972	2_May_12_2015_35472187.wav	S3	114.53	47.98	580	5082.7	5185.1	371.88	43.033	0.0042	-1.395
2745-3752	2_May_12_2015_35792203.wav	S3	116.66	47.128	595	4203.1	4129.4	422.85	37.45	-0.001	-1.7
736-1453	2_May_12_2015_36232796.wav	S3	106.92	50.261	595	3891.5	3633.2	387.21	34.081	0.0071	-1.808
3576-4703	2_May_12_2015_36527609.wav	S3	108.62	48.663	580	4323.5	4363.1	391.11	31.773	-0.003	-1.64
1450-2589	2_May_12_2015_36932343.wav	S3	122.2	46.51	565	3876	3706.6	314.9	32.057	-0.002	-2.296
2698-4013	2_May_12_2015_37739890.wav	S3	127.53	46.08	595	3941.5	3865.5	403.12	38.78	-0.003	-1.244
2274-3150	2_May_12_2015_39556281.wav	S3	118.6	49.234	580	4355.3	4443.5	364.83	36.412	0.0007	-2.168
3563-4607	2_May_12_2015_39865828.wav	S3	106.77	46.317	711	4642.8	4931.1	405.54	40.799	-0.003	-2.232
2720-3437	2_May_12_2015_40261406.wav	S3	110.26	46.584	565	4090.4	4045.5	352.22	33.33	0.0023	-1.619
1918-2678	2_May_12_2015_40556453.wav	S3	71.836	47.436	689	3964.2	3698.3	361.02	36.777	-0.017	-1.929
1807-2957	2_May_12_2015_41116390.wav	S3	119.35	47.6	580	4421.8	4599	390.39	35.152	-0.001	-1.431
899-1768	2_May_12_2015_41560656.wav	S3	112.7	47.801	595	3592.2	3261.1	344.08	39.063	0.0064	-1.916
388-1408	2_May_12_2015_42524687.wav	S3	118.42	46.847	595	4819.9	4762.2	447.6	35.115	-0.004	-1.597
2761-3644	2_May_12_2015_42880609.wav	S3	103.58	48.567	668	4857.9	4998.1	356.5	42.113	-0.01	-1.401
2429-3319	2_May_12_2015_43068781.wav	S3	121.35	48.646	565	4959.9	5059.2	360.35	36.201	0.0022	-1.214
	mean		112.474	47.6577	598.8	4366.69	4352.93	381.525	36.4232	-0.00056	-1.68125
	SD		11.5555	1.15399	42.0571	437.364	566.423	31.6694	3.16109	0.00580503	0.308151
	C.V.		0.102739	0.0242142	0.0702356	0.100159	0.130124	0.0830074	0.0867879	-10.3661	-0.183287
3657-4662	2_May_12_2015_28925406.wav	S4	218.47	53.94	958	4643.6	4596	210.59	45.248	-0.006	-2.192
237-1129	2_May_12_2015_29070984.wav	S4	214.6	52.491	787	4813.1	4632.3	244.48	46.526	0	-1.94
1196-2073	2_May_12_2015_30013453.wav	S4	212.67	53.271	938	4796.9	4820	226.79	48.61	0.0015	-2.21
804-1688	2_May_12_2015_30829906.wav	S4	217.44	53.091	816	4859.5	4826.8	211.16	45.958	0.0031	-2.023
3753-4793	2_May_12_2015_34839890.wav	S4	216.32	55.313	918	4523.5	4270.6	216.7	45.221	-0.003	-2.233
2262-2972	2_May_12_2015_35472187.wav	S4	220.82	53.829	882	5024	5013.6	204.7	43.085	-0.001	-2.206
2745-3752	2_May_12_2015_35792203.wav	S4	211.72	54.015	848	5404.5	5652.4	218.7	47.464	-0.006	-1.782
736-1453	2_May_12_2015_36232796.wav	S4	204.53	56.811	1002	4619.8	4731.4	217.81	49.704	-0.007	-2.215
3576-4703	2_May_12_2015_36527609.wav	S4	198.37	53.769	938	4597.4	4621.5	227.3	47.22	-5.025	-1.901
1450-2589	2_May_12_2015_36932343.wav	S4	215.59	53.262	918	4634.4	4687	212.18	46.774	-0.003	-1.983
2698-4013	2_May_12_2015_37739890.wav	S4	214.75	53.385	865	4400.1	4287.4	228.04	48.686	-0.009	-2.016
2274-3150	2_May_12_2015_39556281.wav	S4	227.46	54.154	1102	4282.8	4389.1	234.89	49.426	-0.006	-2.381
3563-4607	2_May_12_2015_39865828.wav	S4	212.54	51.523	882	4479.6	4463.9	230.41	48.465	0.004	-1.947
2720-3437	2_May_12_2015_40261406.wav	S4	225.72	51.731	1002	4293.2	4368.3	214.48	48.335	0	-2.076
1918-2678	2_May_12_2015_40556453.wav	S4	118.73	48.302	580	4342.2	4425.6	432.21	38.01	-0.002	-1.857
1807-2957	2_May_12_2015_41116390.wav	S4	216.5	53.428	1337.5	4216.6	3991.6	245.48	48.569	-0.004	-2.182
899-1768	2_May_12_2015_41560656.wav	S4	219.42	52.775	848	4676.9	4838.3	220.82	48.219	-0.005	-1.994
388-1408	2_May_12_2015_42524687.wav	S4	232.7	51.833	1050	4920.8	4955.8	222.87	46.171	-0.009	-2.111
2761-3644	2_May_12_2015_42880609.wav	S4	221.37	54.22	1102	4798	4873.5	214.52	47.455	-0.002	-2.084
2429-3319	2_May_12_2015_43068781.wav	S4	220.49	54.289	1102	4547.4	4663.2	252.06	53.047	-0.019	-2.1
	mean		212.011	53.2716	943.775	4643.72	4655.42	234.31	47.1097	-0.25492	-2.07165
	SD		23.2013	1.68724	154.785	286.823	350.116	48.263	2.97122	1.12277	0.148673
	C.V.		0.109435	0.0316724	0.164006	0.0617659	0.0752062	0.20598	0.0630703	-4.40441	-0.0717656
3657-4662	2_May_12_2015_28925406.wav	S5	53.226	49.612	525	4049.9	3628.1	691.39	40.126	-0.012	-1.694
237-1129	2_May_12_2015_29070984.wav	S5	52.374	51.6	537	4637.9	4536.9	672.43	38.94	0.0079	-1.916
1196-2073	2_May_12_2015_30013453.wav	S5	56.749	49.933	537	4016.3	3671.6	684.66	36.427	0.0015	-1.949
804-1688	2_May_12_2015_30829906.wav	S5	50.926	54.043	525	4667.1	4117.3	598.51	46.127	0.0083	-1.849
3753-4793	2_May_12_2015_34839890.wav	S5	59.375	52.466	537	4151.6	3977.4	830.5	33.8	-0.011	-1.933
2262-2972	2_May_12_2015_35472187.wav	S5	49.947	51.928	501	4639.9	4506.4	1025.3	36.54	-0.001	-1.803
2745-3752	2_May_12_2015_35792203.wav	S5	57.615	52.444	512	4831.7	4939	729.05	35.942	0.0027	-1.879
736-1453	2_May_12_2015_36232796.wav	S5	49.394	51.916	525	4300.9	4307.5	857.48	37.91	0.0095	-1.755
3576-4703	2_May_12_2015_36527609.wav	S5	47.9	50.791	512	3811.2	3168	873.52	30.991	-0.025	-1.361
1450-2589	2_May_12_2015_36932343.wav	S5	53.635	52.189	525	4586.2	4841	869.01	37.21	-0.003	-1.613
2698-4013	2_May_12_2015_37739890.wav	S5	44.99	51.232	501	4892.1	4995.7	866.52	38.528	0.0056	-1.593
2274-3150	2_May_12_2015_39556281.wav	S5	52.475	48.952	501	4920.1	4772.2	646.91	42.341	-0.023	-1.448
3563-4607	2_May_12_2015_39865828.wav	S5	58.926	51.573	501	3567.1	3312	714.88	39.145	-0.013	-2.215
2720-3437	2_May_12_2015_40261406.wav	S5	61.37	50.365	537	4176.4	3541.3	719.85	34.963	-0.005	-1.668
1918-2678	2_May_12_2015_40556453.wav	S5	45.85	54.279	1002	4819.5	4792.8	209.32	49.479	-0.011	-2.143
1807-2957	2_May_12_2015_41116390.wav	S5	50.47	51.656	512	4669.5	4505.9	680.12	35.974	-0.003	-1.687
388-1408	2_May_12_2015_42524687.wav	S5	59.385	49.388	512	4435.7	4517.1	711.29	31.998	-0.016	-1.922
2761-3644	2_May_12_2015_42880609.wav	S5	51.637	52.678	537	4882.5	5131.5	672.43	44.607	-0.008	-1.655
2429-3319	2_May_12_2015_43068781.wav	S5	55.7	52.423	501	5259.7	5611.2	750.75	39.735	0.0031	-1.571
	mean		53.2602	51.5509	544.211	4490.28	4361.73	726.522	38.4623	-0.00486316	-1.77126
	SD		4.74481	1.45125	111.752	435.752	666.431	163.463	4.66576	0.0102624	0.21889
	C.V.		0.0890874	0.0281518	0.205347	0.0970434	0.15279	0.224993	0.121307	-2.11023	-0.123578
3657-4662	2_May_12_2015_28925406.wav	S6	133.22	56.974	711	4220	4141.5	483.34	31.531	-0.01	-2.855
237-1129	2_May_12_2015_29070984.wav	S6	149.84	59.595	711	4413.5	4472.8	536.71	29.27	-0.002	-2.982
1196-2073	2_May_12_2015_30013453.wav	S6	140.49	55.217	711	4077.1	4174.3	502.57	29.613	-0.001	-2.016
804-1688	2_May_12_2015_30829906.wav	S6	131.27	57.438	711	4182.7	4079.4	591.42	28.135	-0.002	-2.942
3753-4793	2_May_12_2015_34839890.wav	S6	155.53	58.967	711	4026.1	3987	518.15	33.015	-0.009	-2.811
2745-3752	2_May_12_2015_35792203.wav	S6	159.96	57.799	689	4167.5	4099.1	582.73	32.608	-0.004	-2.377
3576-4703	2_May_12_2015_36527609.wav	S6	157.38	57.076	711	4107	4064.7	568.65	33.675	-0.005	-2.065
1450-2589	2_May_12_2015_36932343.wav	S6	130.74	60.347	689	4091.5	4136.9	592.03	32.399	-0.011	-3.208
2698-4013	2_May_12_2015_37739890.wav	S6	132.83	57.612	689	4452.6	4486.3	567.8	29.166	-0.006	-2.025
2274-3150	2_May_12_2015_39556281.wav	S6	158.58	58.72	689	4394.8	4434	478.58	31.856	-0.008	-2.177
3563-4607	2_May_12_2015_39865828.wav	S6	134.15	56.437	711	4227.3	4297.9	621.59	36.785	-0.01	-2.342
1807-2957	2_May_12_2015_41116390.wav	S6	128.68	59.832	711	4166.9	4222	533.77	34.878	-0.01	-3.006
388-1408	2_May_12_2015_42524687.wav	S6	132.85	53.494	689	4009.7	3839.5	419.95	25.661	-0.007	-2.16
2761-3644	2_May_12_2015_42880609.wav	S6	137.62	60.118	711	4427.6	4442.6	479.66	32.146	-0.003	-3.303
2429-3319	2_May_12_2015_43068781.wav	S6	140.92	59.683	689	4500.1	4677.3	625.33	30.139	-0.004	-2.745
	mean		141.604	57.9539	702.2	4230.96	4237.02	540.152	31.3918	-0.00613333	-2.60093
	SD		11.4164	1.94668	11.156	164.837	225.792	59.5652	2.80336	0.00339888	0.452681
	C.V.		0.0806219	0.0335902	0.0158873	0.0389597	0.0532903	0.110275	0.0893024	-0.554165	-0.174046
	C.V.	syllable	Duration	Amplitude	Pitch	Mean freq	Peak_freq	Goodness	FM	AM	Entropy
		S1	0.0908372	0.0263098	0.045286	0.155906	0.201856	0.146149	0.0934477	2.4793	-0.15704
		S2	0.0814953	0.0300808	0.0348477	0.0885019	0.122384	0.165098	0.116133	-5.71036	-0.168838
		S3	0.102739	0.0242142	0.0702356	0.100159	0.130124	0.183007	0.0867879	-10.3661	-0.183287
		S4	0.109435	0.0316724	0.164006	0.0617659	0.0752062	0.20598	0.0630703	-4.40441	-0.171766
		S5	0.0890874	0.0281518	0.205347	0.0970434	0.15279	0.224993	0.121307	-2.11023	-0.123578
		S6	0.0806219	0.0335902	0.0158873	0.0389597	0.0532903	0.190275	0.0893024	-0.554165	-0.174046
		mean	0.0923692	0.0290032	0.0892682	0.0903893	0.122608	0.185917	0.0950082	-3.44433	-0.163092

## Sheet: yellow 29
song file	Duration	Syllable	Duration	Amplitude	Pitch	Mean freq	Peak_freq	Goodness	FM	AM	Entropy
3_May_09_2015_32721406	2498-3519	S1	48.82	55.173	537	3517	3112.2	1041.2	29.987	0.0114	-1.543
3_May_09_2015_33128437	2387-3390	S1	45.388	55.774	525	3743.2	3412.3	1005.1	35.289	0.0125	-1.681
3_May_09_2015_33193078	2971-3976	S1	44.24	53.658	537	4255.6	3661.5	966.67	27.586	0.0239	-1.607
3_May_09_2015_33397750	2101-3111	S1	46.186	55.101	537	3517.9	3111.9	1031.8	33.004	0.0091	-1.42
3_May_09_2015_33583937	1871-2888	S1	45.245	53.702	537	4839.4	5292.7	980.94	39.202	0.0091	-1.276
3_May_09_2015_33778640	1436-2447	S1	42.295	56.586	537	3791.5	3767.8	1091.7	34.369	0.0439	-1.732
3_May_09_2015_34001312	763-1795	S1	45.88	56.298	551	4162.2	3857	1100.8	35.337	0.0067	-1.364
3_May_09_2015_37022703	95-1135	S1	42.195	51.413	537	4776.1	4874.9	983.79	29.797	0.0239	-1.47
3_May_09_2015_37607546	868-1912	S1	43.25	54.831	537	4290	3804.1	1075.3	32.124	0.0297	-1.342
3_May_09_2015_37877953	1475-2512	S1	44.597	52.74	525	4783.8	4900.9	1041.3	36.619	0.0162	-1.222
3_May_09_2015_37986156	1677-2704	S1	44.791	54.732	537	4136.9	4033.2	871.25	30.336	0.0267	-1.692
3_May_09_2015_38458890	2898-3926	S1	46.486	54.546	537	4155.6	4378.9	1045.7	37.499	0.0053	-1.658
3_May_09_2015_39812203	2943-4004	S1	45.5	54.742	525	3696.5	2878.4	1111.7	31.075	0.0161	-1.341
3_May_09_2015_39941578	960-1980	S1	44.16	53.242	537	4407.2	4053	986.82	34.391	0.0246	-1.758
3_May_09_2015_40381531	1631-2635	S1	40.19	50.613	525	5380.5	5916.7	786.14	36.381	0.0204	-1.307
3_May_09_2015_40520531	3088-4109	S1	43.97	52.986	537	5094.2	5110.5	1075.3	38.257	0.0304	-1.554
3_May_09_2015_42715562	1173-2197	S1	46.886	55.366	537	3866.6	3631	961.32	35.627	0.0166	-1.634
3_May_09_2015_42753421	1463-2493	S1	47.8	53.229	525	4519.4	4573.4	937.02	35.417	-0.003	-1.575
3_May_09_2015_42806234	1973-2982	S1	44.9	54.386	537	3892.6	3467.3	837.09	36.613	0.0304	-1.415
3_May_09_2015_42811781	1564-2551	S1	39.909	49.758	512	4901.3	5056.7	895.99	44.827	0.0077	-1.579
	mean	S1	44.6344	53.9438	533.45	4286.38	4144.72	991.346	34.6869	0.01808	-1.5085
	SD		2.27142	1.80467	8.23647	540.336	832.139	90.164	3.9361	0.0112082	0.16344
	CV		0.0508895	0.0334546	0.01544	0.126059	0.200771	0.0909511	0.113475	0.61992	-0.108346
3_May_09_2015_32721406	2498-3519	S2	69.41	55.099	595	3961.2	4106	910.4	26.524	0.0057	-2.301
3_May_09_2015_33128437	2387-3390	S2	71.36	56.704	595	3931.8	3594.2	976.1	23.533	0.0094	-2.41
3_May_09_2015_33193078	2971-3976	S2	70.39	52.628	580	4114.9	3894.1	975.4	24.563	0.006	-2.069
3_May_09_2015_33397750	2101-3111	S2	76.325	56.44	595	3411	3164.5	1068.4	27.545	-0.007	-2.218
3_May_09_2015_33583937	1871-2888	S2	61.59	53.869	595	4147.2	4179.5	1067.2	16.548	-0.003	-2.24
3_May_09_2015_33778640	1436-2447	S2	70.349	56.014	595	3316.7	3379.1	940.76	23.35	0.0074	-2.444
3_May_09_2015_34001312	763-1795	S2	72.34	55.679	612	3442.9	3639.9	913.44	25.773	-0.012	-2.241
3_May_09_2015_37022703	95-1135	S2	67.645	52.161	595	3637.1	3870.2	1042.6	19.911	0.0045	-2.23
3_May_09_2015_37607546	868-1912	S2	69.741	52.323	595	3612.9	3557.6	1055.2	22.584	0.016	-2.152
3_May_09_2015_37877953	1475-2512	S2	71.536	54.154	595	3705	3747.9	955.4	21.147	-0.008	-2.241
3_May_09_2015_37986156	1677-2704	S2	73.132	53.056	595	4034.8	4367.9	942.84	21.49	0.0071	-2.215
3_May_09_2015_38458890	2898-3926	S2	70.8	54.3	595	3805.9	3866.7	859.21	27.057	0.0155	-2.609
3_May_09_2015_39812203	2943-4004	S2	73.732	54.752	580	4010.1	4137.2	1070.4	22.958	0.0002	-2.415
3_May_09_2015_39941578	960-1980	S2	77.523	52.912	595	4282.5	4514.7	934.51	24.869	0	-2.555
3_May_09_2015_40381531	1631-2635	S2	63.84	50.887	595	4205	4266.9	998.7	20.599	0.0034	-2.265
3_May_09_2015_40520531	3088-4109	S2	64.52	51.249	580	4695.5	4730	1040.9	27.178	0.0158	-2.25
3_May_09_2015_42715562	1173-2197	S2	70.639	55.154	580	4041	3910.5	976.4	20.398	0.0023	-2.332
3_May_09_2015_42753421	1463-2493	S2	66.74	54.049	580	3947.3	3855.7	996.1	21.083	0.0299	-2.253
3_May_09_2015_42806234	1973-2982	S2	66.428	54.857	595	4045.8	4189.1	1059.7	19.427	0.0275	-2.203
3_May_09_2015_42811781	1564-2551	S2	71.1	52.202	595	4436.8	4873	961.7	24.7	0	-2.279
	mean	S2	69.957	53.9245	592.1	3939.27	3992.23	987.268	23.0619	0.006035	-2.2961
	SD		3.97737	1.69585	8.09743	348.07	433.785	61.8239	2.99008	0.0108407	0.131339
	CV		0.0568545	0.0314486	0.0136758	0.088359	0.108657	0.0626212	0.129655	1.7963	-0.0572008
3_May_09_2015_32721406	2498-3519	S3	185.22	48.773	580	3303.3	3253.4	408.22	42.861	0.0012	-2.139
3_May_09_2015_33128437	2387-3390	S3	182.52	50.182	565	3625.3	3552.4	452.68	44.837	-0.002	-2.447
3_May_09_2015_33193078	2971-3976	S3	183.44	48.048	565	3620.9	3587.5	425.88	44.356	-0.003	-2.571
3_May_09_2015_33397750	2101-3111	S3	183.5	50.891	580	3162.9	3064.2	561.32	45.739	0.004	-2.185
3_May_09_2015_33583937	1871-2888	S3	173.61	47.368	580	4030.3	4024.3	429.47	45.634	-0.01	-2.267
3_May_09_2015_33778640	1436-2447	S3	181.38	49.36	565	2987	2724.3	501.48	43.594	0.0076	-2.411
3_May_09_2015_34001312	763-1795	S3	186.58	50.782	565	3096.4	2873	515.8	42.454	0.003	-2.166
3_May_09_2015_37022703	95-1135	S3	187.45	46.201	565	2912	2589.1	452.38	42.256	-0.007	-2.011
3_May_09_2015_37607546	868-1912	S3	192.57	46.359	565	3155.9	3001.5	487.52	44.041	-0.006	-2.271
3_May_09_2015_37877953	1475-2512	S3	181.23	47.34	565	3128.4	2872.8	468.06	46.162	-0.006	-2.046
3_May_09_2015_37986156	1677-2704	S3	188.5	47.593	565	3396.4	3229.7	368.27	43.401	0.0001	-2.029
3_May_09_2015_38458890	2898-3926	S3	181.25	49.334	565	3604.1	3542.6	518.3	47.649	0.0064	-2.345
3_May_09_2015_39812203	2943-4004	S3	191.57	49.599	565	3383.5	3073.9	441.74	44.01	0.001	-2.132
3_May_09_2015_39941578	960-1980	S3	180.6	48.337	565	3936.4	3982.8	392.19	44.27	-0.002	-2.508
3_May_09_2015_40381531	1631-2635	S3	176.6	45.668	565	4032.3	4116.6	454.46	43.989	-0.003	-2.109
3_May_09_2015_40520531	3088-4109	S3	172.61	47.284	551	4246.3	4296	435.24	45.67	-0.002	-2.459
3_May_09_2015_42715562	1173-2197	S3	185.58	50.167	558	3686.1	3571.7	452.71	42.787	-0.001	-2.589
3_May_09_2015_42753421	1463-2493	S3	177.56	50.235	565	3741.6	3587.7	445.45	48.126	-0.001	-2.109
3_May_09_2015_42806234	1973-2982	S3	181.3	50.102	565	3366.4	3392.7	399.89	45.189	-0.003	-2.197
3_May_09_2015_42811781	1564-2551	S3	174.7	48.181	572.5	3853	3892.6	433.99	46.768	0	-2.477
	mean	S3	182.388	48.5902	566.575	3513.43	3411.44	452.252	44.6896	-0.001135	-2.2734
	SD		5.55222	1.58636	6.98358	383.194	488.147	46.766	1.66521	0.00436738	0.187917
	CV		0.0304417	0.0326478	0.012326	0.109066	0.143091	0.103407	0.0372617	-3.84791	-0.0826591
3_May_09_2015_32721406	2498-3519	S4	64.852	51.94	537	4019.9	3948.9	552.22	46.166	0.0022	-2.084
3_May_09_2015_33128437	2387-3390	S4	59.24	52.533	524.5	4679.7	4731.2	585.23	42.936	-0.001	-1.831
3_May_09_2015_33193078	2971-3976	S4	59.83	47.864	551	4494	4466.8	517.38	41.98	-0.007	-1.795
3_May_09_2015_33397750	2101-3111	S4	63.139	51.331	531.5	3520	3535.9	607.35	44.291	0.0052	-2.238
3_May_09_2015_33583937	1871-2888	S4	57.22	48.274	565	4670.9	4578.5	461.42	42.455	0.0079	-1.888
3_May_09_2015_33778640	1436-2447	S4	58.75	51.498	518.5	4479.8	4426.9	617.51	37.296	0.0109	-1.754
3_May_09_2015_34001312	763-1795	S4	66.848	52.404	558	4014.3	3931.6	570.88	46.401	0.0033	-2.048
3_May_09_2015_37022703	95-1135	S4	59.25	46.446	612	4083.3	4211.7	503.78	41.325	-0.002	-1.873
3_May_09_2015_37607546	868-1912	S4	61.54	47.005	558	4018.5	4057.3	468.94	40.97	0.011	-1.924
3_May_09_2015_37877953	1475-2512	S4	58.166	49.347	538	4327.3	4324.8	550.13	37.427	0.0018	-2.119
3_May_09_2015_37986156	1677-2704	S4	57.68	50.066	565.5	4741.2	5065.9	512.61	40.945	-0.007	-1.972
3_May_09_2015_38458890	2898-3926	S4	58.846	51.021	525	4552.2	4424	596.24	44.429	-0.003	-2.259
3_May_09_2015_39812203	2943-4004	S4	67.845	50.217	580	4189.9	4213.5	473.77	42.217	-0.013	-2.421
3_May_09_2015_39941578	960-1980	S4	56.87	50.974	537	5154.5	5212.6	501.58	41.778	0.0103	-2.199
3_May_09_2015_40381531	1631-2635	S4	58.268	46.742	595	5237.1	5486.1	552.6	46.04	0.0108	-1.899
3_May_09_2015_40520531	3088-4109	S4	53.87	48.84	512	5226.6	5383.3	467.42	42.221	0.0023	-2.328
3_May_09_2015_42715562	1173-2197	S4	59.85	51.557	512	4588.8	4550.6	667.15	43.191	-0.002	-1.917
3_May_09_2015_42753421	1463-2493	S4	57.35	52.225	612	4853	4838.2	515.89	49.977	-0.013	-2.092
3_May_09_2015_42806234	1973-2982	S4	63.854	51.939	537	4452	4037.4	466.83	42.057	0.0153	-1.567
3_May_09_2015_42811781	1564-2551	S4	54.875	50.411	565	4845.1	4813	459.63	40.866	0.012	-2.434
	mean	S4	59.9072	50.1317	551.7	4507.41	4511.91	532.428	42.7484	0.00225	-2.0321
	SD		3.72127	1.9802	30.369	449.183	514.358	60.4632	2.95787	0.00829423	0.231562
	CV		0.0621172	0.0395	0.0550461	0.0996545	0.114	0.113561	0.0691926	3.68632	-0.113952
3_May_09_2015_32721406	2498-3519	S5	127.69	56.485	1225	4555.8	4398.4	278.54	46.366	0.0026	-2.224
3_May_09_2015_33128437	2387-3390	S5	131.23	55.115	1050	4409.8	4143.5	340.68	47.031	-0.004	-2.252
3_May_09_2015_33193078	2971-3976	S5	125.7	52.009	1696	4656.6	4696.1	357.22	51.232	-0.002	-2.324
3_May_09_2015_33397750	2101-3111	S5	131.18	54.932	1102	4031	3856.3	361.77	45.447	0.0022	-1.975
3_May_09_2015_33583937	1871-2888	S5	116.72	52.569	689	4881.1	4803.8	332.49	44.335	-0.011	-2.306
3_May_09_2015_33778640	1436-2447	S5	125.12	54.466	787	4421.1	4259.5	393.16	42.698	-0.001	-2.255
3_May_09_2015_34001312	763-1795	S5	132.68	56.484	711	4258.6	4121.3	314.02	47.64	0.0037	-1.934
3_May_09_2015_37022703	95-1135	S5	126.69	50.182	816	4609	4735.6	328.81	45.685	-0.002	-2.069
3_May_09_2015_37607546	868-1912	S5	123.7	51.527	787	4464	4425.5	382.37	40.859	-0.001	-2.214
3_May_09_2015_37877953	1475-2512	S5	131.68	52.485	918	4453.5	4210.9	368.05	45.761	-0.007	-2.074
3_May_09_2015_37986156	1677-2704	S5	125.12	53.149	787	4821.3	4691.3	292.45	46.152	-0.002	-1.974
3_May_09_2015_38458890	2898-3926	S5	127.63	53.85	639	4456.1	4379.4	343.22	44.681	-0.001	-2.442
3_May_09_2015_39812203	2943-4004	S5	128.69	53.353	735	4112.4	4035.1	327.85	44.409	0	-2.322
3_May_09_2015_39941578	960-1980	S5	115.72	52.735	816	4582.1	4694.2	339.78	46.636	-0.005	-2.69
3_May_09_2015_40381531	1631-2635	S5	117.36	49.502	711	4940.5	5033.9	396.98	46.339	-0.01	-2.193
3_May_09_2015_40520531	3088-4109	S5	118.71	51.079	773.5	4750.4	4784.1	309.49	46.759	-0.013	-2.296
3_May_09_2015_42715562	1173-2197	S5	133.54	53.091	678.5	4768	4748.3	333.59	46.94	-0.009	-2.348
3_May_09_2015_42753421	1463-2493	S5	122.94	55.642	865	4590.4	4491.5	356.52	46.832	-0.006	-2.37
3_May_09_2015_42806234	1973-2982	S5	126.32	55.495	639	4370.7	4308.5	331.61	46.554	-0.006	-1.909
3_May_09_2015_42811781	1564-2551	S5	122.7	53.669	816	4577.6	4542.1	339.5	46.61	0.0057	-2.684
	mean	S5	125.556	53.3909	862.05	4535.5	4467.97	341.405	45.9483	-0.00329	-2.24275
	SD		5.35124	1.96887	249.131	238.108	305.975	30.5688	2.04449	0.00507469	0.21699
	CV		0.0426203	0.0368764	0.288998	0.0524988	0.068482	0.0895383	0.0444954	-1.54246	-0.0967518
3_May_09_2015_32721406	2498-3519	S6	82.158	55.4	760	3752.4	3755.7	327	46.04	0.0028	-2.404
3_May_09_2015_33128437	2387-3390	S6	82.823	55.365	711	3716.7	3509.9	403.47	54.713	-0.001	-2.704
3_May_09_2015_33193078	2971-3976	S6	75.839	52.576	760	4046.4	3979	328.06	53.618	0.0087	-2.501
3_May_09_2015_33397750	2101-3111	S6	73.278	56.733	787	3864.9	3877.2	476.67	58.034	0.0085	-2.348
3_May_09_2015_33583937	1871-2888	S6	72.832	52.528	760	3998	4035.3	285.25	51.695	0.0022	-2.473
3_May_09_2015_33778640	1436-2447	S6	73.89	54.888	760	3824	4060.1	502.55	55.485	0.003	-2.334
3_May_09_2015_34001312	763-1795	S6	79.37	56.464	760	3991.1	4205.9	397.07	54.433	0.0168	-2.213
3_May_09_2015_37022703	95-1135	S6	74.841	49.304	735	3786.6	3736	395.98	49.908	0.0048	-2.223
3_May_09_2015_37607546	868-1912	S6	76.357	53.797	668	3338.2	3198.3	310.52	48.27	0.0133	-2.524
3_May_09_2015_37877953	1475-2512	S6	73.58	51.989	816	4051.3	4219.2	345.71	53.556	0.0004	-2.149
3_May_09_2015_37986156	1677-2704	S6	79.829	52.227	630	4194	4281.9	374.55	46.321	-0.015	-2.305
3_May_09_2015_38458890	2898-3926	S6	73.46	54.381	787	3877.1	3611.3	405.51	53.394	0.0247	-2.51
3_May_09_2015_39812203	2943-4004	S6	73.843	55.572	691.5	3973.8	4081.9	353.24	45.717	0.0024	-2.544
3_May_09_2015_39941578	960-1980	S6	69.852	54.084	747.5	3978.8	4169.4	310.12	54.52	0.0223	-2.534
3_May_09_2015_40381531	1631-2635	S6	68.854	50.717	760	4242.8	4242	320.54	56.771	-0.002	-2.428
3_May_09_2015_40520531	3088-4109	S6	72.845	53.383	760	4463.8	4495.2	296.89	52.818	0.0003	-2.826
3_May_09_2015_42715562	1173-2197	S6	80.827	53.33	760	3831.2	3862.9	323.73	54.602	-0.009	-2.718
3_May_09_2015_42753421	1463-2493	S6	78.832	54.91	760	3850.6	3653.6	392.71	53.683	0.0044	-2.564
3_May_09_2015_42806234	1973-2982	S6	76.836	55.043	787	3824.2	3713.8	324.72	48.086	0.0193	-2.335
3_May_09_2015_42811781	1564-2551	S6	72.378	51.898	787	4222.5	4371.2	348.67	48.155	0.0135	-2.654
	mean	S6	75.6262	53.7294	749.35	3941.42	3952.99	361.148	51.9909	0.00602	-2.46455
	SD		3.92031	1.92941	44.1421	237.277	325.023	57.5503	3.7271	0.0100668	0.179942
	CV		0.051838	0.0359097	0.0589072	0.060201	0.0822221	0.159354	0.0716875	1.67223	-0.073012
3_May_09_2015_32721406	2498-3519	S7	51.873	55.708	512	3805	3589.8	950.5	33.73	-0.004	-1.923
3_May_09_2015_33128437	2387-3390	S7	50.85	58.925	501	3698.4	3540.5	994	34.982	0.0196	-2.6
3_May_09_2015_33193078	2971-3976	S7	52.87	53.629	501	3937.5	3434.1	910.1	32.775	-0.006	-2.08
3_May_09_2015_33397750	2101-3111	S7	48.543	59.215	512	3786.2	3461.3	1097.6	32.145	0.0227	-2.09
3_May_09_2015_33583937	1871-2888	S7	47.897	55.122	512	4162.3	3954.4	954.8	29.533	0.0013	-1.889
3_May_09_2015_33778640	1436-2447	S7	46.884	56.55	501	4192.7	4327.7	1198.5	33.398	0.0033	-1.764
3_May_09_2015_34001312	763-1795	S7	52.34	59.109	501	3701.4	3396.5	1046.5	30.9	0.022	-2.181
3_May_09_2015_37022703	95-1135	S7	48.179	52.194	501	3583.7	3006.3	1220.6	24.332	0.0155	-1.96
3_May_09_2015_37607546	868-1912	S7	49.877	55.729	512	3851	3347.3	1123.6	30.141	0.0139	-2.166
3_May_09_2015_37877953	1475-2512	S7	48.579	54.994	512	4052.8	3649	900.2	33.173	0.0173	-2.053
3_May_09_2015_37986156	1677-2704	S7	50.25	52.984	501	4642.1	4693.4	824.3	33.85	0.012	-2.126
3_May_09_2015_38458890	2898-3926	S7	53.866	55.492	501	3895	3716.7	909.1	34.537	-0.009	-2.404
3_May_09_2015_39812203	2943-4004	S7	48.879	58.258	501	3642.6	3182	1046	27.983	-0.024	-2.277
3_May_09_2015_39941578	960-1980	S7	50.875	57.016	512	3943	4065.7	959.2	34.964	0.0066	-2.388
3_May_09_2015_40381531	1631-2635	S7	46.284	52.389	501	4617.5	4592.2	954	32.61	0.0151	-1.863
3_May_09_2015_40520531	3088-4109	S7	48.66	54.099	501	4959.2	4989.2	1280.3	29.248	0.0304	-1.81
3_May_09_2015_42715562	1173-2197	S7	49.86	55.941	501	4176.6	3879.1	1012.3	32.765	-0.006	-1.796
3_May_09_2015_42753421	1463-2493	S7	55.879	57.286	501	4061.1	4053.1	1135.6	30.713	-0.001	-2.159
3_May_09_2015_42806234	1973-2982	S7	48.246	56.815	512	3735	3390	828.03	37.533	0.0081	-1.91
3_May_09_2015_42811781	1564-2551	S7	53.868	54.185	512	4841.6	4868	910.1	32.876	-0.003	-2.115
	mean	S7	50.2279	55.782	505.4	4064.24	3856.81	1012.77	32.1094	0.00674	-2.0777
	SD		2.55224	2.14859	5.52887	404.977	575.684	128.582	2.91545	0.0133388	0.222649
	CV		0.0508131	0.0385177	0.0109396	0.0996441	0.149264	0.126962	0.0907974	1.97906	-0.107161
3_May_09_2015_32721406	2498-3519	S8	169.61	60.99	668	3943.8	3958.2	420.37	27.513	-0.006	-2.683
3_May_09_2015_33128437	2387-3390	S8	168.27	62.825	668	3674.2	3518.2	407.9	28.959	-0.009	-2.851
3_May_09_2015_33193078	2971-3976	S8	162.63	60.306	668	4181.5	4213.1	402.46	29.38	-0.004	-2.768
3_May_09_2015_33397750	2101-3111	S8	166.7	62.565	668	3949.2	4047.4	472.35	29.513	-0.003	-2.466
3_May_09_2015_33583937	1871-2888	S8	156.64	58.928	668	4156.1	4238.6	380.39	29.117	-0.007	-2.903
3_May_09_2015_33778640	1436-2447	S8	157.68	61.789	689	3960.8	3867.5	459.91	29.623	-0.008	-2.854
3_May_09_2015_34001312	763-1795	S8	172.6	62.833	668	3639.9	3463.7	487.72	26.706	-0.003	-2.547
3_May_09_2015_37022703	95-1135	S8	166.59	55.82	668	4256.7	4052.7	401.39	28.143	0	-2.4
3_May_09_2015_37607546	868-1912	S8	169.61	58.838	668	3739.4	3725.7	489.18	27.894	-0.002	-2.769
3_May_09_2015_37877953	1475-2512	S8	170.16	59.788	668	4467.1	4448.7	479.43	35.867	-0.009	-2.639
3_May_09_2015_37986156	1677-2704	S8	165.62	59.785	668	4260	4154.9	421.74	26.661	-0.002	-2.707
3_May_09_2015_38458890	2898-3926	S8	165.88	60.924	668	3888.4	3786.7	470.5	30.775	-0.002	-2.984
3_May_09_2015_39812203	2943-4004	S8	167.61	61.627	668	4042.1	4136.4	497.86	30.445	0.003	-2.819
3_May_09_2015_39941578	960-1980	S8	166.62	61.449	668	3794.5	3640.2	459.86	28.968	-0.009	-3.244
3_May_09_2015_40381531	1631-2635	S8	164.59	57.749	668	4655.4	4661.6	443.22	27.87	-0.007	-2.871
3_May_09_2015_40520531	3088-4109	S8	161.63	56.103	668	4577	4614.4	392.4	34.735	-0.005	-2.585
3_May_09_2015_42715562	1173-2197	S8	165.66	61.548	668	3839.3	3799.5	465.57	29.689	-0.008	-3.082
3_May_09_2015_42753421	1463-2493	S8	164.33	60.518	668	3852.6	3705	459.2	26.472	-0.018	-2.855
3_May_09_2015_42806234	1973-2982	S8	162.63	60.953	668	3925.8	3876.2	350.46	28.311	-0.004	-2.467
3_May_09_2015_42811781	1564-2551	S8	166.16	59.546	668	4497.3	4657.4	358.17	29.414	-0.007	-2.958
	mean	S8	165.561	60.2442	669.05	4065.06	4028.3	436.004	29.3028	-0.0055	-2.7726
	SD		3.94543	1.99161	4.69574	303.891	363.785	44.8748	2.38365	0.00440693	0.21618
	CV		0.0238307	0.0330589	0.00701852	0.074757	0.0903071	0.102923	0.0813457	-0.80126	-0.0779701
	CV	Syllable	Duration	Amplitude	Pitch	Mean freq	Peak_freq	Goodness	FM	AM	Entropy
		S1	0.0508895	0.0334546	0.01544	0.126059	0.200771	0.0909511	0.113475	0.61992	-0.108346
		S2	0.0568545	0.0314486	0.0136758	0.088359	0.108657	0.0626212	0.129655	1.7963	-0.0572008
		S3	0.0304417	0.0326478	0.012326	0.109066	0.143091	0.103407	0.0372617	-3.84791	-0.0826591
		S4	0.0621172	0.0395	0.0550461	0.0996545	0.114	0.113561	0.0691926	3.68632	-0.113952
		S5	0.0426203	0.0368764	0.288998	0.0524988	0.068482	0.0895383	0.0444954	-1.54246	-0.0967518
		S6	0.051838	0.0359097	0.0589072	0.060201	0.0822221	0.159354	0.0716875	1.67223	-0.073012
		S7	0.0508131	0.0385177	0.0109396	0.0996441	0.149264	0.126962	0.0907974	1.97906	-0.107161
		S8	0.0238307	0.0330589	0.00701852	0.074757	0.0903071	0.102923	0.0813457	-0.80126	-0.0779701
		mean	0.0461756	0.0351767	0.057794	0.0887799	0.119599	0.106165	0.0797388	0.445275	-0.0896317

[truncated: 3 more sheets: yellow 30, yellow 33, yellow 37]
