# Supplementary material for: miR-9 regulates basal ganglia-dependent developmental vocal learning and adult vocal performance in songbirds
Source: eLife journal article supplement (doi:10.7554/elife.29087), 2018-01-18
Supplement: supp [file elife-29087-supp-v1.zip › elife_poa_e29087_Figure_5_source_data_1.xlsx]

## Sheet: Sheet1
cFF
Control		UDS	DS	ratio		miR-9		UDS	DS	ratio
grey 140	S1	0.0066408	0.00667714	0.994558		grey 139	S1	0.0131822	0.0135639	0.97186
grey 140	S2	0.0108986	0.00621931	1.75238		grey 146	S1	0.0191623	0.0160028	1.19743
grey 140	S5	0.00597071	0.00848016	0.704079		grey 146	S6	0.0144185	0.014094	1.02302
grey 140	S6	0.0145588	0.0113846	1.27882		yellow 14	S1	0.00978826	0.0125757	0.778346
grey 140	S7	0.00863696	0.007647	1.12946		yellow 14	S6	0.00952547	0.00886571	1.07442
grey 147	S1	0.00957897	0.00942041	1.01683		yellow 23	S1	0.0271029	0.0218564	1.24004
grey 147	S2	0.0135907	0.0107449	1.26485		yellow 23	S2	0.0199785	0.0171308	1.16623
grey 147	S3	0.0175267	0.0138055	1.26955		yellow 30	S2	0.0218759	0.0244043	0.896396
grey 180	S1	0.0112824	0.00481761	2.34191		yellow 33	S1	0.031131	0.0265868	1.17092
grey 180	S3	0.00831039	0.00443564	1.87355		yellow 33	S3	0.0130892	0.0115736	1.13095
yellow 16	S1	0.0148363	0.0212111	0.699459		yellow 33	S4	0.0108675	0.0160927	0.675306
yellow 16	S2	0.00866274	0.00681598	1.27095
yellow 16	S3	0.0191425	0.0126839	1.5092
yellow 16	S4	0.0127911	0.00808839	1.58141
yellow 29	S1	0.0170583	0.00872075	1.95606
yellow 29	S2	0.00618409	0.00673073	0.918786
yellow 29	S3	0.0118929	0.0093435	1.27286
yellow 29	S4	0.0116955	0.00916084	1.27668
yellow 37	S1	0.00709553	0.00850167	0.834605
yellow 37	S3	0.00752404	0.00448125	1.67901
yellow 37	S6	0.0103945	0.00827156	1.25666
												miR-9
control
Paired Samples Test												Paired Samples Test
		Paired Differences					t	df	Sig. (2-tailed)					Paired Differences					t	df	Sig. (2-tailed)
		Mean	Std. Deviation	Std. Error Mean	95% Confidence Interval of the Difference									Mean	Std. Deviation	Std. Error Mean	95% Confidence Interval of the Difference
					Lower	Upper											Lower	Upper
Pair 1	VAR00009 - VAR00010	0.00222051	0.00332297	0.000725132	0.000707909	0.00373311	3.06221	20	0.00614921			Pair 1	VAR00001 - VAR00002	0.000670452	0.00325226	0.000980592	-0.00151444	0.00285535	0.683722	10	0.509683
