# Supplementary material for: miR-9 regulates basal ganglia-dependent developmental vocal learning and adult vocal performance in songbirds
Source: eLife journal article supplement (doi:10.7554/elife.29087), 2018-01-18
Supplement: supp [file elife-29087-supp-v1.zip › elife_poa_e29087_Figure_8_figure_supplement_1.pdf]

Figure 8 - figure supplement 1

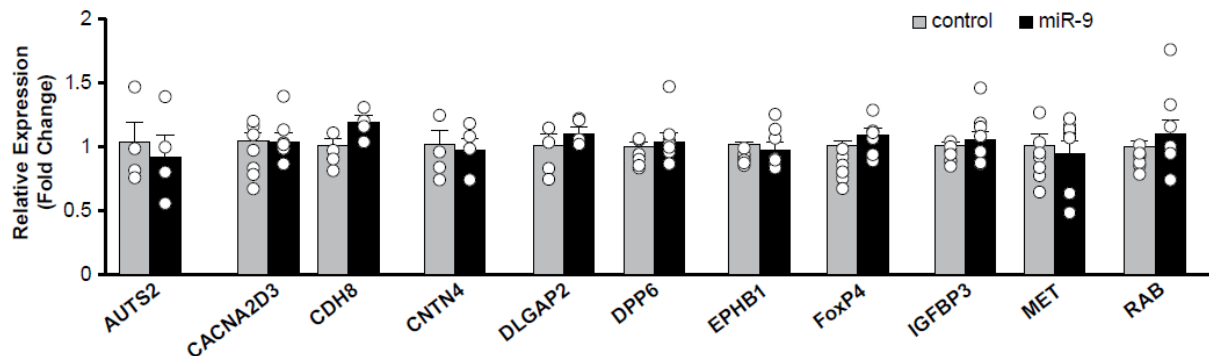

**Downstream target genes of FoxP1 and FoxP2 that did not change expression in Area X by miR-9 overexpression.** Viral injection into Area X was performed at 25 days of age, and gene expression was analyzed one month later by qRT-PCR. Reverse transcription and qRT-PCR were performed two times, and qRT-PCR was performed in triplicate. All p values > 0.05, unpaired t-test. n = 7 for all genes except for *AUTS2*, *CDH8*, *CNTN4*, *DLGAP2*, n = 4. Error bars, SEM.
