# Supplementary material for: miR-9 regulates basal ganglia-dependent developmental vocal learning and adult vocal performance in songbirds
Source: eLife journal article supplement (doi:10.7554/elife.29087), 2018-01-18
Supplement: supp [file elife-29087-supp-v1.zip › elife_poa_e29087_Supplementary_file_1.xlsx]

## Sheet: Sheet1
Supplementary file 1. Symbols, Names, and Functional Descriptions of Genes.
Symbol	Gene name	Functions	Disorders
ABAT	4-aminobutyrate aminotransferase	GABA inhibitory neurotransmitter catabolism	psychomotor retardation, seizures, autism
ATRX	chromatin remodeler	chromatin remodeling, DNA methylation	X-linked mental retardation, autism
BDNF	brain derived neurotrophic factor	signaling molecule for cell differentiation, synaptic plasticity
CADPS2	calcium-dependent secretion activator 2	exocytosis of synaptic vesicles	autism spectrum disorder
CNTNAP2	contactin associated protein-like 2	cell adhesion, synaptic connection	autisms, schizophrenia, speech delay
CTNNA3	catenin (cadherin-associated protein), alpha 3	cell-cell adhesion	autism spectrum disorder
DISC1	disrupted in schizophrenia 1	neural migration, dendritic/synapse development	schizophrenia, autism and Asperger syndrome
FRMPD4	FERM/PDZ domain containing 4	dendritic spine morphogenesis and density	autism and schizophrenia
GRIK2	glutamate receptor, ionotropic kainate 2	excitatory transmission, synaptic plasticity
GRM8	metabotropic glutamate receptor 8	neural transmission, cAMP signaling
GRIN2B	glutamate receptor NMDA type subunit 2B	excitatory neurotransmission	autism spectrum disorder, schizophrenia
IFG2	insulin Like Growth Factor 2	signaling peptide for development and growth
KCNA4	potassium voltage-gated channel subfamily A member 4	neural transmission	linguistic disability, ADHD and cognitive impairments
MEF2C	myocyte enhancer factor 2C	neurogenesis, cortical development	mental retardation, stereotypic movements, autism
MMP2	matrix metallopeptidase 2	breakdown of extracellular matrix, cell adhesion
MTF1	metal-regulatory transcription factor 1	metal homeostasis.
NeuroD6	neuronal differentiation 6	transcription factor in neural differentiation
NRXN3	neurexin 3	cell adhesion molecule	autism spectrum disorder, depression
NTRK3	neurotrophic receptor tyrosine kinase 3	signaling molecule for cell differentiation	autism and Angleman’s syndrome, ADHD, schizophrenia
PTPRD	protein tyrosine phosphatase, receptor D	neurite growth and axon guidance
SOX5	SRY-box 5	transcription factor	ASD, developmental delay/intellectual disability
SRPX2	sushi-repeat containing protein, X-linked 2	cell migration, adhesion, and synapse formation	epilepsy, dyspraxia, mental retardation
STX1A	syntaxin-1A	synaptic vesicle docking, neurotransmitter exocytosis	autism and Asperger syndrome
UBE2L3	ubiquitin-conjugating enzyme E2L3	proteins degradation	autism spectrum disorder
UBE3A	ubiquitin protein ligase E3A	protein degradation	autism, Angleman’s syndrome
VLDLR	very-low-density-lipoprotein receptor	reelin signaling and neuron migration
Supplementary file 1. Symbols, names, and functional descriptions of genes shown in Figure 8. Functional descriptions are based on NCBI (National Center for
Biotechnology Information) database. For associations between genes and neurodevlopmental and mental disorders, see the online database SFARI Genes (Simons
Foundation Autism Research Initiative) and references therein. For genes not included in the SFARI Gene list (e.g., KCNA4 and SRPX2), see references cited in the main text.
