# Supplementary material for: miR-9 regulates basal ganglia-dependent developmental vocal learning and adult vocal performance in songbirds
Source: eLife journal article supplement (doi:10.7554/elife.29087), 2018-01-18
Supplement: supp [file elife-29087-supp-v1.zip › elife_poa_e29087_Supplementary_file_2.xlsx]

## Sheet: summary for primer
Supplementary file 2. Primer sequences.
Gene	Full name	NCBI No.	sense	anti-sense
ABAT	GABA Transferase	XM_012577109	TCCATCCCAATAGGTTAC	GAGCCACTGATAGCAAAG
ATRX	Alpha Thalassemia/Mental Retardation Syndrome X-Linked	XM_012573110	TGGTCCCAGTCCTAACAA	TCATCATCCCTGCTTCTT
AUTS2	autism susceptibility candidate 2	XM_012578647	AGGAAACCTGGCAAGTGG	ACTGGCGGTGGAGAAGAG
BDNF	brain-derived neurotrophic factor	XM_012573738	TGGCTTACCCAGGTCTTCG	TGCATCCTTGTTTCCCTCA
CACNA2D3	calcium channel, voltage-dependent,alpha 2/delta subunit 3	XM_002192832	AAGCAATCAAACGCTACCT	AGAGTCCAGTCCGTGTCCC
CADPS2	Ca++-dependent secretion activator 2	XM_004177213	AGCAGCCCAGATAAGACG	TCACTGAAGACCGCAACTC
CNTN4	Contactin 4	XM_012573774	AAATGCTACGGACGACAT	CAGTCAACTCCAGCCAAT
CNTNAP2	contactin associated protein-like 2	NM_001193337	ACATCCAGTTATTGCTCGGTA	CAAGTTTGGCTTTCTTCAGTT
CDH8	cadherin 8, type 2 (CDH8	XM_012571375	TTTTCCATTGATCGCCACA	TTGATAGCAACAGGCACCC
DISC1	disrupted in schizophrenia 1	XM_004176377	GCTGCCTGACTGTATTCC	TCTCCTTTGCCTGTTGTG
DLGAP2	large (Drosophila) homolog-associated protein 2 (DLGAP2)	XM_012572847	GTTCTTGGTCCACGCTTAC	GCTCCCACTTCTCATTCTTC
DPP6	dipeptidyl-peptidase 6 (DPP6)	XM_002189663	CAAGCCATCCGAGTGGT	GGGACTCTGGAGGCATTA
DRD1	dopamine receptor D1	NM_001243833	CATCCAAGGGAGCAGAGGC	AATCGGCGTTGAAGGCATA
DRD2	dopamine receptor D2 (DRD2)	XM_002191611	GGGGACAGGAACTGGAGCA	CGATGATGAAGATGAGGAGGG
EPHB1	EPH receptor B1	XM_004176463	CTGGCAGAAGGACCGCAACA	TGAGGTAAAGGCAGTGAAGTCG
FoxP1	forkhead box P1	AY549152	CAACTCCAAGTCCTGCTC	GGCTCTTTAGGCTGTTTT
FoxP2	forkhead box P2	NM_001048263	GACTCATTTCCATCCCACC	GGTCTAGCCCTCCATGTTTA
foxp4	forkhead box P4	NM_001279260	GAAGAACGCCGTCCGCCACA	GCTCCGTAACCGAGTCCTGAA
FRMPD4	FERM and PDZ domain containing 4 (FRMPD4)	XM_002194935	CCTTATGGATGGGAGATGA	CCTGGTGTTACTGAGCGTA
GAPDH	glyceraldehyde-3-phosphate dehydrogenase	NM_001198610	ATGGCATCCAAGGAGTAA	GGAGACAAGGGAACAGAAC
GRIK2	glutamate receptor, ionotropic,kainate 2	XM_002196493	TTGCCCAGAAGAGGAAAGT	CTGCCACAAAGACAGAAAGC
GRIN2B	Glutamate Receptor, Ionotropic, N-Methyl D-Aspartate 2B	XM_002195849	CAAGATCCGCAGTACCAT	TGGCTATTCCATCCCTTA
GRM8	glutamate receptor, metabotropic 8 (GRM8)	XM_002189714	GGTCCCACCAGACTCCTAC	TCATCTTCATTCGCAAACA
IGFBP3	insulin-like growth factor binding protein 3 (IGFBP3)	XM_002192075	TCTCACAGGGTGCCAGATTC	AGATGGGCGACATTGCTTT
KCNA4	potassium voltage-gated channel,shaker-related subfamily, member 4	XM_004176184	TCTTGCCTTACTTCATCACCC	AGATGCGAAACACCCTGAC
MEF2C	Myocyte Enhancer Factor 2C	XM_012577422	GAATGAACAACCGTAAACC	TGAGTAGAAGGCAGGGAG
MET	met proto-oncogene (hepatocyte growth factor receptor)	XM_002193399	TCGCTTAGAAGTTACGACTC	TCTGAAGTTCCCAGGTTAG
MMP2	matrix metallopeptidase 2	XM_002192669	TGACGGAGAAGCAGACATT	TATTCCTTGCCATTGAACC
MTF1	metal-regulatory transcription factor 1 (MTF1)	XM_002198088	CCACTTGCCTTTCTTACCC	TTGCTCCTTCAATGTTCCTT
NEUROD6	neuronal differentiation 6, transcript variant 2	XM_004175518	AAAAGACGAGCAAGATAAGG	TTCAGAAAGAGCCCAAAT
NRXN3	Neurexin 3	XM_012574117	AGGCAGCGATGGTTGTGA	ACCAGTTTCGGAGACTTTGTTA
NTRK3	neurotrophic tyrosine kinase, receptor, type 3	XM_012573607	CAATGGATTCCTGCTTACCT	GTTGTAGTGAGTGGGTTTGTTG
PTPRD	Protein Tyrosine Phosphatase, Receptor Type, D	NM_001177530	GGCAGGACTGGCTGTTTCATT	CTGGCTGGCACTTCGGTATTT
RAB	retinoic acid receptor, beta, transcript variant 1	XM_002197349	CCTCCTTCACCACTTCCA	GCCCTTACATCCCTCACA
SOX5	Transcription Factor SOX-5	XM_012569219	CTCCCACATCACCCACCTC	GACCCAGGCTGTTCACCAC
SRPX2	sushi-repeat containing protein, X-linked 2	XM_002190684	TGGATTCCCGATGTGACTAC	CTTGCCTGGCTCTGCTAT
STX1A	Syntaxin 1A	XM_012568613	AAAGAAGACGGCGAACAAA	CGACATCCCTCAACGAACT
UBE2L3	ubiquitin-conjugating enzyme E2L 3	XM_012578119	GGCAAGGGCTTATTGTTCC	TTCACCAGTGCTATGAGGG
UBE3A	ubiquitin protein ligase E3A (UBE3A)	XM_002197187	AGCAGTCAGACGGGTCTATG	AAGATTGCCGTTCTCCATA
VLDLR	very low density lipoprotein receptor (VLDLR)	XM_002194008	GACCTCGACTTGCATTCCC	CACTGGCAGAGCACTTCACA
Supplementary file 2. Sequences of primers used in all qRT-PCR experiments.
