# Supplementary figures and images for: miR-9 regulates basal ganglia-dependent developmental vocal learning and adult vocal performance in songbirds
Source: eLife journal article supplement (doi:10.7554/elife.29087), 2018-01-18

Figure 3 figure supplement 1

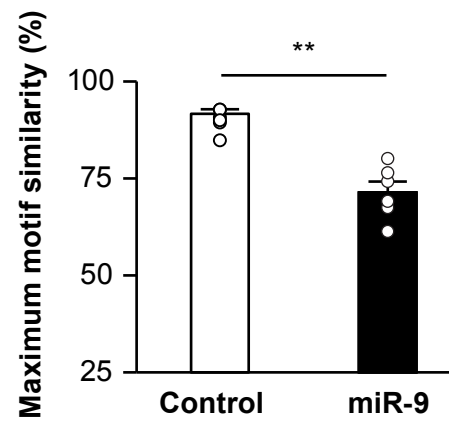

Supplement: supp [file elife-29087-supp-v1.zip]

Figure 6 figure supplement 1

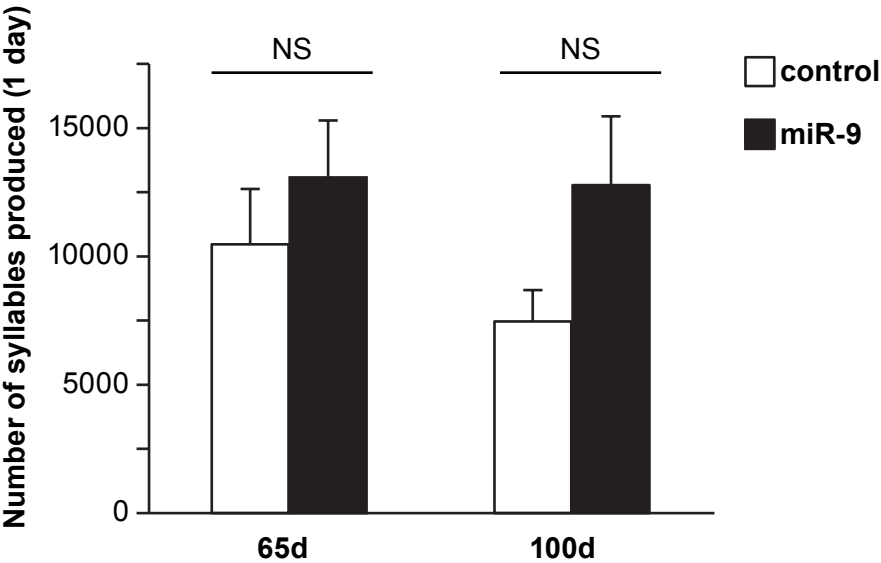

Supplement: supp [file elife-29087-supp-v1.zip]

Figure 1 figure supplement 2

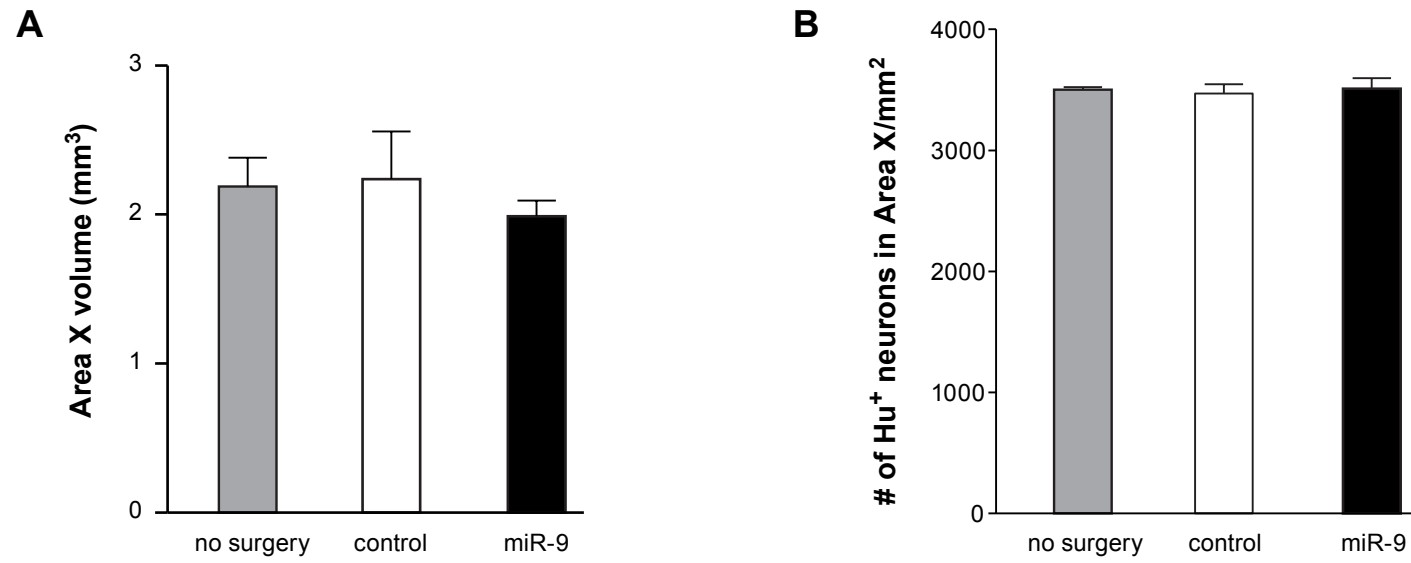

Supplement: supp [file elife-29087-supp-v1.zip]

Figure 1 figure supplement 1

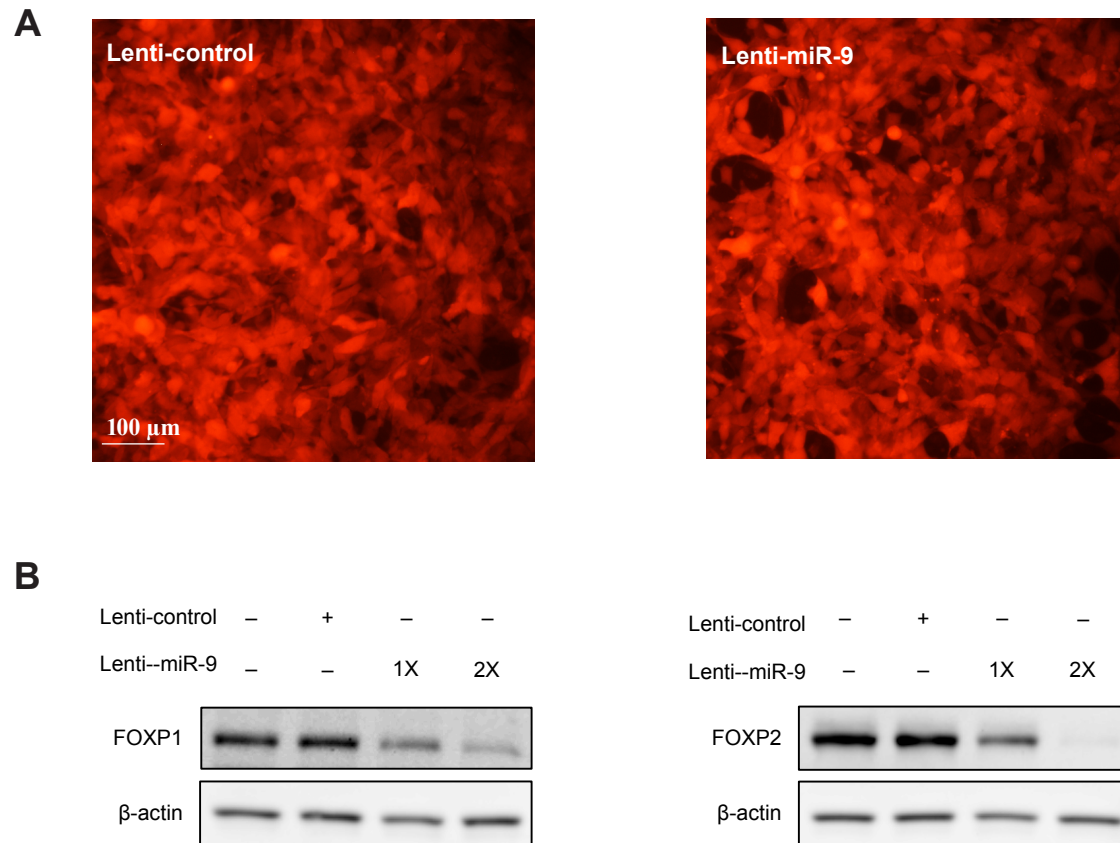

Supplement: supp [file elife-29087-supp-v1.zip › elife_poa_e29087_Figure_1_figure_supplement1.pdf]

Figure 7 figure supplement 1

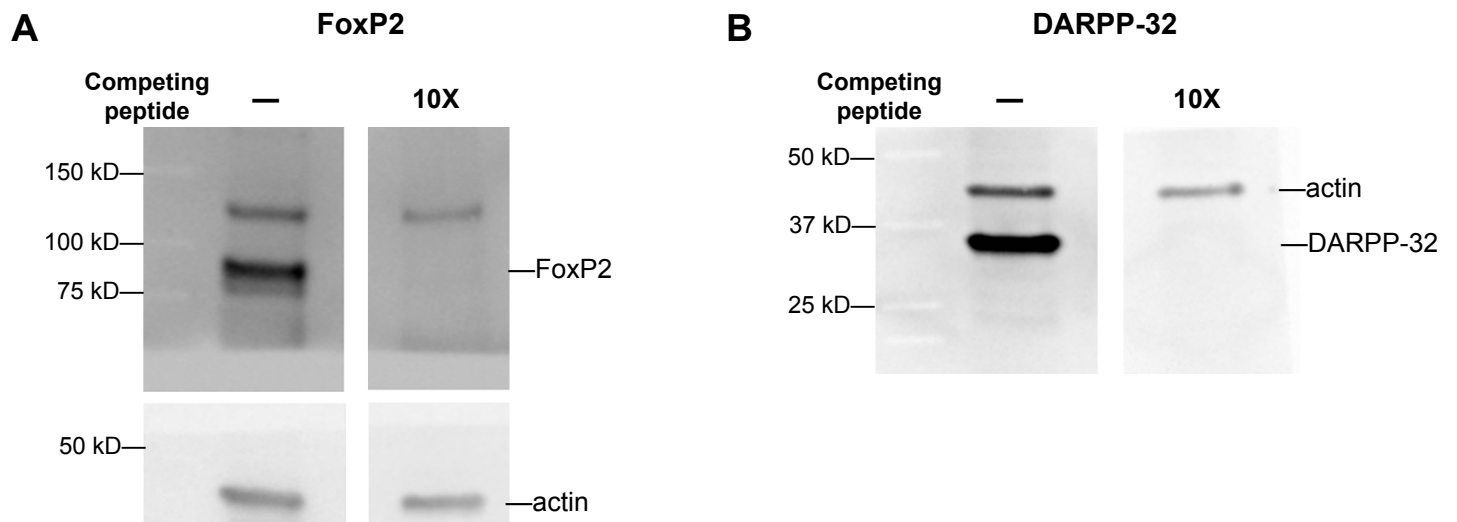

Supplement: supp [file elife-29087-supp-v1.zip › elife_poa_e29087_Figure_7_figure_supplement_1.pdf]
